# Supplementary material for: Transcriptomic point of departure determination: a comparison of distribution-based and gene set-based approaches
Source: Frontiers journal article supplement (doi:10.3389/fgene.2024.1374791), 2024-05-09
Supplement: Data_Sheet_3.zip [file Data_Sheet_3.zip]

## Sheet: Read me
Filename	Supplementary File 12
Description	tPOD results for each of the 1000 simulations across the different reduction scenarios and gene set structures.
Mentioned in the text	Section 3.3

## Sheet: GOBP-60Perc
	acetazolamide	adapin	ajmaline	allopurinol	allylalcohol	amiodarone	amitriptyline	aspirin	azathioprine	benzbromarone	benziodarone	bromobenzene	bromoethylamine	bucetin	caffeine	carboplatin	chlormezanone	chlorpheniramine	chlorpromazine	cimetidine	ciprofloxacin	clofibrate	clomipramine	colchicine	coumarin	cyclophosphamide	cyclosporinea	diazepam	diclofenac	doxorubicin	enalapril	erythromycinethylsuccinate	ethanol	ethionamide	ethionine	etoposide	furosemide	gentamicin	griseofulvin	haloperidol	hydroxyzine	ibuprofen	imipramine	indomethacin	iproniazid	isoniazid	ketoconazole	labetalol	lornoxicam
Set1	251.958	38.6049	32.1292	36.7476		26.2264	21.9763	29.282	1.01846	5.53867	8.07451	12.3101	1.19983	69.3526	6.14125	0.923336	14.1954		10.7588	300.113	46.7608	7.11904		0.208484	8.81237	0.748717	4.17741	44.1707	2.54951	0.0351795		220.36		26.395	3.84608	2.01107	77.7759	3.39892	53.7439	12.1916	5.78013	6.976	27.6427		1.57553	19.9756	2.88527	26.2761	0.0844279
Set2	57.7998	6.43539	31.3097	14.7018		26.3399	21.9763	45.4193	0.784323	2.76867	8.73273	16.2568	1.17614	183.913	7.22734	0.616172	14.2625	10.7767	12.7694		266.343	7.11904		0.213599	3.21069	1.18812	4.33288	16.0376	2.42025	0.0385853	147.759	287.006	408.271	26.395	5.01382	7.14109	26.7772	2.70553	231.143	7.79658	5.78013	9.61248	6.53812		1.71384	19.9756	7.95271	38.5825	0.0733301
Set3	181.342	6.43539	39.2562	14.7018		28.7905	23.7044	29.282	0.927279	4.78571	7.42665	12.3101	1.19983	178.796	6.14125	0.46671	5.03823		2.76687		79.0718	7.78599		0.294582	5.9569	0.92433	5.61221	16.8122	2.63276	0.0385853		69.1586	408.271	23.0654	3.28053	8.6506	30.6617	2.68945	115.109	8.57751	4.72465	10.254	6.53812		1.71384	62.6281	5.00636	52.2467	0.0858704
Set4	35.174	58.6523	21.7895	18.2062		26.2264	20.7764	29.282	0.942191	3.43016	9.18357	26.8945	4.74873	69.3526	6.49766	0.477056	18.6882		4.17057	279.021	79.0718	7.11904	36.1001	0.208484	9.61854	1.18812	4.0084	16.0376	2.54951	0.045656	147.759	70.91		21.0022	3.70794	9.75247	48.1872	5.08892	188.202	7.4253	5.78013	9.61248	40.3495		0.817671	19.9756	3.32539	88.2577	0.0844382
Set5	67.5088	6.43539	31.3097	18.2062		26.7417	22.8327	33.1195	0.784323	3.43016	7.59344	16.2568	4.74873	253.726	6.14125	0.50709	8.99574		4.33957			7.11904		0.343061	3.21069	0.748717	4.0084	16.0376	1.26566	0.0351795	147.759	71.9155	1789.52	23.3304	3.99359	7.32979	66.6309	2.72223	53.7439	7.87746	5.79144	7.45952	6.53812		0.657648	53.5555	2.88527	26.2761	0.0733301
Set6	44.6829	20.3646	26.4191	14.7018		24.5801	22.8327	46.0037	0.980235	3.43016	7.49444	23.7059	1.50086	69.3526	3.99419	0.46671	5.03823		2.76687		46.7608	7.78599	36.1001	0.230555	5.83287	0.91908	4.48387	34.0688	1.83219	0.0251246	147.759	70.91	408.271	23.3304	3.64917	11.1188	29.2963	4.2666	231.932	7.95833	5.79144	8.58981	6.53812		0.817671	40.4402	4.40396	46.0807	0.0844279
Set7	41.5916	38.6049	31.5962	14.7018		12.6016	20.7764	29.282	0.977652	5.38904	7.49444	38.0969	1.17614	119.353	7.71052	0.477056	10.1951		2.76687	279.021		9.46655	37.8822	0.260688	9.89442	1.18812	6.82496	23.8984	1.26566	0.0251246		207.697	1190.86	27.5875	3.70794	7.32979	30.6617	4.2666	226.99	9.37473	5.79144	8.58981	39.8722		0.657648	19.9756	6.80712	26.2761	0.0733301
Set8	162.124	20.3646	21.7895	30.2121		22.9963	25.1042	33.841	0.863257	3.72627	7.42665	7.63173	1.19983	69.3526	6.70656	0.616071	10.1951	10.7767	4.33957			7.11904	36.1001	0.230555	5.9569	0.748717	4.33288	15.0673	1.26566	0.045656	211.245	212.423		27.5875	3.70794	2.01107	30.6617	2.6803	115.109	7.79658	5.80275	10.7653	31.7851		1.32948	43.1557	4.76429	26.2761	0.0870369
Set9	251.958	6.43539	21.7895	14.7018		28.9467	21.9505	32.9922	0.977652	3.72627	7.49444	15.897	1.49295	182.853	12.7486	0.50709	10.1951		12.9821			7.78599		0.213599	3.21069	1.15737	2.4026	61.5021	1.26566	0.0351795		70.91		22.7586	3.99359	9.41665	26.7772	4.2666	115.109	8.91785	4.72465	11.9094	40.5495		1.97223	19.9756	7.19645	58.4128	0.0733301
Set10		20.3646	31.5962	18.2062		11.973	21.9763	72.8569	0.784323	3.43016	9.14423	12.3101	1.19983	178.796	8.0922	0.756352	5.03823		2.76687			7.11904		0.25409	5.9569	1.42014	4.48387	16.0376	2.38692	0.0433572		69.1586		29.6678	3.99359	10.1136	25.652	5.08892	268.201	7.95833	5.51173	7.45952	36.0389		1.57553	14.4007	4.92448	46.0807	0.0844279
Set11	36.8372	28.6497	31.5962	30.2121		21.4978	22.8327	28.024	1.26295	4.70088	8.30485	15.897	4.63705	253.726	6.49766	0.616071	5.03823		11.6778		46.7608	7.11904	36.1001	0.213599	3.21069	1.15737	4.17741	16.8122	1.26566	0.0417842		70.91		23.0654	4.33921	5.9043	66.6309	2.68945	188.202	7.79658	5.63981	9.02068	39.8722		0.657648	14.4007	5.69468	26.2761	0.0844279
Set12	35.174	20.3646	25.938	14.7018		26.2264	21.9763	29.282	0.977652	3.72627	7.39543	35.9239	1.17614	182.853	8.36604	0.756352	17.8797		10.7588			7.11904	36.1001	0.343061	7.99711	1.18812	5.4126	23.8984	1.26566	0.0402038	221.347	287.006	1190.86	21.0022	4.01121	7.32979	75.3275	4.2666	115.109	7.77747	6.2988	8.58981	8.21714		1.32948	14.4007	5.00636	26.2761	0.0767362
Set13		6.43539	21.7895	19.9357		26.2264	21.9763	29.282	0.927279	4.7652	7.49444	16.9885	1.23708	183.913	7.21268	0.616071	18.6347		11.6778			10.7319	36.1001	0.208484	5.9569	1.15737	4.48387	16.8122	2.64937	0.045656		250.664	408.271	17.8968	4.27732	6.9524	29.2963	2.6803	53.7439	7.95833	5.63981	10.8707	6.53812		2.49195	62.6281	5.5812	58.4128	0.0844382
Set14	67.3085	37.9099	59.2747	14.7018		26.3399	20.7764	29.282	0.977652	4.08588	7.59344	12.3101	1.17614	119.353	7.21268	0.616071	14.1954		8.85429	279.021		7.78599	36.1001	0.213599	8.96992	1.15737	4.48387	27.3477	2.42025	0.0417842		254.275		22.7586	4.06172	2.01107	25.652	2.68945	231.932	8.57751	5.80275	6.976	31.576		0.817671	14.4007	5.46381	75.305	0.0864537
Set15		6.43539	21.7895	30.1332		21.4978	21.9763	29.282	0.942191	6.06092	7.39543	7.63173	1.17614	55.853	8.0922	0.395367	14.1954		2.76687	279.021		9.46655		0.343061	5.83287	0.92433	4.0084	34.0688	1.26566	0.0638849	221.347	69.1586		29.0283	3.28053	11.097	30.6617	2.68945	80.9232	7.95833	5.79144	7.47142	8.21714		0.657648	14.4007	5.46381	26.2761	0.0733301
Set16	86.7265	60.267	21.7895	14.7018		27.7372	18.7967	61.547	1.02615	3.77719	7.39543	29.2052	1.49295	182.853	11.0779	0.50709	14.1954		13.5013			9.46655	36.1001	0.208484	8.98037	1.15737	4.0084	23.8984	1.26566	0.0433572		220.36	408.271	17.757	4.06172	10.1136	48.1872	2.6803	115.109	7.79658	5.80275	10.3087	31.576		0.657648	19.9756	2.88527	26.2761	0.0844382
Set17	275.957		31.5962	39.7553		29.248	25.4361	28.024	0.850156	3.43016	7.87026	7.63173	1.19983	69.3526	6.14125	0.616071	8.99574		8.09591		84.6622	7.78599		0.208484	5.9569	0.748717	4.17741	46.2461	2.54361	0.0351795	147.759	71.9155	1789.52	25.1286	3.84608	7.32979	29.2963	2.6803	115.109	7.95833	6.3335	7.44762	39.8722		0.646661	40.4402	3.32539	26.2761	0.0733301
Set18	45.8086	20.3646	31.3097	33.7172		26.2264	20.7764	38.4968	0.784323	1.4214	5.21587	16.6425	5.60193	259.558	9.64394	0.398109	10.1951		13.0152		79.0718	7.78599		0.213599	8.62603	0.92433	4.81939	23.8984	1.26566	0.0671363		69.1586	1190.86	31.0372	3.64917	7.32979	30.6617	2.72223	268.201	7.65687	5.79144	6.976	8.21714		0.408836	70.6365	2.88527	58.4128	0.0733301
Set19		6.43539	48.5531	18.2062		23.9359	20.7764	38.4968	0.980235	3.72627	8.07451	7.63173	1.29945	173.678	6.14125	0.398109	5.03823		4.17057			9.01195		0.213599	3.21069	1.15737	4.48387	34.0688	1.26566	0.0417842	147.759	69.1586	1789.52	24.5768	3.77153	2.01107	30.6617	4.23061	98.0799	7.72673	6.10755	7.45952	6.53812		0.657648	40.4402	5.69468	31.0842	0.0733301
Set20	35.174		31.3097	14.7018		22.9963	20.7764	33.1195	0.980235	3.72627	6.45339	22.5511	1.23708	69.3526	6.14125	0.50709	12.3961		2.69315		79.0718	9.00815	36.1001	0.260688	8.91495	1.29581	4.33288	10.7516	2.12622	0.0385853	147.759	69.1586		21.0022	3.99359	9.98623	56.8627	2.6803	233.102	7.65687	6.10755	6.976	8.21714		0.817671	19.9756	4.40396	26.2761	0.0733301
Set21		25.0538	21.7895	14.7018		12.6016	20.5575	29.282	0.942191	5.94591	7.59344	16.2568	1.17614	173.678	6.72864	0.46671	14.1954		2.76687	279.021	394.928	9.46655	36.1001	0.213599	8.68369	0.953044	4.66134	16.0376	2.46969	0.0402038		275.292	408.271	22.7586	3.99359	2.01107	26.7772	5.12134	115.109	8.57751	5.80275	6.976	6.53812		0.408836	40.4402	3.32539	26.2761	0.0733301
Set22	45.2487	6.43539	47.6799	14.7018		27.7372	20.7764	34.0896	0.784323	4.78571	7.42665	16.729	2.1769	221.206	6.95962	0.477056	18.6065		2.76687		79.0718	7.11904		0.213599	3.21069	0.92433	4.81939	23.8984	1.26566	0.0543341	221.347	164.731	1190.86	29.2034	5.16967	2.01107	31.0441	5.08805	115.109	7.77747	5.63981	7.47142	31.576		0.408836	62.6281	5.94457	38.5825	0.0733301
Set23	36.8207	6.43539	21.7895	37.5903		24.5217	20.7764	33.1195	0.784323	3.72627	7.42665	12.3101	1.19983	183.913	8.28076	1.05585	14.2625		13.0152		266.343	9.47711		0.213599	5.83287	1.15737	4.66134	16.7657	2.54951	0.0402038	147.759	70.91	408.271	27.6849	3.70794	6.9524	31.0441	2.72223	53.7439	7.79658	5.78629	6.39537	26.1098		0.408836	43.1557	4.92448	31.0842	0.0858704
Set24	67.3085	28.6497	21.7895	14.7018		23.165	24.7586	34.0896	0.863257	3.43016	6.97391	15.897	2.1769	178.796	6.14125	0.477056	14.1954		2.76687	300.113		7.78599		0.213599	3.21069	1.59568	4.48387	23.8984	2.22341	0.0302683		69.1586		23.3304	3.64917	5.9043	73.1548	3.75541	53.7439	7.95833	5.63981	6.976	22.0189		2.41205	14.4007	4.92448	44.7485	0.0844382
Set25	61.1881	6.43539	66.484	30.1919		26.3399	21.9763	35.2762	0.980235	3.77719	7.42665	17.9295	1.23708	69.3526	7.21268	0.923336	5.03823		2.76687	279.021	46.7608	7.78599	37.8822	0.294582	8.96992	1.18812	4.48387	16.0376	2.12622	0.0351795		69.1586		21.0022	3.64917	2.01107	31.0441	3.55941	83.712	11.0926	6.54667	7.44762	6.53812		0.817671	17.732	2.88527	26.2761	0.0733301
Set26		6.43539	31.3097	14.7018		26.3399	21.9763	29.282	0.863257	3.43016	8.07451	18.336	3.26056	183.913	6.95962	0.46671	18.7971	10.7767	12.4877			9.46655	36.1001	0.230555	6.42234	1.15737	4.17741	16.0376	2.36562	0.0435683	211.245	70.0343		30.5607	3.28053	2.01107	31.0441	3.81476	186.621	8.8037	5.78013	7.47142	6.53812		0.657648	14.4007	4.52221	26.2761	0.0870729
Set27	35.174	38.6049	25.3164	14.7018		21.4978	20.7764	38.4968	0.863257	3.43016	7.42665	12.3101	1.19983	69.3526	7.71052	0.537117	5.03823		2.76687	300.113	266.343	9.46655	37.8822	0.208484	5.61405	1.15737	4.17741	16.0376	2.54361	0.0351795	147.759	212.423		17.757	3.64917	11.5035	25.652	2.6803	186.621	7.95833	5.51173	13.2509	40.5495		1.05943	64.9114	8.58012	48.4976	0.109511
Set28		6.43539	31.5962	31.9698		26.3399	21.9763	32.6782	0.980235	4.70088	7.59344	16.6425	6.06591	69.3526	9.64394	0.398109	5.03823	10.7767	2.76687	279.021		9.46655	37.8822	0.230555	5.83287	1.15737	2.4026	72.7446	2.311	0.0565693	221.347		408.271	17.757	3.81162	2.01107	73.1548	3.77702	115.109	7.79658	5.78013	10.254	8.21714		0.657648	14.4007	6.80712	31.0842	0.0878502
Set29	56.8385	20.3646	24.2137	18.2062		24.5217	25.1042	38.4968	0.980235	3.43016	8.46268	18.336	1.50086	173.678	8.36604	0.616071	12.3961		2.76687		84.6622	10.8238	37.8822	0.208484	3.21069	1.15737	2.4026	18.4641	1.72338	0.0251246	147.759	70.91	408.271	23.3304	4.97924	13.1838	29.2963	4.23061	231.143	8.8037	5.78013	10.254	6.53812		1.93322	19.9756	20.7604	116.483	0.0895017
Set30	45.8086	20.3646	48.1469	18.2062		26.3399	26.246	26.974	0.863257	3.43016	7.49444	7.63173	1.49295	119.883	7.33111	0.46671	10.1951		10.2107	300.113	46.7608	9.55932	36.1001	0.230555	5.83287	1.18812	4.0084	23.8984	1.26566	0.045656		317.144	1789.52	23.0654	3.81162	7.32979	31.0441	3.75541	233.102	12.1411	5.78013	8.43289	26.1098		0.408836	64.9114	6.80712	26.2761	0.0816487
Set31	251.958	20.3646	58.7114	30.1919		24.3853	22.6611	28.024	0.980235	3.43016	7.49444	16.729	1.50086	245.804	6.14125	1.01092	14.1954	10.7767	4.33957		46.7608	10.6416	36.1001	0.25409	8.91495	1.15737	4.0084	15.0673	1.26566	0.0402038		69.1586		30.5607	4.06172	2.01107	25.652	4.2666	53.7439	7.95833	5.63981	9.61248	6.53812		0.408836	21.8759	3.32539	26.2761	0.0858704
Set32	38.5003	6.43539	31.3097	30.2121		23.9359	21.9763	29.282	0.784323	3.77719	7.41104	12.3101	1.19983	183.913	8.36604	0.46671	18.6882		10.2107			10.7319		0.208484	5.83287	0.953044	4.0084	16.0376	2.41969	0.0417842		275.292		25.1286	3.28053	2.01107	48.1872	2.68945	115.109	7.79658	5.78013	10.254	39.5934		0.657648	62.6281	5.46381	38.5825	0.0733301
Set33		6.43539	42.1113	18.2062		23.5144	22.8327	33.1195	0.549093	4.78571	7.42665	7.63173	1.17614	119.353	12.426	0.477056	12.3961		9.43942		394.928	7.78599	37.8822	0.343061	8.98037	1.15737	5.18696	15.0673	1.26566	0.0453523		338.161		17.757	3.28053	2.01107	29.2963	4.23061	245.125	7.72673	5.78629	8.43289	31.7851		2.02031	14.4007	2.88527	48.4976	0.0844382
Set34	275.957	36.2953	49.5943	19.9357		26.3399	22.6611	38.4968	0.927279	3.43016	7.78447	16.9885	3.69928	173.678	6.14125	0.756352	5.03823		12.7694		46.7608	7.78599	37.8822	0.213599	5.9569	1.15737	4.66134	18.3379	2.311	0.0385853		278.466		22.7586	4.4242	7.32979	30.6617	4.2666	115.109	7.65687	8.79596	8.43289	6.53812		0.657648	40.4402	3.32539	58.0988	0.0733301
Set35	41.5916	25.0538	31.3097	28.9708		24.3853	21.9763	25.4157	0.977652	3.43016	7.46054	16.2568	1.23708	69.3526	8.28076	0.537117	14.1954	3.06696	7.22234	342.514		7.11904	37.8822	0.208484	5.83287	0.92433	5.75339	72.7446	1.26566	0.0302683	221.347	69.1586		31.6616	3.99359	8.16582	56.8627	2.70553	115.109	11.0926	5.80275	6.976	39.7328		1.51485	14.4007	4.52221	31.0842	0.0857375
Set36		6.43539	48.5531	25.6509		26.3399	20.7764	34.0896	0.784323	3.72627	7.39543	16.2568	2.1769	173.678	8.36604	0.398109	14.1954		7.83388			7.11904	37.8822	0.294582	6.42234	1.15737	4.0084	16.0376	2.12622	0.0453523	147.759	69.1586		22.7586	3.70794	10.1136	58.5222	2.70553		8.57751	5.78013	9.02068	8.21714		0.408836	14.4007	4.52221	46.0807	0.0733301
Set37	44.6829	20.3646	53.6595	29.6301		23.9359	21.9763	45.4193	0.977652	3.43016	7.42665	7.63173	1.49295	69.3526	6.49766	0.477056	18.6882		2.76687	300.113		7.11904		0.641982	11.11	1.15737	2.4026	16.8122	2.54951	0.0467243		71.9155		26.395	3.81162	2.01107	30.6617	3.39892	98.0799	8.8037	5.78013	7.45952	31.576		0.817671	14.4007	5.94457	31.0842	0.0876861
Set38	181.342	28.6497	48.5531	14.7018		23.2586	25.1042	32.4061	0.980235	4.78571	7.39543	18.336	1.49295	69.3526	6.49766	0.50709	10.1951		2.76687	325.79		7.11904		0.208484	8.98037	1.15737	2.4026	45.0385	1.26566	0.0251246		69.1586	1190.86	17.8968	3.28053	10.3488	29.2963	2.6803	268.201	7.4674	5.78013	9.61248	31.576		0.817671	17.732	5.23508	26.2761	0.0858704
Set39		20.3646	21.7895	14.7018		28.7905	21.9763	38.4968	0.977652	4.46212	7.49444	7.63173	3.69928	263.989	8.36604	0.475992	18.6882		12.7515		266.343	7.11904	37.8822	0.230555	5.2887	1.15737	8.53416	16.8122	2.42025	0.0417842		69.1586		23.3304	3.69494	2.01107	73.1548	2.72223	181.018	7.95833	5.78013	6.976	8.21714		1.80375	40.4402	3.32539	46.0807	0.0844382
Set40	251.958	6.43539	45.2074	14.7018		26.2264	22.8327	29.282	0.977652	3.43016	5.94134	12.3101	1.19983	183.913	6.49766	0.923336	14.1954	10.7767	2.76687		84.6622	9.0897	36.1001	0.213599	5.83287	1.59568	4.17741	23.8984	2.311	0.0435683	147.759	220.36	1190.86	28.2983	3.81162	5.9043	66.6309	2.6803	115.109	8.8037	5.80275	7.44762	40.8264		1.32948	40.4402	9.21028	76.8624	0.0733301
Set41	38.5003	20.3646	31.5962	35.4415		26.2264	20.7764	46.0037	0.977652	5.94591	8.07451	16.9885	5.56411	253.726	6.95962	0.616071	16.9057		10.7588		79.0718	7.11904	36.1001	0.294582	5.2887	1.15737	2.4026	18.3379	2.46969	0.0402038	221.347	220.36		23.0654	3.99359	5.9043	26.7772	2.68945		7.95833	5.79144	6.976	6.53812		1.93322	19.9756	5.69468		0.0918615
Set42	48.2912	20.3646	25.938	14.7018		22.9963	20.7764	48.3083	1.02615	5.22704	6.97391	16.2568	5.56411	173.678	6.72864	0.756352	16.9057		2.76687		46.7608	7.78599		0.213599	5.83287	1.15737	2.4026	48.3215	1.26566	0.0251246		69.1586	1190.86	23.3304	3.70794	7.32979	29.2963	2.6803	53.7439	8.57751	5.80275	10.8707	6.53812		0.657648	19.9756	4.92448	83.0284	0.0733301
Set43	46.3685	6.43539	21.7895	14.7018		22.9963	21.9505	25.4157	0.927279	5.53867	7.83397	15.897	1.50086	274.803	8.28076	0.477056	14.1954	10.7767	10.7588		46.7608	7.11904	36.1001	0.213599	5.83287	0.748717	4.48387	31.7513	1.28637	0.045656	221.347	69.1586	1190.86	27.5875	4.41164	7.32979	29.2963	3.75541	115.109	7.95833	5.79144	10.0723	8.21714		1.71384	14.4007	2.88527	31.0842	0.0864537
Set44	46.3685	20.3646	48.5531	30.2121		26.2264	21.9763	26.974	0.942191	6.06092	7.49444	16.2568	5.56411	183.383	8.28076	0.46671	10.1951		8.09591	325.79	46.7608	13.4072		0.230555	8.68369	1.15737	4.0084	16.0376	2.41969	0.0302683		164.731	1190.86	17.702	4.41072	2.01107	31.0441	5.55785	233.102	7.77747	5.63981	11.3894	8.21714		0.408836	19.9756	4.40396	88.2577	0.0844382
Set45	251.958	75.1832	41.8543	18.2062		24.3853	20.7764	39.1416	1.01846	2.76867	5.99084	16.729	1.17614	182.853	8.60957	0.398109	8.99574		12.1307	279.021		10.4735		0.343061	8.62603	1.18812	5.4126	43.9437	1.83219	0.0749466		69.1586	1789.52	25.1286	3.70794	7.29413	30.6617	5.08892	231.932	7.79658	5.78013	8.43289	6.53812		0.408836	19.9756	3.32539	46.0807	0.0733301
Set46	36.8207	6.43539	48.1469	39.1494		21.4978	23.7044	29.282	1.0501	4.7652	7.49444	15.897	7.51998	253.726	3.99419	0.537117	10.1951		13.6864		84.6622	7.11904		0.294582	8.81237	1.15737	4.17741	15.0673	1.78833	0.0543341	147.759	70.91		27.615	4.06172	2.01107	29.2963	4.2666	53.7439	8.57751	5.78013	8.43289	41.0581		0.817671	19.9756	5.69468	73.1132	0.0870729
Set47	35.174	25.0538	48.5531	30.1919		24.5801	22.8749	32.7659	0.982369	3.43016	5.99084	16.729	1.17614	267.18	8.36604	0.398109	10.1951	10.7767	8.85429		46.7608	7.78599	37.8822	0.294582	8.68369	1.18812	2.4026	68.5938	2.38646	0.0302683	147.759	70.0343	1789.52	30.5607	3.99359	2.01107	48.1872	4.2666	80.9232	2.95501	5.80275	6.976	22.0189		0.408836	62.6281	2.88527	88.2577	0.0858704
Set48	45.8086	28.7192	57.0274	14.7018		26.2264	20.7764	61.738	0.549093	3.72627	8.0618	38.0969	1.49295	183.913	5.30405	0.853231	14.1954	10.7767	10.7588		46.7608	10.7319	36.1001	0.213599	10.5534	0.748717	4.48387	15.0673	1.28637	0.0251246	147.759	70.91		24.5768	3.64917	8.6506	25.652	4.23061	53.7439	7.79658	5.78013	10.0723	8.21714		2.02031	21.8759	9.56959	108.322	0.0864537
Set49		28.6497	21.7895	14.7018		22.9963	20.7764	32.3979	1.158	3.43016	8.28544	16.2568	1.50086	69.3526	9.64394	0.398109	16.3865		11.6778	300.113	79.0718	10.7319	36.1001	0.208484	8.68369	1.15737	4.17741	16.0376	1.26566	0.0251246	147.759	70.0343		23.3304	3.64917	2.01107	29.2963	2.6803	181.018	7.44635	5.63981	10.0723	8.21714		0.408836	19.9756	4.40396	38.5825	0.0733301
Set50	48.2912	28.6497	48.5531	18.2062		26.3399	21.9505	33.2478	1.158	5.53867	8.98767	15.897	1.17614	69.3526	6.14125	0.398109	16.7948	10.7767	2.76687	279.021	46.7608	9.01195	39.3233	0.25409	9.40025	1.58113	2.4026	16.8122	1.28637	0.0453523		70.91		23.0654	3.70794	6.9524	56.8627	3.91301	53.7439	7.95833	6.10755	6.976	31.576		1.93322	19.9756	4.92448	31.0842	0.0858704
Set51	29.3093	20.3646	31.5962	18.2062		26.2264	21.9763	16.2027	0.977652	3.43016	8.07451	16.729	5.56411	178.796	10.9182	0.398109	18.6347		4.17057			12.1528	36.1001	0.294582	5.9569	1.15737	20.0161	53.0703	2.54361	0.0251246		69.1586		30.5607	3.81162	2.01107	30.6617	3.77702	53.7439	7.65687	5.63981	10.8707	26.1098		0.817671	14.4007	4.52221	26.2761	0.0852649
Set52	43.98	6.43539	21.7895	14.7018		29.248	25.4361	34.0896	0.977652	3.43016	8.98767	16.2568	3.69928	69.3526	6.02126	0.398109	10.1951	10.7767	13.0152		46.7608	9.55932	37.8822	0.213599	5.83287	1.46491	4.17741	18.4641	2.42025	0.0302683		269.925		17.8968	3.80381	2.01107	30.6617	4.23061	186.621	7.79658	6.3335	6.976	8.21714		0.657648	19.9756	3.32539	93.9337	0.17721
Set53	46.3685	6.43539	21.7895	26.592		25.2309	23.7044	28.024	1.00426	3.43016	4.38824	16.2568	1.50086	173.678	5.1065	0.537117	10.1951	10.7767	11.6778	279.021	84.6622	9.46655	37.8822	0.230555	8.68369	0.748717	4.17741	15.0673	1.26566	0.0302683	221.347	171.69	1190.86	17.8968	4.41164	7.32979	56.8627	2.70553	282.847	7.79658	5.78013	6.976	22.0189		0.657648	19.9756	2.88527	26.2761	0.0844382
Set54	44.6829	38.6049	22.4613	18.2062		24.5801	21.9763	29.282	0.942191	3.43016	7.49444	15.897	5.58206	69.3526	3.40529	0.477056	10.1951		12.1307	279.021		7.11904		0.213599	8.96992	1.15737	4.0084	34.0688	2.36562	0.0251246	147.759			17.8968	4.03662	7.32979	29.2963	2.70553	115.109	7.79658	5.63981	7.45952	22.0189		0.657648	19.9756	5.46381	26.2761	0.0844382
Set55	57.7998	25.8976	59.4655	30.1919		22.9963	25.4361	28.024	0.977652	5.50261	7.49444	16.6425	1.17614	69.3526	10.4495	0.477056	10.1951		4.17057	279.021		9.46655	39.3233	0.374761	8.68369	0.953044	4.48387	23.8984	1.26566	0.0507678		69.1586	1190.86	26.395	3.28053	2.01107	29.2963	4.23061	53.7439	11.7677	6.63797	10.0723	27.6427		0.657648	14.4007	5.46381	26.2761	0.0733301
Set56		28.6497	62.7766	14.7018		26.2264	23.7044	33.2478	0.927279	3.43016	8.98767	16.2568	1.17614	253.726	7.21268	0.477056	14.1954	10.7767	2.76687			7.11904		0.213599	5.61405	0.748717	8.00254	23.8984	2.5686	0.0251246	221.347	171.69	408.271	21.0022	3.70794	2.01107	29.2963	2.70553	53.7439	8.8037	5.78013	6.976	6.53812		1.53865	14.4007	2.88527	93.9337	0.0870369
Set57		6.43539	35.5613	18.2062		29.248	22.6611	28.024	0.980235	3.43016	7.49444	7.63173	6.06591	69.3526	6.14125	0.398109	22.6832	10.7767	8.85429		394.928	9.55932	37.8822	0.208484	5.83287	0.953044	4.17064	23.8984	2.6032	0.0351795	211.245	69.1586		34.1742	3.77153	10.1136	30.6617	3.81476	53.7439	7.65687	5.63981	5.10641	8.21714		1.91179	14.4007	5.46381	88.2577	0.0876861
Set58		6.43539	88.106	27.2075		22.9963	21.9763	33.1195	0.977652	3.72627	7.49444	16.729	1.17614	119.353	5.30405	0.46671	18.6347	10.7767	4.33957	279.021		9.55932	68.1206	0.208484	5.83287	0.92433	4.17741	15.0673	2.42025	0.0351795	221.347	69.1586	408.271	28.2983	4.41072	5.9043	73.1548	4.23061	53.7439	11.7677	5.78013	8.43289	27.6427		2.06955	62.6281	6.80712	58.4128	0.0870729
Set59	35.174	20.3646	21.7895	14.7018		26.3399	23.7044	33.841	1.158	5.22704	7.46054	7.63173	4.74873	69.3526	9.64394	0.398109	12.3961		9.43942			7.78599		0.208484	8.91495	1.46491	4.98034	32.291	1.26566	0.0302683	147.759	164.731	408.271	23.3304	3.99359	7.14109	98.4406	5.08892	179.624	8.57751	5.63981	10.7653	31.7851		3.02855	19.9756	2.88527	26.2761	0.0733301
Set60	29.3093	26.4087	21.7895	14.7018		26.3399	20.7764	37.0138	0.549093	5.38904	7.87026	12.3101	1.19983	126.633	7.21268	0.616071	5.03823		2.76687	279.021	79.0718	7.11904	36.1001	0.230555	3.21069	0.92433	4.48387	24.0335	1.28637	0.0351795	147.759	69.1586		25.1286	4.27732	7.32979	83.7044	2.6803	231.932	8.57751	5.63981	9.02068	31.7851		0.817671	14.4007	2.88527	52.2467	0.0844382
Set61	48.2912	38.6049	21.7895	35.491		23.5144	23.7044	33.1195	1.01846	1.4214	7.59344	16.2568	3.69928	69.3526	9.64394	0.616071	18.6347		11.6778	342.514		7.78599	37.8822	0.208484	5.83287	1.31343	16.3576	23.8984	2.6303	0.0251246	221.347	69.1586	1190.86	26.395	3.64917	5.9043	29.2963	3.81476	53.7439	7.79658	5.78629	6.976	28.3715		0.408836	14.4007	4.76429	26.2761	0.0733301
Set62	114.816		42.1696	14.7018		31.1557	26.246	33.1195	0.977652	5.22704	7.49444	17.5325	1.23708	259.558	6.14125	0.50709	14.2625		4.17057		46.7608	9.55932		0.294582	3.21069	1.15737	5.61221	49.0132	1.26566	0.0402038	147.759		408.271	17.757	3.81162	6.9524	66.6309	5.42564	53.7439	7.44635	5.80275	10.254	31.576		1.71384	21.8759	7.95271	76.0162	0.0878502
Set63	41.5916	20.3646	31.3097	18.2062		21.4978	22.6611	34.0896	0.980235	3.72627	7.49444	7.63173	1.19983	323.19	6.14125	0.477056	10.1951		10.7588			9.01195		0.208484	7.32029	1.15737	2.4026	63.8064	2.54361	0.0417842		220.36	1789.52	17.8968	3.05974	7.32979	31.0441	2.72223	231.143	10.0265	5.78629	6.976	6.53812		0.408836	62.6281	5.69468	108.322	0.109511
Set64	42.4344	20.3646	21.7895	34.5342		23.2597	22.8327	28.024	0.942191	5.75321	7.91977	23.7059	1.17614	69.3526	7.78936	0.756352	14.1954		2.76687			10.1156	36.1001	0.213599	9.396	1.4506	5.75339	16.0376	2.311	0.045656	211.245	69.1586		27.6849	4.98074	2.01107	30.6617	2.6803	181.018	7.65687	8.36396	10.8707	8.21714		0.408836	14.4007	5.46381	88.2577	0.0733301
Set65	181.342	37.9099	21.7895	14.7018		21.9528	22.8327	38.4968	1.158	4.70088	7.46054	7.63173	1.50086	69.3526	9.98064	0.50709	19.3977		2.76687	300.113	266.343	7.11904	36.1001	0.213599	6.42234	1.18812	4.98034	10.7516	1.26566	0.0351795		220.36		23.3304	4.41164	7.29413	66.6309	4.96656	53.7439	7.77747	5.79144	7.45952	31.7851		0.408836	40.4402	3.32539		0.0733301
Set66	44.6829		41.8543	18.2062		21.4978	21.9505	44.9554	1.26295	3.72627	5.42082	16.2568	1.49295	182.853	7.68584	0.756352	14.1954		4.33957			7.78599		0.208484	5.83287	1.15737	4.0084	43.9437	2.24424	0.0417842		220.36	408.271	17.702	3.99359	6.9524	25.652	2.6803	115.109	10.0265	5.63981	7.47142	8.21714		0.408836	21.8759	3.32539	76.0162	0.0733301
Set67	43.98	6.43539	48.9698	14.7018		21.4978	21.9763	46.0037	0.927279	3.43016	7.59344	12.3101	1.19983	119.883	8.36604	0.616071	5.03823		2.76687	279.021		9.46655	37.8822	0.343061	3.21069	1.15737	4.0084	24.0335	2.55123	0.0351795	147.759	69.1586	1789.52	17.702	3.81162	7.17526	30.6617	2.6803	188.202	7.95833	6.16914	9.61248	26.1098		0.817671	71.472	4.40396		0.0844382
Set68	35.174	33.4449	48.5531	30.1919		23.2586	23.7044	29.282	0.980235	3.43016	7.49444	16.2568	1.49295	259.558	8.0922	0.756352	10.1951		10.2107			9.47711	39.3233	0.343061	5.83287	1.18812	4.48387	23.8984	2.54361	0.0433572	147.759	71.9155		27.5875	3.28053	13.16	29.2963	2.6803	231.932	8.57751	5.63981	9.61248	31.576		1.32948	19.9756	2.88527	88.2577	0.0844382
Set69	181.342	33.4449	22.4613	14.7018		19.2797	26.8784	32.6782	0.927279	3.43016	8.07451	12.3101	1.19983	182.853	6.14125	0.398109	10.1951	10.7767	11.6778		46.7608	7.78599	37.8822	0.208484	5.9569	1.18812	4.0084	23.8984	2.54951	0.0351795	147.759	69.1586		17.702	5.01382	5.9043	30.6617	2.6803	115.109	8.57751	8.70008	6.976	26.1098		0.408836	71.472	7.19645	38.5825	0.0733301
Set70	37.8389	20.3646	47.6799	14.7018		26.3399	22.8327	34.0896	0.863257	3.77719	7.42665	25.2613	1.17614	182.853	7.84858	0.398109	5.03823		2.76687		266.343	7.78599	36.1001	0.213599	5.2887	1.15737	4.48387	15.0673	1.26566	0.0402038		250.664		17.702	3.99359	2.01107	48.1872	4.2666	231.932	7.95833	5.63981	8.43289	6.53812		1.80375	65.191	4.92448	26.2761	0.0864537
Set71		36.7565	21.7895	14.7018		23.9359	26.1852	46.0037	1.158	4.70088	7.49444	16.9885	1.49295	69.3526	7.92492	0.50709	5.03823		2.76687	325.79		9.46655		0.764349	5.83287	1.18812	4.0084	16.0376	2.36562	0.0543341		212.423	408.271	25.1286	3.81162	2.01107	31.0441	2.6803	53.7439	7.95833	5.79144	7.45952	6.53812		0.408836	19.9756	4.40396	76.0162	0.0844382
Set72	45.8086	37.4648	47.6799	31.2074		23.5144	18.7967	32.3979	0.850156	4.78571	7.41104	7.63173	4.74873	274.803	14.545	0.616071	16.9108	10.7767	15.132		46.7608	7.78599	39.3233	0.213599	5.83287	1.15737	4.0084	18.4641	2.36562	0.0302683		69.1586	1190.86	31.6616	4.87634	7.32979	56.8627	5.56536	53.7439	8.8037	6.3335	6.976	6.53812		1.71384	62.6281	9.21028	83.0284	0.0870729
Set73	44.6829	28.6497	24.2137	14.7018		22.9963	22.8327	34.0896	0.971162	3.72627	7.59344	7.63173	1.17614	173.678	8.60957	0.395367	10.1951		4.33957		46.7608	11.2212		0.294582	3.21069	0.748717	4.0084	18.3379	1.28637	0.0543341	147.759	171.69		17.757	3.81162	7.32979	29.2963	2.6803	183.807	7.65687	5.78629	7.45952	8.21714		0.408836	40.4402	2.88527	26.2761	0.0857375
Set74	35.174	33.4449	24.2137	14.7018		23.9359	21.9763	33.1195	1.01846	3.43016	7.59344	16.2568	1.29945	173.678	8.36604	0.477056	10.1951		7.22234	300.113		7.11904	36.1001	0.208484	8.91495	0.953044	2.4026	27.3477	2.311	0.045656	147.759	69.1586	1190.86	22.7586	3.99359	6.9524	66.6309	3.55941		7.75641	5.80275	9.61248	26.1098		2.41205	62.6281	4.40396	88.2577	0.0870369
Set75		28.7192	21.7895	19.9357		11.973	22.8327	29.282	0.863257	3.43016	7.59344	16.2568	1.17614	119.353	8.60957	0.398109	10.1951		2.76687			10.7171		0.208484	5.83287	1.18812	2.4026	32.291	2.64937	0.0385853	211.245	70.0343		27.6849	3.81162	5.9043	25.652	4.23061	115.109	7.79658	8.96632	7.47142	6.53812		0.817671	70.6365	4.52221	26.2761	0.0895017
Set76	35.174	20.3646	21.7895	18.2062		28.7905	20.7764	39.8408	0.977652	5.13144	7.49444	19.2444	1.49295	69.3526	7.68584	0.398109	19.7771		7.14862			9.46655		0.208484	8.91495	0.748717	5.61221	15.0673	2.55043	0.0467243	211.245	70.91		17.702	3.89137	6.9524	25.652	3.81476	115.109	7.95833	5.79144	8.43289	8.21714		1.05943	40.4402	4.40396	38.5825	0.0895017
Set77	35.174	20.3646	41.8543	19.9357		23.5144	21.9763	49.1357	0.971162	3.43016	5.21587	16.2568	3.69928	126.633	3.40529	0.398109	19.0347		4.17057	279.021	79.0718	7.78599	37.8822	0.470466	5.83287	1.15737	4.17741	23.8984	2.28896	0.0671363		317.144		17.757	3.70794	7.29413	48.1872	4.96656	53.7439	7.79658	5.51173	6.976	31.7851		0.817671	14.4007	4.40396	44.7485	0.0733301
Set78	46.3685	26.4087	48.1469	14.7018		21.4978	26.0828	44.9554	0.942191	3.43016	7.59344	15.897	1.17614	69.3526	6.72864	0.923336	14.1954	10.7767	2.76687		46.7608	7.78599	36.1001	0.294582	5.83287	1.15737	4.66134	23.8984	1.28637	0.0251246		71.9155	408.271	17.757	3.70794	2.01107	58.5222	3.39892	181.018	8.8037	5.78013	10.0723	6.53812		0.408836	21.8759	2.88527	38.5825	0.0733301
Set79	41.5916	51.9164	24.2137	36.7476		26.2264	20.7764	26.974	1.02615	3.72627	8.98767	12.3101	1.19983	69.3526	6.49766	0.46671	8.99574		7.22234	279.021		7.78599	36.1001	0.294582	8.68369	0.748717	5.4126	47.7364	2.311	0.045656		212.423		27.6849	4.06172	7.32979	73.1548	3.55941	83.712	7.95833	5.78013	6.976	27.6427		0.817671	19.9756	6.80712	88.2577	0.0882693
Set80	124.325		48.5531	27.2075		24.2355	22.6611	39.1416	1.02615	3.43016	7.49444	7.63173	1.19983	259.558	8.60957	0.616071	12.3961		4.33957			10.8238		0.294582	6.42234	0.748717	5.24327	53.0703	1.28637	0.0435683		70.0343	1190.86	17.8968	4.27732	5.9043	30.6617	2.70553	53.7439	10.7549	5.63981	9.61248	36.0389		0.646661	73.7341	5.94457	93.9337	0.0844382
Set81	41.5916	28.7192	30.8685	30.2121		24.5217	21.9763	16.2027	0.977652	3.72627	6.45339	12.3101	1.19983	119.883	7.71052	0.398109	14.1954		12.7515	279.021	46.7608	7.78599	39.3233	0.208484	3.21069	1.56506	4.66134	45.0385	1.85087	0.0351795		69.1586		22.7586	5.62216	5.9043	66.6309	3.55941	53.7439	7.79658	5.78013	10.0723	37.6258		0.408836	19.9756	3.32539	58.4128	0.0864537
Set82	35.174	28.7192	31.5962	14.7018		21.4978	20.7764	32.9922	1.12612	3.72627	7.59344	16.2568	1.17614	253.726	3.99419	1.05585	10.1951	10.7767	2.76687			7.78599	39.3233	0.208484	8.62603	0.748717	4.48387	41.0638	1.28637	0.0565693		212.423	1190.86	17.702	3.70794	7.29413	48.1872	2.72223	53.7439	7.75641	6.3335	8.43289	27.6427		1.71384	62.6281	4.52221	83.0284	0.0733301
Set83	275.957	6.43539	48.5531	30.1919		22.9963	21.9763	29.282	0.850156	3.43016	7.42665	24.1388	1.49295	69.3526	3.99419	0.398109	10.1951	10.7767	7.22234	359.238	46.7608	9.51294	36.1001	0.427333	5.83287	1.40399	4.0084	61.5021	2.6032	0.0402038	147.759	69.1586	1190.86	27.5875	4.58302	10.1136	66.6309	2.6803	115.109	16.82	5.78013	7.47142	8.21714		1.53865	19.9756	4.52221	108.322	0.079833
Set84	35.174	6.43539	31.5962	31.2074		23.5144	26.246	34.0896	0.850156	3.43016	8.19155	7.63173	1.17614	221.206	7.33111	0.537117	12.3961		4.33957		79.0718	12.1528	39.3233	0.359521	5.83287	0.92433	6.82496	16.8122	1.26566	0.0433572		287.006	1789.52	22.7586	3.70794	2.01107	25.652	4.2666	53.7439	11.7677	5.63981	7.47142	31.576		0.408836	14.4007	3.32539	26.2761	0.0870369
Set85	44.6829	6.43539	25.3164	14.7018		24.507	22.8327	34.0896	0.850156	3.43016	7.49444	16.2568	1.23708	259.558	9.64394	0.679316	12.3961		2.76687			7.78599	37.8822	0.230555	3.21069	0.748717	4.98034	16.0376	2.54951	0.0302683		220.36	1190.86	24.5768	3.99359	2.01107	63.2736	5.18658	268.201	8.8037	6.3335	8.58981	27.6427		1.32948	14.4007	5.00636	88.2577	0.0737956
Set86	46.3685	28.7192	65.1262	18.2062		22.0102	20.7764	34.0896	1.158	4.43494	7.39543	15.897	1.50086	126.633	3.40529	0.756352	14.1954		4.33957	279.021		7.78599		0.427333	5.2887	0.748717	4.0084	16.0376	2.54951	0.0417842	221.347	70.91	1190.86	23.3304	3.70794	2.01107	66.1534	5.39116	115.109	11.0926	6.10755	7.47142	31.576		0.408836	14.4007	6.80712	46.0807	0.0870369
Set87	44.6829	20.3646	31.3097	14.7018		23.5144	22.8327	33.1195	0.977652	3.86287	7.39543	16.2568	1.17614	69.3526	8.60957	0.398109	14.1954		2.69315		79.0718	7.90013		0.208484	5.83287	0.92433	5.75339	72.7446	2.34467	0.0251246		69.1586	1190.86	23.3304	3.64917	2.01107	29.2963	5.55785	115.109	7.79658	5.78013	10.0723	8.21714		0.646661	21.8759	3.32539	58.0988	0.0858704
Set88	38.5003	60.267	21.7895	14.7018		11.973	21.9763	33.1195	0.942191	3.43016	8.46268	12.3101	1.19983	178.796	8.28076	0.724461	21.584		13.0007			7.78599	39.3233	0.294582	5.83287	0.92433	5.75339	16.0376	1.26566	0.0417842	147.759	70.91		25.1286	3.99359	2.01107	56.8627	3.75541	177.672	7.65687	5.78013	7.45952	26.1098		0.817671	66.3359	5.63794	48.4976	0.0733301
Set89	41.5916	6.43539	21.7895	18.2062		22.9963	20.7764	46.0037	0.980235	3.72627	7.73497	16.9885	5.58206	69.3526	7.21268	0.477056	14.2625		7.69442	325.79	46.7608	7.78599		0.230555	3.21069	1.56506	4.17741	47.7364	1.26566	0.0351795	259.984	164.731		22.7586	3.99359	9.66449	30.6617	3.75541	282.847	7.79658	5.51173	7.47142	31.576		0.657648	62.6281	2.88527	58.4128	0.0844382
Set90		20.3646	48.1469	30.2121		22.9963	18.7967	32.6782	0.942191	4.7652	8.98767	12.3101	1.19983	183.383	6.14125	0.398109	14.1954		11.6778		79.0718	7.78599		0.208484	5.9569	1.15737	4.48387	41.0638	2.46969	0.0925765		71.9155	1190.86	17.757	4.58302	2.01107	76.5999	2.6803	115.109	8.91785	5.80275	9.02068	8.21714		0.408836	65.191	3.32539	88.2577	0.0844382
Set91	35.174	33.4449	21.7895	18.2062		26.3399	20.7764	32.4061	0.980235	3.43016	7.49444	16.2568	8.69815	119.353	13.031	0.46671	17.1811		7.22234	279.021		10.688		0.208484	5.83287	1.15737	8.63926	16.8122	1.28637	0.0302683		69.1586		34.1742	3.84608	7.14109	29.2963	3.75541	115.109	8.8037	6.54667	7.47142	6.53812		1.05943	14.4007	6.66849	58.4128	0.0733301
Set92	35.174	20.3646	46.8896	31.2074		28.7905	21.9763	29.282	0.977652	5.49408	7.39543	7.63173	1.49295	119.353	6.14125	0.756352	15.6379		7.22234	279.021		9.01195		0.374761	6.42234	1.15737	4.0084	27.3477	1.26566	0.0251246		220.36	1789.52	28.0829	3.99359	7.29413	30.6617	2.6803	53.7439	8.91785	5.63981	7.47142	6.53812		0.408836	19.9756	5.46381	88.2577	0.0733301
Set93	38.5003	33.4449	31.3097	30.2121		26.2092	21.9763	34.0896	0.927279	2.76867	7.59344	15.897	1.17614	182.853	6.02126	0.616071	10.1951		11.6778		46.7608	7.11904		0.230555	5.83287	0.748717	5.08365	44.1707	1.26566	0.0402038			408.271	17.757	3.75932	2.01107	30.6617	2.72223	231.932	8.57751	6.54667	10.0723	40.8264		1.71384	14.4007	3.32539	26.2761	0.0733301
Set94		6.43539	24.2137	18.2062		21.4978	21.9763	46.0037	1.12612	3.72627	8.07451	17.5325	1.50086	126.633	7.22734	0.576594	5.03823		4.33957	279.021		11.2375	39.3233	0.230555	8.98037	1.15737	12.2697	16.8122	2.28896	0.0417842		71.9155		21.0022	4.06172	5.9043	29.2963	3.39892	245.125	7.75641	5.51173	6.976	8.21714		0.408836	14.4007	3.32539	83.0284	0.0733301
Set95	37.8389	6.43539	57.0274	35.0315		21.4978	20.7764	41.4243	0.971162	3.72627	7.49444	23.7059	1.17614	245.804	6.95962	0.537117	14.1954		10.2107			9.55932		0.213599	3.21069	0.92433	4.17741	18.4641	2.12622	0.0565236		69.1586		25.1286	4.84462	5.9043	31.0441	2.6803	53.7439	8.57751	4.72465	6.976	27.6427		0.657648	62.6281	3.32539	38.5825	0.0733301
Set96	46.3685	6.43539	48.5531	14.7018		31.2151	23.7044	38.4968	0.977652	4.70088	7.49444	16.729	1.17614	173.678	7.21268	0.46671	5.03823		4.17057			7.78599		0.230555	8.68369	0.92433	5.4126	54.0827	2.42025	0.0302683	221.347	69.1586	1190.86	17.8968	4.4242	7.14109	25.652	2.72223	282.847	7.79658	6.16914	10.4431	27.6427		0.408836	62.6281	5.69468	46.0807	0.0878502
Set97	35.174	37.9099	48.1469	14.7018		24.2355	20.7764	38.4968	0.549093	2.76867	8.98767	16.2568	3.69928	183.913	12.426	0.616071	10.1951		8.85429		266.343	9.23925	39.3233	0.208484	8.81237	1.40399	4.98034	32.291	2.54361	0.0565236		70.91		22.7586	3.28053	2.01107	29.2963	5.08892	181.018	7.87746	5.63981	8.58981	40.5495		0.657648	19.9756	7.5422	93.9337	0.0733301
Set98	35.174	6.43539	42.1696	30.1919		26.2264	18.7967	49.045	1.21857	3.43016	5.21587	15.897	1.17614	183.913	6.14125	0.616071	14.1954	10.7767	10.2107			7.11904		0.294582	5.83287	1.18812	4.0084	16.8122	1.28637	0.0251246	211.245	275.292		23.0654	4.87634	6.9524	25.652	5.55785		7.75641	5.63981	6.976	6.53812		0.817671	14.4007	3.32539	52.2467	0.109511
Set99	57.7998	6.43539	31.3097	18.2062		23.9359	22.6611	32.2555	0.977652	3.43016	8.46268	16.9885	1.49295	182.853	7.78936	0.616071	10.1951	10.7767	11.6778			7.11904	36.1001	0.208484	5.83287	0.92433	4.0084	46.4113	2.311	0.045656	147.759		408.271	27.6849	3.05974	5.9043	29.2963	3.91301	89.2895	7.95833	5.63981	8.43289	6.53812		0.408836	40.4402	3.32539	83.0284	0.0895017
Set100	251.958	36.2953	45.2074	19.9357		26.2264	20.7764	28.024	0.980235	4.70088	7.49444	16.2568	1.17614	69.3526	8.36604	0.398109	5.03823		10.2107		79.0718	9.55932	39.3233	0.343061	10.001	0.92433	4.48387	16.0376	1.26566	0.0417842		69.1586		23.3304	3.99359	10.7939	29.2963	2.70553	53.7439	7.65687	5.78013	8.58981	26.1098		0.657648	17.732	3.32539	81.7814	0.0844382
Set101	38.5003	20.3646	21.7895	30.1919		26.3399	21.9763	29.282	0.977652	3.43016	6.45339	7.63173	1.49295	121.515	5.30405	0.616071	14.1954		4.33957	279.021		7.11904	36.1001	0.25409	8.62603	0.748717	4.49711	23.8984	1.83219	0.0402038	147.759	70.0343		24.5768	3.84608	2.01107	30.6617	2.6803	115.109	10.7549	6.63797	8.43289	37.6258		0.657648	53.5555	4.40396	83.0284	0.0733301
Set102	67.3085	26.4087	48.5531	14.7018		26.3399	20.7764	33.1195	0.942191	3.43016	7.39543	16.0853	1.23708	178.796	7.78936	0.398109	5.03823		2.76687	279.021		9.46655	36.1001	0.208484	5.2887	1.15737	2.4026	16.8122	1.28637	0.0351795	147.759	71.9155	408.271	17.8968	4.06172	7.32979	30.6617	2.6803	53.7439	12.0446	6.3335	6.976	8.21714		0.408836	62.6281	4.40396	75.305	0.0864537
Set103	171.633	26.4087	41.8543	18.2062		26.3399	20.7764	29.282	1.02615	3.43016	8.2461	7.63173	1.19983	173.678	8.19097	0.398109	12.3961		8.85429		46.7608	7.78599	37.8822	0.208484	5.9569	1.15737	4.81939	23.8984	2.36562	0.0351795		69.1586		17.757	3.64917	2.01107	29.2963	4.23061	115.109	7.79658	5.80275	8.43289	6.53812		1.57553	14.4007	4.52221	38.5825	0.0733301
Set104	251.958	20.3646	21.7895	34.968		22.9963	25.1042	31.2159	0.850156	4.78571	7.39543	7.63173	3.69928	119.353	8.60957	0.50709	14.1954	10.7767	4.17057	279.021	46.7608	7.78599	37.8822	0.641982	8.91495	0.748717	5.75339	41.0638	1.26566	0.0402038		70.91	408.271	26.395	3.28053	7.32979	29.2963	3.55941	115.109	10.0265	5.80275	8.58981	27.6427		2.45342	62.6281	8.64443	38.5825	0.0876861
Set105	35.174	20.3646	48.5531	18.2062		23.9359	20.7764	38.4968	0.863257	3.72627	7.49444	12.3101	1.19983	178.796	6.95962	0.477056	14.1954		4.17057			9.55932		0.208484	5.83287	0.953044	2.4026	43.9437	1.26566	0.0351795	147.759	212.423		26.395	3.84608	10.7939	80.9243	2.68945	53.7439	8.8037	6.3335	10.0723	8.21714		2.06332	40.4402	2.88527	88.2577	0.0870369
Set106	35.174	20.3646	47.6799	18.2062		23.5144	26.0828	34.0896	0.980235	4.78571	8.07451	15.897	1.23708	69.3526	6.14125	0.756352	14.2625	10.7767	10.7588	374.165	46.7608	9.55932		0.208484	6.42234	1.15737	4.48387	79.0849	1.26566	0.0351795		220.36		30.5607	3.70794	2.01107	30.6617	3.39892	231.932	7.66008	5.80275	8.43289	6.53812		3.02855	14.4007	3.32539	26.2761	0.0733301
Set107		6.43539	26.4191	14.7018		23.5144	21.9763	32.6782	0.982369	3.72627	8.07451	12.3101	1.19983	69.3526	8.28076	0.398109	14.1954		2.76687	279.021	84.6622	12.1198	36.1001	0.213599	8.62603	0.92433	4.17741	43.9437	2.6032	0.0351795	164.279	69.1586		31.0372	3.64917	6.9524	31.0441	4.23061	282.847	7.65687	6.3335	11.9094	6.53812		0.408836	14.4007	3.32539	46.0807	0.0733301
Set108	251.958		21.7895	14.7018		26.3399	22.6611	38.4968	0.977652	3.43016	7.49444	16.729	4.74873	55.853	8.28076	0.477056	14.2625		2.76687		266.343	7.11904	37.8822	0.213599	3.21069	0.748717	10.1917	16.0376	2.12622	0.0417842	147.759	69.1586		17.757	4.06172	2.01107	30.6617	2.6803	53.7439	7.79658	5.78013	10.0723	6.53812		1.93322	66.3359	7.19645	38.5825	0.0844382
Set109		6.43539	48.1469	29.6301		26.2264	18.7967	16.2027	1.07547	3.43016	8.46268	16.2568	1.23708	69.3526	6.02126	0.537117	5.03823		2.76687	359.238	84.6622	9.46655	37.8822	0.208484	3.21069	1.18812	2.4026	16.0376	1.54893	0.045656		69.1586	1758.63	25.1286	3.99359	2.01107	66.6309	2.68945	231.932	8.57751	5.78013	7.47142	31.7851		0.408836	71.472	4.76429	38.5825	0.0864537
Set110	275.957	20.3646	31.3097	30.2121		24.3853	20.7764	34.0896	1.01846	3.43016	7.39543	15.897	1.49295	69.3526	7.21268	0.616071	14.1954	10.7767	2.76687		84.6622	9.46655	37.8822	0.208484	8.68369	1.15737	4.98034	27.3477	2.42025	0.0351795	147.759	212.423		17.757	3.70794	6.9524	63.2736	2.70553	75.2944	8.08753	5.78013	5.10641	36.8886		1.71384	62.6281	4.40396	58.4128	0.0844382
Set111	48.2912	6.43539	24.2137	14.7018		24.5801	21.9763	35.2762	0.863257	1.4214	8.30485	16.2568	1.49295	182.853	7.71052	0.616071	10.1951		2.76687		46.7608	9.55932	37.8822	0.294582	5.83287	1.3919	4.48387	24.0335	2.42025	0.0302683	211.245	71.9155		17.757	3.70794	2.01107	29.2963	3.75541	115.109	8.57751	4.72465	7.44762	6.53812		1.71384	17.732	5.69468	48.4976	0.0737956
Set112		33.4449	31.3097	18.2062		24.3853	21.9763	34.0896	0.980235	4.79185	6.77767	16.6425	1.50086	323.19	6.14125	0.686211	14.1954		8.85429		79.0718	7.11904	36.1001	0.294582	5.83287	0.748717	2.4026	23.8984	1.83219	0.0351795	211.245	69.1586		22.7586	3.84608	10.1136	66.6309	3.77702	268.201	10.7549	5.80275	8.58981	6.53812		2.02031	40.4402	13.1218	31.0842	0.0844382
Set113	251.958	28.7192	31.5962	14.7018		24.5801	20.7764	33.1195	0.977652	3.86287	8.98767	16.2568	1.49295	245.804	6.14125	0.398109	14.1954	10.7767	2.76687		46.7608	7.11904	36.1001	0.470466	5.2887	1.18812	2.4026	24.0335	1.26566	0.045656		220.36	408.271	21.0022	3.70794	2.01107	29.2963	5.18658	53.7439	7.75641	5.78013	10.3087	6.53812		0.817671	53.5555	2.88527	31.0842	0.0858704
Set114	45.2487	6.43539	31.5962	18.2062		23.9359	22.8749	29.282	0.980235	5.67562	7.83397	16.6425	1.50086	121.515	7.71052	0.50709	16.7948		12.7694			7.78599		0.208484	5.83287	0.953044	4.66134	31.7513	1.26566	0.0351795		70.0343		31.6616	3.99359	2.01107	30.6617	3.55941	179.624	7.72673	5.63981	9.02068	27.6427		0.408836	62.6281	4.40396	58.4128	0.0733301
Set115	35.174	6.43539	21.7895	31.0361		26.2264	22.6611	46.0037	0.980235	3.72627	8.2461	16.729	1.49295	69.3526	8.28076	0.537117	10.1951		11.6778			9.46655	36.1001	0.294582	8.96992	1.15737	12.2697	16.8122	1.26566	0.0351795	221.347	171.69	1789.52	17.8968	4.06172	2.01107	29.2963	2.70553	53.7439	7.95833	5.79144	7.47142	27.6427		0.657648	53.5555	4.92448		0.0870369
Set116	181.342		21.7895	18.2062		12.6016	27.0558	33.841	0.982369	3.72627	7.39543	7.63173	1.23708	259.558	8.54958	0.686211	15.6379	10.7767	4.17057			7.11904		0.294582	3.21069	0.748717	4.0084	16.0376	1.26566	0.0402038	147.759	171.69	1190.86	26.395	3.84608	2.01107	30.6617	5.30201	75.2944	7.66008	6.2988	7.47142	36.0389		1.32948	14.4007	2.88527	46.0807	0.0864537
Set117	35.174	36.4746	48.1469	18.2062		22.9963	20.7764	29.282	0.784323	3.43016	7.42665	16.9885	1.73818	178.796	9.64394	0.395367	5.03823		10.2107			7.11904	37.8822	0.294582	5.9569	0.92433	4.17741	16.0376	2.54361	0.0402038	221.347	70.91	408.271	35.1854	3.28053	2.01107	76.5999	3.91301	53.7439	7.65687	5.51173	7.44762	6.53812		0.657648	19.9756	2.88527	46.0807	0.0844382
Set118	275.957	90.9033	47.6799	30.2121		23.9359	21.9763	32.2555	1.01063	3.72627	8.98767	29.2052	4.53289	119.883	6.14125	0.475992	18.2931		2.76687	279.021		7.11904	39.3233	0.208484	5.2887	1.18812	4.7321	48.3215	2.58575	0.0543341	221.347	264.565	1190.86	23.0654	3.77153	9.41665	56.8627	3.55941	94.9183	8.8037	5.63981	10.0723	8.21714		2.41205	14.4007	4.52221	38.5825	0.0918615
Set119	48.2912	6.43539	31.3097	36.6465		28.5161	21.9763	29.282	0.784323	3.43016	9.06921	16.6425	1.17614	182.853	3.40529	0.398109	19.3977		4.17057	279.021		7.11904		1.0944	8.68369	1.18812	2.4026	16.0376	1.26566	0.045656	211.245	212.423	1789.52	23.3304	4.41164	5.9043	73.1548	2.72223	188.202	2.95501	5.79144	8.43289	8.21714		1.93322	21.8759	3.32539	31.0842	0.0807134
Set120	39.9284	26.9198	21.7895	18.2062		26.2092	21.9763	34.0896	0.863257	3.43016	7.39543	23.7059	1.17614	69.3526	6.14125	0.50709	14.1954		2.76687	279.021	79.0718	6.32316		0.230555	8.96992	0.92433	4.17741	16.0376	2.41969	0.045656	221.347	220.36		17.757	4.33921	7.14109	30.6617	2.6803	53.7439	12.1411	5.63981	8.43289	6.53812		0.408836	68.3469	2.88527	46.0807	0.0876861
Set121	47.3299	28.6497	24.2137	18.2062		31.9168	22.6611	34.0896	0.942191	4.70088	8.07451	7.63173	1.19983	69.3526	6.72864	0.616071	5.03823		2.76687			7.11904		0.208484	5.83287	0.748717	4.0084	16.0376	1.26566	0.0757791	211.245	70.91		25.1286	3.64917	5.9043	25.652	3.55941	115.109	7.66008	5.63981	7.47142	27.6427		3.75842	66.3359	3.32539	38.5825	0.0858704
Set122	251.958	6.43539	58.7114	14.7018		22.9963	28.4046	22.9363	0.863257	4.70088	7.49444	7.63173	1.17614	173.678	6.14125	1.01092	12.3961	10.7767	4.33957			7.11904	37.8822	0.208484	5.83287	1.79114	4.17741	34.0688	2.32155	0.0251246		70.0343	1190.86	28.2983	3.70794	2.01107	29.2963	4.23061	115.109	22.1937	6.54667	11.3894	8.21714		0.657648	14.4007	4.53049	88.2577	0.0858704
Set123	37.8389	20.3646	48.5531	14.7018		26.2264	22.8749	34.0896	0.977652	3.43016	8.07451	16.2568	5.58206	173.678	8.60957	0.756352	12.3961	10.7767	8.85429		46.7608	9.23925	36.1001	0.208484	8.68369	0.92433	4.0084	18.3379	2.54951	0.0351795		71.9155		22.7586	3.64917	7.29413	30.6617	5.15502	268.201	7.87746	5.80275	11.9094	26.1098		0.657648	63.2772	5.00636	93.9337	0.0870729
Set124		6.43539	22.4613	30.2121		23.5144	21.9763	34.0896	0.942191	5.22704	8.69694	16.2568		69.3526	6.14125	0.477056	14.2625		2.76687	342.514	79.0718	7.11904		0.208484	8.62603	1.29581	4.0084	15.0673	2.42025	0.0251246		69.1586		26.395	3.64917	5.9043	26.7772	3.55941	231.932	7.79658	6.2988	9.47695	27.6427		0.408836	14.4007	2.88527	58.4128	0.0733301
Set125	67.3085	6.43539	28.1715	18.2062		26.5098	20.7764	28.024	1.02615	3.43016	7.59344	16.2568	1.73818	253.726	8.36604	1.04421	5.03823		2.76687			9.46655	36.1001	0.208484	8.96992	0.605806	2.4026	41.0638	1.28637	0.0385853		71.9155		26.395	3.28053	6.9524	29.2963	2.72223	53.7439	7.75641	5.78013	6.976	8.21714		0.408836	17.732	2.88527	88.2577	0.0844382
Set126	38.5003	6.43539	21.7895	18.2062		23.9359	20.7764	33.1195	0.850156	3.43016	7.49444	16.729	5.56411	69.3526	7.92492	0.398109	10.1951		2.76687	279.021		7.11904		0.213599	6.42234	0.92433	2.4026	15.0673	2.24424	0.0351795		71.9155		22.7586	3.64917	9.66449	47.7278	2.72223	53.7439	7.79658	5.80275	6.976	27.6427		1.91179	43.1557	2.88527	48.4976	0.0844382
Set127	61.1881	25.8976	30.8685	14.7018		31.2151	21.9763	32.3979	1.158	4.78571	8.07451	7.63173	1.50086	182.853	6.49766	0.477056	14.1954		12.4877		84.6622	7.11904	36.1001	0.208484	6.42234	1.15737	4.17741	16.0376	1.93274	0.0701855		338.161	1190.86	25.1286	3.81162	2.01107	48.1872	3.81476	53.7439	7.65687	5.78629	6.976	6.53812		1.93322	14.4007	5.63794	76.0162	0.0733301
Set128	181.342	36.4746	35.5613	18.2062		26.7417	20.7764	28.024	1.07547	3.22714	8.46268	22.5511	1.17614	182.853	6.14125	0.398109	5.03823		12.7515		79.0718	9.46655	36.1001	0.260688	8.62603	0.92433	2.4026	16.8122	2.32183	0.0351795		69.1586		28.2983	3.99359	2.01107	75.3275	4.96656	53.7439	12.1411	5.78013	6.976	39.8722		0.408836	66.3359	3.32539	38.5825	0.0844382
Set129	251.958	37.9099	21.7895	14.7018		23.5144	21.9763	34.0896	0.977652	3.43016	6.77767	12.3101	1.19983	178.796	6.95962	0.616071	10.1951		10.7588			7.78599		0.208484	3.21069	1.33438	4.48387	16.0376	1.28637	0.0638849		70.91		21.0022	3.99359	9.41665	30.6617	2.6803	188.202	7.4674	6.16914	7.0537	8.21714		0.408836	14.4007	2.88527	108.322	0.0844382
Set130		28.7192	31.3097	14.7018		29.6819	22.6611	29.282	0.977652	4.78571	7.39543	12.3101	1.19983	69.3526	6.14125	0.398109	14.1954		2.76687	279.021	46.7608	7.11904	36.1001	0.25409	8.68369	1.58113	4.0084	16.8122	1.26566	0.0543341		212.423	408.271	22.7586	3.81162	6.9524	30.6617	3.39892	115.109	7.87746	5.51173	10.8707	22.0189		0.657648	62.6281	4.52221	73.1132	0.0870729
Set131	29.3093	25.0538	24.2137	27.7218		26.3399	21.9763	29.282	0.863257	3.72627	8.07451	16.0853		182.853	7.71052	0.537117	18.6347		4.17057	279.021	46.7608	7.11904	36.1001	0.343061	3.21069	0.748717	4.33288	16.0376	2.42025	0.0351795		71.9155		17.8968	3.77153	2.01107	29.2963	2.68945	53.7439	7.79658	4.72465	10.4431	31.576		0.408836	14.4007	3.32539	75.305	0.0902923
Set132	275.957	20.3646	47.6799	18.2062		25.2309	21.9763	31.2195	1.07547	3.43016	7.49444	7.63173	1.23708	173.678	7.68584	0.910391	8.99574		12.7694		79.0718	7.11904	36.1001	0.25409	8.68369	0.748717	4.17741	24.0335	2.41969	0.0251246		69.1586	1190.86	17.8968	4.27732	2.01107	29.2963	2.6803	231.932	7.72673	5.51173	7.47142	6.53812		1.93322	14.4007	4.92448	108.322	0.0876861
Set133	37.8389	51.9164	53.6595	37.5903		23.5144	22.8327	32.2555	0.980235	3.72627	8.46268	16.2568	1.23708	126.633	8.60957	0.398109	14.2625	10.7767	11.6778	300.113	46.7608	9.46655	36.1001	0.213599	11.5384	1.15737	4.0084	32.291	2.311	0.045656		70.0343		23.0654	3.28053	2.01107	29.2963	2.6803	53.7439	7.79658	5.78013	6.976	28.3715		0.408836	70.6365	2.88527	26.2761	0.0733301
Set134		6.43539	21.7895	14.7018		26.2264	21.9763	34.0896	0.927279	3.43016	7.49444	22.5511	1.23708	183.383	7.33111	0.398109	5.03823		10.2107			9.46655		0.427333	8.68369	1.15737	4.0084	18.3379	1.26566	0.0543341	147.759	269.925		17.757	3.75932	2.01107	30.6617	2.6803	115.109	7.65687	4.72465	6.976	31.576		0.657648	53.5555	2.88527	44.7485	0.0844382
Set135	38.5003	6.43539	21.7895	14.7018		27.7372	21.9763	46.0037	0.977652	2.76867	7.91977	12.3101	1.17614	69.3526	7.71052	0.74285	10.1951		2.76687	279.021		7.11904		0.25409	3.21069	0.748717	4.17741	16.8122	2.42025	0.0302683	147.759	69.1586		21.0022	3.64917	2.01107	30.6617	2.6803	53.7439	11.0926	5.78013	6.976	36.8886		0.657648	14.4007	2.88527	83.0284	0.0791169
Set136	67.3085	33.4449	21.7895	18.2062		30.7339	18.7967	39.1416	0.977652	5.05745	9.28229	16.9885	1.50086	183.913	6.49766	0.398109	14.2625		12.5187			10.7319		0.208484	5.9569	1.15737	5.3891	51.7588	1.83219	0.0351795	221.347	275.292		26.395	3.70794	2.01107	73.7337	3.91301	115.109	11.7677	5.80275	10.8707	8.21714		2.35915	43.1557	5.46381	31.0842	0.0733301
Set137	38.3828	28.6497	42.1696	14.7018		24.3853	21.9763	33.1195	1.00426	3.77719	7.39543	16.9885	4.42534	69.3526	3.99419	0.50709	17.8797		2.76687	300.113	84.6622	7.11904	39.3233	0.208484	3.21069	0.92433	5.4126	16.0376	2.42025	0.0351795		69.1586		25.1286	3.70794	7.32979	56.8627	2.6803	53.7439	9.44459	5.63981	6.976	31.576		1.57553	21.8759	2.88527	88.2577	0.0733301
Set138	45.2487	28.6497	46.8896	14.7018		26.2264	21.9763	36.4628	0.784323	3.72627	7.49444	25.2613	1.23708	119.883	7.21268	0.398109	10.1951		2.76687	300.113	79.0718	7.11904		0.213599	6.42234	1.18812	4.17741	16.0376	2.46969	0.0385853	221.347	71.9155		17.757	4.4242	2.01107	30.6617	5.42564	268.201	10.7549	5.80275	10.254	8.21714		0.657648	19.9756	4.52221	86.3744	0.0878502
Set139	41.5916	20.3646	31.5962	14.7018		24.3853	22.8327	34.0896	0.980235	6.30434	8.98767	29.2052	1.23708	267.18	19.2094	0.755455	5.03823		8.85429		46.7608	9.46655		0.208484	11.5384	1.15737	4.0084	18.3379	2.0633	0.0351795		220.36		23.0654	3.64917	7.32979	25.652	2.6803		7.95833	6.10755	9.02068	8.21714		2.35915	19.9756	5.46381	46.0807	0.0895017
Set140	35.174	28.6497	48.5531	18.2062		23.9359	20.7764	16.2027	0.863257	3.72627	7.59344	16.729	1.17614	173.678	7.21268	0.798041	10.1951		8.85429			7.11904	36.1001	0.294582	5.83287	1.18812	2.4026	16.8122	1.83219	0.0351795		71.9155		17.8968	3.70794	7.29413	75.4238	2.6803		7.44635	5.80275	6.976	6.53812		0.657648	19.9756	4.52221	88.2577	0.0878502
Set141	36.8207	6.43539	30.8685	18.2062		26.2264	20.7764	16.2027	0.980235	3.72627	7.39543	16.2568	1.49295	245.804	6.14125	0.477056	19.7771		10.7588		79.0718	9.46655		0.343061	8.98037	0.92433	5.75339	32.291	1.83219	0.0302683		69.1586	408.271	29.2034	4.41164	2.01107	66.6309	2.6803	231.932	10.0265	5.78013	6.976	6.53812		0.657648	19.9756	2.88527	88.2577	0.0844382
Set142	38.5003	6.43539	57.0274	14.7018		28.7905	18.7967	37.0138	0.863257	3.72627	9.14423	12.3101	1.19983	183.913	8.36604	0.616071	10.1951	10.7767	13.2417			10.7171	39.3233	0.294582	5.9569	0.748717	4.48387	43.9437	1.28637	0.0351795	211.245	70.91	1190.86	28.0829	3.05974	6.9524	29.2963	2.6803	53.7439	8.57751	5.63981	10.254	26.1098		0.817671	14.4007	5.69468	116.483	0.0733301
Set143		25.0538	21.7895	30.1919		26.3399	27.0558	34.0896	0.980235	5.22704	7.59344	16.6425	1.50086		6.14125	0.398109	19.0347		11.6778		266.343	10.7319	36.1001	0.208484	8.91495	1.15737	4.48387	47.7364	2.54361	0.045656		220.36	408.271	22.7586	4.33921	2.01107	66.6309	4.29948	231.932	12.3892	5.51173	10.0723	28.3715		0.657648	14.4007	9.21028	48.4976	0.0733301
Set144	43.98	37.9099	30.8685	18.2062		26.2264	21.9763	32.3979	1.18961	3.43016	6.97391	12.3101	1.17614	178.796	7.71052	0.477056	16.3865		10.2107		46.7608	7.11904	36.1001	0.208484	5.9569	0.748717	4.0084	15.0673	2.1158	0.0417842		69.1586		17.757	3.84608	2.01107	29.2963	2.72223		7.79658	5.78013	10.3087	8.21714		1.93322	43.1557	4.92448	44.7485	0.0844382
Set145	35.174	20.3646	31.5962	14.7018		26.2264	20.7764	33.2478	0.977652	1.4214	5.21587	15.897	1.17614	69.3526	9.64394	0.756352	5.03823	10.7767	4.17057		79.0718	10.688	39.3233	0.208484	7.99711	1.15737	4.0084	16.8122	2.32823	0.0402038		69.1586		21.0022	3.05974	2.01107	73.1548	5.55785	115.109	7.87746	5.51173	8.43289	26.1098		2.76811	53.5555	4.52221	26.2761	0.0858704
Set146	275.957	20.3646	48.1469	18.2062		26.2264	20.7764	34.0896	0.980235	3.43016	7.02736	15.897	1.49295	178.796	3.40529	0.50709	10.1951		2.76687	279.021		10.8238	39.3233	0.470466	3.21069	0.953044	5.61221	16.0376	1.26566	0.0433572		212.423		27.615	4.27732	7.32979	30.6617	2.6803	53.7439	7.87746	5.79144	8.43289	8.21714		1.32948	14.4007	5.46381	26.2761	0.0791169
Set147	67.3085	26.9198	21.7895	14.7018		21.4978	18.7967	39.8408	1.10047	3.43016	7.49444	16.2568	1.17614	69.3526	7.78936	0.756352	14.2625		2.76687	279.021		7.11904		0.230555	5.83287	0.748717	4.66134	16.8122	1.26566	0.045656	147.759	212.423		26.395	3.77153	7.32979	29.2963	2.68945	189.435	8.91785	5.78013	7.0537	31.576		0.408836	19.9756	2.88527	38.5825	0.0864537
Set148	41.5916	20.3646	21.7895	19.9357		24.507	26.246	33.841	1.09207	3.43016	7.46054	16.2568	1.50086	183.913	7.22734	0.910391	14.1954		8.85429			7.11904		0.213599	5.9569	1.15737	2.4026	43.9437	1.26566	0.0523979	147.759	212.423	408.271	40.9286	3.64917	2.01107	29.2963	4.23061	83.712	10.0265	5.78013	7.47142	6.53812		2.06332	63.2772	4.92448	48.4976	0.0870729
Set149	46.3685	6.43539	24.2137	18.2062		26.2264	20.7764	29.282	0.977652	3.43016	8.07451	18.336	2.1769	182.853	7.33111	0.756352	18.2931		4.33957	359.238	46.7608	9.55932	36.1001	0.213599	3.21069	1.15737	4.0084	15.0673	2.36562	0.0435683		207.697		22.7586	4.8614	7.32979	48.1872	5.08805	53.7439	2.95501	5.78629	8.58981	39.8722		1.71384	14.4007	4.40396	93.9337	0.0844279
Set150	48.2912	28.6497	21.7895	18.2062		23.2586	20.7764	29.282	0.977652	3.72627	7.59344	7.63173	1.19983	119.353	7.21268	0.398109	10.1951		4.33957		79.0718	7.78599	36.1001	0.343061	3.21069	1.05622	4.48387	15.0673	1.26566	0.0351795		70.91		17.702	3.84608	2.01107	68.8573	2.6803	115.109	7.79658	5.78013	8.43289	6.53812		0.408836	14.4007	4.52221	26.2761	0.0844382
Set151	162.124	20.3646	21.7895	14.7018		26.3399	25.1042	34.0896	0.977652	5.22704	7.59344	7.63173	1.17614	173.678	8.36604	0.398109	12.3961		11.6778			9.46655	37.8822	0.208484	6.42234	0.953044	8.53416	23.8984	2.55043	0.0417842		69.1586		17.757	3.84608	5.9043	31.0441	4.23061	177.672	8.57751	5.78013	10.254	28.3715		0.408836	19.9756	3.32539	38.5825	0.0733301
Set152	67.3085	6.43539	22.4613	27.7218		31.2151	20.7764	28.024	0.784323	6.30434	8.80194	7.63173	1.17614	183.383	6.72864	0.537117	5.03823		7.76814			11.1001		0.374761	3.21069	1.15737	2.4026	16.0376	1.28637	0.0302683		70.91		26.395	4.06172	6.9524	29.2963	5.73862		7.79658	5.79144	6.976	27.6427		0.408836	53.5555	4.52221	88.2577	0.0733301
Set153	48.2912	28.7192	30.8685	14.7018		21.9528	22.6611	46.0037	0.850156	3.72627	5.21587	7.63173	1.49295	69.3526	6.49766	0.910391	18.2931		2.76687	279.021		9.47711	36.1001	0.505343	8.91495	1.40399	4.48387	15.0673	2.60502	0.0351795	221.347	69.1586		17.757	3.70794	5.9043	30.6617	2.70553	115.109	7.79658	5.80275	10.254			0.408836	21.8759	4.52221	26.2761	0.0733301
Set154	35.174	28.6497	21.7895	31.2074		23.9359	22.6611	28.024	0.980235	5.13144	8.38573	16.729	5.22166	55.853	4.7114	0.616071	12.3961	10.7767	2.61943			11.1001	36.1001	0.208484	5.2887	1.15737	4.0084	53.0703	1.26566	0.0402038		69.1586	1190.86	26.395	3.28053	6.9524	30.6617	4.2666	282.847	9.44459	6.54667	10.8707	31.7851		1.93322	73.7341	7.95842	83.0284	0.0733301
Set155	35.174	37.9099	48.5531	18.2062		22.9963	24.7586	32.6782	1.00426	3.72627	7.49444	16.2568	1.17614	69.3526	6.14125	0.398109	14.1954		7.22234	342.514	46.7608	7.11904	39.3233	0.213599	8.68369	1.66728	4.0084	15.0673	1.93274	0.0433572		69.1586		26.395	3.70794	5.9043	63.2736	3.55941	181.018	7.95833	5.78013	8.43289	22.0189		0.657648	14.4007	3.32539	88.2577	0.0895017
Set156	275.957	20.3646	31.5962	14.7018		22.9963	20.7764	63.2174	0.977652	3.43016	8.46268	7.63173	1.23708	259.558	8.60957	0.756352	10.1951		2.76687			12.0569		0.208484	7.27599	0.92433	15.0021	23.8984	1.83219	0.0351795		69.1586		17.702	4.41164	2.01107	75.3275	2.6803	53.7439	10.0265	5.51173	6.976	26.1098		1.93322	14.4007	4.52221	58.0988	0.0733301
Set157	45.2487	28.7192	48.5531	14.7018		26.2264	20.7764	33.841	1.02615	3.43016	8.46268	16.9885	1.23708	69.3526	6.72864	0.46671	14.1954	10.7767	11.6778	300.113	46.7608	10.7319	36.1001	0.213599	8.81237	0.748717	2.4026	16.8122	2.54951	0.0565236	147.759	269.925		26.395	3.70794	8.16582	31.0441	2.6803	53.7439	7.87746	5.78629	8.43289	31.576		0.657648	63.2772	3.32539	93.9337	0.0733301
Set158		26.9198	21.7895	14.7018		21.4978	18.7967	16.2027	1.03907	5.38904	8.07451	7.63173	1.49295	69.3526	6.14125	0.50709	18.2931		11.6778			7.11904		0.294582	5.83287	1.15737	4.17741	99.9585	2.311	0.0453523		69.1586		17.757	3.77153	2.01107	88.2247	2.6803	282.847	7.72673	5.78629	10.8707	6.53812		1.57553	14.4007	4.52221	75.305	0.0733301
Set159	48.2912	33.2798	21.7895	30.2121		29.248	21.9763	29.282	0.942191	3.43016	7.42665	16.2568	1.50086	183.383	6.14125	0.616071	5.03823	10.7767	11.6778		79.0718	7.11904		0.25409	6.42234	0.748717	4.17741	16.8122	2.12622	0.0351795		212.423	408.271	23.3304	3.70794	2.01107	26.7772	3.55941	176.809	7.79658	5.78013	5.10641	28.3715		0.817671	66.3359	5.69468	26.2761	0.0858704
Set160	67.3085	38.6049	25.938	36.5826		24.5217	26.246	34.0896	1.64893	4.78571	8.38573	16.9885	1.23708	69.3526	8.28076	0.756352	18.2931		12.1307	279.021		7.11904	36.1001	0.294582	5.83287	0.748717	4.17741	23.8984	1.26566	0.0638849		250.664	1190.86	28.2983	3.28053	2.01107	25.652	5.56536	186.621	12.0446	7.48934	7.47142	27.6427		0.408836	66.3359	3.32539	26.2761	0.0733301
Set161	38.5003	20.3646	31.5962	35.4415		22.9963	25.1042	32.6782	0.980235	3.43016	8.94294	23.7059	5.56411	182.853	6.72864	0.398109	18.6882		4.17057	279.021	79.0718	12.4461		0.208484	5.83287	1.18812	4.66134	111.722	1.26566	0.0351795	147.759	164.731		26.395	4.27732	9.18751	30.6617	3.75541	75.2944	11.0926	5.63981	10.0723	36.0389		0.657648	14.4007	2.88527	26.2761	0.0844382
Set162	35.174	38.6049	42.1113	29.6301		22.9963	20.7764	29.282	0.784323	6.61367	5.35881	16.9885	6.06591	259.558	6.95962	0.923336	14.1954		37.8867			9.00815	36.1001	0.427333	5.83287	1.15737	4.48387	35.7672	2.36562	0.0565693		69.1586		31.1111	4.33921	2.01107	30.6617	2.70553	53.7439	7.72673	5.63981	7.44762	31.576		2.02031	62.6281	4.92448	26.2761	0.0844382
Set163	35.174	20.3646	46.8896	18.2062		22.9963	28.1464	38.4968	0.980235	3.43016	8.2461	15.897	1.17614	259.558	3.40529	0.398109	14.2625		4.17057		46.7608	9.46655		0.294582	3.21069	0.748717	4.17741	15.0673	2.47311	0.0417842		69.1586		23.3304	3.28053	2.01107	29.2963	2.6803	115.109	7.65687	5.78013	10.3087	26.1098		0.408836	73.7341	3.32539	44.7485	0.0733301
Set164	39.9284	20.3646	59.4655	14.7018		26.3399	21.9763	46.0037	1.158	3.72627	8.07451	12.3101	1.19983	126.633	7.71052	0.537117	16.3865		2.69315	279.021	266.343	7.78599	37.8822	0.213599	3.21069	0.92433	2.4026	49.0132	2.55043	0.0417842	211.245	78.1269		29.2034	3.70794	7.32979	30.6617	2.6803	53.7439	7.95833	5.51173	5.10641	6.53812		0.657648	63.2772	3.32539	38.5825	0.0733301
Set165	251.958	28.6497	21.7895	29.6301		26.2264	18.7967	32.3979	0.850156	5.22704	8.07451	7.63173	4.80438	183.913	6.02126	0.477056	5.03823		2.76687		266.343	10.3341	37.8822	0.343061	8.68369	1.18812	4.66134	16.0376	2.42025	0.0302683		212.423		30.5607	3.70794	2.01107	29.2963	2.6803	53.7439	7.44635	5.79144	8.43289	6.53812		0.408836	17.732	3.32539	58.4128	0.0870369
Set166	46.2715	20.3646	46.8896	28.6118		23.9359	21.9763	28.024	0.980235	4.55765	7.26395	15.897	1.17614	119.883	7.71052	0.46671	10.1951		2.76687	279.021	394.928	9.23735		0.208484	8.98037	0.92433	4.0084	18.3379	2.41969	0.0543341		70.0343		27.5875	3.81162	6.9524	73.1548	2.70553	115.109	8.8037	5.78013	8.58981	36.0389		0.817671	21.8759	4.52221	46.0807	0.0733301
Set167	67.3085	6.43539	24.2137	36.7325		26.2264	23.7044	29.282	0.549093	3.72627	7.42665	15.897	1.49295	69.3526	7.21268	0.616071	16.7948		4.17057	325.79	266.343	7.11904	36.1001	0.25409	8.91495	1.18812	4.0084	31.7513	1.28637	0.045656		70.91		24.5768	3.05974	7.14109	58.5222	2.6803	53.7439	7.95833	6.36088	13.311	31.7851		2.02031	19.9756	4.52221	58.4128	0.0844382
Set168		28.6497	25.3164	31.2074		10.5441	21.9763	34.0896	0.850156	3.43016	7.49444	7.63173	5.56411	173.678	6.14125	0.616071	12.3961		4.33957		46.7608	10.8238	36.1001	0.213599	3.21069	0.748717	4.66134	23.8984	1.26566	0.0351795		69.1586	1789.52	17.757	3.70794	7.14109	25.652	5.15502	188.202	8.57751	5.79144	6.976	6.53812		0.408836	65.7635	2.88527	31.0842	0.0870369
Set169	251.958	20.3646	41.8543	14.7018		26.2264	20.7764	29.282	1.158	3.72627	8.46268	16.9885	1.17614	69.3526	6.14125	0.756352	14.1954		11.6778	300.113	266.343	10.8238		0.470466	3.21069	0.748717	4.17064	45.0385	1.83219	0.0302683				17.757	3.70794	6.9524	26.7772	4.66298		9.37473	5.78013	10.8707	27.6427		0.657648	40.4402	4.52221	31.0842	0.0844382
Set170	35.174	31.6652	48.5531	18.2062		26.3399	22.8327	34.0896	0.977652	3.43016	7.42665	16.729	1.50086	182.853	10.9182	0.475992	10.1951		2.76687		266.343	9.23735	36.1001	0.213599	6.42234	0.92433	4.17741	31.4019	1.26566	0.0351795		212.423		17.8968	3.99359	2.01107	63.2736	5.56536	53.7439	8.57751	5.79144	7.47142	40.5495		1.05943	14.4007	2.88527	46.0807	0.0733301
Set171	45.2487	36.7565	24.2137	19.9357		21.4978	21.9763	33.1195	0.980235	3.72627	7.39543	17.9295	1.49295	119.883	6.14125	0.398109	18.7971		12.1307	279.021	46.7608	7.11904	36.1001	0.294582	8.96992	1.18812	2.4026	16.0376	1.26566	0.0482119		212.423	1789.52	30.8209	3.64917	2.01107	31.0441	4.23061	231.932	7.65687	5.78013	5.10641	26.1098		2.02031	21.8759	4.40396	26.2761	0.0844382
Set172		20.3646	41.8543	34.968		22.9963	25.4361	34.0896	0.927279	2.76867	7.49444	12.3101	1.19983	126.633	6.14125	0.537117	14.1954		2.76687	279.021	46.7608	9.46655		0.208484	6.42234	0.748717	2.4026	41.0638	2.41969	0.0402038	221.347	70.91		17.8968	3.70794	10.1136	48.1872	2.6803	53.7439	7.65687	5.78013	11.3894	27.6427		1.57553	40.4402	4.52221	31.0842	0.0733301
Set173	67.3085	28.7192	31.5962	14.7018		24.5801	23.7044	50.0701	0.980235	3.43016	7.59344	7.63173	1.17614	317.217	8.60957	0.616071	5.03823		4.33957		266.343	7.78599	37.8822	0.343061	5.2887	0.748717	5.61221	16.0376	1.26566	0.0543341	147.759	164.731	408.271	23.3304	3.99359	5.9043	29.2963	4.2666	177.672	7.65687	5.78013	6.976	6.53812		0.408836	44.1059	4.53049	48.4976	0.0844382
Set174	46.3685	20.3646	47.6799	35.4188		28.9467	21.9763	48.3083	0.927279	3.72627	7.49444	12.3101	1.19983	178.796	8.28076	0.477056	14.2625		13.0152			7.11904		0.208484	5.83287	1.15737	4.48387	53.0703	2.28896	0.0351795		71.9155	1190.86	36.1484	3.28053	8.16582	30.6617	2.72223	177.672	7.95833	5.78013	10.0723	40.0714		0.408836	14.4007	5.9206	38.5825	0.0844382
Set175	48.2912	20.3646	21.7895	24.1697		30.7339	25.1042	32.3979	0.982369	6.27979	10.4651	7.63173	1.19983	182.853	7.71052	0.398109	12.3961		2.76687		46.7608	10.7319	36.1001	0.208484	5.2887	0.748717	4.0084	16.0376	1.26566	0.0351795		70.0343	1789.52	23.0654	3.64917	6.9524	31.0441	2.70553		7.4674	5.80275	10.0723	6.53812		0.408836	14.4007	4.52221	48.4976	0.0844382
Set176		25.0538	21.7895	14.7018		12.6016	23.9896	33.1195	0.863257	3.43016	8.1603	15.897	1.23708	69.3526	7.71052	0.395367	23.7038		11.6778	279.021	79.0718	7.11904		0.208484	5.83287	0.748717	4.0084	34.0688	2.54951	0.0351795				26.395	3.70794	7.29413	29.2963	2.6803	231.932	11.0926	5.78013	10.0723	6.53812		0.408836	14.4007	5.00636	38.5825	0.0844382
Set177	275.957	20.3646	31.5962	31.2074		26.3399	20.7764	33.1195	0.863257	5.13144	8.07451	16.2568	1.17614	182.853	8.28076	0.537117	19.3745		13.5013		266.343	7.11904	37.8822	0.208484	5.83287	1.15737	4.0084	68.5938	1.26566	0.0251246		70.91		27.5875	3.64917	7.32979	29.2963	2.72223	53.7439	7.79658	5.80275	9.61248	27.6427		0.657648	40.4402	9.21028	26.2761	0.0870729
Set178	29.3093	20.3646	21.7895	18.2062		22.0102	20.7764	33.1195	0.850156	3.72627	7.49444	12.3101	1.19983	119.353	8.28076	0.46671	14.1954	10.7767	7.22234	300.113	46.7608	7.11904	37.8822	0.208484	5.83287	0.748717	2.4026	27.3477	1.26566	0.0351795	221.347	250.664	408.271	17.8968	4.68606	2.01107	29.2963	4.23061	115.109	7.66008	5.79144	10.254	6.53812		0.657648	21.8759	6.80712	26.2761	0.0733301
Set179	41.5916	6.43539	41.8543	14.7018		24.9872	21.9763	32.3979	0.980235	5.22704	8.07451	16.0853	1.17614	69.3526	6.72864	0.50709	14.1954		2.61943	279.021		9.55932	36.1001	0.213599	8.91495	0.748717	4.0084	16.0376	2.311	0.0351795		70.91	1789.52	21.0022	4.45956	2.01107	26.7772	3.55941	222.838	8.57751	5.80275	7.44762	8.21714		0.408836	14.4007	2.88527	88.2577	0.0814159
Set180	35.174	6.43539	47.6799	18.2062		26.3399	18.7967	33.1195	0.863257	3.43016	7.49444	16.2568	1.17614	183.913	3.99419	0.50709	14.2625		12.7694		46.7608	7.90013	36.1001	0.213599	8.62603	1.15737	4.33288	16.0376	2.28896	0.0351795		220.36	408.271	25.1286	3.64917	2.01107	29.2963	2.72223	177.672	7.72673	5.63981	11.9094	27.6427		1.71384	19.9756	5.69468	38.5825	0.0844382
Set181	251.958	26.4087	21.7895	14.7018		26.2264	21.9763	29.282	1.02615	3.43016	8.26983	29.2052	6.41538	119.883	6.14125	0.398109	16.6789		4.17057	325.79		10.7171	37.8822	0.213599	5.2887	0.92433	4.0084	23.8984	2.311	0.0507678		70.91		21.0022	3.77153	5.9043	30.6617	2.72223	100.547	7.79658	5.78013	10.8707	26.1098		2.41205	19.9756	9.56959	46.0807	0.0844382
Set182	35.174	25.0538	41.8543	31.2074		23.9359	26.246	32.9922	0.980235	3.02412	8.30485	7.63173	1.29945	446.999	10.4495	0.46671	15.6379		13.6864		79.0718	7.78599		0.25409	6.42234	1.15737	4.0084	23.8984	1.83219	0.0543341		69.1586	1789.52	45.0489	3.64917	5.9043	63.2736	2.72223	181.018	7.65687	6.3335	8.58981	8.21714		1.05943	19.9756	4.52221	58.4128	0.0870729
Set183	35.174	6.43539	31.3097	14.7018		31.1557	22.6611	38.4968	0.980235	4.78571	7.39543	7.63173	1.50086	69.3526	6.14125	0.477056	10.1951		10.2107	279.021	266.343	10.8561		0.208484	5.83287	0.748717	8.00254	15.0673	2.54951	0.0251246		164.731	1190.86	17.757	3.81162	5.9043	29.2963	5.08892	53.7439	7.79658	5.78013	8.43289	41.7806		0.817671	40.4402	4.40396	38.5825	0.0733301
Set184	124.325	6.43539	21.7895	14.7018		22.9963	23.7044	71.9744	0.863257	3.43016	7.46054	16.9885	4.80438	69.3526	7.21268	0.398109	20.411		2.76687			9.46655		0.230555	8.91495	0.748717	4.33288	16.8122	1.26566	0.0417842	147.759	275.292		21.0022	3.70794	7.14109	31.0441	4.23061	53.7439	7.4253	5.78013	10.7653	8.21714		0.817671	19.9756	3.32539	81.7814	0.0878502
Set185	38.5003	6.43539	48.1469	30.1919		23.5144	20.7764	29.282	0.784323	3.72627	7.49444	16.2568	1.17614	221.206	6.02126	0.537117	14.2625		13.0152		266.343	7.11904		0.208484	5.83287	1.15737	4.98034	43.9437	1.28637	0.0351795		212.423	1789.52	26.395	3.70794	2.01107	26.7772	2.6803	53.7439	7.95833	5.63981	6.976	22.0189		1.93322	19.9756	8.8952	88.2577	0.135198
Set186	45.5257	6.43539	21.7895	14.7018		23.9359	22.6611	28.024	0.850156	3.72627	7.42665	17.9295	1.23708	69.3526	7.71052	0.74285	10.1951		2.76687	342.514	46.7608	9.23925	36.1001	0.213599	3.21069	1.15737	6.82496	77.0088	2.54951	0.0565236		69.1586		17.757	3.07539	2.01107	75.3275	4.96656	231.932	8.91785	5.79144	6.976	36.0389		0.657648	14.4007	2.88527	26.2761	0.0844382
Set187		38.6049	39.9299	14.7018		23.9359	21.9763	29.282	0.784323	3.43016	7.02341	12.3101	1.19983	178.796	6.49766	0.398109	10.1951		12.7504			7.78599	36.1001	0.208484	5.9569	0.92433	4.17741	43.9437	1.28637	0.0351795	147.759	220.36		17.8968	3.77153	2.01107	29.2963	2.6803	53.7439	8.8037	5.78013	10.3087	8.21714		2.45342	14.4007	4.92448	116.483	0.0844382
Set188		6.43539	30.8685	14.7018		22.9963	21.9505	33.841	0.927279	3.43016	7.49444	12.3101	1.19983	69.3526	8.28076	0.910391	16.9057		2.76687	279.021		7.11904		0.208484	7.32029	1.18812	4.17741	23.8984	1.26566	0.0433572		70.91		23.3304	3.84608	7.32979	30.6617	2.72223	98.0799	7.95833	5.80275	7.47142	26.1098		0.817671	14.4007	4.52221	31.0842	0.0791169
Set189	29.3093	20.3646	42.1696	30.1332		11.973	21.9763	29.282	0.977652	3.77719	7.42665	7.63173	1.17614	173.678	3.99419	0.395367	10.1951		12.7504			10.9619	36.1001	0.208484	5.83287	1.15737	4.17741	10.7516	2.48488	0.0351795		71.9155	408.271	27.615	3.70794	2.01107	26.7772	3.55941	231.932	7.79658	6.3335	12.6891	27.6427		0.408836	21.8759	3.32539	48.4976	0.0733301
Set190	251.958	6.43539	31.3097	31.9698		24.5217	26.0828	49.7816	0.784323	3.43016	8.69694	16.2568	1.17614	183.913	10.9182	0.616071	19.7384		4.17057		46.7608	9.46655	36.1001	0.294582	5.83287	1.15737	2.4026	43.9437	2.41969	0.0453523		71.9155		31.9339	4.27732	5.9043	31.0441	3.55941	231.932	7.95833	6.3335	6.976	8.21714		0.657648	35.3216	9.21028	88.2577	0.0733301
Set191		28.6497	31.3097	14.7018		23.5144	20.7764	33.1195	0.977652	5.22704	8.2461	7.63173	1.19983	119.353	8.28076	0.398109	18.6882	10.7767	4.17057		46.7608	10.7319	36.1001	0.208484	5.9569	0.748717	4.0084	16.8122	1.26566	0.045656		220.36	408.271	23.0654	3.77153	2.01107	29.2963	2.72223	53.7439	7.65687	6.53499	6.976	26.1098		0.408836	14.4007	3.32539	31.0842	0.0844279
Set192	41.5916	33.4449	21.7895	30.1919		23.7752	25.1042	33.1195	0.977652	3.72627	4.32623	16.729	1.19983	267.18	6.72864	0.477056	14.1954		11.6778		46.7608	9.46655		0.208484	3.21069	1.40399	4.0084	68.5938	1.83219	0.0351795	147.759		408.271	27.6849	4.06172	2.01107	30.6617	2.72223	53.7439	11.0926	5.51173	6.976	31.7851		1.93322	73.7341	5.00636	26.2761	0.0733301
Set193	61.1881		30.8685	14.7018		22.9963	25.4361	29.282	0.977652	6.6926	7.51004	18.336	1.17614	182.853	6.14125	0.477056	14.1954		15.132		46.7608	7.78599	37.8822	0.230555	11.3413	0.92433	5.75339	15.0673	1.26566	0.0402038	147.759	69.1586		24.5768	3.99359	10.1136	88.2247	2.6803	231.932	7.77747	6.53499	10.7653	26.1098		2.28493	14.4007	4.52221	88.2577	0.0733301
Set194		25.0538	52.6713	18.2062		26.2264	26.0828	33.2478	0.977652	3.86287	7.49444	16.2568	1.17614	245.804	6.14125	0.50709	12.3961	10.7767	8.85429			9.46655	36.1001	0.208484	8.68369	0.953044	2.4026	32.291	2.38646	0.0351795		69.1586		17.8968	3.64917	2.01107	48.1872	3.39892	249.277	7.87746	5.63981	10.0723	6.53812		0.817671	62.6281	4.52221	81.7814	0.0791169
Set195	35.174	20.3646	48.5531	14.7018		24.3853	20.7764	34.0896	0.863257	3.86287	7.39543	7.63173	1.19983	182.853	6.14125	0.616071	18.6882		8.85429		46.7608	9.13608	36.1001	0.208484	5.9569	0.748717	6.82496	27.3477	2.28896	0.0251246	221.347	212.423		30.2846	4.5084	7.32979	29.2963	3.39892	100.547	7.79658	5.63981	7.47142	8.21714		0.408836	14.4007	2.88527	88.2577	0.0733301
Set196	35.174	28.6497	31.3097	34.5342		23.9359	21.9763	32.2555	0.863257	4.70088	7.39543	16.2568	4.80438	182.853	7.68584	0.398109	19.7384	10.7767	2.76687	279.021	79.0718	9.23925	36.1001	0.213599	8.68369	1.15737	4.0084	16.0376	2.42025	0.072128	147.759	69.1586	1190.86	30.5693	4.27732	6.9524	30.6617	2.6803	53.7439	10.7549	5.79144	6.976	6.53812		2.06332	62.6281	9.21028	88.2577	0.0733301
Set197	56.8385	6.43539	31.5962	30.1332		23.5144	21.9763	28.024	0.977652	3.72627	7.42665	12.3101	1.19983	69.3526	7.21268	0.616071	14.2625		7.22234	279.021		9.46655		0.294582	8.68369	0.748717	4.17741	34.0688	2.46969	0.0402038	147.759	69.1586	1789.52	31.0372	4.84488	7.32979	29.2963	5.55785	231.932	8.91785	5.80275	10.0723	22.0189		0.817671	14.4007	2.88527	83.0284	0.0733301
Set198	35.174	6.43539	21.7895	14.7018		23.9359	20.7764	32.3979	0.971162	3.43016	8.07451	18.336	1.17614	69.3526	6.70656	0.756352	10.1951		2.76687	342.514	266.343	10.7319	36.1001	0.213599	5.83287	0.748717	4.48387	46.2461	2.41628	0.0351795		69.1586		22.7586	3.70794	5.9043	26.7772	3.81476	53.7439	11.2189	5.78013	8.58981	39.8722		0.817671	14.4007	5.69468	93.9337	0.0733301
Set199		6.43539	21.7895	18.2062		30.123	22.6611	49.7816	0.784323	3.86287	7.59344	12.3101	1.19983	178.796	6.14125	0.756352	10.1951		10.2107		46.7608	9.46655		0.343061	5.9569	0.748717	4.17741	16.0376	2.63276	0.0402038	147.759	164.731		17.757	3.64917	7.32979	29.2963	2.6803	53.7439	7.79658	5.63981	10.0723	8.21714		1.53865	14.4007	2.88527	58.4128	0.0870729
Set200	38.3828	20.3646	30.8685	30.2121		11.973	22.8327	33.1195	1.03907	2.76867	7.59344	7.63173	1.19983	173.678	7.71052	0.398109	16.9057		4.17057			9.55932	36.1001	0.213599	3.21069	0.748717	2.4026	23.8984	2.54951	0.0412274		69.1586	408.271	17.8968	3.84608	10.3488	26.7772	2.70553		7.65687	6.53499	10.7653	8.21714		0.817671	21.8759	4.52221	88.2577	0.0870369
Set201	38.5003	28.7192	31.5962	30.2121		26.3399	20.7764	33.1195	0.977652	3.43016	7.42665	16.6425	1.49295	173.678	5.1065	0.398109	5.03823		2.76687	279.021	79.0718	9.46655	37.8822	0.208484	3.21069	0.953044	4.17741	16.8122	2.311	0.0402038		171.69		17.757	3.99359	6.9524	105.813	2.6803	53.7439	7.65687	5.51173	10.8707	37.6258		0.408836	14.4007	5.00636	58.0988	0.0844382
Set202	36.8207		48.1469	18.2062		22.9963	26.1852	34.0896	0.942191	4.89881	9.14423	15.897	1.23708	385.26	9.98064	0.686211	19.7384		8.85429		46.7608	7.11904	36.1001	0.260688	8.62603	1.15737	4.0084	15.0673	1.28637	0.0417842		212.423	1190.86	30.5607	4.27732	8.16582	31.0441	2.70553	61.2994	8.8037	5.63981	8.43289	8.21714		0.408836	62.6281	3.32539	75.305	0.0733301
Set203	47.3299	6.43539	48.5531	14.7018		23.2586	20.7764	25.4157	1.158	2.76867	6.97391	7.63173	1.19983	173.678	7.71052	0.910391	14.1954		2.76687			9.46655	39.3233	0.208484	3.21069	1.15737	10.0889	16.0376	1.28637	0.0351795	221.347	70.0343		22.7586	3.77153	5.9043	29.2963	4.23061	231.932	7.79658	5.51173	6.976	26.1098		1.05943	40.4402	4.52221	88.2577	0.0844382
Set204	35.174	6.43539	47.6499	14.7018		22.9963	22.8327	32.9922	0.982369	3.43016	7.59344	16.2568	5.58206	69.3526	6.49766	0.616071	5.03823		2.76687			9.46655	36.1001	0.208484	3.21069	0.748717	4.17741	18.3379	2.6303	0.045656		69.1586	1789.52	23.3304	3.84608	2.01107	29.2963	4.96656	189.435	7.95833	5.80275	7.47142	8.21714		0.817671	19.9756	2.88527	108.322	0.0733301
Set205	41.5916	38.6049	21.7895	14.7018		26.2092	25.1042	34.0896	0.980235	3.22714	8.19155	16.729	4.42534	69.3526	11.0779	0.475992	14.1954	10.7767	11.6778	279.021		6.32316	37.8822	0.294582	9.64282	1.15737	5.4126	32.291	2.5686	0.0402038				17.757	3.99359	7.29413	58.5222	3.81476	282.847	7.79658	5.79144	7.0537	31.576		0.657648	64.9114	2.88527	88.2577	0.0858704
Set206		6.43539	46.9089	30.2121		23.9359	20.7764	49.045	0.977652	3.72627	8.07451	16.9885	1.17614	69.3526	6.72864	0.616071	5.03823		4.33957	279.021		7.11904		0.260688	8.98037	1.79114	4.0084	18.3379	2.613	0.0402038		71.9155		17.702	3.05974	5.9043	75.3275	2.72223	278.324	7.95833	5.51173	7.47142	31.576		0.817671	14.4007	4.52221	159.72	0.0844382
Set207	35.174	33.4449	46.8896	14.7018		26.3399	26.12	32.6782	0.977652	3.86287	8.07451	15.897	1.23708	221.206	8.36604	0.756352	5.03823		11.6778			9.55932		0.208484	8.62603	1.15737	4.17741	16.7657	1.28637	0.0251246	221.347	69.1586	1758.63	28.0829	3.81162	6.9524	25.652	2.68945	98.0799	7.95833	5.78013	10.8707	40.8264		0.657648	21.8759	4.52221	116.483	0.109511
Set208	29.3093	26.4087	21.7895	14.7018		23.5144	20.7764	32.3979	0.850156	3.43016	7.59344	7.63173	1.19983	173.678	8.60957	0.398109	5.03823		2.76687		79.0718	7.11904		0.294582	5.83287	1.15737	4.17741	32.291	1.83219	0.0251246		70.91		17.757	3.81162	7.29413	30.6617	5.08892	53.7439	7.95833	4.72465	5.10641	8.21714		0.817671	66.3359	2.88527	88.2577	0.0844382
Set209	57.7998	28.7192	21.7895	28.9708		26.2264	21.9763	46.0037	0.980235	4.70088	5.21587	15.897	1.17614	178.796	9.64394	0.548082	14.2625	10.7767	4.33957			7.78599	37.8822	0.343061	5.9569	0.748717	2.4026	53.0703	1.26566	0.0302683	221.347	69.1586	1789.52	30.5607	3.99359	7.29413	29.2963	4.96656	231.932	7.79658	6.3335	9.61248	31.576		0.408836	66.3359	5.69468	26.2761	0.0733301
Set210	57.7998	26.9198	31.5962	30.1332		26.2264	23.7044	33.841	0.977652	3.43016	8.07451	16.2568	1.17614	182.853	7.21268	0.756352	18.6882		4.17057			9.47711		0.208484	5.83287	1.15737	5.3891	54.0827	1.26566	0.0251246		70.91		24.5768	3.81162	5.9043	29.2963	2.72223	115.109	11.7677	6.54667	10.7653	6.53812		0.646661	19.9756	4.52221	26.2761	0.0882693
Set211		6.43539	30.8685	14.7018		24.5217	20.7764	39.8408	0.549093	3.43016	6.92441	16.2568	1.23708	69.3526	7.33111	0.398109	10.1951		7.76814			9.28374		0.208484	3.21069	0.92433	8.53416	16.0376	2.46969	0.0351795		69.1586		22.7586	3.64917	9.75247	30.6617	5.53851	53.7439	7.87746	5.78013	6.976	27.6427		0.817671	19.9756	8.64443	88.2577	0.0733301
Set212	35.174	28.6497	45.2074	31.2074		26.2264	25.1042	46.0037	0.863257	3.43016	4.38824	16.9885	7.51998	69.3526	6.14125	0.616071	5.03823		2.76687	342.514	266.343	7.11904		0.230555	11.3413	0.748717	4.17741	16.0376	2.48165	0.0351795		69.1586	1190.86	32.5324	3.64917	5.9043	30.6617	6.16416	53.7439	8.57751	6.54667	6.976	41.0581		0.657648	14.4007	3.32539	38.5825	0.0733301
Set213	46.3685	26.9198	31.5962	40.6891		29.3514	21.9763	34.0896	0.977652	4.7652	7.49444	16.9885	7.51998	183.913	6.14125	0.50709	5.03823		4.33957		79.0718	10.3341	36.1001	0.25409	10.5534	1.15737	4.0084	16.8122	1.27601	0.0402038		70.91	408.271	22.7586	3.70794	6.9524	29.2963	2.68945	186.621	7.66008	5.51173	6.976	26.1098		0.817671	48.8961	2.88527	46.0807	0.159112
Set214	251.958		21.7895	14.7018		26.3399	20.7764	38.4968	1.02615	4.03738	7.49444	18.336	1.17614	245.804	7.71052	0.616071	14.1954		12.7694			9.46655	37.8822	0.294582	5.83287	1.40399	4.98034	41.0638	1.26566	0.0453523		220.36		26.395	3.81162	7.14109	58.5222	2.70553	115.109	7.87746	5.78013	7.47142	27.6427		0.646661	14.4007	3.32539	58.0988	0.0844382
Set215	35.174	28.6497	61.7492	30.2121		23.7752	21.9763	44.9554	0.977652	4.78571	7.73497	16.9885	1.23708	183.383	6.14125	0.398109	18.6115	10.7767	2.76687		46.7608	12.3337	37.8822	0.208484	5.2887	1.15737	4.17741	15.0673	2.311	0.0351795		69.1586	408.271	24.5768	3.70794	9.66449	31.0441	3.39892	115.109	8.91785	5.78013	8.43289	36.0389		0.408836	14.4007	3.32539	26.2761	0.0844382
Set216	35.174	25.0538	31.5962	14.7018		22.9963	18.7967	28.024	1.03907	3.43016	7.42665	12.3101	1.19983	69.3526	7.21268	0.50709	14.1954	10.7767	7.22234	300.113		7.78599	36.1001	0.294582	5.83287	0.92433	4.0084	27.3477	2.36562	0.0351795		69.1586	1789.52	17.757	3.64917	6.9524	29.2963	4.23061	115.109	8.57751	5.80275	7.45952	27.6427		0.408836	19.9756	3.32539	88.2577	0.0733301
Set217	48.2912	75.1832	48.1469	34.9744		32.5106	21.9763	46.0037	0.784323	5.22704	8.60937	16.2568	1.49295	119.353	7.71052	0.477056	14.1954		2.76687	279.021		9.46655		0.294582	8.68369	1.15737	5.41668	16.8122	1.97931	0.0402038		69.1586	1190.86	26.395	3.28053	7.14109	26.7772	2.6803	226.99	7.44635	5.78629	6.976	31.576		0.408836	19.9756	4.52221	38.5825	0.0844382
Set218		6.43539	35.5613	29.9426		26.3399	18.7967	37.0138	0.850156	3.43016	4.38824	16.6425	1.23708	182.853	8.28076	0.398109	18.6347	10.7767	12.1307	342.514	394.928	7.11904		0.641982	3.21069	1.15737	7.8061	49.0132	2.54361	0.0453523		69.1586	1190.86	21.0022	3.70794	11.2183	30.6617	2.70553	53.7439	7.79658	5.51173	8.43289	31.7851		0.657648	65.191	3.32539	31.0842	0.0878502
Set219	35.174	26.9198	21.7895	18.2062		26.2264	21.9763	34.0896	1.21857	2.76867	8.98767	16.2568	1.23708	69.3526	6.72864	0.398109	20.411	10.7767	11.6778	325.79	46.7608	10.7319	36.1001	0.86356	7.64145	0.748717	4.66134	16.0376	2.42025	0.0351795		220.36	1190.86	24.5768	3.99359	8.16582	29.2963	2.6803		7.79658	5.78013	10.254	6.53812		0.817671	14.4007	6.80712	135.867	0.0733301
Set220		26.9198	48.1469	18.2062		23.5144	21.9763	37.0138	0.977652	3.86287	7.49444	15.897	6.41538	183.913	3.99419	0.398109	5.03823		4.17057		394.928	7.78599		0.208484	5.2887	1.15737	4.17741	16.8122	2.54951	0.0251246		70.0343		17.702	3.81162	2.01107	26.7772	3.81476	231.932	7.95833	6.16914	6.976	36.0389		0.657648	40.4402	2.88527	46.0807	0.0791169
Set221	275.957	20.3646	41.8543	18.2062		22.9963	21.9763	46.0037	0.863257	3.72627	6.45339	12.3101	1.19983	182.853	6.02126	0.477056	10.1951		10.7588			9.23735	36.1001	0.294582	5.83287	0.748717	4.48387	15.0673	1.26566	0.0302683		212.423		17.702	3.70794	10.1136	30.6617	2.72223	115.109	8.8037	5.80275	10.254	8.21714		0.817671	40.4402	9.56959	88.2577	0.0733301
Set222			31.3097	26.7334		23.9359	23.9896	39.8408	0.977652	3.43016	8.07451	16.729	5.60193	226.91	7.33111	0.477056	5.03823		2.76687		46.7608	10.7171	36.1001	0.213599	8.91495	1.40399	4.66134	43.9437	2.36562	0.045656		70.91	408.271	17.757	3.70794	2.01107	30.6617	2.6803	53.7439	7.95833	5.78013	7.47142	26.1098		0.408836	19.9756	3.32539	81.7814	0.0733301
Set223	275.957	20.3646	30.8685	24.1697		30.7339	23.7044	46.0037	0.982369	6.30434	7.49444	16.2568	3.69928	69.3526	7.71052	0.756352	14.1954		2.69315			7.11904		0.208484	8.96992	1.15737	5.3891	16.0376	1.83219	0.0543341		69.1586		29.6678	3.64917	2.01107	29.2963	4.23061	268.201	7.79658	5.51173	11.3894	26.1098		2.02031	53.5555	4.76429	88.2577	0.0733301
Set224	162.124	28.7192	31.3097	19.9357		23.5144	20.7764	34.0896	1.07547	3.43016	7.78447	16.729	1.23708	245.804	6.72864	0.537117	18.6115	10.7767	4.17057		394.928	7.11904	36.1001	0.294582	5.83287	2.39417	4.0084	72.7446	2.1158	0.0453523		220.36	408.271	26.395	3.70794	2.01107	73.1548	2.6803	53.7439	8.57751	6.3335	8.58981	8.21714		1.80375	19.9756	2.88527	48.4976	0.0895017
Set225	29.3093	20.3646	21.7895	18.2062		26.3399	18.7967	29.282	0.980235	3.43016	7.42665	15.897	1.17614	69.3526	6.95962	0.537117	18.6115		2.76687	279.021		9.55932	36.1001	0.213599	5.83287	1.39249	4.0084	45.0385	2.54951	0.0351795	221.347	69.1586	1190.86	24.5768	3.70794	9.41665	30.6617	5.55785	222.838	7.72673	5.80275	7.47142	27.6427		0.408836	40.4402	4.52221	31.0842	0.0858704
Set226	35.174	38.6049	24.2137	30.2121		21.4978	21.9763	46.0037	0.980235	2.76867	9.05665	7.63173	5.58206	69.3526	7.21268	0.576594	14.1954		4.17057	279.021	79.0718	7.78599		0.213599	8.96992	1.58113	4.17741	23.8984	1.26566	0.0251246		69.1586	408.271	22.7586	4.02358	7.32979	30.6617	2.6803	53.7439	11.7677	6.2988	10.7653	6.53812		1.53865	43.1557	8.64443	93.9337	0.0844382
Set227		20.3646	39.8356	14.7018		28.9467	18.7967	28.024	1.158	4.70088	8.60937	16.729	1.23708	55.853	19.2924	0.477056	18.6882		7.22234	279.021		10.7319		0.208484	5.83287	1.40399	4.33288	18.4641	1.28637	0.0435683		69.1586	408.271	30.5607	4.27732	6.9524	29.2963	2.70553	282.847	11.7677	5.78013	8.43289	6.53812		0.408836	43.1557	3.32539	108.322	0.0870369
Set228	35.174	28.6497	35.5613	19.9357		23.5144	22.6611	29.282	0.850156	3.43016	9.35015	7.63173	1.19983	173.678	6.72864	0.616071	14.1954		2.76687		46.7608	7.11904	36.1001	0.208484	5.9569	1.15737	4.0084	41.0638	2.54361	0.0302683		69.1586		17.757	3.64917	7.32979	73.1548	3.55941		8.8037	6.3335	7.44762	6.53812		0.657648	19.9756	3.32539	38.5825	0.0733301
Set229		6.43539	30.8685	14.7018		26.3399	21.9763	30.5318	1.02615	3.72627	7.42665	15.897	1.17614	173.678	6.14125	0.398109	10.1951		2.76687		266.343	9.46655	37.8822	0.208484	5.83287	0.748717	4.33288	16.0376	1.26566	0.0523979		70.91		21.0022	3.64917	5.9043	63.2736	5.94819	115.109	12.0446	5.78013	8.43289	28.3715		1.97862	14.4007	4.52221	44.7485	0.0733301
Set230	57.7998	28.7192	48.5531	31.2074		23.5144	23.7044	33.1195	0.982369	5.38904	7.49444	16.2568		69.3526	9.64394	0.398109	8.99574	10.7767	4.17057			7.11904	39.3233	0.230555	6.42234	1.40399	5.18696	23.8984	1.28637	0.0523979	221.347	69.1586	408.271	26.395	3.80381	2.01107	29.2963	3.55941	231.932	7.87746	5.80275	7.0537	31.7851		0.408836	14.4007	2.88527	58.0988	0.0733301
Set231		20.3646	21.7895	14.7018		22.4065	20.7764	34.0896	0.863257	3.43016	5.32383	12.3101	1.19983	183.913	7.71052	0.398109	18.2931		10.2107		46.7608	7.11904	36.1001	0.294582	5.9569	1.15737	4.17741	15.0673	1.26566	0.0402038		70.0343	408.271	22.7586	3.81162	2.01107	48.1872	3.39892	188.202	7.95833	5.63981	5.10641	32.6317		0.408836	14.4007	4.52221	88.2577	0.0895017
Set232		28.6497	21.7895	18.2062		24.3853	27.0311	49.1357	0.942191	5.22704	7.49444	23.7059	1.23708	259.558	6.14125	0.616071	18.2931		2.76687		394.928	7.78599		0.230555	5.2887	0.92433	4.17741	18.3379	2.41969	0.0453523		69.1586	1190.86	28.2983	3.99359	9.18751	29.2963	5.18658	115.109	8.57751	5.80275	7.47142	26.1098		0.408836	21.8759	3.32539	58.0988	0.0733301
Set233	41.5916	36.4746	20.709	27.2075		23.9359	21.9763	32.3979	0.863257	5.73019	7.46054	17.9295	1.50086	173.678	7.21268	0.398109	5.03823		2.76687			6.32316	36.1001	0.213599	5.61405	0.748717	4.48387	23.8984	2.41969	0.0417842		69.1586	1789.52	17.8968	3.99359	5.9043	73.1548	3.75541	115.109	8.57751	5.78013	8.43289	8.21714		0.408836	64.9114	3.32539	58.4128	0.0870369
Set234	181.342	6.43539	41.8543	18.2062		26.3399	21.9763	38.4968	0.977652	3.43016	7.59344	12.3101	1.19983	69.3526	8.28076	0.616071	5.03823	10.7767	12.1307	300.113	46.7608	7.11904	39.3233	0.230555	3.21069	0.748717	4.98034	10.7516	1.26566	0.0453523		220.36	408.271	25.1286	4.69611	7.29413	63.2736	3.39892	53.7439	7.79658	5.80275	10.254	28.3715		0.408836	14.4007	2.88527	26.2761	0.0733301
Set235	251.958	6.43539	64.4337	30.2121		30.123	23.7044	28.024	0.784323	2.76867	9.28229	16.2568	1.50086	259.558	7.21268	0.616071	17.8797		2.76687		46.7608	10.7171	36.1001	0.294582	5.83287	1.15737	5.41668	23.8984	2.28896	0.0402038		70.0343	1789.52	22.7586	4.02358	5.9043	58.5222	2.6803	233.102	8.57751	5.80275	7.45952	6.53812		0.408836	21.8759	4.52221	26.2761	0.0864537
Set236	251.958	6.43539	21.7895	34.968		26.2264	23.7044	34.0896	0.942191	4.7652	7.49444	15.897	5.56411	69.3526	6.14125	0.616071	14.1954		2.76687	279.021	46.7608	7.11904		0.343061	3.21069	1.15737	4.66134	16.0376	1.26566	0.0402038		212.423	1789.52	27.615	3.99359	7.32979	31.0441	2.70553	53.7439	7.66008	5.80275	8.43289	26.1098		0.408836	14.4007	3.32539	26.2761	0.0844382
Set237	275.957	26.9198	21.7895	30.2121		11.973	21.9763	49.1357	0.977652	5.22704	7.49444	7.63173	1.17614	173.678	6.14125	0.398109	10.1951		2.76687	300.113	79.0718	7.11904		0.294582	5.83287	0.92433	4.66134	16.8122	2.54361	0.077282		70.0343	1789.52	40.3583	3.64917	10.7939	30.6617	2.6803	115.109	7.95833	5.78013	8.58981	26.1098		1.80375	21.8759	2.88527	69.3641	0.0733301
Set238	67.3085		31.3097	18.2062		26.2092	25.1042	34.0896	1.07018	4.7652	8.30485	16.2568		384.467	6.14125	0.477056	14.1954		7.76814			7.11904		0.294582	8.62603	1.18812	2.4026	18.3379	2.46969	0.0402038	221.347	69.1586	408.271	25.1286	4.58302	2.01107	50.9824	2.68945	181.018	7.79658	5.51173	10.8707	31.576		0.408836	75.5818	3.32539	58.4128	0.0870369
Set239	38.5003	6.43539	21.7895	30.1919		26.2264	20.7764	32.3979	0.977652	3.43016	8.07451	16.2568	1.29945	182.853	8.28076	0.537117	10.1951		4.17057		46.7608	10.8238		0.208484	3.21069	1.15737	4.0084	16.0376	2.42025	0.0467243	147.759	212.423		23.3304	4.06172	6.9524	25.652	4.29948	222.838	7.65687	6.10755	10.0723	22.0189		0.408836	19.9756	3.32539	26.2761	0.0844382
Set240	113.855	6.43539	31.5962	30.1332		26.2264	22.6611	34.0896	0.977652	5.38904	8.88229	16.9885	1.19983	178.796	3.40529	0.395367	20.7572		4.17057			12.1198		0.208484	5.9569	1.05622	5.61221	16.8122	1.26566	0.0402038		212.423		17.8968	3.75932	7.32979	31.0441	2.6803	181.018	11.4933	5.80275	7.47142	37.6258		0.408836	14.4007	3.32539	26.2761	0.0864537
Set241	251.958	6.43539	62.5719	14.7018		26.2092	21.9763	46.0037	1.02615	3.43016	8.07451	23.7059	1.17614	69.3526	8.36604	0.46671	14.1954		4.17057	342.514		9.23925		0.208484	5.83287	0.92433	6.05945	16.8122	2.54361	0.0453523	147.759	220.36	408.271	27.615	3.07539	2.01107	30.6617	5.39116	233.102	11.7677	5.78013	7.45952	6.53812		0.408836	14.4007	2.88527	58.0988	0.0844382
Set242		6.43539	31.5962	14.7018		26.2264	21.9763	28.024	0.549093	4.70088	7.49444	16.6425	3.69928	69.3526	7.21268	0.398109	14.1954		9.43942	300.113		9.46655	36.1001	0.208484	5.83287	1.18812	10.9713	15.0673	2.28896	0.0251246		69.1586		26.395	4.59169	7.29413	88.2247	4.23061	53.7439	7.79658	6.36088	10.0723	28.3715		0.408836	19.9756	4.76429	73.1132	0.0733301
Set243	41.5916	28.7192	21.7895	30.2121		23.165	20.7764	29.282	0.942191	3.43016	7.49444	7.63173	1.17614	69.3526	5.1065	0.477056	12.4786		2.76687	279.021	46.7608	7.11904	39.3233	0.213599	9.89442	1.15737	2.4026	15.0673	1.26566	0.0402038		220.36	408.271	30.5607	4.09176	8.16582	75.3275	2.6803	53.7439	7.66008	5.63981	10.8707	22.0189		0.817671	14.4007	2.88527	26.2761	0.0844382
Set244	38.5003	6.43539	25.938	14.7018		24.5801	20.7764	34.0896	0.850156	2.76867	7.49444	38.0969	1.23708	221.206	6.14125	0.616071	10.1951	10.7767	2.76687		394.928	9.23735	36.1001	0.208484	5.61405	0.748717	4.0084	45.0385	1.26566	0.0302683		70.0343		23.3304	3.64917	11.097	30.6617	3.55941		10.0265	5.79144	6.976	8.21714		1.71384	14.4007	5.46381	69.3641	0.0733301
Set245	45.2487	28.6497	31.5962	31.2074		26.3399	20.7764	34.0896	0.980235	6.35382	7.49444	16.6425	2.1769	259.558	8.28076	0.398109	21.291	10.7767	2.76687		266.343	7.11904	37.8822	0.230555	5.83287	1.15737	4.17741	16.0376	1.26566	0.0704943	221.347	69.1586	408.271	26.395	5.41311	7.29413	30.6617	2.72223	181.018	11.0926	5.79144	10.4431	8.21714		1.71384	40.4402	4.92448	26.2761	0.0733301
Set246	36.8207	20.3646	46.8896	18.2062		21.4978	21.9763	16.2027	0.784323	4.70088	6.54259	16.2568	4.80438	183.913	11.0779	0.537117	10.1951	3.06696	2.76687	279.021	79.0718	7.11904	37.8822	0.251533	5.83287	0.92433	2.4026	16.8122	1.83219	0.0351795	147.759	69.1586	1789.52	24.5768	3.28053	2.01107	29.2963	3.55941	188.202	7.72673	6.3335	8.43289	28.3715		0.817671	21.8759	4.40396	93.9337	0.0733301
Set247	35.174		31.3097	30.1919		26.2264	22.6611	63.2174	0.942191	5.22704	7.49444	16.0853	8.78981	119.353	6.14125	0.616071	14.2625		2.76687	374.165	79.0718	7.11904		0.230555	5.83287	0.92433	4.0084	32.291	1.26566	0.0302683		69.1586	408.271	22.7586	3.28053	10.7939	29.2963	2.6803	231.932	7.95833	5.80275	6.976	26.1098		0.657648	14.4007	2.88527	26.2761	0.0733301
Set248	41.5916	28.7192	21.7895	14.7018		28.9245	20.7764	32.2555	0.784323	5.22704	7.59344	7.63173	1.19983	69.3526	8.60957	0.477056	21.584		2.76687		46.7608	7.11904		0.294582	5.9569	0.748717	4.98034	32.291	1.26566	0.0351795		70.0343		17.8968	4.02358	6.9524	29.2963	4.96656	53.7439	8.57751	5.63981	7.47142	27.6427		0.408836	14.4007	2.88527	48.4976	0.0844382
Set249	46.3685	28.6497	64.0427	14.7018		23.5144	22.6611	32.3979	0.977652	3.43016	8.07451	7.63173	1.19983	69.3526	8.28076	0.398109	14.1954	10.7767	2.76687			9.46655	37.8822	0.230555	5.9569	1.15737	5.08365	16.0376	2.36562	0.0251246		69.1586	408.271	27.6849	3.70794	2.01107	30.6617	3.75541	115.109	11.7677	7.92488	7.47142	6.53812		0.408836	35.3216	4.52221	26.2761	0.0878502
Set250	46.3685	6.43539	31.3097	30.2121		28.7905	20.7764	32.3979	0.942191	3.72627	7.49444	12.3101	1.17614	178.796	6.72864	0.537117	17.7969		10.7588			10.7319		0.470466	3.21069	0.748717	5.75339	10.7516	2.38351	0.0251246	147.759	164.731	408.271	17.702	3.28053	10.3488	88.2247	3.55941	115.109	8.8037	6.2988	8.43289	28.3715		1.57553	14.4007	3.32539	88.2577	0.0844382
Set251	251.958	33.4449	24.2137	14.7018		22.0102	21.9763	30.5318	0.980235	4.7652	7.49444	12.3101	1.19983	178.796	9.64394	0.398109	10.1951		2.76687		46.7608	7.78599	39.3233	0.213599	5.83287	0.748717	4.33288	41.0638	1.97987	0.0251246	147.759	70.91	408.271	21.0022	3.70794	7.32979	25.652	2.6803	98.0799	8.57751	6.10755	5.10641	26.1098		0.646661	21.8759	3.32539	103.158	0.0733301
Set252	41.5916	6.43539	31.5962	14.7018		22.9963	21.9763	38.4968	0.982369	3.43016	5.42082	7.63173	3.69928	173.678	6.72864	0.616071	14.2625		2.76687	279.021		7.11904	36.1001	0.208484	5.2887	1.18812	2.4026	29.764	2.311	0.0351795				26.395	3.28053	2.01107	66.6309	3.55941	115.109	11.0926	5.79144	10.8707	31.576		0.657648	14.4007	8.51581	58.4128	0.0844382
Set253	67.3085	28.6497	48.5531	14.7018		27.7372	21.9763	38.4968	0.549093	3.43016	7.59344	16.6425	1.23708	183.913	7.21268	0.756352	14.2625		2.76687			7.11904		0.208484	8.96992	1.18812	4.0084	16.0376	1.26566	0.0671363		71.9155	1789.52	24.5768	4.09176	6.9524	62.3633	3.81476	177.672	7.79658	5.78013	10.0723	6.53812		0.817671	40.4402	2.88527	58.4128	0.0882693
Set254		20.3646	49.5943	30.2121		26.2092	20.7764	38.4968	0.980235	3.43016	8.19155	16.9885	4.42534	182.853	7.21268	0.477056	10.1951		10.2107			13.5974		0.294582	8.96992	1.66728	4.0084	47.7364	1.26566	0.045656				27.615	3.84608	2.01107	25.652	2.6803	186.621	11.8283	5.78013	7.47142	6.53812		0.657648	19.9756	5.46381	38.5825	0.0844382
Set255		28.7192	41.8543	14.7018		23.9359	20.7764	33.1195	1.02615	3.72627	6.92441	16.2568	1.23708	245.804	8.36604	0.46671	14.1954	10.7767	8.85429			10.5805	37.8822	0.230555	5.9569	0.92433	4.17741	27.3477	2.69408	0.0351795	147.759	212.423		29.6678	3.70794	12.7551	26.7772	2.6803	115.109	10.0265	5.80275	6.39537	8.21714		0.408836	17.732	2.88527	52.2467	0.0733301
Set256	251.958		62.5719	18.2062		22.9963	25.4361	32.3979	0.977652	4.7652	7.78447	7.63173	1.19983	182.853	6.95962	0.46671	10.1951		12.4877		266.343	10.8238		0.230555	5.9569	1.15737	4.66134	16.0376	2.48488	0.0433572		260.295		21.0022	4.33921	10.3488	29.2963	5.18658	231.932	11.7677	6.10755	6.976	22.0189		0.408836	40.4402	5.94457	88.2577	0.0858704
Set257	37.8389	6.43539	47.6799	14.7018		26.3399	22.8327	37.0138	0.863257	2.76867	7.49444	7.63173	1.17614	274.803	6.14125	0.923336	8.99574		4.17057		84.6622	7.11904		0.343061	5.2887	0.748717	5.18696	16.8122	2.311	0.0402038	211.245	69.1586	408.271	17.757	3.28053	5.9043	30.6617	2.6803	115.109	7.72673	5.63981	10.0723	8.21714		0.408836	14.4007	3.32539	26.2761	0.0733301
Set258	48.2912	28.6497	53.1301	18.2062		23.2586	21.9763	28.024	1.0501	4.78571	8.07451	16.729	4.74873	69.3526	7.21268	0.923336	10.1951		9.43942	279.021		7.11904		0.208484	5.83287	0.748717	2.4026	18.3379	1.26566	0.0251246	147.759	69.1586		25.1286	3.70794	5.9043	48.1872	2.70553	268.201	7.79658	6.10755	10.254	22.0189		0.657648	63.2772	4.52221	26.2761	0.0844382
Set259	35.174	28.6497	53.6595	18.2062		23.5144	27.0558	34.0896	0.850156	3.43016	7.83397	29.2052	5.58206	69.3526	7.71052	0.398109	26.534	10.7767	10.2107		46.7608	7.11904		0.230555	3.21069	1.15737	4.33288	45.0385	1.26566	0.0251246	147.759	70.91		24.5768	3.70794	7.29413	48.1872	5.73862	231.932	8.8037	7.43305	9.61248	26.1098		1.97862	21.8759	2.88527	103.158	0.0733301
Set260	46.3685	36.4746	21.7895	14.7018		27.4722	22.6611	39.1416	0.980235	3.57822	6.45339	17.9295	1.17614	69.3526	8.36604	0.74285	14.1954		7.14862	342.514		9.51294		0.213599	3.21069	1.15737	2.4026	16.8122	1.28637	0.0402038	164.279	70.91		22.7586	3.64917	2.01107	73.1548	3.81476	75.2944	7.79658	5.79144	8.43289	31.576		1.91179	66.3359	2.88527	46.0807	0.0844382
Set261	171.633		30.8685	18.2062		26.2264	26.0828	29.282	1.18961	3.72627	6.92441	16.2568	1.17614	69.3526	8.60957	0.398109	20.7572		2.76687			7.11904	39.3233	0.213599	8.68369	0.748717	7.8061	16.8122	2.60502	0.0302683		220.36		24.5768	4.27732	7.32979	26.7772	2.72223	53.7439	16.82	6.3335	8.43289	26.1098		0.408836	14.4007	4.40396	130.436	0.0895017
Set262	35.174	6.43539	30.8685	18.2062		28.7905	20.7764	38.4968	0.863257	3.86287	7.59344	16.9885	1.73818	178.796	7.21268	0.398109	18.6115	10.7767	2.76687	300.113	79.0718	9.46655	36.1001	0.213599	8.62603	1.18812	2.4026	16.0376	1.26566	0.0402038		71.9155		17.3768	5.21549	2.01107	25.652	2.70553	115.109	7.72673	5.51173	10.0723	31.7851		0.408836	14.4007	7.19645	46.0807	0.0882693
Set263	45.8086	37.9099	22.4613	14.7018		11.973	21.9763	32.9922	0.863257	3.43016	7.51004	15.897	5.58206	183.913	9.64394	0.46671	14.2625		2.76687	279.021	79.0718	7.78599		0.25409	5.2887	1.15737	4.33288	16.0376	2.36562	0.0351795	211.245	69.1586		21.0022	3.05974	11.5191	58.5222	3.81476	245.125	7.79658	5.51173	6.976	26.1098		0.408836	63.2772	3.32539	26.2761	0.0878502
Set264	275.957	6.43539	47.6499	14.7018		26.3399	26.0286	28.024	0.863257	3.22714	8.07451	16.2568	1.19983	173.678	6.84199	0.398109	14.1954		2.76687		266.343	9.46655	36.1001	0.213599	5.9569	0.92433	4.81939	10.7516	2.46969	0.0251246		69.1586	1789.52	30.2846	3.99359	5.9043	29.2963	2.70553	268.201	7.95833	5.78013	7.45952	6.53812		0.408836	14.4007	3.32539	93.9337	0.0844382
Set265			31.5962	30.2121		21.4978	20.7764	32.2555	0.863257	4.10794	8.07451	18.336	1.23708	69.3526	14.4127	1.01092	19.7384		2.76687			7.11904		0.343061	8.91495	1.15737	4.17741	27.3477	2.23818	0.0417842		70.0343		27.6849	4.06172	8.16582	66.6309	2.70553		13.9563	5.78013	7.44762	26.1098		2.35915	40.4402	4.76429	81.7814	0.0844382
Set266	37.8389	6.43539	48.1469	14.7018		26.2264	22.6611	46.0037	0.863257	3.72627	6.54259	17.9295	1.73818	119.353	7.21268	0.398109	18.6882		2.76687			7.78599		0.294582	5.83287	1.18812	2.4026	16.8122	2.36562	0.0251246		69.1586	408.271	22.7586	3.70794	7.14109	31.0441	3.91301	115.109	8.8037	5.80275	10.0723	27.6427		2.35915	53.5555	3.32539	26.2761	0.0844382
Set267		6.43539	30.8685	18.2062		23.5144	22.6611	48.3083	0.942191	3.72627	5.92884	7.63173	1.19983	173.678	6.49766	0.477056	12.3961		2.76687			7.11904	36.1001	0.505343	3.21069	0.748717	4.0084	32.291	2.311	0.0351795	221.347	70.91		21.0022	3.84608	7.32979	25.652	2.68945	188.202	8.8037	6.53499	7.47142	28.3715		0.408836	21.8759	7.19645	88.2577	0.0844382
Set268	35.174	6.43539	30.8685	30.1332		22.9963	20.7764	29.282	0.980235	3.77719	5.21587	16.0853	1.17614	119.353	12.7486	0.398109	14.1954		7.22234	279.021		10.7171	39.3233	0.25409	8.91897	0.748717	7.07956	16.8122	2.0633	0.0351795		69.1586	408.271	26.395	3.70794	2.01107	25.652	4.96656	231.932	8.8037	5.80275	8.58981	8.21714		0.817671	14.4007	2.88527	88.2577	0.0864537
Set269	251.958		30.8685	14.7018		22.9963	22.8327	34.0896	0.863257	6.61367	7.59344	15.897	1.17614	259.558	8.36604	0.398109	16.0309	10.7767	2.76687		266.343	11.1001	36.1001	0.230555	6.42234	1.18812	6.82496	23.8984	2.311	0.0251246		212.423	408.271	22.7586	3.99359	2.01107	26.7772	2.70553	177.672	9.44459	6.10755	9.61248	31.7851		2.06332	19.9756	13.1635	88.2577	0.0844382
Set270		33.4449	31.5962	14.7018		23.5144	21.9763	26.974	0.980235	3.72627	7.49444	15.897	1.49295	183.913	9.64394	0.616071	10.1951		8.85429	279.021	46.7608	7.11904	37.8822	0.208484	6.42234	1.59568	5.79787	29.764	1.28637	0.0302683		220.36	408.271	28.2983	3.84608	2.01107	25.652	2.6803	115.109	11.0926	5.78013	10.3087	8.21714		1.05943	74.3866	2.88527		0.0870369
Set271		28.6497	21.7895	18.2062		21.9528	18.7967	29.282	0.784323	3.43016	7.49444	16.2568	1.50086	253.726	6.14125	0.398109	10.1951		2.61943		79.0718	6.32316		0.25409	5.2887	1.58113	4.17741	16.0376	2.38692	0.0302683	147.759	212.423		21.0022	2.15519	9.66449	26.7772	2.6803	53.7439	11.8283	5.78013	8.58981	26.1098		0.657648	40.4402	5.00636	38.5825	0.0876861
Set272		28.6497	49.5943	18.2062		26.2264	22.6611	34.0896	0.784323	6.30434	7.49444	23.7059	4.80438	119.353	8.36604	0.398109	10.1951		2.76687		79.0718	7.78599		0.294582	5.2887	1.15737	6.05945	16.0376	1.26566	0.0385853		69.1586	1789.52	17.757	3.81162	9.66449	66.6309	2.6803		2.95501	5.78013	10.0723	6.53812		1.32948	44.1059	5.69468	26.2761	0.0844279
Set273	35.174	36.7565	59.4655	14.7018		26.2092	20.7764	29.282	0.850156	4.78571	7.42665	7.63173	4.74873	173.678	7.78936	0.477056	14.1954		2.76687	279.021		7.11904	37.8822	0.208484	7.64145	0.748717	4.17741	33.7386	1.26566	0.0302683		70.91		21.0022	4.27732	2.01107	63.2736	3.39892	268.201	7.66008	4.72465	10.4431	33.2472		0.657648	74.858	5.00636	26.2761	0.0733301
Set274	41.5916	6.43539	21.7895	19.9357		24.2355	20.7764	28.024	0.942191	3.72627	7.49444	16.2568	2.1769	119.353	10.4495	0.910391	12.3961		10.2107			7.11904		1.28234	5.2887	1.15737	2.4026	16.0376	2.42025	0.0302683		69.1586	408.271	21.0022	3.64917	8.16582	30.6617	3.75541	231.932	7.87746	6.10755	10.8707	31.576		2.02031	62.6281	4.76429	26.2761	0.0733301
Set275		20.3646	21.7895	18.2062		26.3399	21.9763	78.3251	0.863257	3.43016	7.49444	15.897	1.50086	178.796	6.14125	0.537117	14.1954	10.7767	2.76687	279.021	46.7608	7.11904		0.208484	5.83287	0.748717	5.75339	43.9437	1.26566	0.0417842	221.347	212.423		24.5768	3.05974	6.9524	26.7772	2.6803	53.7439	7.95833	5.78013	8.43289	6.53812		1.57553	14.4007	5.00636	52.2467	0.0733301
Set276	44.6829	20.3646	64.0427	29.6301		27.7372	21.9763	33.1195	1.03907	2.76867	7.42609	12.3101	1.19983	119.353	6.14125	0.398109	10.1951		7.22234	279.021		10.1156		0.208484	8.68369	1.18812	2.4026	38.5519	2.71067	0.0402038		69.1586	1789.52	17.702	3.70794	5.9043	88.0733	4.23061	115.109	8.57751	5.78629	13.0974	40.8264		0.408836	62.6281	2.88527	88.2577	0.0851543
Set277			21.7895	14.7018		23.9359	22.6611	33.1195	0.977652	2.76867	7.42665	16.2568	3.69928	182.853	6.14125	0.756352	5.03823		2.76687			9.55932	36.1001	0.208484	5.2887	1.18812	4.0084	24.0335	2.36562	0.0251246		69.1586	408.271	23.3304	3.64917	7.14109	48.1872	2.68945	115.109	7.75641	5.78629	6.976	36.0389		1.71384	19.9756	4.92448	31.0842	0.0844382
Set278	41.5916		48.1469	30.2121		26.3399	22.8749	28.024	0.863257	3.43016	7.42665	15.897	1.49295	69.3526	12.3956	0.398109	16.9108		2.76687			7.11904	36.1001	0.230555	5.9569	1.15737	4.17741	16.8122	2.46969	0.0402038	221.347	69.1586		25.1286	3.28053	6.9524	73.1548	3.39892	183.807	8.8037	5.51173	10.254	31.7851		1.05943	14.4007	2.88527	58.4128	0.0844382
Set279	124.325		21.7895	18.2062		29.248	21.9763	33.1195	0.863257	3.57822	6.97391	18.336	5.56411	228.828	6.72864	0.616071	14.1954		12.7515			9.23735		0.208484	3.21069	0.748717	2.4026	46.2461	1.26566	0.0453523		70.91		22.7586	4.59169	5.9043	48.1872	2.6803	231.932	7.79658	5.78013	8.58981	8.21714		1.93322	17.732	7.19645	88.2577	0.0844382
Set280	35.174	6.43539	31.5962	14.7018		26.2264	21.9763	33.1195	0.977652	4.78571	7.39543	16.729	1.73818	69.3526	6.72864	0.922596	14.1954		2.76687	279.021		9.47711	37.8822	0.213599	3.21069	1.15737	4.0084	16.8122	2.54361	0.0417842		171.69	1190.86	28.0829	3.64917	5.9043	30.6617	2.6803	226.99	8.91785	5.78013	10.3087	27.6427		1.57553	14.4007	4.52221	108.322	0.0844382
Set281	53.7783	6.43539	31.5962	14.7018		26.2264	26.1852	34.0896	1.07547	3.43016	7.42665	7.63173	7.72021	69.3526	8.28076	0.398109	14.1954		7.22234	279.021	46.7608	9.46655		0.213599	8.91495	1.18812	4.98034	27.3477	1.26566	0.0543341		338.161	408.271	29.2034	3.77153	9.66575	66.6309	5.08892	53.7439	7.66008	5.78013	6.976	6.53812		0.408836	21.8759	3.32539	81.7814	0.0844279
Set282	275.957	6.43539	30.8685	19.9357		23.5144	20.7764	32.2555	0.977652	1.4214	5.21587	16.6425	1.73818	69.3526	8.36604	0.398109	18.6347		2.76687	325.79	79.0718	10.7319	36.1001	0.208484	3.21069	1.15737	5.41668	16.8122	2.54361	0.0351795	211.245	69.1586	408.271	17.757	3.70794	7.32979	30.6617	5.18658	53.7439	8.57751	5.80275	7.0537	27.6427		0.657648	53.5555	4.52221	26.2761	0.0844382
Set283	35.174	20.3646	31.3097	14.7018		32.5106	20.7764	46.0037	0.980235	2.76867	7.39543	7.63173	5.60193	69.3526	6.14125	0.477056	5.03823		2.76687	279.021	79.0718	7.78599	36.1001	0.470466	3.21069	1.8775	4.17741	16.0376	1.26566	0.0417842		69.1586		17.702	3.70794	11.1188	88.0733	2.6803	53.7439	8.57751	5.78013	8.58981	6.53812		0.408836	21.8759	3.32539	58.4128	0.0733301
Set284	39.9284	28.6497	21.7895	30.2121		24.2355	20.7764	16.2027	0.980235	3.77719	7.08655	7.63173		69.3526	9.64394	0.686211	14.1954	10.7767	2.76687	300.113	79.0718	7.11904		0.359521	3.21069	0.92433	4.0084	68.5938	2.23818	0.0351795		69.1586		22.7586	3.64917	7.32979	31.0441	2.68945	231.932	10.0265	5.80275	8.43289	24.7138		1.05943	19.9756	4.92448	46.0807	0.0733301
Set285	35.174	26.9198	21.7895	30.1919		24.3853	21.9763	29.282	0.942191	3.43016	7.59344	12.3101	1.19983	178.796	6.14125	0.756352	5.03823		2.76687	300.113	46.7608	7.78599		0.208484	5.2887	1.15737	4.98034	43.9437	2.25618	0.0417842	147.759	69.1586		26.395	3.70794	6.9524	88.0733	2.6803	77.02	8.8037	6.16914	7.0537	6.53812		0.408836	44.1059	2.88527	38.5825	0.0733301
Set286	35.174	31.6652	25.3164	14.7018		22.0102	22.6611	21.8579	1.02615	3.43016	6.45339	15.897	1.49295	69.3526	8.36604	0.923336	5.03823		8.09591		46.7608	9.00815	36.1001	0.213599	5.83287	0.748717	4.0084	45.0385	1.28637	0.0402038		69.1586		23.0654	3.28053	8.16582	26.7772	2.6803	53.7439	8.91785	5.78629	6.976	26.1098		0.408836	53.5555	2.88527	93.9337	0.0878502
Set287	57.7998	28.6075	35.5613	14.7018		26.2264	20.7764	29.282	0.863257	2.76867	8.07451	15.897	1.23708	173.678	6.72864	0.398109	12.3961		12.2236			7.78599	36.1001	0.208484	5.9569	1.05622	4.48387	27.3477	1.26566	0.0302683		69.1586		17.757	4.9102	8.16582	26.7772	2.70553	53.7439	7.79658	5.80275	10.254	36.8886		0.408836	40.4402	3.32539	26.2761	0.0844382
Set288	171.633	20.3646	31.5962	18.2062		26.3399	22.6611	34.0896	0.927279	1.4214	7.42665	16.4929	1.17614	173.678	6.14125	0.398109	12.3961	10.7767	12.7694			6.32316	39.3233	0.343061	7.20538	0.92433	4.48387	53.0703	1.28637	0.0302683	147.759	69.1586	408.271	31.0811	3.70794	7.32979	29.2963	2.6803	98.0799	9.44459	4.72465	11.3894	27.6427		1.93322	53.5555	5.94457	31.0842	0.0733301
Set289	251.958	6.43539	31.5962	14.7018		23.5144	26.1852	32.3979	0.977652	2.76867	7.59344	7.63173	1.19983	173.678	8.60957	0.398109	10.1951	10.7767	14.5101		79.0718	7.78599	36.1001	0.230555	5.9569	0.92433	4.17741	23.8984	2.54702	0.0351795	147.759	338.161		27.6849	3.81162	9.66449	48.1872	3.81476	115.109	7.79658	6.3335	10.0723	6.53812		0.657648	19.9756	4.40396	103.158	0.0844382
Set290	41.5916	28.6497	35.5613	34.6046		23.5144	21.9763	29.282	0.942191	3.43016	7.59344	15.897	1.17614	183.913	6.14125	0.398109	17.1811		10.2107			10.7171	36.1001	0.25409	3.21069	0.748717	4.66134	16.0376	2.36562	0.0351795	147.759	164.731		23.3304	3.28053	5.9043	30.6617	5.08892		2.95501	6.3335	6.976	6.53812		0.657648	19.9756	5.5812	26.2761	0.0876861
Set291	29.3093	6.43539	31.3097	31.2074		26.3399	18.7967	38.4968	0.863257	5.94591	9.06921	43.7841	1.73818	183.913	7.41867	0.537117	14.2625	10.7767	4.33957			7.11904		0.213599	5.83287	0.748717	4.0084	23.8984	2.64937	0.0467243	221.347	212.423		34.1742	3.28053	6.9524	73.1548	5.08892		8.8037	5.78013	8.58981	6.53812		0.657648	66.3359	5.00636	46.0807	0.0844382
Set292	251.958	26.4087	31.3097	30.1332		26.3399	21.9505	33.841	0.549093	3.43016	5.99084	16.0853	1.23708	317.217	10.9182	0.686211	8.99574	10.7767	4.17057			9.46655	37.8822	0.86356	5.2887	1.15737	2.4026	16.0376	1.26566	0.0433572		69.1586	408.271	31.0372	4.06172	8.75683	29.2963	3.39892	115.109	7.66008	6.53499	10.0723	6.53812		0.408836	14.4007	3.32539	26.2761	0.0844382
Set293	41.5916	6.43539	31.5962	18.2062		26.3399	21.9505	32.3979	0.977652	3.72627	8.69694	18.336	3.69928		6.49766	0.398109	5.03823		2.76687			7.11904	37.8822	0.208484	5.2887	0.748717	2.4026	16.0376	2.36562	0.0251246		69.1586		17.757	3.70794	2.01107	81.7761	2.70553	115.109	7.95833	6.53499	9.61248	6.53812		0.817671	89.3791	7.19645	88.2577	0.0844279
Set294	45.8086	26.9198	31.3097	19.9357		29.248	20.7764	28.024	0.980235	3.72627	7.59344	16.729	1.49295	69.3526	5.1065	0.477056	17.8797		12.2236			9.47711	36.1001	0.208484	8.91495	1.15737	5.61221	29.764	2.63276	0.0402038		69.1586		26.395	3.28053	2.01107	26.7772	2.6803	226.99	7.87746	5.79144	12.6891	31.576		0.408836	14.4007	3.32539	86.3744	0.0844382
Set295	67.3085	36.2953	48.5531	18.2062		22.9963	22.6611	34.0896	0.980235	3.43016	8.46268	7.63173	1.23708	253.726	7.33111	0.537117	10.1951	10.7767	15.132		46.7608	7.78599	37.8822	1.21986	5.83287	0.92433	2.4026	53.0703	1.26566	0.0302683		69.1586	1789.52	27.6849	3.81162	7.14109	30.6617	3.39892	181.018	7.87746	5.80275	7.47142	31.576		0.817671	14.4007	7.19645	26.2761	0.0733301
Set296	251.958	28.6497	21.7895	27.1919		26.2264	20.7764	26.974	0.977652	2.76867	8.07451	16.2568	1.17614	69.3526	6.14125	0.616071	5.03823		2.76687		266.343	7.11904	39.3233	0.294582	3.21069	1.18812	4.66134	16.0376	1.28637	0.0417842	221.347	69.1586		25.1286	4.4242	6.9524	29.2963	2.68945	115.109	7.95833	5.80275	9.02068	6.53812		0.408836	14.4007	4.40396	31.0842	0.0876861
Set297	38.3828	25.0538	21.7895	31.0361		22.9963	22.8327	26.974	0.977652	4.70088	7.73497	16.2568	1.49295	69.3526	8.36604	0.477056	8.99574	10.7767	9.43511			7.11904		0.208484	8.68369	1.18812	2.4026	15.0673	1.26566	0.0671363		78.1269	408.271	17.702	3.64917	2.01107	58.5222	3.55941	53.7439	7.44635	5.80275	6.976	6.53812		0.646661	66.3359	2.88527	76.0162	0.0870729
Set298	275.957	28.6497	47.6799	14.7018		26.2264	20.7764	33.2478	1.32988	5.22704	7.59344	24.1388	1.17614	221.206	6.14125	0.398109	5.03823		2.76687		46.7608	7.78599	37.8822	0.208484	3.21069	1.15737	2.4026	16.8122	2.42025	0.0302683		69.1586	1789.52	23.3304	3.28053	2.01107	48.1872	2.68945	53.7439	12.3892	5.63981	6.976	32.6317		1.57553	14.4007	7.95842	26.2761	0.0844382
Set299	35.174	6.43539	25.938	31.2074		21.4978	21.9763	34.0896	1.01846	3.43016	7.49444	45.062	9.87632	182.853	6.14125	0.46671	14.2625		2.76687	359.238	79.0718	7.11904	36.1001	0.294582	8.68369	0.748717	4.17741	34.0688	1.26566	0.0402038		69.1586	408.271	17.702	3.05974	7.14109	73.1548	2.6803	115.109	7.79658	5.79144	9.61248	36.1513		0.657648	14.4007	4.40396	26.2761	0.0733301
Set300	57.7998	38.6049	31.5962	14.7018		25.2309	25.1042	28.024	0.863257	3.43016	8.46268	16.2568	1.17614	69.3526	9.64394	0.398109	16.9057		13.6864	300.113	79.0718	7.11904	39.3233	0.294582	8.91495	0.92433	5.18696	16.8122	2.63276	0.0417842		69.1586	1190.86	28.2983	3.70794	2.01107	29.2963	5.96748	189.435	7.72673	5.79144	6.99172	36.8886		0.408836	19.9756	4.76429	38.5825	0.0844382
Set301	41.5916	28.6497	24.2137	30.1919		23.9359	21.9763	44.9554	0.942191	2.76867	7.49444	7.63173	5.60193	69.3526	8.28076	0.616071	5.03823		2.76687	279.021		7.11904	37.8822	0.208484	5.83287	0.92433	4.17741	16.0376	1.26566	0.0251246		69.1586		34.1742	3.81162	7.29413	66.6309	3.81476		8.57751	5.80275	10.254	8.21714		0.817671	63.2772	2.88527	58.0988	0.0733301
Set302	251.958	26.9198	21.7895	14.7018		23.9359	22.6611	33.1195	0.850156	3.72627	8.98767	7.63173	4.74873	182.853	7.21268	0.537117	14.1954		10.2107		79.0718	9.55932		0.213599	5.83287	0.92433	4.48387	53.0703	2.41969	0.0402038		220.36		24.2295	3.70794	2.01107	29.2963	3.81476	115.109	7.65687	5.80275	7.47142	27.6427		1.80375	63.2772	3.32539	26.2761	0.0733301
Set303	114.816	20.3646	48.5531	19.9357		23.5144	26.1852	33.841	0.942191	3.43016	7.49444	16.0853	1.17614	182.853	7.21268	0.398109	12.3961		13.6864		46.7608	7.78599		0.343061	5.9569	1.15737	4.49711	43.9437	2.42025	0.0251246		70.0343		31.0372	3.70794	2.01107	66.6309	2.6803	115.109	7.79658	5.78013	10.254	6.53812		0.657648	14.4007	5.94457	88.2577	0.0844382
Set304	57.7998	28.7192	21.7895	18.2062		23.9359	22.8327	32.3979	0.980235	4.70088	8.07451	7.63173	1.19983	119.353	7.21268	0.616071	5.03823		2.76687		79.0718	7.78599		0.208484	5.2887	0.748717	5.61221	10.7516	2.46969	0.0251246		70.91		23.3304	3.99359	6.9524	66.6309	2.6803	53.7439	7.79658	4.72465	7.44762	31.7851		1.71384	14.4007	4.92448	116.483	0.0857375
Set305	35.174	25.0538	31.5962	30.2121		21.4978	25.1042	32.2555	0.863257	5.38904	7.59344	16.9885	1.73818	69.3526	6.14125	0.756352	18.6115		4.17057	279.021	266.343	9.46655	36.1001	0.208484	5.83287	1.15737	5.79787	32.291	2.41969	0.0302683		69.1586		26.395	4.8614	7.29413	30.6617	2.68945	181.018	8.57751	5.63981	8.58981	8.21714		0.817671	19.9756	2.88527	48.4976	0.0870369
Set306	35.174		25.938	14.7018		23.9359	23.7044	49.1357	0.549093	3.43016	8.0618	18.336	1.49295	55.853	11.0779	0.756352	12.3961		12.7515		266.343	7.11904	39.3233	0.343061	5.83287	0.748717	5.4126	32.291	2.36562	0.0251246	147.759	69.1586	408.271	24.5768	3.28053	9.66449	73.1548	2.6803	177.672	7.95833	5.63981	10.254	31.576		0.408836	21.8759	3.32539	38.5825	0.0876861
Set307	48.2912	6.43539	25.938	18.2062		24.5801	22.8749	32.2555	0.784323	3.72627	8.07451	16.2568	1.17614	274.803	7.33111	0.475992	16.6789	10.7767	10.2107		46.7608	12.1198		0.427333	8.96992	1.15737	5.79787	23.8984	1.26566	0.064592	221.347	70.0343		26.395	3.77153	2.01107	29.2963	4.96656	231.932	7.79658	5.78013	10.0723	6.53812		1.71384	14.4007	3.32539	26.2761	0.0804162
Set308	36.8207	28.6497	48.1469	18.2062		21.4978	22.6611	49.7816	1.07547	5.22704	7.49444	17.2964	1.17614	182.853	6.72864	0.756352	10.1951		2.76687			7.11904	36.1001	0.213599	5.83287	1.15737	4.48387	18.3379	2.32183	0.0385853		250.664		27.615	4.8614	7.29413	29.2963	5.15502		11.0926	5.78629	6.976	40.2109		0.408836	14.4007	2.88527	159.72	0.0870369
Set309		6.43539	48.5531	14.7018		26.3399	21.9763	32.3979	0.977652	3.72627	7.42665	16.6425	7.72021	183.913	6.14125	0.477056	5.03823		4.17057	279.021	84.6622	9.55932	36.1001	0.208484	5.2887	1.8775	4.48387	47.7364	1.26566	0.0351795	221.347	264.565	408.271	21.0022	3.84608	5.9043	77.7759	3.55941	115.109	10.7549	4.72465	8.43289	8.21714		0.817671	40.4402	5.46381	38.5825	0.0844382
Set310	275.957	28.7192	48.1469	18.2062		24.507	20.7764	21.8579	0.980235	2.76867	8.98767	16.2568	1.50086	183.913	6.14125	0.686211	14.2625		13.0007		79.0718	7.78599	36.1001	0.208484	6.42234	0.92433	4.0084	50.4034	1.78833	0.0385853		212.423	1789.52	17.757	3.64917	10.3488	26.7772	4.23061		7.79658	5.78013	7.44762	8.21714		2.49195	62.6281	5.46381	83.0284	0.0844279
Set311	46.3685	26.9198	47.6499	35.656		26.2264	26.0828	16.2027	1.158	2.76867	4.38824	18.336	1.49295	259.558	7.41867	0.477056	17.8797		10.2107			7.11904	37.8822	0.294582	5.83287	0.92433	4.17741	29.764	2.41969	0.0302683		69.1586		17.8968	4.4242	2.01107	29.2963	2.6803	231.932	7.95833	5.63981	6.976	26.1098		0.408836	19.9756	3.32539	38.5825	0.0733301
Set312	46.3685	33.2798	21.7895	27.1919		22.9963	21.9763	32.9922	0.863257	3.43016	7.59344	12.3101	1.19983	69.3526	8.28076	0.398109	10.1951	10.7767	2.76687	300.113		9.46655	37.8822	0.213599	5.83287	1.15737	4.17741	16.8122	2.12622	0.0351795		69.1586	408.271	21.0022	4.06172	7.14109	48.1872	3.75541	222.838	8.8037	4.72465	7.47142	6.53812		0.408836	53.5555	4.40396	58.4128	0.135198
Set313	37.8389	28.6497	21.7895	30.2121		23.5144	20.7764	34.0896	1.07547	3.72627	7.51004	16.2568	1.73818	69.3526	7.71052	0.398109	5.03823	10.7767	11.6778			9.51294	37.8822	0.294582	5.83287	0.92433	4.17741	16.8122	2.311	0.0402038		69.1586	408.271	31.6616	4.41164	2.01107	29.2963	2.6803	188.202	7.87746	5.79144	8.43289	27.6427		0.817671	14.4007	4.52221	58.4128	0.0733301
Set314	35.174		26.4191	14.7018		26.2264	20.7764	32.3979	0.977652	2.76867	8.30485	16.9885	1.50086	69.3526	6.14125	0.756352	14.1954		16.2508		79.0718	7.11904		0.230555	8.98037	1.15737	4.0084	29.764	1.28637	0.0251246	147.759	69.1586	408.271	24.5768	4.5084	2.01107	25.652	5.39116	115.109	8.57751	5.63981	7.0537	26.1098		0.408836	14.4007	4.40396	38.5825	0.0844279
Set315	35.174	51.9164	31.3097	18.2062		26.2264	25.4361	29.282	0.942191	4.65022	6.23137	7.63173	5.60193	69.3526	3.99419	0.537117	18.6347		7.22234	279.021		9.47711		0.213599	8.55377	0.748717	2.4026	16.8122	1.93274	0.0543341	221.347	70.91		31.0372	3.05974	5.9043	29.2963	2.6803	53.7439	7.95833	4.72465	7.44762	26.1098		0.657648	63.2772	5.69468	38.5825	0.0929287
Set316	45.2487		21.7895	30.1332		26.2264	21.9505	38.4968	0.980235	5.22704	7.59344	7.63173	1.19983	182.853	8.0922	0.398109	14.2625	10.7767	10.7588			7.11904	36.1001	0.86356	7.32029	0.748717	4.0084	41.0638	1.26566	0.0351795	221.347	69.1586	408.271	27.615	4.01121	2.01107	29.2963	4.23061	53.7439	8.57751	5.79144	12.6891	27.6427		0.817671	19.9756	2.88527	26.2761	0.0870369
Set317		6.43539	21.7895	18.2062		26.2264	21.9763	31.9261	0.977652	3.43016	7.49444	15.897	1.17614		7.41867	0.398109	5.03823	10.7767	2.76687		79.0718	7.11904		0.470466	3.21069	0.748717	4.48387	18.3379	1.26566	0.0302683		69.1586	1789.52	17.702	3.70794	2.01107	30.6617	3.55941	188.202	7.95833	6.3335	7.47142	6.53812		0.657648	64.9114	4.52221	26.2761	0.0733301
Set318	36.8207	28.7192	21.7895	31.2074		24.3853	21.9763	25.4157	0.982369	3.43016	8.46268	15.897	1.17614	69.3526	8.36604	0.50709	14.2625	10.7767	2.76687	300.113		7.78599	37.8822	0.208484	3.21069	0.748717	4.17741	49.0132	1.28637	0.0351795		70.91	408.271	17.757	4.27732	2.01107	31.0441	2.70553	53.7439	8.8037	5.51173	6.976	6.53812		0.408836	14.4007	3.32539	135.867	0.0767362
Set319	39.2062	28.7192	25.3164	14.7018		22.9963	21.9763	28.024	1.02615	4.70088	5.21587	15.897	1.73818	182.853	7.33111	0.398109	18.6115	10.7767	11.6778		79.0718	9.55932	36.1001	0.213599	5.2887	1.58113	4.17741	47.7364	1.26566	0.0302683		69.1586		25.1286	3.99359	6.9524	25.652	3.39892	115.109	7.72673	5.78013	8.58981	8.21714		0.408836	40.4402	3.32539	58.4128	0.0844382
Set320	41.5916	28.7192	47.6499	30.1919		26.3399	22.8327	32.6782	0.784323	3.43016	8.07451	16.2568	1.17614	263.989	7.71052	0.616071	16.3865		4.17057			10.688	39.3233	0.208484	3.21069	1.59568	6.82496	16.0376	1.26566	0.0453523		70.0343		24.5768	4.27732	7.29413	48.1872	3.39892		7.66008	5.78013	10.254	27.6427		0.817671	14.4007	2.88527	26.2761	0.0844382
Set321	38.5003	28.6497	21.7895	14.7018		23.165	21.9505	29.282	0.784323	3.72627	8.30485	16.729	6.06591	69.3526	3.99419	0.616071	5.03823		11.6778	279.021	46.7608	7.11904		0.470466	8.68369	1.15737	4.17741	16.8122	2.36562	0.0351795	147.759	71.9155		24.2295	3.77153	5.9043	48.1872	4.2666	53.7439	7.79658	5.80275	7.0537	36.8886		1.57553	74.3866	4.53049	93.9337	0.0733301
Set322	35.174	6.43539	21.7895	14.7018		24.5801	22.8749	29.282	0.863257	3.43016	7.49444	15.897	2.1769	182.853	3.99419	0.477056	16.3865	10.7767	12.7515		46.7608	9.46655	36.1001	0.208484	8.68369	1.15737	4.66134	16.8122	1.28637	0.0402038	147.759	212.423		29.6678	2.05776	7.32979	66.6309	3.77702	53.7439	7.87746	6.3335	11.3894	8.21714		0.657648	68.3469	9.56959	173.208	0.0844279
Set323	41.5916	6.43539	45.2074	14.7018		26.2264	23.7044	38.4968	0.980235	4.70088	7.59344	18.336	6.06591	69.3526	6.14125	0.398109	20.456		7.22234	342.514	46.7608	10.7319	37.8822	0.213599	8.81237	1.15737	4.0084	64.4429	2.41969	0.0565236	221.347	269.925		28.2983	3.70794	6.9524	30.6617	2.6803	189.435	8.57751	5.80275	7.47142	26.1098		0.817671	14.4007	5.94457	390.472	0.0733301
Set324	37.8389	6.43539	31.5962	31.619		26.2264	20.7764	22.9363	0.942191	3.72627	7.46054	22.5511	1.17614	69.3526	7.33111	0.756352	16.3865		2.76687	279.021		9.46655	37.8822	0.470466	5.83287	0.92433	4.0084	41.0638	2.311	0.0251246		69.1586	408.271	28.2983	3.84608	8.16582	66.6309	2.70553	115.109	7.87746	5.78013	7.47142	31.576		0.408836	66.3359	4.76429	26.2761	0.0844382
Set325	48.2912	6.43539	39.9299	18.2062		23.5144	22.6611	32.2555	0.980235	5.22704	7.49444	12.3101	1.19983	178.796	6.14125	0.756352	16.6179		2.76687	279.021	79.0718	7.78599	36.1001	0.359521	3.21069	0.748717	6.82496	16.8122	1.28637	0.0402038		69.1586		17.757	3.64917	5.9043	30.6617	5.15502	222.838	7.66008	5.80275	10.254	6.53812		0.817671	14.4007	4.92448	103.158	0.0878502
Set326	251.958	28.7192	21.7895	18.2062		22.9963	22.8327	39.2694	0.850156	4.79185	8.98767	16.6425	1.49295	267.18	8.60957	0.398109	5.03823		12.7694		46.7608	7.11904		0.208484	5.2887	1.56506	4.0084	31.7513	1.28637	0.045656		70.0343		17.757	3.64917	10.3488	73.1548	2.6803	179.624	7.4253	5.63981	10.0723	8.21714		1.71384	63.2772	2.88527	130.436	0.0851543
Set327	45.2487		21.7895	31.2074		23.2586	20.7764	33.1195	0.942191	4.7652	8.31933	16.2568	1.23708	182.853	6.14125	0.724461	14.1954		10.7588		266.343	9.46655	37.8822	0.208484	8.91495	2.03072	5.4126	15.0673	2.1158	0.0402038		71.9155	1190.86	36.0099	4.8614	11.097	29.2963	2.6803	53.7439	8.57751	5.78013	10.254	8.21714		0.817671	40.4402	2.88527	26.2761	0.124267
Set328	44.6829	6.43539	24.2137	30.1332		26.2264	22.8327	46.0037	0.942191	3.72627	7.42665	16.6425	1.23708	182.853	6.95962	0.398109	5.03823		2.76687	279.021		9.46655	36.1001	0.470466	3.21069	1.15737	4.17741	23.8984	1.26566	0.0351795		69.1586	1190.86	23.3304	3.64917	7.14109	73.1548	3.39892	53.7439	7.79658	5.78013	10.254	36.0389		0.817671	14.4007	4.40396	93.9337	0.0870729
Set329	67.3085	31.6652	32.1292	19.9357		23.5144	21.9763	38.4968	0.977652	5.22704	7.78447	37.1822	1.49295	245.804	6.02126	0.477056	5.03823		2.76687			7.11904		0.230555	5.2887	1.40399	4.17741	16.8122	1.28637	0.0543341		69.1586		17.757	4.38053	5.9043	29.2963	2.6803		8.91785	5.51173	6.976	27.6427		1.05943	14.4007	4.92448	108.322	0.0844382
Set330		28.6497	21.7895	14.7018		21.4978	23.7044	29.282	0.942191	3.43016	4.38824	7.63173	4.74873	69.3526	8.28076	0.537117	21.1429	10.7767	8.85429			9.51294		0.343061	8.62603	1.42014	4.0084	15.0673	2.12622	0.0417842		69.1586	408.271	27.615	4.69611	5.9043	66.6309	2.70553	115.109	7.65687	5.78013	10.8707	8.21714		1.77948	14.4007	4.40396	38.5825	0.0844279
Set331	38.5003	28.6497	21.7895	30.1332		22.9963	22.6611	34.0896	0.942191	5.22704	7.59344	15.897	4.42534	182.853	5.30405	0.398109	5.03823		11.6778			10.7171		0.208484	3.21069	1.15737	4.0084	16.0376	2.311	0.0417842	211.245	71.9155		23.3304	3.28053	6.9524	25.652	2.6803	268.201	7.79658	6.2988	11.3894	8.21714		1.71384	62.6281	10.5539	44.7485	0.0733301
Set332	41.5916	75.1832	24.2137	14.7018		32.5106	20.7764	33.841	0.980235	4.7652	9.21747	40.0662	1.50086	69.3526	11.0779	0.724461	16.7948		2.76687		46.7608	9.46655		0.208484	5.83287	1.15737	4.17741	23.8984	2.28896	0.0417842	147.759	69.1586		24.5768	3.64917	7.14109	73.1548	3.55941		11.8283	5.79144	10.8707	28.3715		2.02031	21.8759	2.88527	31.0842	0.0840325
Set333		25.0538	21.7895	14.7018		24.3853	26.246	46.0037	0.980235	3.43016	7.59344	16.9885	1.50086	119.883	7.78936	0.923336	10.1951		2.76687	279.021	84.6622	7.78599	36.1001	0.208484	5.83287	0.748717	4.0084	23.8984	1.26566	0.0251246	147.759	69.1586		17.702	3.89137	6.9524	56.8627	5.15502	115.109	8.8037	5.51173	8.43289	27.6427		1.32948	14.4007	4.52221	26.2761	0.0844382
Set334	35.174	20.3646	21.7895	14.7018		23.5144	21.9763	25.4157	0.977652	3.43016	8.07451	17.2964	1.17614	182.853	8.36604	0.477056	14.2625		10.7588		266.343	7.11904	36.1001	0.208484	3.21069	0.748717	5.3891	16.8122	2.54951	0.0251246	147.759	69.1586		21.0022	4.38053	7.14109	29.2963	2.70553	240.972	7.79658	5.78013	10.0723	8.21714		0.408836	19.9756	2.88527	26.2761	0.0844382
Set335	29.3093	20.3646	30.8685	29.6301		26.2264	22.8749	33.1195	0.942191	5.22704	7.46054	16.2568	1.17614	221.206	6.14125	0.50709	12.3961		10.2107			9.46655		0.213599	9.89442	1.15737	4.0084	23.8984	2.12622	0.0453523		164.731	1789.52	22.7586	3.77153	7.29413	26.7772	3.39892	115.109	8.57751	5.79144	7.44762	31.7851		2.41205	14.4007	8.58012	26.2761	0.0844279
Set336	37.8389	36.7565	31.5962	31.2074		26.2092	23.7044	29.282	1.158	3.43016	8.04619	12.3101	1.19983	178.796	10.9182	0.398109	18.6882		13.0007		266.343	7.11904	39.3233	0.230555	5.83287	0.748717	6.05945	27.3477	1.85087	0.0251246	147.759	212.423	1789.52	29.6678	3.28053	10.3488	29.2963	2.6803	188.202	8.9603	5.78013	6.976	26.1098		1.80375	68.3469	9.21028	88.2577	0.0733301
Set337	57.7998	6.43539	41.8543	34.968		23.165	21.9763	49.7816	1.02615	5.22704	6.94002	12.3101	1.19983	119.883	6.14125	0.74285	10.1951		2.76687	279.021	79.0718	9.23925		0.343061	8.96992	0.748717	4.66134	41.0638	1.26566	0.0251246	147.759	220.36		24.5768	3.64917	6.9524	31.0441	4.23061	282.847	7.66008	6.3335	7.47142	8.21714		0.408836	14.4007	2.88527	44.7485	0.0878502
Set338	251.958	33.4449	31.5962	14.7018		11.973	20.7764	29.282	0.977652	5.94591	7.59344	29.2052	1.50086	69.3526	7.21268	0.756352	5.03823		11.6778	279.021	46.7608	7.11904	36.1001	0.294582	3.21069	0.748717	4.17741	41.0638	2.28896	0.0351795		70.0343		24.2295	3.99359	10.7939	66.6309	5.15502	53.7439	8.8037	5.79144	8.43289	8.21714		0.408836	35.3216	2.88527	58.4128	0.0895017
Set339		36.2953	31.5962	14.7018		23.5144	21.9763	33.841	1.32988	3.43016	8.07451	16.2568	5.60193	183.913	6.14125	0.616071	21.584		7.22234		266.343	9.46655	36.1001	0.213599	5.83287	1.15737	4.98034	15.0673	1.83219	0.0599147		69.1586	1190.86	28.0829	5.35013	6.9524	58.5222	2.6803	53.7439	8.8037	10.4987	10.0723	6.53812		0.657648	19.9756	4.76429	88.2577	0.0844382
Set340		6.43539	31.5962	30.1919		26.2264	23.7044	32.3979	1.07547	3.43016	7.49444	16.9885	1.73818	119.353	7.71052	0.398109	14.1954		7.22234	279.021		7.78599	37.8822	0.208484	8.96992	0.748717	2.4026	23.8984	1.28637	0.0402038		69.1586		17.757	3.64917	5.9043	49.7672	4.2666	115.109	9.44459	6.16914	7.47142	8.21714		0.408836	19.9756	2.88527	46.0807	0.0733301
Set341	48.2912	26.4087	47.6799	30.2121		26.7417	21.9763	31.9261	0.977652	3.43016	7.49444	17.9295		182.853	10.4495	0.537117	5.03823		2.76687		46.7608	7.78599		0.213599	7.64145	1.15737	4.66134	16.0376	1.26566	0.0351795	147.759	71.9155	1789.52	17.757	3.77153	7.32979	52.1977	2.68945	181.018	7.95833	5.78013	7.45952	6.53812		0.817671	62.6281	3.32539	26.2761	0.0878502
Set342		28.7192	45.2074	18.2062		22.9963	21.9763	29.282	0.942191	4.78571	7.42665	16.2568	1.73818	173.678	8.60957	0.616071	18.6882		12.7515			9.46655		0.213599	8.81237	1.15737	2.4026	16.0376	1.26566	0.0402038	211.245	212.423		17.8968	3.70794	2.01107	56.8627	5.73862	231.932	8.8037	5.79144	9.02068	8.21714		0.408836	63.2772	2.88527	26.2761	0.0870369
Set343	251.958	6.43539	31.3097	14.7018		24.5217	20.7764	29.282	0.863257	3.72627	7.46054	7.63173	1.23708	182.853	6.14125	1.20194	21.584	10.7767	4.17057		79.0718	11.8166	36.1001	0.343061	8.81237	0.748717	4.0084	32.291	2.36562	0.045656	147.759	78.1269	1789.52	26.395	3.64917	7.29413	29.2963	5.12134	176.809	8.9603	5.63981	7.47142	36.0389		2.06332	40.4402	2.88527	46.0807	0.0844382
Set344	275.957	31.6652	48.1469	31.0361		24.2355	21.9505	29.282	0.977652	3.43016	8.24105	18.336	1.23708	55.853	7.21268	0.616071	14.1954		9.43942		84.6622	7.78599	37.8822	0.25409	3.21069	1.15737	2.4026	34.0688	1.28637	0.0351795	147.759	69.1586		27.5875	3.77153	2.01107	30.6617	4.23061	53.7439	9.37473	5.78013	6.976	26.1098		0.408836	14.4007	5.00636		0.0844382
Set345	29.3093	28.6497	42.1113	14.7018		22.9963	21.9763	34.0896	0.784323	4.78571	7.42665	12.3101	1.19983	183.913	6.14125	0.537117	10.1951		4.17057			7.11904	36.1001	0.260688	5.2887	1.15737	4.48387	15.0673	2.54951	0.0351795		164.731	1789.52	23.3304	4.58302	8.16582	98.9562	5.18658	231.932	7.95833	5.51173	10.0723	36.8886		2.35915	43.1557	5.69468	88.2577	0.0733301
Set346		6.43539	31.3097	19.9357		30.7339	22.6611	29.282	0.850156	2.76867	7.49444	7.63173	1.19983	69.3526	7.21268	0.756352	8.99574		8.09591			7.78599	36.1001	0.230555	3.21069	0.92433	2.4026	15.0673	2.46969	0.0565693		71.9155		27.6849	3.64917	7.32979	29.2963	2.6803	53.7439	7.79658	5.78629	10.0723	6.53812		0.408836	19.9756	2.88527	116.483	0.0639706
Set347	48.2912	20.3646	47.6499	18.2062		29.248	23.9896	34.0896	0.863257	5.38904	7.59344	16.2568	2.1769	183.913	7.21268	0.537117	10.1951		13.0007			7.11904	36.1001	0.213599	5.83287	1.05622	4.66134	23.8984	2.42025	0.0351795		250.664	408.271	17.757	3.84608	9.66449	26.7772	5.08892	268.201	7.79658	6.3335	8.43289	6.53812		0.657648	62.6281	5.5812	58.0988	0.0844382
Set348	45.2487	20.3646	42.1696	30.2121		23.5144	22.8749	38.4968	0.784323	4.70088	7.59344	17.9295	1.49295	183.913	10.4495	0.537117	10.1951	10.7767	7.83388			7.11904		0.213599	8.62603	0.748717	5.61221	15.0673	2.23818	0.0417842	211.245	71.9155		29.6678	3.64917	7.14109	73.1548	2.6803	233.102	7.95833	5.63981	8.43289	6.53812		3.02305	19.9756	2.88527	26.2761	0.0895017
Set349	41.5916		21.7895	36.5826		26.5098	22.8327	35.2762	0.977652	6.30434	7.59344	16.2568	1.17614	69.3526	6.14125	0.537117	5.03823		9.43942		79.0718	7.11904		0.343061	3.21069	1.18812	4.48387	49.0132	1.26566	0.0417842	221.347	70.0343		17.8968	2.05776	7.14109	29.2963	5.55785	53.7439	7.72673	6.54667	6.976	8.21714		0.657648	40.4402	4.53049	26.2761	0.0858704
Set350	41.5916	38.6049	59.4655	31.2074		26.3399	21.9763	33.1195	0.927279	3.43016	7.46054	16.729	1.17614	182.853	7.21268	0.46671	16.7948	10.7767	12.9821			9.28374	36.1001	0.294582	8.68369	1.59568	4.17741	48.3215	1.28637	0.0302683	147.759		408.271	22.7586	3.99359	2.01107	29.2963	2.6803	226.99	7.72673	5.80275	6.976	31.576		0.408836	19.9756	3.32539		0.0870729
Set351	38.3828	58.6523	28.1715	14.7018		28.2743	20.7764	16.2027	1.02615	3.43016	5.89184	12.3101	1.19983	178.796	7.71052	0.46671	14.1954	10.7767	7.22234	279.021	46.7608	7.78599	36.1001	0.208484	8.91897	0.748717	4.66134	15.0673	2.311	0.0302683		70.0343	408.271	22.7586	3.84608	2.01107	80.9243	2.6803	115.109	8.8037	5.78013	9.02068	40.8264		0.657648	71.472	4.52221	58.4128	0.0870729
Set352	251.958	28.6497	21.7895	14.7018		23.9359	20.7764	33.1195	1.07547	4.79185	7.59344	7.63173	1.19983	173.678	6.72864	0.398109	5.03823	10.7767	2.76687		266.343	7.78599	36.1001	0.208484	3.21069	1.59568	4.17741	16.0376	2.70302	0.0351795		171.69	408.271	21.0022	3.84608	2.01107	26.7772	3.75541	98.0799	7.95833	5.80275	10.8707	6.53812		0.408836	62.6281	2.88527	31.0842	0.0733301
Set353	38.5003	20.3646	24.2137	18.2062		24.507	20.7764	29.282	0.971162	3.43016	7.39543	16.2568	1.49295	183.383	14.1719	1.01092	14.1954		7.14862	279.021	266.343	7.78599		0.208484	3.21069	1.40399	4.0084	24.0335	2.55043	0.0302683	147.759	71.9155		17.702	3.64917	2.01107	29.2963	2.6803	53.7439	7.87746	5.78013	10.3087	8.21714		0.408836	19.9756	3.32539	93.9337	0.0733301
Set354	35.174	20.3646	21.7895	18.2062		26.3399	21.9763	30.5318	0.784323	4.78571	7.41104	16.2568	5.56411	69.3526	8.60957	0.923336	14.1954	10.7767	10.7588	279.021		7.78599	37.8822	0.374761	8.91495	0.92433	4.0084	32.291	1.26566	0.0351795		70.91	408.271	17.702	3.81162	7.14109	73.1548	3.75541		11.0926	5.80275	10.8707	27.6427		0.657648	35.3216	5.00636	38.5825	0.0870729
Set355	46.3685	36.2953	31.3097	18.2062		23.2586	21.9505	38.4968	1.18961	3.72627	7.41104	16.2568	1.23708	69.3526	8.36604	0.395367	8.99574	10.7767	7.22234	279.021	79.0718	7.78599		0.208484	6.42234	1.09819	4.17741	23.8984	1.26566	0.0251246	221.347	69.1586		22.7586	4.33921	6.9524	63.2736	2.6803	115.109	8.08753	5.80275	8.58981	31.576		0.408836	21.8759	2.88527	26.2761	0.0840325
Set356	38.5003	6.43539	21.7895	14.7018		26.2264	23.7044	31.2195	0.942191	4.78571	10.4651	16.729	1.49295	69.3526	7.21268	0.398109	5.03823		4.17057			7.11904	36.1001	0.208484	7.20538	1.18812	6.82496	31.4019	2.54361	0.0507678		69.1586		17.757	4.4242	2.01107	31.0441	2.68945	176.809	7.79658	4.72465	10.0723	22.0189		0.408836	63.2772	2.88527	93.9337	0.0844382
Set357	41.5916	26.9198	48.1469	30.2121		23.5144	21.9763	37.0138	0.784323	5.22704	7.59344	7.63173	1.49295	69.3526	6.14125	0.537117	5.03823		9.81631	279.021	46.7608	9.46655		0.213599	3.21069	1.40399	4.66134	45.0385	1.83219	0.0302683		70.0343		29.2034	4.41164	2.01107	30.6617	2.6803	231.932	7.44635	5.78013	10.8707	8.21714		1.71384	77.5043	4.40396	83.0284	0.0733301
Set358	251.958	20.3646	48.1469	18.2062		23.2597	22.8327	46.0037	0.977652	6.30434	8.98767	16.729	5.58206	173.678	6.14125	0.756352	8.99574	10.7767	16.2508			9.23925	36.1001	0.208484	3.21069	0.748717	10.0889	24.0335	1.26566	0.0385853		69.1586	408.271	29.2034	3.99359	7.32979	30.6617	2.70553	186.621	7.95833	4.72465	10.0723	28.3715		0.817671	53.5555	3.99482	38.5825	0.0870369
Set359	251.958	20.3646	47.6799	14.7018		29.9373	22.8327	28.024	0.850156	3.43016	8.24105	7.63173	1.17614	173.678	8.36604	0.398109	5.03823		2.76687		46.7608	7.11904		0.208484	3.21069	1.15737	5.3891	16.0376	1.26566	0.0565693		78.1269	408.271	22.7586	3.70794	7.32979	30.6617	3.39892	231.932	7.4253	5.79144	10.8707	6.53812		0.408836	14.4007	3.32539	58.4128	0.0733301
Set360		38.6049	41.8543	18.2062		24.5217	22.8327	31.2159	1.158	3.72627	7.49444	16.9885	1.17614	69.3526	6.70656	0.477056	5.03823		9.43511	300.113	46.7608	7.78599		0.208484	7.32029	0.748717	4.0084	15.0673	2.42025	0.0302683	147.759	70.91	408.271	23.3304	5.01382	9.41665	88.0733	4.23061	94.9183	10.0265	5.78013	8.58981	6.53812		0.408836	17.732	3.32539	46.0807	0.0844382
Set361	45.2487	37.9099	48.1469	30.1919		26.3399	22.8327	34.0896	0.977652	3.43016	7.39543	12.3101	1.19983	178.796	14.5645	0.398109	5.03823		9.81631	279.021		7.11904	37.8822	0.208484	3.21069	1.15737	4.66134	16.8122	2.22341	0.0402038	147.759	220.36		28.7523	4.27732	5.9043	63.2736	2.68945	183.807	7.65687	5.63981	7.47142	8.21714		0.817671	17.732	2.88527	48.4976	0.0870729
Set362	251.958	28.7192	65.943	14.7018		24.5801	20.7764	34.0896	0.980235	3.43016	7.73497	16.6425	2.1769	182.853	8.0922	0.910391	18.1517	10.7767	2.76687		46.7608	12.1528	36.1001	0.208484	5.2887	1.59568	6.82496	49.0132	2.54951	0.0402038		69.1586	1190.86	28.506	4.58302	9.41665	29.2963	5.53851	231.932	8.91785	5.80275	10.7653	6.53812		0.408836	14.4007	3.32539	108.322	0.0878502
Set363	46.3685	6.43539	48.1469	30.2121		26.2264	22.6611	34.0896	0.863257	3.43016	7.59344	16.0853	4.74873	69.3526	8.36604	0.398109	5.03823		2.76687		79.0718	7.78599	36.1001	0.213599	5.83287	0.92433	2.4026	16.0376	1.26566	0.0417842	211.245	71.9155	408.271	29.6514	3.77153	5.9043	25.652	2.6803	268.201	7.75641	5.78013	8.43289	26.1098		0.408836	19.9756	2.88527	31.0842	0.0733301
Set364	35.174	6.43539	53.6595	27.2075		23.9359	23.7044	32.6782	1.07547	3.72627	7.42665	7.63173	1.19983	173.678	7.71052	0.756352	14.1954		2.76687		79.0718	9.46655	37.8822	0.294582	5.9569	0.92433	2.4026	16.8122	1.26566	0.0302683		171.69	1789.52	26.395	3.64917	7.14109	29.2963	3.55941	188.202	7.79658	5.63981	6.976	31.7851		2.76811	14.4007	4.40396	58.4128	0.0844382
Set365	171.633	6.43539	48.5531	14.7018		26.3399	21.9763	28.024	1.01063	3.43016	8.38573	22.5511	3.69928	183.913	6.72864	0.616071	14.1954	10.7767	2.76687	279.021		10.2606	36.1001	0.343061	5.2887	1.15737	2.4026	18.3379	2.28896	0.045656	147.759	69.1586		23.0654	3.99359	2.01107	101.794	4.2666	115.109	11.0926	5.78013	10.0723	8.21714		1.32948	14.4007	4.52221	124.257	0.0844382
Set366	41.5916	20.3646	31.3097	18.2062		26.2264	21.9763	29.282	1.02615	3.43016	7.73497	12.3101	1.17614	178.796	5.1065	0.46671	12.4786		2.76687			11.1001	37.8822	0.294582	5.83287	1.18812	4.0084	45.0385	2.54361	0.0402038	147.759	212.423		17.702	3.70794	2.01107	29.2963	3.39892	53.7439	8.57751	6.10755	7.47142	31.576		0.657648	14.4007	2.88527	38.5825	0.0733301
Set367	251.958	26.4087	41.8543	30.2121		25.2309	18.7967	29.282	0.980235	3.72627	7.49444	16.2568	1.23708	183.383	8.28076	0.398109	10.1951		8.85429			11.8166	37.8822	0.294582	3.21069	0.92433	2.4026	16.7657	1.00072	0.0433572		69.1586		23.3304	3.70794	7.14109	25.652	3.81476	115.109	7.79658	5.80275	10.3087	26.1098		0.657648	40.4402	3.32539	48.4976	0.0844382
Set368	275.957		48.9698	41.9508		29.248	22.6611	34.0896	0.977652	3.43016	8.2461	16.9885	4.74873	245.804	6.14125	0.923336	21.584		4.17057			7.11904		0.208484	9.44137	1.18812	5.3891	16.8122	1.26566	0.0302683		69.1586		29.2034	3.64917	6.9524	56.8627	4.23061	181.018	12.0446	5.78013	8.43289	8.21714		2.35915	14.4007	2.88527	38.5825	0.0895017
Set369	35.174	20.3646	65.1262	14.7018		26.3399	22.6611	33.1195	1.00426	5.94591	8.07451	16.6425	1.17614	69.3526	6.49766	0.46671	14.2625		12.1307	279.021	266.343	13.4072		0.208484	5.83287	0.953044	4.0084	16.8122	1.26566	0.0417842	221.347	69.1586		24.5768	3.64917	7.14109	48.1872	4.23061	53.7439	7.4253	6.3335	10.254	8.21714		0.408836	14.4007	4.40396	26.2761	0.0733301
Set370	35.174	25.0538	31.3097	18.2062		26.2264	20.7764	33.1195	0.942191	4.7652	5.21587	16.6425	1.17614	119.353	3.99419	0.398109	8.99574	10.7767	4.17057	359.238	46.7608	7.90013	36.1001	0.213599	5.83287	0.953044	2.4026	16.8122	2.1158	0.0251246		69.1586		26.395	3.99359	2.01107	46.5125	5.73862	53.7439	7.95833	5.51173	8.58981	40.687		0.408836	21.8759	2.88527	83.0284	0.0733301
Set371	41.5916	25.8976	22.4613	30.2121		26.3399	26.0828	70.679	0.863257	3.43016	8.60937	7.63173	1.50086	69.3526	12.3956	0.576594	22.2225		2.76687		46.7608	7.11904	37.8822	0.294582	8.96992	1.69735	4.17741	15.0673	1.26566	0.0435683	147.759	212.423		30.5607	3.81162	2.01107	30.6617	5.73862	53.7439	8.8037	6.3335	7.44762	37.4014		0.657648	19.9756	4.40396	26.2761	0.0733301
Set372	35.174		24.2137	14.7018		27.7372	20.7764	33.2478	0.982369	3.43016	7.59344	18.336	4.74873	69.3526	6.14125	0.537117	10.1951		8.09591		394.928	9.46655		0.476942	9.76166	2.55246	2.4026	45.0385	2.28896	0.0351795		71.9155	408.271	21.0022	3.28053	5.9043	68.8573	3.77702	231.932	7.65687	5.80275	7.45952	38.614		0.408836	40.4402	3.32539	38.5825	0.0733301
Set373		6.43539	45.2074	24.1697		26.2264	21.9763	32.2555	0.980235	3.72627	7.42665	16.2568	1.17614	69.3526	6.72864	0.398109	14.2625		2.76687	279.021	46.7608	7.11904	36.1001	0.230555	8.68369	1.31343	2.4026	29.764	1.26566	0.0351795		70.91		22.7586	3.81162	2.01107	26.7772	4.23061	222.838	7.66008	5.79144	8.58981	26.1098		0.408836	40.4402	2.88527	46.0807	0.0851543
Set374	35.174	6.43539	21.7895	18.2062		24.2355	22.8327	44.9554	0.977652	3.72627	7.46054	7.63173	1.50086	173.678	6.02126	0.537117	14.1954		2.76687	300.113		7.78599		0.294582	6.42234	1.18812	4.48387	32.291	1.28637	0.0251246		164.731	1789.52	17.8968	3.70794	6.9524	48.1872	3.55941	115.109	7.66008	5.80275	10.0723	27.6427		2.02031	19.9756	6.80712	130.436	0.0858704
Set375	35.174	20.3646	30.8685	18.2062		23.9359	20.7764	29.282	0.980235	3.43016	7.42665	12.3101	1.19983	178.796	8.60957	0.756352	5.03823		4.17057		84.6622	7.11904	39.3233	0.230555	5.83287	0.748717	4.99858	27.3477	1.26566	0.0417842	147.759	69.1586		17.757	3.70794	7.14109	30.6617	3.81476	53.7439	7.65687	5.78013	10.254	28.3715		0.408836	14.4007	2.88527	58.0988	0.0870369
Set376	46.3685	20.3646	48.1469	30.1919		26.2264	29.5655	34.0896	1.02615	3.43016	8.46268	12.3101	1.19983	119.353	8.36604	0.756352	10.1951		2.76687	279.021		11.8166		0.208484	8.96992	0.748717	4.66134	23.8984	2.6032	0.0351795	147.759			26.395	3.64917	5.9043	31.0441	5.42564	53.7439	7.4674	5.63981	7.47142	31.576		0.408836	62.6281	2.88527	83.0284	0.0733301
Set377	35.174	28.7192	48.5531	34.968		24.9872	20.7764	29.282	0.549093	3.72627	8.0618	7.63173	1.49295	69.3526	6.14125	0.537117	10.1951	10.7767	12.7515		394.928	9.46655		0.208484	6.42234	1.56506	2.4026	85.4702	1.26566	0.0402038		220.36	408.271	17.702	3.81162	2.01107	73.1548	2.6803	53.7439	7.65687	5.80275	7.47142	26.1098		0.817671	40.4402	4.40396	116.483	0.0844382
Set378	38.5003	28.6497	45.529	30.1919		29.248	21.9763	29.282	0.977652	3.43016	7.59344	12.3101	1.17614	178.796	8.60957	0.398109	18.2931	10.7767	10.7588	279.021	394.928	7.11904		1.19612	5.2887	1.42014	4.66134	16.0376	1.28637	0.0302683		69.1586		21.0022	3.70794	9.41665	29.2963	2.6803	278.324	7.72673	6.16914	11.3894	27.6427		0.657648	62.6281	2.88527	88.2577	0.0864537
Set379	44.6829	36.4746	48.9698	14.7018		26.3399	21.9763	29.282	0.942191	5.22704	7.49444	12.3101	1.17614	178.796	7.71052	0.756352	5.03823		9.81631	279.021	46.7608	7.78599	37.8822	0.25409	3.21069	0.748717	4.48387	16.8122	2.54775	0.0402038		69.1586	408.271	21.0022	4.09176	7.14109	88.0733	2.72223	231.932	7.79658	5.78013	6.976	26.1098		1.32948	19.9756	4.52221	108.322	0.0870369
Set380	67.3085	28.6497	32.1292	36.7476		22.9963	22.8327	32.6782	0.980235	4.79185	7.49444	23.7059	1.17614	119.883	6.14125	0.46671	5.03823	10.7767	2.76687	300.113	394.928	11.1001	39.3233	0.213599	5.2887	0.748717	4.48387	16.8122	1.26566	0.0351795		165.356	408.271	23.0654	4.27732	7.29413	25.652	2.68945	61.2994	7.95833	5.63981	6.976	40.5495		0.408836	21.8759	5.46381	52.2467	0.0844382
Set381	37.8389	6.43539	47.6499	31.2074		26.2264	20.7764	33.841	0.863257	3.72627	7.41104	7.63173	1.17614	121.515	6.14125	0.923336	5.03823	10.7767	2.76687	279.021	79.0718	7.78599	36.1001	0.213599	3.21069	0.92433	4.0084	16.0376	1.26566	0.0351795	147.759	69.1586	408.271	29.2034	3.84608	7.29413	31.0441	2.72223	115.109	7.95833	5.78013	6.976	31.576		0.408836	19.9756	5.69468	26.2761	0.0733301
Set382	41.5916	23.1878	21.7895	14.7018		25.2309	20.7764	28.024	1.18961	3.72627	7.42665	26.8945	4.74873	173.678	5.1065	0.686211	5.03823	10.7767	11.6778	279.021		9.55932	36.1001	0.294582	3.21069	0.748717	4.48387	24.0335	1.28637	0.0402038	211.245	70.91	408.271	23.3304	4.51622	7.17526	48.1872	5.73862	231.932	7.95833	5.80275	10.3087	6.53812		1.05943	14.4007	4.52221	75.305	0.0844279
Set383	44.6829	20.3646	49.5943	30.1919		23.9359	22.8327	37.0138	0.942191	3.43016	8.46268	16.2568	1.17614	69.3526	7.71052	0.537117	5.03823		8.09591			9.47711	36.1001	0.208484	3.21069	0.748717	4.48387	16.0376	2.54361	0.0302683	211.245	69.1586	1789.52	23.3304	5.01382	8.16582	25.652	5.73862	53.7439	7.65687	5.78013	10.4431	31.576		1.57553	21.8759	7.19645	88.2577	0.0882693
Set384	35.174	20.3646	45.2074	14.7018		23.5144	25.1042	28.024	0.942191	6.06092	8.07451	15.897	1.17614	178.796	6.14125	0.537117	10.1951		2.76687	279.021	79.0718	7.11904		0.208484	3.21069	1.15737	4.17741	16.0376	1.28637	0.0351795		69.1586	1789.52	17.8968	4.41164	2.01107	30.6617	4.96656	231.932	9.44459	6.3335	8.58981	31.576		0.817671	17.732	4.40396	88.2577	0.0737956
Set385	35.174	6.43539	62.5719	14.7018		26.2264	21.9763	29.282	0.980235	5.22704	9.99179	16.2568	1.17614	119.883	7.22734	1.01092	18.6115		2.76687	300.113		9.46655	37.8822	0.208484	9.40025	1.18812	12.899	34.0688	1.26566	0.0351795		220.36		27.615	4.58302	2.01107	26.7772	4.96656	231.932	7.65687	5.78013	10.0723	6.53812		0.408836	14.4007	2.88527	38.5825	0.0804162
Set386	35.174	6.43539	21.7895	37.5903		30.123	21.9505	32.2555	0.863257	5.22704	8.07451	12.3101	1.19983	178.796	8.28076	0.477056	18.6882		8.85429		79.0718	10.7319		0.294582	5.9569	0.92433	4.0084	23.8984	2.12622	0.0402038		70.0343	1789.52	28.2983	3.64917	10.3488	29.2963	2.6803	115.109	7.79658	5.78013	6.976	31.576		0.408836	40.4402	2.88527	88.2577	0.0844382
Set387	29.3093		48.5531	29.0735		28.7905	20.7764	29.282	0.977652	5.09595	10.4651	16.9885	1.23708	69.3526	3.40529	0.46671	19.7771		11.6778		266.343	9.46655		0.25409	8.91495	0.748717	4.17741	77.0088	1.26566	0.0453523		69.1586		22.7586	3.81162	2.01107	76.5999	4.33844	282.847	7.77747	5.78013	9.61248	28.3715		0.657648	40.4402	5.46381	48.4976	0.0844382
Set388	67.3085	28.7192	48.5531	34.6749		22.9963	20.7764	29.282	0.980235	4.43494	7.49444	29.2052	6.41538	221.206	7.21268	0.616071	10.1951		2.76687		84.6622	10.8238	36.1001	0.230555	8.81237	1.15737	4.17741	34.0688	1.26566	0.0251246		70.91		24.5768	3.70794	11.1188	25.652	2.70553	231.932	7.65687	5.80275	13.0974	8.21714		1.57553	40.4402	18.5442	26.2761	0.0844279
Set389	45.2487	6.43539	46.9089	18.2062		21.4978	22.6611	48.3083	0.863257	3.43016	8.04619	12.3101	1.19983	69.3526	6.14125	0.46671	17.8797		9.81631	300.113		7.11904		0.208484	5.83287	1.18812	4.48387	16.0376	1.83219	0.0402038		69.1586	1789.52	21.0022	2.05776	7.14109	29.2963	3.91301		7.79658	5.78013	8.43289	27.6427		0.408836	43.1557	3.32539	46.0807	0.0844279
Set390	43.98	36.2953	39.2562	27.1919		26.2264	25.1042	29.282	0.982369	5.22704	9.35015	16.6425	1.50086	69.3526	7.33111	1.07923	5.03823		8.09591		46.7608	7.78599	37.8822	0.208484	5.83287	1.42014	4.17741	16.8122	2.42025	0.0302683		69.1586	1190.86	23.0654	3.64917	2.01107	25.652	2.72223	189.435	7.65687	5.78013	6.99172	27.6427		1.93322	62.6281	4.52221	93.9337	0.0733301
Set391	35.174	6.43539	46.9089	30.739		24.5217	22.6611	38.4968	0.977652	3.86287	6.45339	25.2613	2.1769	183.913	3.40529	0.756352	10.1951	10.7767	11.6778		46.7608	7.11904	36.1001	0.208484	6.42234	1.58113	2.4026	16.8122	1.26566	0.0453523	221.347	269.925	408.271	17.8968	3.70794	5.9043	31.0441	4.23061	115.109	11.0926	5.63981	7.47142	27.6427		1.71384	40.4402	7.95271	26.2761	0.0844382
Set392		28.6497	31.5962	14.7018		23.9359	22.6611	64.9608	0.971162	4.70088	8.30485	16.6425	4.74873	253.726	8.36604	0.46671	14.1954		2.76687		79.0718	7.11904	36.1001	0.208484	9.44137	0.748717	5.41668	49.0132	2.42025	0.0251246		71.9155		23.3304	3.81162	6.9524	31.0441	5.18658		7.95833	5.78013	8.43289	8.21714		0.657648	14.4007	4.92448	116.483	0.0733301
Set393	41.5916	20.3646	30.8685	14.7018		23.7752	21.9763	46.0037	1.158	2.76867	4.32623	16.2568	1.17614	69.3526	6.72864	0.398109	18.6347		11.6778	279.021		7.11904	36.1001	0.213599	8.68369	0.748717	4.48387	16.8122	2.28896	0.0351795		164.731	408.271	31.0372	4.33921	7.32979	25.652	2.68945		7.87746	6.3335	6.976	6.53812		1.57553	53.5555	5.46381	46.0807	0.0844382
Set394	251.958	20.3646	48.5531	19.9357		23.7752	21.9763	26.974	0.982369	3.72627	7.39543	12.3101	1.19983	178.796	7.71052	0.398109	14.1954		2.76687		266.343	9.01195	36.1001	0.230555	3.21069	0.92433	2.4026	49.0132	2.54951	0.0402038	147.759	71.9155		21.0022	3.70794	5.9043	56.8627	2.72223	115.109	10.7549	5.78629	7.47142	31.576		0.657648	62.6281	4.92448	159.72	0.0895017
Set395	35.174	89.711	52.3698	19.9357		30.7339	21.9763	34.0896	1.02615	3.43016	7.59344	12.3101	1.19983	178.796	7.33111	0.50709	10.1951		10.7588			11.1001		0.213599	5.9569	0.748717	4.17741	29.764	2.54361	0.0351795		171.69	1789.52	17.702	3.81162	8.16582	31.0441	2.6803	53.7439	11.4933	5.80275	10.7653	28.3715		0.657648	19.9756	2.88527	88.2577	0.0857375
Set396	44.6829	6.43539	31.5962	14.7018		23.5144	18.7967	32.6782	0.977652	4.70088	7.59344	16.2568	6.58232	173.678	7.33111	0.398109	12.3961		13.0007			7.78599		0.208484	5.83287	0.748717	4.17741	43.9437	2.42025	0.0251246	221.347	70.0343		17.757	1.92531	2.01107	29.2963	5.55785	115.109	8.57751	5.79144	10.3087	26.1098		0.408836	14.4007	5.94457	31.0842	0.0844382
Set397		6.43539	41.8543	14.7018		26.2264	20.7764	29.282	0.927279	3.43016	7.59344	16.9885	1.49295	69.3526	6.72864	0.853231	10.1951		2.76687	342.514	266.343	7.11904		0.208484	3.21069	1.40399	4.0084	23.8984	2.42025	0.0351795		69.1586	408.271	23.3304	3.28053	2.01107	30.6617	2.6803	53.7439	7.95833	5.78013	7.47142	31.576		0.408836	62.6281	3.32539	38.5825	0.0733301
Set398	113.855	20.3646	21.7895	14.7018		26.3399	20.7764	32.2555	0.927279	5.38904	7.49444	16.2568	2.1769	182.853	7.21268	0.477056	18.6115		11.6778			7.78599		0.208484	8.98037	0.748717	5.4126	23.8984	1.26566	0.0417842		69.1586		22.7586	3.70794	8.16582	29.2963	3.77702	231.932	8.91785	5.79144	6.976	28.3715		0.817671	14.4007	2.88527	88.2577	0.0733301
Set399	67.3085	6.43539	25.938	32.4913		26.2264	21.9763	44.9554	1.05969	1.4214	7.83637	16.2568	4.74873	183.913	6.49766	0.756352	10.1951	10.7767	12.7504			7.11904	36.1001	0.208484	5.83287	1.15737	4.17741	44.1707	1.26566	0.0302683		220.36	408.271	28.0829	3.64917	7.32979	29.2963	2.6803	231.932	7.79658	5.78013	7.47142	8.21714		1.32948	44.1059	9.21028		0.0733301
Set400	35.174	75.1832	21.7895	30.2121		23.9359	22.8327	33.1195	0.784323	3.43016	8.98767	16.2568	5.60193	183.383	6.14125	0.395367	14.1954		2.76687	359.238	79.0718	10.3341		0.294582	5.2887	1.15737	4.0084	16.0376	1.28637	0.0251246		317.144	408.271	25.1286	3.70794	2.01107	29.2963	4.23061	53.7439	7.79658	5.63981	10.7653	6.53812		0.657648	14.4007	5.46381	38.5825	0.0733301
Set401	35.174	26.9198	42.1696	31.2074		28.7905	22.8327	32.3979	0.980235	4.08588	7.59344	16.729	1.49295	121.515	6.14125	0.616071	8.99574		2.76687		79.0718	9.46655		0.208484	5.83287	0.748717	2.4026	64.4429	1.26566	0.0351795	221.347	70.0343	1190.86	17.702	3.99359	5.9043	75.3275	3.39892	231.932	11.7677	5.78013	6.976	36.0389		1.57553	40.4402	4.40396	26.2761	0.0733301
Set402	48.2912	26.9198	47.6499	18.2062		26.5098	22.6611	33.2478	0.942191	3.72627	7.42665	15.897	1.23708	69.3526	7.71052	0.46671	16.6789		8.09591		266.343	7.11904	36.1001	0.213599	3.21069	1.15737	4.48387	16.0376	1.83219	0.0302683		70.0343	1190.86	27.615	2.05776	7.32979	26.7772	2.6803	80.9232	7.79658	6.10755	9.02068	6.53812		0.408836	14.4007	3.32539	75.305	0.0733301
Set403		20.3646	21.7895	18.2062		22.9963	20.7764	33.1195	0.977652	4.7652	7.49444	16.9885	5.60193	221.206	7.21268	0.580249	14.2625		2.76687			6.32316		0.208484	8.91495	0.748717	4.33288	16.0376	1.26566	0.0402038		70.91	1190.86	21.0022	3.81162	11.2183	30.6617	3.55941	169.812	8.57751	5.78013	9.61248	26.1098		0.657648	40.4402	2.88527	26.2761	0.0844382
Set404	41.5916	6.43539	30.8685	36.7325		26.2264	26.0828	32.2555	0.977652	3.43016	4.38824	7.63173	1.17614		8.28076	0.616071	10.1951		10.2107			7.11904		0.208484	9.44137	1.40399	4.48387	46.2461	1.26566	0.0351795		69.1586		17.8968	3.70794	2.01107	29.2963	2.68945	115.109	7.87746	5.51173	7.47142	41.0581		0.817671	21.8759	2.88527	31.0842	0.0867118
Set405	41.5916	20.3646	25.938	19.9357		25.2309	21.9763	33.841	0.942191	4.78571	7.39543	16.2568	1.23708	263.989	7.71052	0.46671	5.03823		2.76687			7.11904	39.3233	0.374761	3.21069	0.92433	2.4026	43.9437	2.0633	0.045656		69.1586		28.2983	3.99359	2.01107	29.2963	3.55941	53.7439	7.77747	6.10755	10.0723	8.21714		2.06332	75.5818	8.64443	83.0284	0.0737956
Set406	37.8389		47.6499	31.2074		29.248	21.9763	39.8408	0.863257	3.43016	7.46054	24.1388	1.49295	69.3526	7.41867	0.46671	14.2625		2.76687	325.79		7.11904		0.230555	5.83287	1.15737	5.61221	64.4429	2.22341	0.0402038		69.1586		27.6849	3.64917	2.01107	48.1872	3.39892		8.57751	5.80275	7.47142	37.6258		0.408836	66.3359	4.52221	38.5825	0.0733301
Set407		26.9198	25.938	18.2062		23.5144	18.7967	32.2555	0.977652	3.72627	7.51004	12.3101	1.19983	119.883	8.28076	0.398109	14.2625		11.6778	300.113	84.6622	7.11904		0.505343	3.21069	0.92433	4.98034	16.0376	2.42025	0.0351795		69.1586		23.3304	3.64917	7.32979	29.2963	3.77702	53.7439	7.79658	5.63981	17.0489	27.6427		0.408836	40.4402	4.76429	83.0284	0.0870729
Set408	35.174	25.8976	21.7895	14.7018		22.9963	25.1042	45.4193	0.977652	2.76867	8.07451	7.63173	1.19983	173.678	6.72864	0.756352	12.3961		2.76687		46.7608	10.7319	36.1001	0.807022	3.21069	0.748717	2.4026	16.0376	2.36562	0.0467243		69.1586		22.7586	4.27732	2.01107	30.6617	3.55941	100.547	8.91785	5.63981	9.61248	27.6427		1.57553	14.4007	2.88527	26.2761	0.0733301
Set409	45.2487	33.4449	31.5962	18.2062		26.3399	18.7967	34.0896	1.158	4.70088	8.98767	17.9295	5.58206	183.913	7.71052	0.74285	5.03823	10.7767	10.7588			7.11904	39.3233	0.343061	5.83287	0.92433	4.0084	45.0385	2.36562	0.0453523		212.423		23.3304	4.06172	2.01107	66.6309	2.6803			5.79144	10.8707	40.5495		0.408836	19.9756	3.32539	26.2761	0.0902923
Set410	36.8207	25.0538	48.5531	14.7018		26.3399	21.9763	29.282	0.927279	2.76867	7.49444	24.1388	3.26056	182.853	7.71052	0.477056	16.7948	10.7767	11.6778			11.8166	37.8822	0.208484	5.83287	0.953044	4.48387	23.8984	1.26566	0.0402038		69.1586		22.7586	4.27732	2.01107	66.6309	2.6803	115.109	8.8037	5.78013	6.976	37.6258		0.817671	71.9201	2.88527	26.2761	0.0737956
Set411	44.6829	28.7192	30.8685	14.7018		25.2309	26.1852	46.0037	1.10047	5.22704	7.59344	16.9885	1.23708	69.3526	8.36604	0.46671	5.03823		4.17057			10.7319		0.260688	9.44137	1.15737	4.0084	18.3379	2.54951	0.0351795				25.1286	4.33921	5.9043	98.4406	2.6803	53.7439	8.57751	5.78013	9.61248	31.576		0.408836	70.6365	5.69468	48.4976	0.0733301
Set412	44.6829	6.43539	21.7895	18.2062		22.9963	20.7764	21.8579	0.927279	6.76173	7.49444	12.3101	1.17614	178.796	7.92492	0.477056	14.1954		12.7694			9.55932	37.8822	0.86356	3.21069	1.15737	2.4026	24.0335	2.32183	0.0599147		70.91		23.3304	4.87634	7.29413	66.6309	2.6803	181.018	7.95833	5.80275	9.02068	27.6427		0.657648	75.9454	2.88527	390.472	0.0804162
Set413	38.5003	28.7192	48.5531	30.2121		22.9963	26.1852	34.0896	0.927279	3.72627	8.99204	7.63173	1.17614	69.3526	6.95962	0.398109	14.1954		4.17057	279.021	79.0718	7.78599		0.208484	6.42234	1.15737	4.81939	49.0132	1.26566	0.045656	147.759	220.36	408.271	17.757	4.27732	8.16582	73.1548	4.23061	53.7439	7.77747	5.78013	5.10641	26.1098		1.91179	66.3359	5.00636	48.4976	0.0895017
Set414	114.816	28.6497	25.938	14.7018		24.2355	20.7764	48.3083	1.158	5.38904	7.46054	16.2568	1.49295	173.678	7.21268	0.756352	12.3961		2.76687			9.47711	36.1001	0.208484	3.21069	1.15737	4.0084	16.8122	1.26566	0.0302683		70.91		22.7586	3.81162	2.01107	29.2963	2.6803	115.109	7.75641	5.51173	10.0723	27.6427		0.817671	21.8759	4.52221	46.0807	0.0858704
Set415	29.3093	6.43539	21.7895	14.7018		32.5106	21.9763	22.9363	0.784323	3.72627	8.07451	16.2568		182.853	6.72864	0.395367	10.1951	10.7767	12.7694		79.0718	7.11904	36.1001	0.230555	3.21069	0.748717	4.17741	15.0673	1.26566	0.0453523		71.9155		25.1286	3.70794	6.9524	26.7772	2.72223	181.018	8.57751	5.78013	7.47142	8.21714		0.646661	14.4007	4.52221	26.2761	0.0733301
Set416	35.174	37.9099	31.5962	14.7018		26.2264	18.7967	28.024	0.942191	3.43016	7.46054	7.63173	4.63705	121.515	7.21268	0.395367	10.1951		10.2107	279.021	46.7608	7.78599	36.1001	0.343061	5.83287	0.92433	2.4026	27.3477	2.63387	0.0417842	221.347	78.1269	408.271	22.7586	4.8614	2.01107	30.6617	5.15502	53.7439	7.79658	5.78013	9.02068	27.6427		0.408836	19.9756	5.46381	58.4128	0.0733301
Set417	38.3828	6.43539	21.7895	31.2074		26.2264	20.7764	38.4968	1.05969	3.43016	7.59344	16.9885	6.06591	250.035	3.40529	0.616071	10.1951		4.33957			10.8238		0.230555	3.21069	1.15737	2.4026	49.0132	1.26566	0.0402038	147.759			17.8968	3.70794	7.14109	31.0441	2.6803	115.109	7.65687	6.3335	13.0974	31.576		0.657648	19.9756	5.69468	26.2761	0.0858704
Set418	35.174	28.7192	21.7895	18.2062		24.9872	20.7764	29.282	0.980235	4.7652	8.07451	16.2568	2.1769	178.796	7.21268	0.398109	18.2931	10.7767	10.2107	300.113	84.6622	7.78599	36.1001	0.343061	3.21069	0.92433	4.17741	45.0385	1.26566	0.0302683		69.1586	408.271	23.3304	3.70794	5.9043	31.0441	3.39892	115.109	7.72673	5.78013	9.02068	6.53812		0.408836	53.5555	5.46381	88.2577	0.0733301
Set419	46.3685	6.43539	21.7895	14.7018		25.2309	21.9763	34.0896	0.980235	2.76867	8.69694	16.2568	1.23708	69.3526	3.40529	0.46671	5.03823		9.43942	279.021	46.7608	9.46655	36.1001	0.294582	5.83287	0.748717	4.48387	16.8122	2.24424	0.0251246		212.423		21.0022	3.84608	2.01107	29.2963	3.39892	231.932	7.65687	5.80275	10.0723	6.53812		0.408836	21.8759	3.32539	31.0842	0.0844382
Set420	57.7998	6.43539	21.7895	18.2062		26.3399	22.8327	29.282	0.977652	4.08588	7.59344	15.897	1.49295	173.678	8.36604	0.395367	5.03823		10.2107			12.1198	36.1001	0.230555	3.21069	1.18812	4.98034	16.0376	2.42025	0.0351795		71.9155		22.7586	3.84608	7.32979	98.4406	3.75541	115.109	7.79658	5.80275	6.976	8.21714		0.408836	40.4402	3.32539	31.0842	0.0882693
Set421	35.174	33.2798	21.7895	18.2062		24.5801	20.5575	33.841	0.980235	4.70088	7.49444	16.729		311.264	6.95962	0.616071	23.7773	10.7767	2.76687		79.0718	10.8238	36.1001	0.213599	3.21069	0.953044	4.17741	45.0385	1.28637	0.0302683	221.347	264.565	1789.52	23.3304	3.99359	2.01107	30.6617	2.70553	53.7439	7.79658	4.72465	7.44762	31.576		1.53865	19.9756	2.88527	38.5825	0.0882693
Set422	35.174	6.43539	21.7895	37.4401		25.2309	20.7764	33.841	1.21857	6.06092	7.49444	12.3101	1.19983	69.3526	7.21268	0.756352	18.6347		7.22234	279.021	46.7608	7.11904	37.8822	0.208484	5.83287	0.863183	4.17741	16.8122	1.27601	0.0351795		69.1586		24.5768	3.70794	9.66449	73.1548	3.81476	53.7439	7.75641	5.63981	5.10641	6.53812		0.817671	14.4007	4.40396	46.0807	0.0733301
Set423	45.5257	20.3646	45.529	35.0315		11.973	21.9763	38.4968	1.02615	3.43016	7.42665	16.2568	1.23708	183.913	3.40529	1.05585	19.7384		2.76687		394.928	7.11904	37.8822	0.343061	3.21069	1.58113	2.4026	32.291	2.311	0.0351795	147.759		1190.86	26.395	4.2549	7.29413	29.2963	2.6803	183.807	11.4933	5.63981	10.0723	27.6427		0.408836	62.6281	7.95842	38.5825	0.0864537
Set424	275.957	20.3646	21.7895	18.2062		24.5801	20.7764	32.3979	0.977652	3.43016	7.42665	18.336	4.42534	69.3526	7.78936	0.616071	18.7971		2.76687			12.1198		0.294582	3.21069	0.748717	4.0084	15.0673	2.42025	0.0417842		69.1586	1789.52	17.702	3.70794	2.01107	30.6617	2.70553	231.932	7.65687	6.2988	9.61248	33.2472		1.93322	40.4402	4.52221	88.2577	0.0878502
Set425	251.958	28.6497	31.5962	31.2074		26.7417	20.7764	33.2478	1.18961	3.43016	7.39543	16.9885	1.73818	173.678	4.7114	0.686211	12.3961		12.7515			10.7319		0.208484	5.2887	0.748717	4.17741	16.8122	2.54361	0.0453523				22.7586	4.8614	2.01107	66.6309	2.70553	245.125	11.0926	5.79144	8.58981	31.576		0.408836	65.7635	4.52221	93.9337	0.151277
Set426		28.6497	21.7895	19.9357		26.3399	20.7764	33.841	1.07547	2.76867	7.42665	16.9885		69.3526	8.60957	0.616071	10.1951		2.76687	279.021	46.7608	10.8238	37.8822	0.427333	3.21069	1.59568	4.17741	16.8122	2.41969	0.0302683		220.36	408.271	17.702	3.28053	6.9524	29.2963	4.23061	249.277	7.95833	5.63981	8.58981	8.21714		0.817671	14.4007	4.40396	46.0807	0.0791169
Set427	48.2912	28.7192	41.8543	18.2062		21.4978	18.7967	48.3083	0.863257	5.49408	5.21587	7.63173	1.17614	119.353	4.7114	0.46671	14.1954		2.69315			9.51294		0.294582	5.2887	0.748717	4.0084	16.0376	1.26566	0.0351795		69.1586		26.395	3.64917	2.01107	30.6617	5.08892	115.109	7.79658	5.80275	10.7653	8.21714		0.408836	17.732	4.40396	58.0988	0.0733301
Set428	38.5003	20.3646	49.5943	18.2062		26.3399	21.9763	32.6782	1.07547	2.76867	8.46268	12.3101	1.19983	69.3526	7.21268	0.477056	18.6882		11.6778	300.113	79.0718	9.46655		0.213599	3.21069	1.15737	4.0084	16.0376	2.22341	0.0351795	147.759	69.1586		23.3304	4.03662	8.16582	66.6309	4.23061	231.932	7.72673	6.3335	6.976	40.5495		0.408836	62.6281	4.40396	88.2577	0.0733301
Set429	44.6829	28.6497	31.3097	35.4188		22.9963	23.7044	32.6782	1.158	5.49408	6.97391	12.3101	1.19983	69.3526	7.78936	0.537117	20.7572	10.7767	2.76687	300.113	46.7608	9.55932	37.8822	0.208484	5.2887	1.18812	4.17741	16.0376	1.28637	0.045656	147.759	220.36	408.271	30.5607	3.81162	2.01107	30.6617	3.81476	98.0799	11.0926	5.78013	8.43289	26.1098		0.408836	14.4007	3.32539	31.0842	0.0844279
Set430	35.174	36.4746	48.5531	14.7018		22.9963	21.9763	38.4968	0.980235	5.22704	8.07451	16.2568	9.87632	69.3526	7.71052	0.398109	5.03823	10.7767	12.1307	279.021		7.11904	36.1001	0.470466	3.21069	0.92433	4.17741	16.0376	2.54951	0.045656	221.347	212.423	1789.52	23.3304	3.77153	8.16582	29.2963	3.75541	53.7439	7.79658	5.80275	10.8707	6.53812		0.657648	53.5555	2.88527	26.2761	0.0844382
Set431	29.3093	6.43539	35.5613	31.2074		26.2264	22.8327	33.1195	0.863257	3.43016	8.07451	16.2568	1.50086	119.353	5.1065	0.756352	5.03823		7.76814			9.55932	36.1001	0.208484	3.21069	0.748717	4.48387	43.9437	1.26566	0.0351795	147.759	69.1586		21.0022	3.70794	2.01107	29.2963	2.70553	231.932	7.72673	6.16914	7.44762	32.6317		1.57553	14.4007	3.32539	81.7814	0.0878502
Set432	47.3299	6.43539	49.5943	14.7018		24.5217	22.8749	34.0896	1.2055	5.54809	7.49444	12.3101	1.19983	178.796	6.14125	0.398109	10.1951		8.85429		79.0718	10.1156	36.1001	0.208484	5.9569	1.15737	5.08365	68.5938	2.41628	0.0417842	221.347	71.9155		26.395	3.70794	6.9524	73.1548	3.91301	53.7439	7.72673	5.63981	7.47142	22.0189		1.71384	14.4007	13.1635	46.0807	0.0844382
Set433	48.2912	6.43539	31.3097	18.2062		23.5144	20.7764	34.0896	0.942191	3.43016	7.49444	15.897	1.23708	178.796	8.36604	0.756352	5.03823		10.7588			10.3341		0.343061	3.21069	1.15737	6.82496	23.8984	2.28896	0.0351795		164.731	408.271	23.3304	3.99359	2.01107	48.1872	4.96656	268.201	7.95833	5.78013	6.976	40.5495		0.408836	14.4007	5.69468	102.37	0.0870369
Set434	251.958	28.7192	31.3097	14.7018		28.2743	20.7764	33.1195	0.980235	6.06092	7.59344	23.7059	1.17614	263.989	6.14125	0.398109	14.2625		2.76687			7.11904		0.294582	3.21069	0.748717	4.33288	43.9437	2.311	0.0302683		171.69		26.395	3.64917	8.16582	66.6309	3.55941	189.435	8.57751	5.78013	10.0723	8.21714		0.408836	14.4007	5.69468	88.2577	0.0733301
Set435		6.43539	21.7895	14.7018		23.5144	20.7764	38.4968	0.977652	3.43016	7.82076	15.897	1.17614	119.353	5.1065	0.580128	14.1954	10.7767	11.6778			9.55932	37.8822	0.208484	8.98037	1.46491	5.61221	23.8984	2.54361	0.0251246	147.759	69.1586	1190.86	17.757	3.75932	9.75247	25.652	2.70553	115.109	14.2659	5.63981	8.43289	38.2527		0.657648	65.191	3.32539	52.2467	0.0733301
Set436	35.174	6.43539	48.5531	18.2062		26.3399	22.6611	38.4968	0.863257	3.72627	7.59344	12.3101	1.19983	178.796	6.95962	0.477056	17.8797		2.76687	300.113	394.928	7.78599	36.1001	0.208484	5.2887	0.953044	4.17741	16.0376	2.54951	0.045656		212.423		28.0829	4.27732	5.9043	30.6617	3.39892	183.807	7.95833	5.63981	10.4431	31.576		0.408836	40.4402	3.32539	88.2577	0.0733301
Set437	42.4344	20.3646	48.1469	27.1919		26.2264	23.7044	32.2555	0.863257	3.72627	8.04619	7.63173	3.69928	267.18	5.1065	0.756352	14.1954		10.2107			9.46655	36.1001	0.208484	8.62603	0.953044	2.4026	23.8984	2.36562	0.0251246	147.759	69.1586		30.5607	4.27732	10.3488	25.652	3.55941	181.018	7.79658	5.80275	6.976	6.53812		0.408836	14.4007	2.88527	26.2761	0.0870729
Set438	29.3093	28.6497	21.7895	18.2062		22.9963	21.9763	33.1195	0.927279	3.43016	6.31717	38.0969	1.23708	119.883	5.78264	0.46671	5.03823	10.7767	9.81631	279.021	46.7608	9.46655	39.3233	0.359521	3.21069	1.18812	4.33288	23.8984	2.69156	0.0417842		250.664	1190.86	29.2034	3.64917	8.16582	48.1872	3.55941	115.109	7.79658	5.78629	7.0537	36.8886		0.408836	14.4007	4.40396	38.5825	0.0844382
Set439		28.6497	31.5962	18.2062		22.9963	28.4046	33.841	1.10047	3.43016	7.49444	17.2964	5.56411	69.3526	6.14125	0.50709	10.1951		2.76687			9.47711	36.1001	0.208484	5.83287	1.15737	4.98034	23.8984	1.26566	0.045656	147.759	70.0343	1789.52	17.757	3.28053	2.01107	29.2963	2.6803	231.932	8.8037	5.51173	10.8707	8.21714		0.408836	17.732	3.32539	76.0162	0.0844382
Set440	35.174	6.43539	42.1696	14.7018		26.2264	21.9763	34.0896	0.977652	3.43016	7.49444	16.2568	3.69928	69.3526	10.9182	0.537117	5.03823		2.76687	325.79		7.11904		0.213599	6.42234	0.748717	4.48387	16.0376	1.26566	0.0351795	147.759	212.423		26.395	3.64917	5.9043	29.2963	2.6803	115.109	12.0099	6.3335	10.0723	27.6427		0.408836	63.2772	3.32539	26.2761	0.0733301
Set441	46.3685	6.43539	21.7895	18.2062		24.5217	20.7764	34.0896	0.980235	4.78571	7.39543	23.7059	3.69928	221.206	7.71052	0.398109	18.6347		4.17057		79.0718	9.01195		0.230555	6.42234	0.748717	4.0084	64.4429	1.28637	0.0565236		69.1586		17.702	3.84608	7.29413	30.6617	3.75541	53.7439	7.72673	5.78013	8.58981	27.6427		1.80375	14.4007	5.69468	44.7485	0.0733301
Set442	38.5003	36.7565	48.5531	31.2074		24.5217	22.6611	34.0896	0.863257	4.7652	6.97391	12.3101	1.19983	69.3526	7.78936	0.398109	5.03823	10.7767	4.17057	279.021	46.7608	9.23925	37.8822	0.294582	5.83287	0.92433	2.4026	16.0376	1.26566	0.0251246		71.9155		21.0022	3.64917	2.01107	26.7772	2.6803	53.7439	7.72673	5.51173	10.4431	6.53812		0.408836	14.4007	3.32539	26.2761	0.0733301
Set443	35.174	6.43539	46.9089	14.7018		23.9359	26.0828	32.3979	0.977652	3.43016	5.99084	16.729	4.74873	69.3526	6.72864	0.46671	10.1951		4.17057	279.021		9.46655		0.343061	9.89442	1.59568	12.8094	23.8984	2.54361	0.045656		296.127	1789.52	17.8968	3.64917	10.7939	30.6617	3.55941	115.109	7.79658	6.3335	10.254	40.5495		0.408836	14.4007	3.32539	58.4128	0.0733301
Set444	39.2062	20.3646	47.6499	19.9357		26.2264	32.437	32.9922	0.850156	2.76867	7.42665	17.9295	1.17614	368.801	11.0779	0.756352	18.2931		8.85429		84.6622	9.0897		0.230555	3.21069	0.748717	4.66134	43.9437	1.26566	0.0453523		69.1586		25.1286	3.70794	2.01107	31.0441	4.23061	115.109	9.37473	5.78013	10.3087	8.21714		0.657648	21.8759	4.92448	38.5825	0.0816487
Set445	48.2912	20.3646	47.6499	14.7018		24.5217	26.246	33.2478	0.942191	3.43016	5.35881	16.2568	6.58232	69.3526	8.36604	0.537117	14.2625		12.7515		46.7608	9.00815		0.230555	5.9569	0.748717	4.17741	64.4429	1.83219	0.0251246	147.759	69.1586		24.5768	4.27732	7.14109	26.7772	4.29948	53.7439	7.79658	6.3335	10.0723	6.53812		1.32948	19.9756	6.80712	26.2761	0.0733301
Set446		20.3646	62.5719	14.7018		12.6016	22.6611	29.282	0.927279	3.72627	5.21587	15.897	1.50086	253.726	6.14125	0.398109	10.1951		2.69315			7.11904	37.8822	0.86356	8.98037	1.15737	2.4026	23.8984	1.83219	0.0402038	221.347	220.36	1789.52	24.5768	4.53761	5.9043	56.8627	4.2666	115.109	7.79658	5.79144	10.254	8.21714		0.408836	62.6281	5.46381	38.5825	0.0733301
Set447	35.174	37.9099	30.8685	14.7018		25.2309	21.9763	28.024	0.942191	3.43016	7.49444	16.2568	1.50086	183.913	6.14125	0.398109	18.2931		11.6778			9.46655		0.213599	8.68369	1.8775	4.17741	27.3477	1.26566	0.0251246		70.91		31.0372	3.70794	5.9043	29.2963	2.6803	278.324	8.8037	6.3335	6.976	36.8886		0.408836	64.9114	4.52221	88.2577	0.0733301
Set448	35.174	6.43539	45.529	14.7018		21.4978	26.0828	29.282	0.549093	3.86287	5.21587	7.63173	1.19983	69.3526	4.7114	0.616071	19.7771		12.7515			7.11904	36.1001	0.208484	5.9569	0.92433	2.4026	46.2461	1.26566	0.0453523	147.759	70.0343		35.3053	3.64917	5.9043	29.2963	2.68945	53.7439	7.79658	5.80275	10.7653	8.21714		0.657648	64.9114	3.32539	26.2761	0.0864537
Set449	41.5916	20.3646	53.6595	18.2062		26.3399	22.6611	32.3979	1.09207	3.72627	7.46054	16.729	1.49295	182.853	6.49766	0.724461	5.03823		2.61943	279.021		10.8238	37.8822	0.230555	8.68369	0.748717	4.17741	16.0376	1.26566	0.0302683	147.759	164.731		31.1111	3.64917	11.097	31.0441	2.6803	188.202	7.95833	5.78629	10.7653	37.4014		1.80375	19.9756	3.32539	31.0842	0.0733301
Set450	35.174	28.7192	52.6713	24.1697		21.9528	20.7764	35.2762	0.784323	4.7652	7.49444	12.3101	1.19983	119.353	7.21268	0.477056	10.1951		11.6778	279.021	266.343	7.78599	36.1001	0.213599	5.83287	1.18812	4.66134	27.3477	1.26566	0.0351795		69.1586		17.757	4.06172	6.9524	29.2963	2.68945	53.7439	7.79658	5.79144	9.47695	6.53812		0.657648	68.3469	4.40396	26.2761	0.0851543
Set451	275.957	6.43539	31.3097	28.4365		22.9963	21.9505	29.282	0.549093	3.43016	5.21587	12.3101	1.19983	183.913	7.21268	0.398109	14.1954		12.7515		46.7608	9.46655		0.213599	5.9569	0.748717	4.17741	16.0376	1.26566	0.0251246		164.731		25.1286	3.70794	7.32979	26.7772	3.75541		7.72673	5.80275	10.8707	26.1098		0.657648	40.4402	5.46381	88.2577	0.0858704
Set452	48.2912	20.3646	21.7895	14.7018		21.4978	18.7967	49.1357	0.977652	3.43016	7.59344	16.729	1.23708	69.3526	6.72864	0.50709	8.99574		14.5101		46.7608	7.78599		0.213599	5.9569	0.92433	4.98034	23.8984	1.28637	0.0251246		171.69		17.757	3.28053	2.01107	75.3275	2.70553	53.7439	7.79658	5.72371	6.976	6.53812		0.408836	21.8759	2.88527	88.2577	0.0895017
Set453	35.174	20.3646	41.8543	30.1919		25.2309	20.7764	48.3083	0.980235	4.78571	7.41104	29.2052	4.80438	119.353	6.14125	0.74285	18.6347		12.7515	279.021	84.6622	10.2606	36.1001	0.470466	5.83287	1.18812	4.66134	53.0703	1.28637	0.0351795		70.91		31.6616	3.64917	5.9043	66.6309	2.6803	231.932	7.79658	5.78629	7.44762	26.1098		0.408836	14.4007	5.23508		0.0844382
Set454	46.3685	20.3646	28.1715	26.6639		28.7905	22.8749	29.282	0.863257	3.72627	8.19155	24.1388	1.49295	183.913	6.49766	0.686211	14.2625		8.85429		79.0718	7.78599	36.1001	0.208484	8.91495	1.59568	2.4026	20.6382	2.54951	0.0351795	221.347	69.1586		27.615	4.27732	6.9524	48.1872	2.6803	53.7439	9.37473	5.78013	7.47142	31.7851		0.817671	40.4402	5.00636	46.0807	0.0733301
Set455	44.6829	28.6497	21.7895	14.7018		26.5395	23.7044	44.9554	0.980235	3.43016	7.39543	7.63173	1.17614	173.678	11.0779	0.537117	10.1951	10.7767	12.7694			10.8238	37.8822	0.213599	5.83287	0.748717	4.0084	27.3477	2.41969	0.0302683	147.759	212.423	408.271	22.7586	4.01121	2.01107	29.2963	2.6803	115.109	7.79658	5.78013	7.0537	6.53812		0.408836	43.1557	4.53049	88.2577	0.0733301
Set456		51.9164	53.1301	14.7018		23.5144	20.7764	33.841	0.850156	3.43016	7.49444	17.2964	2.1769	182.853	3.99419	0.616071	8.99574		4.33957		46.7608	10.7319		0.343061	8.96992	1.15737	4.48387		2.23818	0.0351795		69.1586	1789.52	26.395	4.01121	7.32979	30.6617	2.70553	115.109	9.44459	5.80275	6.976	31.7851		1.71384	35.3216	7.19645	108.322	0.0844279
Set457		36.7565	21.7895	18.2062		26.2264	20.7764	38.4968	0.942191	3.43016	7.42665	15.897	1.17614	182.853	5.30405	0.50709	26.3719		10.2107	279.021	46.7608	7.11904	36.1001	0.208484	8.68369	0.748717	5.79787	45.0385	2.54951	0.045656		69.1586	1190.86	27.615	3.81162	5.9043	29.2963	5.18658	231.932	11.0926	6.10755	6.976	6.53812		0.657648	19.9756	4.52221	46.0807	0.0851543
Set458	35.174	6.43539	30.8685	14.7018		26.3399	22.8327	49.045	0.863257	2.76867	7.49444	7.63173	1.17614	69.3526	6.14125	0.46671	14.1954	10.7767	4.33957			10.7319	36.1001	0.208484	3.21069	1.56506	4.0084	43.9437	1.28637	0.0351795		70.91	408.271	17.8968	3.84608	2.01107	29.2963	4.96656	222.838	8.8037	6.3335	7.47142	8.21714		0.817671	14.4007	4.40396	88.2577	0.0807134
Set459	67.3085	6.43539	25.938	14.7018		26.2264	21.9763	33.1195	0.980235	3.43016	8.2461	12.3101	1.19983	178.796	6.14125	0.616071	18.6347	10.7767	4.17057		79.0718	9.46655		0.25409	5.9569	0.748717	4.48387	16.0376	1.28637	0.0417842		212.423	408.271	23.0654	4.4242	7.32979	29.2963	5.15502	176.809	7.77747	5.63981	6.976	31.7851		0.408836	14.4007	5.00636	46.0807	0.0733301
Set460		6.43539	21.7895	14.7018		26.2264	21.9763	34.0896	0.977652	6.30434	7.59344	29.2052	5.58206	173.678	8.36604	0.477056	14.1954	10.7767	12.7515			7.11904	37.8822	0.208484	5.83287	1.18812	4.17741	44.1707	1.26566	0.0302683		70.91	1190.86	27.5875	3.99359	7.14109	68.8573	2.68945	186.621	11.0926	5.80275	9.61248	26.1098		0.408836	19.9756	3.32539	26.2761	0.133966
Set461		6.43539	21.7895	30.2121		23.9359	22.6611	59.0039	0.942191	3.43016	8.38573	17.9295	1.17614	183.913	9.64394	0.756352	17.8797		7.22234	466.629		7.78599		0.294582	8.68369	0.953044	5.18696	43.9437	2.36562	0.0402038	221.347	278.466	1190.86	24.5768	3.81162	7.14109	75.3275	3.55941	115.109	8.8037	5.80275	10.4431	8.21714		0.817671	82.4404	5.69468	26.2761	0.0864537
Set462	45.8086	20.3646	48.1469	14.7018		26.3399	22.6611	31.2195	0.784323	4.78571	8.07451	16.729	1.49295	69.3526	8.28076	0.46671	19.3977	10.7767	12.7694			11.1001	39.3233	0.208484	3.21069	0.92433	4.48387	16.0376	2.6032	0.0565693		69.1586		24.5768	4.01121	2.01107	30.6617	3.75541	231.932	11.0926	5.78013	7.47142	6.53812		0.408836	62.6281	2.88527	81.7814	0.0864537
Set463		26.4087	41.8543	18.2062		25.2309	22.6611	29.282	0.977652	5.22704	7.83637	15.897	4.76275	69.3526	6.14125	0.798041	14.1954	10.7767	7.76814			9.23925	37.8822	0.294582	8.81237	1.05622	4.17741	46.2461	2.54951	0.0251246		69.1586		24.5768	3.64917	5.9043	29.2963	2.6803	115.109	11.0926	5.79144	6.976	31.7851		1.53865	19.9756	4.52221	73.1132	0.0733301
Set464		6.43539	21.7895	30.1919		25.2309	21.9763	29.282	0.977652	3.72627	5.92884	7.63173	1.17614	173.678	6.14125	0.724461	10.1951		10.7588		394.928	6.32316	37.8822	0.208484	5.83287	0.748717	2.4026	16.0376	2.54951	0.0565693		70.91		17.757	3.84608	6.9524	30.6617	5.29965		7.66008	5.78013	8.43289	26.1098		0.408836	62.6281	3.32539	102.37	0.0733301
Set465	46.3685	20.3646	47.6799	30.2121		24.9872	22.6611	26.974	0.980235	3.72627	7.49444	7.63173	1.19983	173.678	8.36604	0.398109	12.3961		10.2107		79.0718	7.11904	36.1001	0.211041	5.9569	1.15737	4.0084	72.7446	1.26566	0.0435683		70.0343	408.271	17.702	3.28053	7.32979	26.7772	4.23061	53.7439	7.75641	5.78013	7.47142	27.6427		0.408836	14.4007	5.69468	26.2761	0.0733301
Set466	251.958	6.43539	48.1469	30.2121		12.6016	29.5655	30.5318	0.977652	3.43016	7.49444	18.336	1.23708	183.913	6.14125	0.398109	12.3961		10.7588			10.6416		0.213599	8.62603	1.18812	4.0084	23.8984	1.26566	0.0683904	147.759	220.36		30.8209	3.70794	7.32979	68.8573	3.39892	115.109	7.79658	5.63981	8.43289	41.0581		1.57553	21.8759	3.32539	58.0988	0.079833
Set467	35.174	28.7192	47.6799	14.7018		26.3399	22.8749	39.1416	0.863257	4.7652	7.78447	16.2568	1.50086	263.989	7.71052	0.616071	18.6882		4.17057			9.46655		0.213599	6.42234	0.748717	6.82496	53.0703	2.46969	0.0251246		70.0343	1190.86	26.395	3.64917	7.14109	26.7772	2.68945	115.109	7.65687	5.63981	6.976	53.2567		0.408836	14.4007	4.52221	38.5825	0.0733301
Set468		33.2798	21.7895	40.6891		26.3399	21.9763	29.282	0.977652	3.86287	7.59344	12.3101	1.19983	178.796	7.33111	0.616071	5.03823	10.7767	2.76687	279.021	79.0718	9.47711		0.954426	5.2887	1.15737	2.4026	32.291	1.26566	0.0251246	221.347	69.1586	1789.52	27.5875	3.70794	7.32979	31.0441	3.55941	282.847	11.0926	5.51173	6.976	36.0389		1.57553	14.4007	2.88527	58.0988	0.0844382
Set469	35.174	90.9033	21.7895	18.2062		22.9963	21.9763	33.2478	0.784323	3.43016	4.38824	16.2568	6.06591	69.3526	8.60957	0.477056	14.2625		2.76687	300.113		9.0897		0.213599	8.96992	0.748717	4.17741	16.8122	1.26566	0.0417842		69.1586		26.395	4.06172	2.01107	29.2963	4.23061	100.547	11.7677	5.78013	7.47142	27.6427		2.35915	17.732	2.88527	26.2761	0.108379
Set470		6.43539	48.1469	30.2121		26.3399	21.9763	32.3979	0.977652	3.43016	7.91977	16.2568	6.41538	69.3526	6.14125	0.398109	14.1954	10.7767	4.17057	279.021	266.343	9.55932	36.1001	0.208484	5.83287	0.748717	6.82496	23.8984	1.83219	0.0402038	147.759	69.1586	408.271	26.395	4.27732	5.9043	73.1548	4.23061	222.838	8.8037	5.80275	10.0723	22.0189		0.657648	19.9756	5.46381	52.2467	0.0844382
Set471	251.958	6.43539	25.938	14.7018		11.973	23.7044	32.2555	0.784323	3.43016	7.49444	7.63173	1.19983	69.3526	5.30405	0.50709	5.03823	10.7767	2.76687			10.8238	37.8822	0.294582	5.9569	1.15737	2.4026	23.8984	2.42025	0.0507678	147.759	69.1586		28.2054	3.81162	2.01107	56.8627	2.6803	53.7439	8.57751	5.78013	6.976	6.53812		0.408836	71.472	5.69468	83.0284	0.0876861
Set472	275.957	6.43539	47.6799	18.2062		26.3399	31.9043	29.282	0.977652	2.76867	7.49444	7.63173	1.17614	173.678	7.21268	0.537117	5.03823		12.7694			7.11904	36.1001	0.208484	5.2887	0.92433	4.48387	79.0849	1.28637	0.0351795	221.347	171.69		17.8968	3.70794	5.9043	48.1872	2.6803		7.44635	5.51173	11.3894	26.1098		0.817671	19.9756	2.88527	46.0807	0.0844382
Set473	48.2912	20.3646	30.8685	18.2062		26.3399	21.9763	32.3979	0.971162	3.43016	7.49444	12.3101	1.17614	178.796	8.28076	0.756352	10.1951	10.7767	4.17057		46.7608	7.78599	37.8822	0.343061	3.21069	0.748717	4.17741	18.3379	1.83219	0.0453523		69.1586	408.271	24.5768	3.99359	7.32979	30.6617	6.15215	53.7439	7.72673	5.78013	7.0537	8.21714		0.657648	17.732	4.52221	93.9337	0.0733301
Set474	41.5916	6.43539	48.5531	18.2062		24.5217	21.9763	46.0037	0.977652	2.76867	9.28229	16.2568	6.06591	69.3526	6.14125	0.398109	10.1951		7.22234	279.021		7.11904	36.1001	0.208484	6.42234	1.15737	4.48387	24.0335	1.26566	0.0351795		70.0343		17.702	4.8614	2.01107	29.2963	4.23061	231.932	7.95833	5.78013	7.47142	8.21714		1.32948	19.9756	8.82201	83.0284	0.0733301
Set475	251.958	28.6497	53.6595	14.7018		21.4978	21.9763	34.0896	1.02615	3.72627	7.59344	18.336	4.74873	119.883	7.92492	0.477056	5.03823	10.7767	2.76687	342.514		7.11904	39.3233	0.213599	3.21069	1.18812	4.48387	16.0376	1.26566	0.0302683	147.759	212.423		22.7586	4.02358	8.6506	48.1872	2.6803	177.672	7.95833	5.78013	7.45952	31.7851		0.408836	14.4007	3.32539	58.4128	0.0733301
Set476	275.957	34.6806	45.1131	14.7018		22.9963	21.9505	34.0896	0.942191	5.22704	9.50751	7.63173	6.06591	173.678	11.0779	0.477056	5.03823		2.76687		394.928	9.01195	37.8822	0.208484	5.83287	0.748717	4.17741	32.291	2.311	0.0435683		164.731	408.271	26.395	3.77153	8.16582	29.2963	2.6803	53.7439	8.57751	6.2988	7.47142	27.6427		0.817671	66.3359	10.5539	58.4128	0.0844382
Set477	35.174	28.6497	31.5962	14.7018		27.7372	21.9763	33.1195	0.942191	2.76867	7.49444	16.2568	1.17614	182.853	5.1065	0.477056	18.6065		4.33957		266.343	7.78599		0.343061	5.2887	0.863183	4.0084	16.0376	2.64937	0.0402038	147.759	70.0343	1190.86	17.3768	3.64917	2.01107	29.2963	4.2666	115.109	7.79658	5.78013	10.0723	31.576		0.657648	17.732	3.32539	46.0807	0.0870729
Set478	35.174	28.6497	35.5613	36.7476		22.9963	22.8327	29.282	0.784323	3.43016	4.38824	16.2568		173.678	6.14125	0.477056	14.1954		9.43942		46.7608	7.78599		0.208484	3.21069	0.748717	5.61221	16.0376	1.28637	0.0302683	147.759	69.1586		21.0022	3.64917	2.01107	30.6617	3.91301	115.109	7.95833	5.80275	5.10641	26.1098		0.408836	66.3359	3.32539	88.2577	0.0733301
Set479	35.174	6.43539	24.2137	31.2074		29.248	22.6611	28.024	0.863257	3.43016	4.38824	15.897	5.56411	69.3526	6.14125	0.398109	16.6789		4.33957		46.7608	9.23735	36.1001	0.208484	10.5534	0.748717	4.48387	15.0673	2.42025	0.0417842		69.1586	1190.86	17.8968	4.09176	7.14109	25.652	3.39892	100.547	7.72673	5.80275	8.43289	8.21714		1.57553	62.6281	8.82201	58.4128	0.0733301
Set480	35.174	6.43539	31.5962	30.2121		24.5801	21.9763	46.0037	0.977652	3.43016	5.21587	16.729	1.17614	178.796	8.36604	0.398109	16.6789		8.85429			9.46655	36.1001	0.208484	3.21069	1.15737	4.48387	23.8984	2.54361	0.0402038		69.1586		17.757	3.99359	8.6506	88.2247	2.6803	222.838	7.79658	4.72465	7.47142	27.6427		0.408836	21.8759	3.32539	26.2761	0.0844382
Set481	45.8086	20.3646	21.7895	14.7018		24.2355	20.7764	32.3979	0.977652	5.22704	8.1603	29.2052	1.49295	69.3526	6.49766	0.398109	15.6379		2.76687		46.7608	7.78599	36.1001	0.230555	3.21069	0.91908	4.0084	47.7364	2.54361	0.0453523	147.759	71.9155	1789.52	24.5768	3.28053	5.9043	30.6617	5.55785	231.932	7.66008	5.79144	10.0723	27.6427		0.408836	14.4007	2.88527	38.5825	0.0733301
Set482	41.5916	6.43539	21.7895	19.9357		25.2309	26.0286	39.1416	0.977652	3.72627	8.07451	7.63173	1.19983	69.3526	5.1065	0.477056	8.99574		2.76687		79.0718	9.55932	36.1001	0.213599	5.9569	0.748717	2.4026	15.0673	1.28637	0.0302683	221.347	69.1586	408.271	31.3008	3.81162	2.01107	30.6617	6.21623	179.624	9.44459	5.63981	8.58981	8.21714		1.80375	14.4007	4.40396	38.5825	0.0858704
Set483			21.7895	36.7325		28.9467	22.8327	21.8579	0.977652	3.43016	8.30485	30.7032	1.17614	245.804	9.64394	0.923336	5.03823		9.43942		84.6622	9.01195		0.208484	3.21069	0.92433	4.0084	18.3379	1.26566	0.0351795		70.91		17.8968	4.59169	7.29413	30.6617	5.94819	53.7439	7.65687	5.51173	5.10641	22.0189		0.817671	17.732	4.92448	108.322	0.0882693
Set484	35.174	26.9198	48.5531	31.0361		22.9963	20.7764	34.0896	1.02615	3.43016	8.07451	16.6425	4.74873	228.828	6.14125	0.580249	8.99574		14.3901		46.7608	7.11904		0.208484	6.42234	0.748717	2.4026	68.5938	1.26566	0.0351795		70.91		24.5768	3.70794	2.01107	48.1872	2.70553	53.7439	7.79658	5.79144	6.976	31.7851		1.53865	14.4007	3.32539	26.2761	0.0870729
Set485	67.3085	20.3646	31.5962	14.7018		26.3399	20.7764	33.1195	0.980235	4.2591	6.76623	16.729	3.69928	311.264	6.14125	0.756352	10.1951		2.76687			8.71285	37.8822	0.230555	5.2887	1.15737	2.4026	27.3477	1.26566	0.0351795		71.9155		17.8968	3.84608	2.01107	31.0441	2.72223	115.109	11.0926	6.3335	8.78001	22.0189		0.657648	14.4007	3.32539	58.0988	0.0878502
Set486	35.174	75.1832	48.5531	14.7018		25.5668	21.9763	32.6782	0.784323	3.72627	7.49444	16.6425	1.23708	119.353	7.33111	0.537117	14.2625		4.17057	325.79	46.7608	9.46655	39.3233	0.213599	8.68369	0.748717	10.3765	24.0335	1.26566	0.0453523	147.759	69.1586	1190.86	17.702	3.99359	7.14109	58.5222	4.2666	268.201	11.0926	5.78013	7.44762	39.8722		0.408836	14.4007	3.32539	58.0988	0.0895017
Set487	41.5916	6.43539	31.5962	18.2062		21.4978	21.9763	44.9554	1.32988	3.77719	7.39543	18.336		183.913	6.14125	0.398109	12.3961		2.76687		266.343	11.1001	36.1001	0.230555	5.2887	1.15737	4.17741	15.0673	1.28637	0.0302683		269.925	1190.86	24.5768	4.27732	9.74277	76.5999	5.87674	53.7439	11.7677	5.78013	9.61248	8.21714		0.408836	62.6281	4.52221		0.0639706
Set488	44.6829	6.43539	47.6799	14.7018		22.9963	20.7764	73.9448	0.863257	5.49408	6.77767	16.9885	5.60193	183.913	8.60957	1.05826	18.6882		10.7588		79.0718	7.11904		0.208484	5.83287	0.748717	5.61221	23.8984	1.26566	0.0417842		275.292		24.5768	3.64917	5.9043	31.0441	2.6803	181.018	7.72673	5.63981	7.45952	26.1098		0.817671	14.4007	5.69468	26.2761	0.0733301
Set489	41.5916	20.3646	21.7895	37.5195		28.7905	21.9763	38.4968	0.982369	5.22704	7.59344	16.729	1.50086	183.913	3.99419	0.537117	16.6277		13.0152		266.343	10.7319	37.8822	0.208484	3.21069	1.18812	5.75339	15.0673	1.83219	0.0565693		69.1586	1190.86	23.3304	3.28053	2.01107	30.6617	2.6803	53.7439	7.87746	6.16914	8.43289	27.6427		1.53865	14.4007	5.00636	52.2467	0.0858704
Set490	275.957	6.43539	61.7492	14.7018		24.507	21.9763	33.1195	0.980235	5.43159	8.0618	12.3101	1.19983	69.3526	6.14125	0.398109	5.03823	10.7767	2.76687	279.021		7.78599		0.374761	8.68369	0.748717	2.4026	10.7516	1.26566	0.0402038		69.1586		17.8968	3.70794	7.32979	29.2963	3.77702		8.57751	4.72465	10.0723	26.1098		1.93322	43.1557	4.52221	26.2761	0.0844382
Set491	275.957	28.7192	30.8685	30.2121		30.123	22.6611	29.282	0.549093	4.70088	8.07451	16.2568	1.23708	69.3526	8.28076	0.616071	12.4786	10.7767	8.85429	279.021		9.46655		0.208484	5.83287	0.748717	5.4126	16.7657	2.311	0.0351795		69.1586	408.271	22.7586	3.28053	5.9043	29.2963	2.6803	115.109	7.87746	5.78013	8.43289	28.3715		0.408836	70.6365	4.40396	88.2577	0.0844382
Set492		6.43539	31.5962	18.2062		22.9963	22.8327	33.841	0.980235	3.43016	7.42665	7.63173	1.17614	119.353	6.14125	1.27632	10.1951		2.76687		79.0718	7.11904	36.1001	0.294582	5.83287	1.15737	4.66134	15.0673	1.26566	0.0351795		69.1586		17.702	3.70794	2.01107	48.1872	4.96656	115.109	7.95833	5.80275	8.58981	40.4652		1.05943	14.4007	4.52221	26.2761	0.0733301
Set493	35.174	6.43539	48.5531	30.2121		23.5144	22.8749	26.974	0.784323	3.43016	7.42665	7.63173	1.23708	69.3526	5.30405	0.398109	14.1954		4.17057		79.0718	9.46655		0.208484	6.42234	0.953044	12.1568	32.291	2.41969	0.064592		70.91		25.1286	4.27732	2.01107	29.2963	2.6803	181.018	7.79658	6.16914	8.43289	8.21714		1.53865	19.9756	2.88527	38.5825	0.0730713
Set494	35.174	36.4746	24.2137	18.2062		26.3399	21.9763	29.282	0.863257	3.72627	7.42665	12.3101	1.19983	183.913	8.36604	0.537117	5.03823	10.7767	10.2107			7.78599		0.208484	5.2887	0.92433	4.33288	27.3477	2.54951	0.0402038	221.347	71.9155		17.757	3.64917	2.01107	31.0441	2.72223		7.79658	4.72465	10.8707	27.6427		1.53865	75.5818	4.52221	58.4128	0.0844382
Set495	57.7998	20.3646	31.5962	18.2062		26.3399	20.7764	33.1195	0.977652	3.43016	8.98767	12.3101	1.19983	178.796	6.14125	0.537117	5.03823		2.76687	279.021	79.0718	9.46655	36.1001	0.294582	5.2887	0.92433	4.17741	45.0385	1.26566	0.0251246		269.925		23.3304	3.64917	7.32979	30.6617	2.6803	53.7439	7.79658	5.51173	7.44762	8.21714		0.408836	65.191	3.32539	38.5825	0.0918615
Set496	35.174	26.9198	48.1469	14.7018		24.3853	25.1042	32.2555	0.977652	4.70088	8.30485	7.63173	1.19983	173.678	3.99419	0.537117	16.6277		2.61943			7.11904		0.208484	5.83287	0.748717	5.18696	45.0385	1.26566	0.0251246		69.1586	1789.52	21.0022	3.81162	8.16582	29.2963	2.72223	100.547	8.57751	4.72465	7.47142	31.576		0.408836	21.8759	3.32539	38.5825	0.0844382
Set497		6.43539	21.7895	14.7018		31.1557	21.9763	31.9261	0.980235	2.76867	8.24105	18.336	6.58232	182.853	7.68584	0.477056	12.3961		8.85429		394.928	7.78599	36.1001	0.208484	5.2887	1.40399	2.4026	16.8122	1.26566	0.0402038		69.1586	408.271	21.0022	3.07539	2.01107	30.6617	2.6803	179.624	7.65687	5.79144	8.58981	31.576		0.408836	14.4007	3.32539	38.5825	0.0851543
Set498	35.174	20.3646	48.1469	14.7018		28.7905	22.8327	34.0896	0.942191	4.70088	7.49444	12.3101	1.19983	182.853	6.95962	0.616071	5.03823		15.132		79.0718	7.11904		0.505343	5.2887	0.748717	4.17741	16.0376	1.28637	0.0402038	221.347	78.1269	1190.86	17.8968	3.64917	2.01107	29.2963	2.6803	231.932	7.95833	5.78013	10.3087	26.1098		0.817671	19.9756	5.9206	31.0842	0.0733301
Set499		6.43539	31.5962	14.7018		23.9359	21.9763	29.282	0.977652	2.76867	8.98767	16.2568	1.17614	183.913	11.0779	0.537117	18.7971		4.17057			7.11904		0.343061	6.42234	0.748717	4.33288	46.4113	2.41969	0.0302683	221.347	71.9155	408.271	30.2846	3.28053	7.32979	30.6617	2.6803	188.202	7.95833	5.80275	10.3087	27.6427		0.657648	66.3359	4.92448	26.2761	0.079833
Set500	38.5003	28.7192	31.3097	18.2062		23.165	22.8327	38.4968	0.977652	2.76867	8.2461	16.9885	1.19983	55.853	12.3956	0.74285	10.1951		8.85429		79.0718	7.11904		0.208484	3.21069	0.748717	4.66134	16.0376	2.46969	0.0351795	211.245	69.1586	1190.86	22.7586	3.70794	7.32979	77.7759	4.29948	282.847	7.65687	5.78013	6.976	22.0189		0.408836	19.9756	4.53049	46.0807	0.0844382
Set501	43.98	20.3646	21.7895	14.7018		26.3399	25.1042	28.024	1.02615	3.86287	8.98767	15.897	1.17614	69.3526	8.28076	0.910391	17.9346		2.76687	279.021	46.7608	7.11904	39.3233	0.208484	5.2887	0.748717	5.18696	15.0673	1.26566	0.0251246		71.9155		26.395	3.84608	5.9043	91.8406	4.23061	115.109	10.7549	5.78013	7.0537	27.6427		2.49195	53.5555	2.88527	58.0988	0.0844382
Set502	35.174	25.0538	30.8685	30.1332		24.5801	20.7764	34.0896	0.784323	3.43016	7.59344	7.63173	1.19983	173.678	6.49766	0.398109	20.411	10.7767	10.7588			7.90013	36.1001	1.40351	5.9569	0.92433	2.4026	46.3875	1.28637	0.0543341		69.1586	1789.52	31.6616	3.05974	2.01107	31.0441	2.68945	53.7439	7.87746	5.78013	9.02068	32.6317		0.408836	19.9756	3.32539	38.5825	0.0870729
Set503	41.5916	20.3646	31.5962	14.7018		23.5144	20.7764	29.282	0.977652	3.72627	7.59344	15.897	3.69928	69.3526	8.36604	0.398109	12.3961		4.17057			7.11904	36.1001	0.208484	5.2887	1.15737	2.4026	16.8122	2.55043	0.0402038		212.423	1789.52	25.1286	3.28053	7.29413	66.6309	2.68945	231.932	9.44459	10.0579	9.61248	31.576		1.93322	21.8759	2.88527	58.0988	0.0733301
Set504		28.7192	47.6799	18.2062		23.9359	23.7044	21.8579	0.784323	3.43016	7.49444	7.63173	1.19983	69.3526	4.7114	0.46671	17.8797		2.76687			9.55932	36.1001	0.208484	3.21069	1.40399	4.0084	10.7516	2.12622	0.0351795	211.245	70.0343		29.2034	4.01121	7.14109	30.6617	3.55941	53.7439	8.8037	5.78013	6.976	6.53812		1.93322	19.9756	2.88527	26.2761	0.0878502
Set505		6.43539	21.7895	31.2074		22.9963	20.7764	29.282	1.158	5.05745	7.59344	7.63173	1.19983	173.678	5.1065	0.537117	12.3961		10.2107			9.55932	36.1001	0.208484	5.83287	1.15737	5.75339	23.8984	1.26566	0.0351795		69.1586		17.757	3.99359	7.32979	29.2963	3.81476	115.109	7.79658	4.72465	8.43289	6.53812		0.408836	14.4007	4.52221	26.2761	0.0844382
Set506		28.7192	21.7895	31.2074		26.3399	22.6611	30.5318	0.982369	3.72627	7.87026	12.3101	1.19983	178.796	7.21268	0.756352	14.1954		2.76687		79.0718	7.78599	37.8822	0.260688	5.83287	1.15737	4.17741	27.3477	1.28637	0.0251246	221.347	264.784		21.0022	3.28053	7.32979	31.0441	5.18658	115.109	9.44459	6.10755	6.976	36.0389		1.57553	14.4007	3.32539	38.5825	0.0844382
Set507	44.6829	6.43539	41.8543	29.6301		28.7905	21.9763	34.0896	0.977652	5.38904	8.07451	23.7059	1.23708	259.558	8.28076	0.477056	14.1954		11.6778			9.47711		0.343061	5.83287	0.92433	4.0084	16.0376	2.46969	0.0565236	211.245	70.91	1190.86	23.3304	3.70794	5.9043	102.501	5.55785	53.7439	7.87746	5.78013	10.254	31.576		0.408836	62.6281	2.88527	26.2761	0.0844382
Set508	114.816	28.6497	57.0274	18.2062		26.7417	22.8327	34.0896	0.549093	3.43016	8.28544	16.9885	5.58206	178.796	5.1065	0.477056	14.2625		2.76687	279.021		10.7319		0.294582	5.2887	0.748717	4.17741	15.0673	1.26566	0.0402038		71.9155	408.271	17.8968	4.58302	5.9043	66.6309	5.08892	53.7439	7.75641	5.80275	8.58981	54.4729		1.80375	14.4007	2.88527	48.4976	0.0733301
Set509	38.5003	26.9198	21.7895	14.7018		26.2264	22.8327	34.0896	0.784323	3.43016	7.49444	16.4512	9.87632	69.3526	6.14125	0.729877	14.2625		10.2107			10.7171		0.208484	5.9569	1.15737	4.17741	23.8984	2.42025	0.0302683		71.9155	408.271	21.0022	3.99359	6.9524	75.3275	3.81476		7.95833	5.78013	8.43289	31.576		0.817671	62.6281	4.40396	38.5825	0.0870729
Set510	41.5916	26.9198	62.5719	35.4188		24.5801	21.9763	32.3979	1.07547	3.72627	7.59344	16.6425	1.50086	183.913	6.14125	0.537117	18.6882		4.17057			7.11904		0.25409	3.21069	0.748717	2.4026	15.0673	1.26566	0.0565236				23.3304	4.01121	5.9043	88.2247	2.6803	53.7439	8.8037	5.78013	7.47142	8.21714		0.817671	51.6703	3.32539	58.4128	0.0733301
Set511	35.174	20.3646	21.7895	14.7018		26.2264	20.7764	29.282	0.977652	3.43016	8.26983	16.6425	1.17614	182.853	7.92492	0.398109	10.1951		7.22234	279.021	79.0718	7.90013		0.230555	5.83287	0.748717	4.0084	45.0385	2.32183	0.0302683		250.664		28.2983	3.64917	2.01107	31.0441	5.18492	53.7439	7.95833	5.51173	8.58981	8.21714		2.35915	64.9114	4.40396	108.322	0.0733301
Set512	44.6829	36.4746	21.7895	18.2062		21.4978	20.7764	32.6782	0.863257	6.06092	7.49444	7.63173	8.69815	69.3526	10.9182	0.616071	5.03823	10.7767	2.76687	300.113	79.0718	7.11904	37.8822	0.213599	8.62603	0.748717	2.4026	27.3477	2.46969	0.0417842		220.36	1789.52	24.5768	3.70794	2.01107	29.2963	2.6803	53.7439	12.1411	5.78013	11.3894	8.21714		0.817671	53.5555	5.69468	31.0842	0.0733301
Set513		6.43539	45.529	34.3843		26.2264	21.9763	32.2555	0.863257	4.78571	8.19155	16.9885	1.29945	183.383	7.22734	0.46671	14.1954		2.76687		79.0718	9.46655	37.8822	0.470466	5.83287	0.953044	4.0084	16.0376	1.83219	0.0467243	221.347	69.1586		22.7586	4.01121	2.01107	31.0441	2.6803	231.932	8.8037	5.78013	10.254	31.7851		0.408836	14.4007	4.52221	52.2467	0.0882693
Set514	35.174	28.7192	31.3097	36.2081		21.4978	20.7764	31.9261	0.980235	4.70088	7.59344	15.897	1.73818	263.989	5.30405	0.46671	12.3961		4.17057		46.7608	7.11904		0.230555	3.21069	0.748717	4.0084	20.6382	2.54361	0.0351795		69.1586		26.395	4.41164	2.01107	26.7772	2.70553	115.109	8.91785	5.78629	7.44762	26.1098		0.408836	14.4007	4.52221	38.5825	0.0895017
Set515	275.957	25.0538	30.8685	18.2062		24.3853	23.7044	48.3083	0.977652	4.70088	7.39543	16.9885	1.17614	245.804	6.14125	0.477056	18.2931		2.76687			7.11904	39.3233	0.208484	8.91495	1.15737	2.4026	15.0673	2.311	0.0302683		69.1586	408.271	24.5768	3.70794	2.01107	66.6309	4.2666	181.018	8.57751	6.3335	6.976	8.21714		1.99292	43.1557	4.40396	93.9337	0.0882693
Set516	48.2912	28.6497	21.7895	14.7018		22.9963	21.9763	32.3979	1.03907	4.70088	7.59344	12.3101	1.19983	178.796	7.21268	0.398109	18.6347		9.43942	300.113	394.928	9.46655	36.1001	0.208484	5.2887	0.748717	5.61221	16.0376	2.42025	0.0351795		69.1586		23.0654	3.99359	2.01107	29.2963	3.75541		7.79658	5.63981	7.44762	8.21714		0.657648	14.4007	2.88527	26.2761	0.0870369
Set517	35.174	6.43539	21.7895	36.7476		26.3399	21.9763	31.2195	0.942191	5.38904	6.97391	7.63173	1.23708	183.383	5.78264	0.398109	12.3961		12.7515			10.4124	36.1001	0.230555	5.2887	1.15737	5.3891	29.764	2.5686	0.0351795		69.1586	1789.52	17.702	3.77153	7.14109	31.0441	2.6803	53.7439	7.72673	5.80275	6.976	26.1098		0.408836	14.4007	2.88527		0.0882693
Set518		28.6497	41.8543	18.2062		26.3399	21.9763	29.282	0.549093	3.72627	7.41104	12.3101	1.19983	178.796	8.36604	0.398109	5.03823	10.7767	2.76687	279.021	266.343	7.11904		0.213599	5.2887	0.748717	4.17741	45.0385	1.83219	0.0402038	147.759			23.3304	3.70794	5.9043	30.6617	3.77702	53.7439	8.57751	5.78013	6.976	31.576		0.408836	14.4007	3.32539	173.208	0.0733301
Set519		28.6497	31.3097	14.7018		24.2355	20.7764	33.841	0.850156	5.05436	7.59344	16.9885	4.74873	69.3526	6.72864	0.756352	17.1811	10.7767	2.76687	374.165		11.1001	36.1001	0.208484	5.83287	1.42014	4.48387	18.3379	1.26566	0.045656		69.1586		24.5768	4.53761	10.1136	76.5999	3.75541	53.7439	11.0926	5.80275	8.43289	31.576		0.408836	68.3469	3.32539	38.5825	0.0858704
Set520	35.174	28.6497	24.2137	18.2062		21.4978	22.8327	32.6782	0.942191	6.27979	7.59344	16.2568	1.17614	183.913	8.60957	0.50709	5.03823		11.6778			11.4805	37.8822	0.294582	3.21069	0.92433	4.0084	16.0376	2.48165	0.0543341	221.347	70.91		17.757	3.64917	11.097	66.6309	3.55941		7.87746	5.51173	7.44762	31.576		1.80375	19.9756	4.92448	26.2761	0.0844382
Set521	35.174	36.2953	48.5531	14.7018		26.3399	21.9763	33.2478	0.977652	3.72627	7.59344	15.897	1.23708	183.913	7.21268	0.537117	20.7572		12.7694		46.7608	7.11904	36.1001	0.208484	9.44137	0.748717	4.0084	34.0688	1.26566	0.0435683		70.0343	1789.52	24.5768	4.4242	7.32979	29.2963	4.96656	53.7439		5.63981	9.61248	26.1098		2.02031	19.9756	7.19645	58.0988	0.0878502
Set522	35.174	6.43539	45.2074	19.9357		25.2309	22.8327	46.0037	1.07547	5.50261	6.76623	7.63173	1.19983	69.3526	6.14125	0.398109	14.1954	10.7767	7.69442			7.11904	36.1001	0.230555	3.21069	0.92433	5.79787	23.8984	1.26566	0.045656			408.271	28.2054	4.41164	6.9524	31.0441	2.72223	53.7439	8.8037	5.78013	9.61248	31.7851		0.408836	66.3359	3.32539	38.5825	0.0733301
Set523	38.5003	38.6049	21.7895	28.4365		11.973	21.9763	29.282	0.784323	3.72627	8.46268	16.2568	1.50086	119.883	5.1065	0.50709	14.1954		2.76687	279.021	46.7608	7.11904	37.8822	0.208484	3.21069	0.92433	4.0084	23.8984	1.28637	0.0251246		220.36		22.7586	3.99359	11.097	46.5125	2.6803	186.621	7.44635	5.78013	11.3894	27.6427		1.97223	19.9756	2.88527	83.0284	0.0844382
Set524			46.8896	14.7018		29.248	22.6611	33.841	1.01063	4.03738	8.2461	18.336	9.87632	69.3526	8.28076	0.923336	5.03823		2.76687		79.0718	7.11904		0.294582	9.89442	1.15737	4.0084	16.8122	1.28637	0.0402038		70.91		22.7586	3.70794	5.9043	26.7772	4.2666	53.7439	7.65687	4.72465	8.43289	26.1098		0.657648	53.5555	4.52221	48.4976	0.133966
Set525	47.3299	26.4087	62.5719	19.9357		26.2264	25.1042	33.1195	0.980235	5.13144	7.46054	7.63173	1.19983	69.3526	6.72864	0.477056	8.99574		2.61943		46.7608	9.01195	39.3233	0.294582	3.21069	0.953044	4.48387	16.8122	1.00072	0.0351795		296.127		29.2034	4.09176	2.01107	31.0441	3.55941	231.932	8.91785	5.78013	7.47142	26.1098		2.41205	14.4007	6.66849	31.0842	0.0733301
Set526	45.8086	20.3646	21.7895	31.2074		24.2355	30.6518	72.3325	1.61701	3.72627	7.46054	12.3101	1.19983	178.796	6.14125	0.398109	17.1811	10.7767	12.7515		266.343	7.11904	36.1001	0.25409	5.9569	0.748717	5.41668	27.3477	1.83219	0.0302683		212.423	408.271	31.0372	3.99359	7.29413	29.2963	4.2666	249.277	12.1411	5.78013	7.0537	26.1098		0.657648	14.4007	7.19645	58.0988	0.0733301
Set527	36.8207	28.7192	21.7895	30.1919		22.9963	22.6611	33.2478	0.863257	2.76867	8.46268	15.897	2.1769	182.853	6.14125	0.798041	18.6347		13.0152		46.7608	7.11904	37.8822	0.208484	5.83287	1.15737	2.4026	16.8122	2.5686	0.0251246		69.1586	1789.52	30.5607	5.16967	2.01107	48.1872	2.6803	268.201	7.79658	6.16914	6.976	26.1098		0.408836	14.4007	4.52221	88.2577	0.0733301
Set528	41.5916	28.6497	61.7492	18.2062		26.2092	21.9763	29.282	1.07547	3.43016	8.46268	16.9885	1.17614	183.913	7.21268	0.477056	17.1811		11.6778	279.021	46.7608	7.78599	36.1001	0.208484	5.83287	0.953044	4.0084	72.7446	2.28896	0.0402038	221.347	268.835		22.7586	4.84488	5.9043	48.1872	2.6803	183.807	8.91785	5.78013	6.976	6.53812		1.53865	19.9756	2.88527	58.4128	0.0844382
Set529	67.3085		39.2562	19.9357		24.5801	22.8327	33.841	1.02615	4.03738	7.49444	16.2568	1.17614	253.726	7.78936	0.398109	5.03823		8.09591			7.11904		0.230555	3.21069	0.748717	2.4026	43.9437	2.41969	0.0565236	221.347	69.1586	408.271	21.0022	3.84608	2.01107	29.2963	5.42564	53.7439	10.0265	6.10755	6.976	27.6427		0.408836	70.6365	4.40396	31.0842	0.0733301
Set530		6.43539	30.8685	14.7018		21.4978	20.7764	28.024	0.942191	6.07134	7.42665	12.3101	1.19983	69.3526	6.95962	0.398109	5.03823		2.76687	279.021	46.7608	9.46655	36.1001	0.208484	8.55377	1.15737	2.4026	16.0376	1.26566	0.0302683		69.1586		31.0372	3.70794	10.1136	31.0441	3.75541	53.7439	7.87746	5.78013	10.0723	6.53812		0.408836	19.9756	4.53049	26.2761	0.0882693
Set531	41.5916	28.7192	21.7895	30.1919		26.2264	22.8327	34.0896	0.942191	3.43016	7.59344	7.63173	1.19983	119.353	7.92492	0.537117	14.1954		2.76687			10.5199		0.294582	5.9569	0.748717	5.61221	43.9437	1.54893	0.0351795		69.1586		17.757	3.99359	7.14109	31.0441	5.56536	53.7439	7.77747	6.10755	7.47142	8.21714		0.817671	14.4007	6.80712	44.7485	0.0733301
Set532	35.174	6.43539	24.2137	18.2062		28.5161	21.9763	49.7816	0.863257	5.22704	8.98767	12.3101	1.17614	69.3526	6.14125	0.910391	10.1951		12.7515	300.113		10.7319		0.343061	5.61405	0.748717	4.66134	16.0376	1.26566	0.0402038		287.006	1190.86	22.7586	3.70794	10.1136	26.7772	2.72223	53.7439	7.65687	5.78013	7.47142	27.6427		0.817671	66.3359	5.00636	76.8624	0.08697
Set533		28.6497	47.6799	14.7018		11.973	25.1042	32.3979	0.942191	4.78571	7.41104	16.2568	2.1769	274.803	6.02126	0.537117	18.6115		10.7588		46.7608	9.23925		0.294582	5.2887	1.15737	4.98034	16.0376	2.55043	0.0251246	211.245	69.1586		30.5693	3.70794	11.097	81.7761	2.6803	83.712	8.8037	5.78013	10.7653	26.1098		0.408836	62.6281	5.69468	75.305	0.0791169
Set534	38.5003	28.6497	21.7895	36.7476		27.7372	20.7764	33.841	0.971162	3.72627	7.59344	7.63173	4.63705	69.3526	3.99419	0.537117	21.584		2.76687	300.113	394.928	9.46655		0.208484	5.83287	1.15737	6.82496	16.0376	2.311	0.0351795		212.423	1789.52	23.0654	3.70794	7.29413	48.1872	2.70553	316.044	8.57751	5.78013	7.45952	41.0581		2.02031	19.9756	6.66849	26.2761	0.0844382
Set535	41.5916	6.43539	31.5962	14.7018		23.9359	22.6611	29.282	0.784323	1.4214	5.21587	15.897	1.49295	183.913	5.30405	0.923336	10.1951		10.7588			9.46655	36.1001	0.213599	8.68369	1.15737	4.17741	23.8984	1.26566	0.0251246	147.759	220.36	1190.86	17.757	4.4242	7.29413	30.6617	4.23061	115.109	8.8037	5.63981	7.45952	33.2472		0.408836	14.4007	3.32539	26.2761	0.0733301
Set536		20.3646	21.7895	18.2062		27.7372	21.9763	49.045	0.942191	3.43016	8.07451	7.63173	1.49295	253.726	6.14125	0.616071	10.1951		13.6864		46.7608	10.1156		0.208484	8.96992	0.748717	5.3891	16.0376	1.26566	0.0302683	211.245	69.1586		27.615	4.06172	7.32979	29.2963	3.81476		7.95833	5.80275	10.4431	6.53812		0.408836	14.4007	2.88527	26.2761	0.0733301
Set537		20.3646	21.7895	14.7018		22.1341	20.7764	29.282	0.863257	3.43016	4.38824	16.9885	4.80438	173.678	8.28076	0.923336	5.03823		2.76687		79.0718	7.11904	37.8822	0.208484	9.44137	0.748717	4.98034	16.8122	1.26566	0.0251246	147.759	71.9155	408.271	23.0654	2.05776	7.14109	31.0441	5.08892	233.102	8.57751	5.78013	8.43289	26.1098		2.49195	62.6281	7.95271	88.2577	0.0895017
Set538	53.7783	20.3646	21.7895	30.2121		21.9528	22.8327	33.1195	0.977652	5.22704	7.49444	7.63173	1.19983	173.678	8.28076	0.576594	5.03823	10.7767	9.43511		84.6622	10.7319	37.8822	0.213599	5.9569	0.92433	4.48387	16.0376	2.36562	0.0251246	211.245	69.1586	1190.86	17.757	3.70794	2.01107	29.2963	2.6803	177.672	7.65687	5.80275	9.61248	26.1098		0.657648	14.4007	4.40396	26.2761	0.0882693
Set539	67.3085	20.3646	21.7895	34.3843		26.3399	22.6611	31.2195	0.863257	5.22704	7.78447	18.336	1.17614	69.3526	6.14125	0.46671	5.03823		2.76687	279.021	79.0718	10.7319	37.8822	0.230555	6.42234	1.15737	4.33288	23.8984	2.6032	0.0467243		69.1586		17.757	3.64917	7.14109	31.0441	2.70553	53.7439	8.8037	5.51173	7.44762	6.53812		0.408836	68.3469	5.69468		0.0844382
Set540	41.5916	6.43539	48.1469	14.7018		22.9963	23.7044	58.6431	0.549093	3.43016	7.42665	16.729	5.56411	69.3526	7.92492	0.46671	14.2625		2.76687		84.6622	7.11904	36.1001	0.230555	5.83287	0.748717	4.48387	41.0638	2.54361	0.045656		220.36	1789.52	17.757	3.70794	6.9524	30.6617	5.55785		7.95833	5.63981	6.39537	6.53812		0.408836	14.4007	5.00636	116.483	0.0733301
Set541	61.1881	6.43539	31.5962	14.7018		21.4978	21.9763	21.8579	0.977652	4.70088	9.14423	7.63173	1.23708	173.678	10.4495	1.01092	12.3961	10.7767	11.6778		79.0718	7.11904	36.1001	0.807022	8.91495	1.46491	4.66134	15.0673	2.12622	0.0417842		260.295	408.271	30.8209	4.59169	5.9043	30.6617	4.23061		7.4253	4.72465	10.3087	40.8264		1.53865	19.9756	5.69468	93.9337	0.0733301
Set542	37.8389	60.267	21.7895	24.1697		21.4978	21.9763	32.3979	0.850156	5.94591	7.49444	16.2568	5.60193	245.804	3.40529	0.477056	18.6347		8.85429		266.343	9.46655	37.8822	0.208484	5.2887	0.92433	4.48387	16.0376	1.26566	0.0351795	211.245	69.1586	1789.52	24.5768	3.81162	7.32979	25.652	3.39892	115.109	7.79658	5.63981	10.0723	6.53812		1.97862	14.4007	2.88527	26.2761	0.0844279
Set543	35.174	36.2953	31.3097	14.7018		25.2309	25.1042	36.4628	0.977652	3.72627	7.49444	16.6425	3.26056	69.3526	6.02126	0.477056	18.6882		12.7694		46.7608	7.11904		0.208484	8.91495	1.39249	5.41668	18.3379	2.311	0.0701855		69.1586	1789.52	24.2295	4.27732	10.7939	66.6309	2.68945	115.109	10.0265	5.78013	8.58981	6.53812		0.408836	62.6281	5.46381	93.9337	0.109511
Set544	67.3085	6.43539	21.7895	18.2062		23.9359	21.9763	32.3979	0.977652	2.76867	7.59344	12.3101	1.19983	182.853	6.14125	1.05585	5.03823		12.7694		79.0718	9.01195		0.208484	5.2887	1.18812	4.0084	16.0376	2.46969	0.0351795	147.759	212.423		17.702	3.81162	7.32979	31.0441	2.6803	98.0799	7.87746	5.51173	8.43289	31.576		0.408836	40.4402	3.32539	88.2577	0.0733301
Set545	35.174	28.7192	31.5962	14.7018		23.5144	21.9505	33.1195	0.980235	3.72627	7.39543	16.9885	1.73818	69.3526	5.1065	0.616071	10.1951		7.22234	300.113		6.32316	37.8822	0.359521	5.83287	1.15737	4.17741	16.8122	1.83219	0.0251246		269.925		26.395	3.64917	2.01107	30.6617	4.2666	115.109	8.57751	5.80275	8.43289	31.7851		0.657648	66.3359	5.69468	88.2577	0.0733301
Set546	35.174	6.43539	41.8543	14.7018		23.9359	21.9763	28.024	1.07547	3.43016	5.21587	15.897	1.17614	183.913	7.21268	0.537117	10.1951		13.6864		79.0718	11.1001	36.1001	0.213599	9.44137	1.79114	4.0084	47.7364	1.28637	0.0351795		70.0343		17.702	3.84608	6.9524	26.7772	2.6803	115.109	7.72673	5.78629	6.99172	27.6427		0.657648	62.6281	3.32539	46.0807	0.0733301
Set547	162.124	36.4746	21.7895	18.2062		26.7417	18.7967	28.024	0.982369	3.43016	7.49444	7.63173	1.17614	119.883	8.28076	0.616071	5.03823		2.76687	279.021	266.343	9.46655		0.343061	5.83287	0.92433	4.17064	23.8984	2.46969	0.0351795		171.69		23.3304	3.05974	2.01107	88.0733	3.39892	231.932	7.95833	5.78013	10.8707	28.3715		0.408836	19.9756	2.88527	83.0284	0.0733301
Set548	45.8086	6.43539	21.7895	18.2062		26.2264	21.9763	38.4968	0.971162	3.72627	7.51004	7.63173	2.1769	69.3526	9.64394	0.477056	16.3865		2.76687	300.113		10.3341		0.208484	3.21069	0.748717	4.0084	16.8122	1.26566	0.0251246		71.9155	408.271	26.395	4.41072	7.32979	29.2963	4.23061	231.932	7.79658	5.63981	5.10641	26.1098		0.817671	62.6281	6.80712	46.0807	0.108379
Set549	35.174	6.43539	24.2137	30.1919		26.2264	25.4361	46.0037	0.942191	3.43016	5.21587	16.0853	1.17614	69.3526	7.71052	0.616071	5.03823		2.76687			7.11904		0.213599	8.62603	1.15737	4.48387	23.8984	1.26566	0.045656		71.9155	408.271	22.7586	3.28053	5.9043	29.2963	4.23061	245.125	7.44635	5.80275	6.976	31.576		0.657648	14.4007	3.32539	52.2467	0.109511
Set550	35.174	20.3646	31.5962	14.7018		26.3399	20.7764	31.4423	0.977652	3.43016	8.0618	15.897	1.23708	173.678	11.0779	0.477056	12.3961		8.85429			7.11904	37.8822	0.343061	5.9569	0.92433	4.0084	10.7516	2.42025	0.0417842	221.347	70.91		31.0372	3.05974	5.9043	30.6617	4.23061	181.018	7.95833	5.79144	6.976	31.7851		0.408836	19.9756	3.32539	93.9337	0.0844382
Set551	38.5003	28.6497	31.3097	18.2062		28.5161	20.7764	28.024	1.03907	3.72627	6.92441	16.6425	1.50086	69.3526	5.30405	0.756352	5.03823		2.76687	342.514	46.7608	7.78599		0.343061	8.98037	0.92433	5.18696	18.3379	1.26566	0.0433572	147.759	220.36		23.3304	3.28053	2.01107	29.2963	2.70553	115.109	12.1411	5.63981	7.45952	26.1098		2.49195	19.9756	2.88527	58.4128	0.0844382
Set552	35.174	38.6049	48.1469	31.2074		26.3399	20.7764	50.0701	0.927279	3.43016	7.49444	16.2568	3.69928	69.3526	6.02126	0.616071	18.6882		4.33957	279.021		9.01195	36.1001	0.208484	3.21069	0.92433	5.4126	45.0385	1.26566	0.0402038		264.784		23.3304	3.81162	7.29413	29.2963	2.6803	53.7439	8.91785	5.79144	10.4431	6.53812		0.408836	14.4007	3.32539	38.5825	0.0733301
Set553		36.2953	48.1469	30.2121		23.5144	34.6251	33.841	0.942191	5.13144	8.69694	16.2568	5.56411	182.853	8.28076	0.756352	8.99574		10.7588		394.928	9.46655		0.213599	5.83287	0.748717	4.0084	32.291	1.26566	0.0251246		212.423	1190.86	26.395	4.27732	2.01107	25.652	5.08892	278.324	7.95833	5.63981	6.976	8.21714		0.408836	14.4007	2.88527	58.0988	0.0878502
Set554	41.5916	38.6049	24.2137	18.2062		22.9963	21.9763	33.1195	0.977652	5.94591	9.28229	16.729	7.00608	183.913	6.14125	0.398109	14.2625		10.7588		79.0718	10.2606	36.1001	0.807022	5.9569	1.15737	4.0084	72.7446	1.26566	0.0351795	221.347	70.91		24.5768	3.81162	2.01107	29.2963	2.6803	176.809	7.79658	5.78013	8.58981	8.21714		1.71384	19.9756	9.21028	46.0807	0.0844382
Set555		6.43539	21.7895	14.7018		22.9963	21.9763	44.9554	0.980235	4.78571	9.14423	7.63173	1.17614	173.678	7.21268	0.616071	10.1951	10.7767	13.01			7.11904	36.1001	0.213599	8.68369	0.953044	5.4126	16.0376	2.311	0.0417842	221.347	71.9155	408.271	17.702	4.09176	9.66449	25.652	2.70553	53.7439	7.66008	4.72465	7.45952	6.53812		0.657648	62.6281	2.88527	31.0842	0.0733301
Set556	77.0175	20.3646	59.4655	14.7018		26.2264	21.9763	38.4968	1.10047	1.4214	5.21587	12.3101	1.19983	69.3526	6.14125	0.398109	17.8797		12.1307	279.021		7.78599	37.8822	0.260688	9.18296	1.15737	4.48387	15.0673	1.26566	0.0251246				26.395	4.01121	2.01107	29.2963	4.23061	115.109	8.57751	5.80275	8.58981	40.5495		0.408836	64.9114	4.40396	48.4976	0.0733301
Set557	35.174	28.7192	48.5531	31.2074		23.165	21.9763	38.4968	1.01063	3.43016	5.94134	15.897	1.17614	69.3526	6.14125	0.398109	10.1951		2.76687	279.021		9.0897	36.1001	0.208484	8.68369	1.15737	4.17741	24.0335	2.54951	0.0351795		264.565	1190.86	17.757	3.28053	6.9524	77.7759	4.23061	188.202	7.79658	5.63981	10.4431	36.8886		1.05943	64.9114	3.32539	26.2761	0.0902923
Set558			46.9089	30.1332		23.9359	20.7764	32.3979	1.158	3.43016	8.07451	7.63173	1.19983	173.678	7.44926	0.403903	8.99574	10.7767	4.17057			9.46655	36.1001	0.294582	5.83287	1.18812	4.48387	27.3477	1.26566	0.0433572	211.245	212.423	408.271	30.5607	3.28053	2.01107	29.2963	4.23061	53.7439	12.8703	5.78013	7.44762	6.53812		1.53865	14.4007	3.32539	26.2761	0.0844382
Set559		26.9198	21.7895	18.2062		28.2743	22.8327	32.2555	0.549093	3.43016	5.21587	16.6425	2.1769	183.913	5.30405	0.395367	14.1954		7.83388		46.7608	7.78599	36.1001	0.208484	5.2887	0.953044	6.05945	16.8122	2.28896	0.0251246	147.759			31.3008	3.99359	2.01107	25.652	3.77702	115.109	7.79658	5.63981	6.976	27.6427		1.93322	40.4402	3.32539	103.158	0.0844382
Set560	124.325	20.3646	48.5531	14.7018		29.248	21.9763	39.1416	0.863257	3.43016	7.59344	17.9295	1.17614	173.678	11.0779	0.395367	17.8797		2.76687	300.113	79.0718	7.78599		0.427333	5.83287	0.748717	4.0084	16.8122	1.26566	0.0417842	147.759	317.144	1190.86	27.615	3.64917	6.9524	31.0441	2.6803	115.109	12.3873	5.79144	8.43289	28.3715		0.657648	53.5555	7.19645	81.7814	0.0844382
Set561	45.8086	6.43539	49.5943	14.7018		21.4978	20.7764	28.024	1.21857	3.72627	8.07451	16.2568	3.69928	384.467	6.14125	0.756352	8.99574	10.7767	2.76687		46.7608	7.78599	39.3233	0.230555	8.68369	1.66728	2.4026	24.0335	1.83219	0.0435683	221.347	69.1586	408.271	30.5607	3.64917	5.9043	29.2963	2.6803	268.201	7.95833	5.78013	10.8707	6.53812		0.657648	63.2772	4.52221	26.2761	0.0733301
Set562		28.6497	30.8685	34.968		23.9359	21.9763	38.4968	0.971162	4.03738	8.98767	12.3101	1.19983	178.796	11.0779	0.477056	14.1954		4.33957		79.0718	10.7319		0.208484	5.9569	1.46491	4.0084	18.3379	2.54361	0.0402038		260.295	1190.86	24.5768	3.28053	6.9524	30.6617	4.2666	231.143	8.57751	6.54667	7.0537	6.53812		0.408836	17.732	7.19645	130.436	0.0844382
Set563	47.3299	26.9198	25.938	14.7018		28.2743	22.6611	46.0037	0.980235	3.86287	7.59344	16.6425	1.17614	274.803	6.14125	0.756352	16.3865		4.33957		46.7608	9.46655		0.208484	5.83287	1.05622	4.48387	16.0376	2.54951	0.0251246		70.91		22.7586	3.77153	7.14109	25.652	5.55785	115.109	7.72673	4.72465	8.43289	8.21714		1.05943	40.4402	5.69468	81.7814	0.0895017
Set564	251.958	28.7192	25.3164	18.2062		29.248	26.246	34.0896	1.21857	3.43016	7.49444	29.2052	1.49295	228.828	6.14125	0.398109	14.2625		4.17057			9.00815		0.213599	3.21069	0.748717	4.48387	49.0132	2.41969	0.064592			1789.52	21.0022	3.70794	5.9043	31.0441	2.6803	181.018	7.65687	4.72465	10.254	31.576		0.408836	53.5555	5.94457	46.0807	0.0733301
Set565		6.43539	21.7895	14.7018		28.9467	22.6611	33.2478	0.784323	3.43016	7.49444	16.729	3.69928	55.853	7.92492	0.477056	5.03823	10.7767	2.61943			7.11904		0.294582	8.62603	0.92433	4.66134	16.8122	2.42025	0.0351795		69.1586	1789.52	22.7586	3.05974	2.01107	48.1872	2.6803	188.202	11.7677	6.53499	6.976	6.53812		0.408836	62.6281	5.46381	31.0842	0.0844382
Set566		6.43539	42.1696	34.5342		23.9359	18.7967	33.1195	0.980235	5.36888	7.39543	16.2568	6.06591	183.913	7.71052	0.756352	14.1954		4.17057	279.021	46.7608	11.1001		0.294582	3.21069	0.650039	4.81939	16.0376	2.36562	0.0599147		78.1269	408.271	25.1286	3.28053	2.01107	29.2963	4.96656	115.109	7.79658	5.63981	6.976	8.21714		0.408836	14.4007	2.88527	58.4128	0.0733301
Set567	45.8086	26.9198	39.8356	14.7018		30.7339	21.9763	25.4157	0.980235	5.38904	7.51004	16.729	1.49295	126.633	7.41867	0.477056	10.1951		11.6778	279.021	46.7608	7.11904		0.260688	6.42234	0.92433	4.0084	33.7386	1.83219	0.0565693		70.91	1190.86	31.1111	4.4242	6.9524	30.6617	2.6803		7.72673	5.80275	6.976	26.1098		1.32948	14.4007	5.69468	31.0842	0.0733301
Set568	67.3085	26.4087	58.7114	32.4913		25.2309	21.9763	49.1357	1.18961	3.72627	7.49444	7.63173	2.1769	173.678	8.28076	0.756352	5.03823	10.7767	2.76687			7.11904	37.8822	0.213599	5.83287	1.15737	4.99858	32.291	2.42025	0.0302683	211.245	70.91	1190.86	17.8968	4.01121	2.01107	26.7772	2.68945	169.812	8.57751	6.10755	10.0723	26.1098		0.408836	17.732	5.69468	46.0807	0.0870369
Set569	113.855	28.6497	25.3164	14.7018		24.5217	22.8327	38.4968	0.863257	3.72627	8.98767	16.6425	4.80438	311.264	6.14125	0.576594	12.3961		8.85429			7.11904	37.8822	0.213599	3.21069	0.92433	4.48387	16.0376	2.54951	0.0543341	211.245	71.9155		23.3304	3.84608	2.01107	76.5999	2.68945	115.109	7.65687	5.78013	10.254	26.1098		0.408836	19.9756	4.52221	31.0842	0.0733301
Set570		26.4087	35.5613	30.2121		26.2264	21.9763	34.0896	0.942191	3.72627	7.59344	15.897	6.58232	69.3526	4.7114	0.475992	14.1954	10.7767	4.17057	279.021		7.11904	36.1001	0.25409	8.91495	0.953044	8.00254	44.1707	2.311	0.0302683	221.347			24.5768	3.28053	10.7939	29.2963	4.02394		7.65687	5.51173	10.254	40.5495		1.05943	66.3359	5.23508	26.2761	0.0733301
Set571	86.7265	6.43539	24.2137	14.7018		30.7339	21.9763	32.3979	0.980235	5.38904	7.42665	7.63173	1.17614	69.3526	7.21268	0.46671	10.1951		2.76687	300.113	84.6622	9.46655		0.213599	3.21069	1.05622	5.3891	34.0688	2.41628	0.0671363	221.347	69.1586	408.271	17.757	3.28053	5.9043	56.8627	2.6803	94.9183	8.8037	5.78013	9.47695	26.1098		0.408836	63.2772	3.32539	46.0807	0.0844382
Set572	36.8207	6.43539	21.7895	32.4913		26.3399	21.9763	44.9554	0.980235	5.38904	7.78447	12.3101	1.17614	126.633	6.72864	0.756352	5.03823		2.76687	279.021		11.1001	36.1001	0.208484	3.21069	1.15737	4.17064	23.8984	2.54361	0.0302683		70.91	408.271	17.757	3.99359	5.9043	30.6617	5.55785	233.102	12.3083	5.79144	7.44762	27.6427		1.32948	14.4007	5.00636		0.17161
Set573	35.174	6.43539	45.2074	18.2062		30.123	23.7044	54.0955	0.977652	6.6926	9.94696	23.7059	1.17614	173.678	8.36604	0.616071	12.3961	10.7767	10.2107			10.8238	36.1001	0.208484	5.83287	1.15737	4.0084	45.0385	2.22341	0.0543341		70.91		35.3053	4.06172	11.1188	29.2963	2.6803	53.7439	8.57751	5.80275	6.976	6.53812		0.657648	19.9756	4.92448	83.0284	0.0733301
Set574	37.8389	6.43539	21.7895	30.1919		28.7905	21.9763	29.282	0.977652	3.43016	8.81612	7.63173	1.49295	173.678	8.28076	0.616071	12.4786		7.22234	279.021	79.0718	11.4805		0.359521	5.83287	0.92433	4.17064	15.0673	1.26566	0.045656		220.36		17.757	3.99359	2.01107	30.6617	2.6803	53.7439	11.0926	5.78013	10.0723	6.53812		0.408836	43.1557	2.88527	26.2761	0.0844382
Set575		6.43539	30.8685	29.6301		26.2264	21.9763	32.3979	0.863257	4.78571	8.04619	12.3101	1.17614	178.796	9.64394	0.616071	14.1954		2.76687			7.11904	36.1001	0.208484	5.9569	0.748717	4.33288	15.0673	2.23818	0.0402038		69.1586		28.506	4.58302	7.14109	26.7772	2.6803	188.202	12.1411	6.54667	10.254	8.21714		1.32948	14.4007	2.88527		0.0864537
Set576	35.174	36.1926	59.4655	14.7018		26.3399	26.246	32.3979	0.863257	3.86287	7.42665	16.2568	1.17614	69.3526	8.36604	0.398109	17.1811	10.7767	12.1307	325.79	79.0718	9.01195	36.1001	0.230555	9.83807	1.40399	4.0084	16.0376	2.69408	0.0351795	221.347	69.1586		23.3304	3.05974	7.14109	30.6617	2.6803	233.102	7.79658	5.79144	9.61248	27.6427		0.817671	62.6281	4.40396	88.2577	0.174112
Set577	48.2912	33.4449	48.9698	14.7018		21.4978	22.8327	33.1195	0.982369	3.43016	7.42665	7.63173	6.06591	69.3526	7.21268	0.616071	5.03823		2.61943			12.1528		0.294582	5.2887	1.15737	2.4026	41.0638	1.28637	0.0351795		70.91	1190.86	24.5768	4.02358	5.9043	68.8573	2.70553	53.7439	11.9062	5.79144	6.976	31.576		0.408836	53.5555	2.88527	81.7814	0.0844382
Set578	35.174	31.6652	30.8685	30.1332		21.4978	20.7764	29.282	0.982369	2.76867	8.04619	16.9885	1.50086	178.796	6.14125	0.878072	5.03823		8.85429		46.7608	7.11904	36.1001	0.213599	3.21069	0.748717	2.4026	16.8122	1.26566	0.0671363		69.1586		17.757	3.05974	5.9043	26.7772	2.6803		7.95833	5.79144	10.254	6.53812		0.408836	21.8759	7.5422	93.9337	0.0844382
Set579	251.958	6.43539	21.7895	18.2062		11.973	22.6611	29.282	1.02615	5.22704	7.49444	16.729	1.49295	253.726	6.14125	0.398109	10.1951		2.76687			7.11904	36.1001	0.213599	6.42234	0.748717	4.81939	10.7516	2.12622	0.0302683		69.1586		27.615	3.70794	2.01107	26.7772	2.6803		7.79658	5.79144	10.8707	6.53812		2.35915	14.4007	2.88527	93.9337	0.171775
Set580	38.5003	60.267	48.5531	14.7018		30.123	21.9763	33.1195	0.982369	4.78571	7.39543	12.3101	1.19983	69.3526	8.28076	0.537117	14.2625		4.17057	279.021		7.11904		0.213599	8.68369	0.748717	4.66134	15.0673	2.34467	0.0402038		70.91		26.395	3.99359	2.01107	66.6309	4.2666	176.809	11.0926	6.3335	7.47142	32.6317		0.408836	17.732	5.46381	26.2761	0.0870729
Set581	251.958	28.6497	21.7895	14.7018		24.2355	21.9763	34.0896	0.942191	3.43016	7.49444	16.729	4.42534	178.796	6.95962	0.395367	18.2931		2.76687	279.021		9.46655	36.1001	0.294582	5.2887	0.92433	6.05945	16.0376	1.26566	0.0351795	221.347	70.91		22.7586	4.8614	2.01107	31.0441	2.6803		7.79658	5.80275	7.45952	26.1098		0.408836	21.8759	2.88527	26.2761	0.0895017
Set582	35.174	6.43539	21.7895	31.2074		26.3399	20.5575	29.282	0.980235	3.72627	8.2461	16.6425	4.80438	69.3526	5.30405	0.398109	21.2836	3.06696	4.17057			9.13608		0.343061	8.62603	1.59568	2.4026	16.8122	1.26566	0.0402038		269.925		17.8968	3.99359	2.01107	29.2963	4.23061	115.109	8.8037	6.10755	8.58981	8.21714		0.408836	19.9756	5.23508	93.9337	0.079833
Set583	35.174	25.0538	21.7895	29.6301		26.2264	21.9763	16.2027	0.977652	4.78571	7.42665	16.2568	1.17614	173.678	8.60957	0.537117	12.3961		2.76687		79.0718	13.0304		0.230555	3.21069	1.18812	4.98034	16.8122	1.26566	0.0757791		69.1586	1789.52	25.1286	4.27732	7.32979	29.2963	5.08892	115.109	8.9603	5.80275	12.7474	31.576		2.06332	70.6365	5.00636	81.7814	0.0733301
Set584	48.2912	36.7565	31.5962	19.9357		31.9168	21.9763	34.0896	0.927279	4.7652	7.49444	12.3101	1.19983	178.796	6.95962	0.477056	18.6347		4.17057			9.46655		0.230555	5.9569	1.18812	4.17741	31.7513	1.26566	0.0251246		71.9155		21.0022	4.4242	2.01107	31.0441	2.6803	226.99	7.77747	6.3335	13.0974	31.576		0.657648	71.5027	3.32539	46.0807	0.0844382
Set585	43.98	26.9198	21.7895	30.2121		22.9963	21.9763	32.6782	0.980235	3.72627	7.49444	15.897	1.73818	183.913	7.92492	0.910391	14.2625	10.7767	2.76687	325.79		7.78599	37.8822	0.764349	3.21069	0.92433	5.79787	50.4034	1.26566	0.0402038		70.91	408.271	23.3304	3.99359	9.66449	29.2963	3.75541	115.109	8.8037	5.63981	7.45952	8.21714		1.05943	62.6281	4.92448		0.0844279
Set586	36.8207	26.9198	31.5962	14.7018		21.4978	22.8327	31.2195	0.977652	4.70088	8.26983	16.9885	1.19983	178.796	8.60957	1.37473	5.03823		2.76687			10.7319	37.8822	0.294582	3.21069	1.3919	12.2697	16.8122	1.26566	0.0467243		69.1586		23.3304	3.64917	9.18751	80.9243	3.75541		7.95833	6.3335	7.47142	28.3715		0.408836	14.4007	8.51581	48.4976	0.0844382
Set587	45.5257	26.4087	21.7895	31.0361		11.973	22.6611	29.282	0.863257	3.43016	8.46268	16.2568	1.17614	69.3526	8.60957	0.398109	20.7572		2.76687		46.7608	7.11904	39.3233	0.343061	5.83287	1.18812	4.48387	66.052	1.49452	0.0523979	147.759	212.423		35.3053	3.70794	5.9043	64.7938	4.23061		7.4674	5.80275	6.976	6.53812		0.817671	19.9756	5.46381	58.0988	0.0895017
Set588	41.5916	26.9198	31.3097	14.7018		22.9963	21.9505	39.1416	0.977652	4.47735	7.73497	16.6425	4.84602	183.913	6.72864	0.616071	12.3961		2.76687		79.0718	7.11904		0.294582	3.21069	0.748717	14.1985	10.7516	1.26566	0.0251246		69.1586	408.271	28.2983	3.84608	8.16582	30.6617	4.96656	115.109	11.2189	5.80275	6.976	38.614		3.07968	14.4007	9.21028	31.0842	0.0895017
Set589	35.174	6.43539	21.7895	30.1919		22.9963	21.9763	33.841	0.850156	5.38904	8.07451	7.63173	3.26056	173.678	6.14125	0.398109	16.9057		2.76687	300.113		9.23925		0.208484	8.91495	0.748717	4.0084	46.2461	2.23818	0.0351795		69.1586		29.6678	3.81162	6.9524	31.0441	5.55785	268.201	10.0265	6.10755	6.99172	27.6427		0.408836	66.3359	2.88527	38.5825	0.0870369
Set590	38.3828	6.43539	21.7895	18.2062		11.973	20.7764	46.0037	0.977652	5.50261	7.49444	12.3101	1.19983	69.3526	6.84199	0.477056	10.1951		2.76687	300.113		9.46655	36.1001	0.294582	8.68369	1.18812	4.17741	15.0673	2.42025	0.0351795		78.1269	1190.86	17.757	3.81162	7.14109	29.2963	2.6803		7.79658	5.80275	6.976	27.6427		1.57553	65.191	4.76429	88.2577	0.0733301
Set591	35.174	6.43539	31.3097	31.2074		28.9467	22.8327	34.0896	1.07018	4.78571	8.26983	23.7059	3.26056	245.804	8.36604	0.46671	21.4441		2.76687			12.5145	36.1001	0.230555	10.001	0.92433	2.4026	16.8122	2.54361	0.0351795		70.0343		23.0654	3.28053	2.01107	68.8573	2.72223	189.435	8.57751	5.80275	10.4431	22.0189		0.657648	17.732	3.32539	58.4128	0.0844382
Set592			46.8896	30.1919		26.2264	23.7044	34.0896	0.784323	3.43016	8.36884	16.2568	3.69928	69.3526	11.0779	0.398109	17.7969		4.33957		46.7608	7.78599		0.213599	5.9569	0.92433	2.4026	16.8122	1.26566	0.0565236		69.1586	408.271	29.6678	4.06172	2.01107	29.2963	5.18658	53.7439	7.66008	5.63981	10.0723	27.6427		1.93322	14.4007	4.52221	26.2761	0.0870729
Set593	35.174	20.3646	21.7895	30.1332		24.5217	23.7044	34.0896	0.980235	4.79185	7.51004	7.63173	1.19983	173.678	10.4495	0.398109	8.99574		11.6778			7.78599	37.8822	0.213599	3.21069	1.15737	4.66134	16.8122	1.28637	0.0363182		264.565		23.0654	3.70794	11.097	25.652	2.6803	231.932	7.4253	5.78013	6.39537	26.1098		0.657648	19.9756	3.32539	130.436	0.0733301
Set594	35.174	6.43539	48.5531	31.2074		26.3399	26.0828	33.841	0.942191	3.86287	7.39543	23.7059	1.49295	69.3526	6.14125	0.537117	12.3961		12.7515			9.00815	37.8822	0.427333	8.62603	1.18812	4.17741	72.7446	2.42025	0.0453523	221.347	264.784		17.702	3.70794	5.9043	56.8627	2.6803	53.7439	8.57751	5.80275	8.43289	8.21714		0.657648	70.6365	7.95271	88.2577	0.0851543
Set595	35.174	6.43539	47.6499	18.2062		23.9359	20.7764	29.282	0.977652	4.55765	7.39543	12.3101	1.19983	69.3526	8.36604	0.616071	14.1954		4.17057	300.113		9.55932		0.294582	11.504	0.748717	4.33288	67.839	2.54951	0.0385853		69.1586	1789.52	31.6616	3.99359	5.9043	29.2963	3.55941		11.4604	6.3335	10.4431	28.3715		1.53865	17.732	2.88527	46.0807	0.0733301
Set596	57.7998	26.9198	21.7895	18.2062		26.2264	26.0828	28.024	1.02615	3.72627	7.49444	16.729		69.3526	6.95962	0.398109	16.9108		2.76687	279.021		9.46655		0.294582	8.68369	1.05622	2.4026	16.8122	1.26566	0.0453523		171.69	408.271	29.6678	3.70794	9.75247	73.1548	2.6803	53.7439	7.72673	7.79652	14.3449	6.53812		1.05943	14.4007	4.40396	26.2761	0.0895017
Set597	39.9284	6.43539	21.7895	30.1919		23.5144	23.7044	22.9363	0.977652	3.43016	8.46268	16.729	1.17614	182.853	7.71052	0.50709	16.7948		2.76687			9.01195	36.1001	0.208484	3.21069	1.8775	4.66134	16.8122	1.26566	0.0302683	221.347	171.69	1190.86	23.3304	3.64917	2.01107	30.6617	2.6803	115.109	7.95833	6.10755	7.47142	27.6427		0.408836	62.6281	4.40396	52.2467	0.0791169
Set598		28.6497	21.7895	19.9357		26.3399	21.9763	32.3979	0.927279	5.54631	7.83397	15.897	1.23708	69.3526	10.9182	0.537117	14.1954		7.22234	300.113	46.7608	9.46655	37.8822	0.343061	5.9569	1.15737	4.81939	16.8122	2.54361	0.0417842	221.347	220.36		30.5607	3.28053	2.01107	48.1872	4.23061	115.109	8.8037	5.78013	6.976	6.53812		1.77948	68.3469	4.40396	108.322	0.0733301
Set599	45.8086	75.1832	21.7895	14.7018		23.5144	23.7044	39.1416	1.21857	5.50261	10.4896	7.63173	5.60193	69.3526	10.4495	0.398109	10.1951		2.76687	279.021	46.7608	7.11904		0.208484	5.83287	1.40399	4.0084	64.4429	2.54361	0.0435683		171.69	408.271	27.615	3.70794	9.98623	26.7772	3.77702		7.87746	6.3335	10.4431	8.21714		0.657648	19.9756	2.88527	102.37	0.17061
Set600	38.5003	6.43539	24.2137	14.7018		23.5144	21.9763	33.841	0.942191	3.72627	8.05974	16.2568	1.49295	178.796	6.72864	0.477056	10.1951		2.76687		266.343	9.46655	36.1001	0.208484	3.21069	1.18812	4.17741	15.0673	1.28637	0.0351795		317.144		17.702	3.64917	2.01107	30.6617	2.6803	53.7439	7.95833	5.78013	7.47142	36.1513		0.817671	14.4007	5.69468	88.2577	0.0733301
Set601	35.174	6.43539	24.2137	14.7018		22.9963	20.7764	33.1195	0.977652	4.78571	7.39543	12.3101	1.19983	183.913	10.051	0.477056	14.1954	10.7767	13.6864			7.11904	36.1001	0.213599	5.9569	1.40399	4.17741	10.7516	1.26566	0.0351795		71.9155		30.5693	3.64917	6.9524	25.652	3.75541	53.7439	7.79658	5.63981	6.976	31.576		0.657648	62.6281	2.88527	52.2467	0.0791169
Set602		20.3646	21.7895	14.7018		23.9359	23.9896	33.841	0.850156	3.77719	8.07451	16.729	1.23708	183.913	5.30405	0.616071	21.291	10.7767	10.2107		46.7608	11.8296		0.294582	5.83287	1.46491	16.0231	24.0335	2.41969	0.0402038		70.91	1789.52	24.5768	3.70794	5.9043	30.6617	6.29172	233.102	7.72673	5.78013	8.43289	31.576		0.657648	21.8759	7.19645	58.4128	0.0878502
Set603	275.957	28.6497	21.7895	30.2121		24.3853	18.7967	32.3979	0.863257	6.30434	8.30485	18.336	8.17904	245.804	7.21268	0.616071	5.03823		2.76687		79.0718	7.11904		0.208484	8.96992	0.92433	4.0084	16.0376	2.54361	0.0351795	221.347	220.36		21.0022	3.70794	2.01107	30.6617	2.68945	222.838	7.95833	5.78013	7.47142	8.21714		0.817671	68.3469	3.32539	31.0842	0.0733301
Set604	67.5088	20.3646	24.2137	36.7325		26.3399	27.0558	61.738	0.850156	1.4214	7.49444	16.9885	6.06591	183.913	6.49766	0.50709	14.2625	10.7767	2.76687			7.11904		0.294582	3.21069	1.15737	2.4026	18.3379	1.26566	0.0251246	147.759	70.0343	1789.52	28.2983	3.99359	9.66449	29.2963	4.23061	115.109	8.8037	5.80275	10.0723	27.6427		1.71384	62.6281	4.92448	31.0842	0.0733301
Set605	41.5916	28.6497	39.638	36.4483		24.5801	21.9763	34.0896	0.784323	6.07999	8.98767	15.897	1.23708	178.796	5.1065	0.398109	16.6277		2.76687		79.0718	11.1001	37.8822	0.208484	5.9569	0.92433	2.4026	16.0376	2.42025	0.0417842		164.731	1789.52	17.8968	3.70794	2.01107	31.0441	2.6803	189.435	7.66008	5.80275	12.7474	27.6427		0.408836	14.4007	2.88527	93.9337	0.0844382
Set606		28.6497	30.8685	31.2074		23.9359	21.9763	29.282	1.02615	4.78571	7.42665	16.9885	5.22166	69.3526	6.02126	0.50709	14.1954	10.7767	9.43942	279.021		9.46655	39.3233	0.294582	5.83287	0.92433	4.0084	18.3379	2.54951	0.0385853		70.91	1190.86	21.0022	3.70794	10.1136	29.2963	3.39892	115.109	11.0926	5.80275	10.3087	8.21714		0.657648	14.4007	4.52221	93.9337	0.0733301
Set607	35.174	6.43539	48.1469	18.2062		26.3399	22.8327	32.2555	0.977652	4.70088	7.59344	7.63173	1.19983	173.678	6.14125	0.477056	16.6179	10.7767	7.76814		79.0718	7.11904	37.8822	0.208484	5.9569	0.92433	4.48387	10.7516	1.26566	0.0351795		69.1586		23.0654	3.70794	2.01107	30.6617	2.6803	245.125	8.57751	4.72465	9.61248	28.3715		1.05943	66.3359	4.52221	26.2761	0.0733301
Set608	38.5003	33.4449	24.2137	34.6749		21.4978	21.9763	33.1195	0.982369	3.43016	8.07451	16.9885	3.69928	178.796	7.71052	0.616071	17.8797		11.6778			9.46655		0.213599	5.9569	1.4506	2.4026	16.8122	1.26566	0.0351795		71.9155	408.271	24.5768	3.64917	5.9043	30.6617	2.6803	115.109	10.0265	7.79652	7.44762	6.53812		0.657648	53.5555	5.69468	46.0807	0.0733301
Set609	45.2487	6.43539	35.5613	19.9357		30.123	22.6611	30.5318	1.02615	2.76867	8.46268	16.729	1.17614	274.803	6.49766	0.616071	8.99574		12.7694		394.928	7.11904		0.208484	5.2887	0.92433	4.48387	18.3379	1.93274	0.0251246		69.1586	1789.52	23.0654	3.99359	7.14109	56.8627	2.6803	115.109	7.79658	5.78013	8.58981	31.7851		1.80375	35.3216	3.32539	83.0284	0.0870369
Set610	35.174	6.43539	49.5943	14.7018		23.9359	22.6611	33.1195	0.942191	5.43159	7.49444	16.2568	3.69928	221.206	11.0779	0.616071	14.1954		4.33957			7.78599		0.25409	3.21069	1.18812	2.4026	34.0688	2.34467	0.0402038		69.1586		21.0022	3.64917	8.16582	25.652	2.6803		7.79658	5.78629	7.47142	6.53812		0.408836	19.9756	7.19645	108.909	0.0844382
Set611	41.5916	26.9198	42.1113	14.7018		26.2264	27.3253	34.0896	0.982369	3.43016	7.59344	16.6425	1.17614	267.18	8.36604	0.395367	14.2625		2.76687			7.11904		0.208484	6.42234	1.15737	4.17741	41.0638	2.36562	0.0402038	147.759	220.36		28.2983	4.4242	11.364	30.6617	2.6803	115.109	8.8037	5.78013	8.58981	41.4194		0.408836	43.1557	2.88527	38.5825	0.12527
Set612	35.174	20.3646	21.7895	36.7325		21.4978	25.1042	34.0896	0.980235	3.43016	7.39543	16.6425	1.17614	69.3526	6.72864	0.756352	10.1951		10.2107			7.11904	37.8822	0.294582	5.83287	0.748717	2.4026	16.8122	2.28896	0.045656		69.1586		17.702	3.69494	5.9043	48.1872	2.6803	53.7439	7.65687	5.80275	8.58981	26.1098		0.817671	19.9756	2.88527	93.9337	0.0733301
Set613	36.8207	6.43539	31.5962	18.2062		24.5217	23.9896	33.841	0.784323	3.43016	8.07451	16.2568	1.17614	69.3526	6.14125	0.616071	14.2625		10.2107			7.11904	36.1001	0.343061	9.89442	1.18812	2.4026	18.4641	1.26566	0.0251246	147.759	212.423		28.2983	3.70794	10.1136	29.2963	2.68945	89.2895	11.0926	5.79144	8.43289	8.21714		0.817671	70.6365	5.69468	26.2761	0.0733301
Set614	44.6829	20.3646	20.709	18.2062		22.0102	22.8327	34.0896	0.863257	4.78571	7.39543	7.63173	1.49295	173.678	6.14125	0.537117	14.1954		12.7504		79.0718	7.11904	37.8822	0.294582	8.96992	0.748717	4.17741	16.0376	1.26566	0.0453523		212.423		17.8968	3.70794	7.14109	29.2963	2.6803	53.7439	8.8037	5.78013	6.976	26.1098		1.53865	19.9756	5.69468	76.0162	0.0840325
Set615	251.958		48.5531	35.0315		26.3399	25.1042	28.024	0.977652	3.43016	8.36884	16.9885	4.63705	69.3526	6.14125	0.50709	14.1954		2.76687		46.7608	11.4805	37.8822	0.208484	9.89442	0.748717	4.48387	23.8984	2.60502	0.0251246	211.245	69.1586		17.757	4.97924	5.9043	30.6617	2.6803	53.7439	11.7677	7.79652	10.254	26.1098		0.408836	19.9756	4.92448	38.5825	0.0733301
Set616	38.5003	28.7192	21.7895	34.968		23.165	26.0828	29.282	0.942191	4.7652	8.09569	16.9885	4.80438	69.3526	7.33111	0.616071	17.1811		7.22234	325.79	84.6622	7.11904		0.230555	6.42234	1.15737	4.0084	23.8984	1.26566	0.0543341		69.1586		17.8968	3.81162	7.29413	30.6617	2.70553	115.109	8.57751	5.78013	9.02068	26.1098		0.408836	19.9756	4.52221	81.7814	0.0791169
Set617	275.957		25.938	18.2062		11.973	22.6611	32.7659	1.07547	3.72627	8.07451	7.63173	1.19983	173.678	11.0779	0.686211	12.3961		10.7588		266.343	7.78599	37.8822	0.213599	8.68369	1.15737	4.33288	16.8122	1.26566	0.0251246	211.245	69.1586	408.271	26.395	3.28053	2.01107	25.652	2.70553		7.79658	5.80275	8.43289	31.576		1.80375	14.4007	7.95271	26.2761	0.108379
Set618	38.5003	20.3646	39.2562	14.7018		26.2264	22.8327	25.4157	1.07547	3.43016	7.59344	26.8945	1.17614	69.3526	7.21268	0.398109	5.03823		2.69315		266.343	9.01195		0.427333	5.83287	1.15737	4.48387	16.0376	1.26566	0.0251246		70.91	1789.52	26.395	4.4242	9.75247	58.5222	2.68945	98.0799	7.87746	5.78013	10.8707	26.1098		0.408836	21.8759	5.95275	31.0842	0.133966
Set619	44.6829	6.43539	48.5531	31.9698		29.6819	20.7764	29.282	0.977652	6.30434	6.97391	7.63173	1.19983	69.3526	7.92492	0.756352	5.03823		2.61943		46.7608	9.28374		0.213599	5.83287	1.3919	4.17741	45.0385	1.00072	0.0251246		171.69	1190.86	23.0654	3.84608	9.18751	29.2963	2.6803	53.7439	7.95833	5.78013	9.61248	31.576		0.408836	17.732	3.32539	38.5825	0.0895017
Set620	35.174	20.3646	31.5962	14.7018		24.3853	20.7764	29.282	1.18961	3.72627	5.94134	16.6425	5.58206	69.3526	5.30405	0.395367	10.1951		2.69315		266.343	7.11904	39.3233	0.954426	5.83287	0.748717	2.4026	16.0376	1.28637	0.0433572	147.759	254.275		17.702	3.99359	2.01107	30.6617	5.60466	115.109	7.79658	5.51173	8.43289	8.21714		0.408836	21.8759	4.53049	88.2577	0.0737956
Set621	48.2912	20.3646	47.6799	39.1494		21.4978	22.8327	46.0037	0.850156	3.43016	7.42665	16.6425	4.74873	182.853	8.28076	0.398109	5.03823		9.50883		79.0718	7.11904		0.208484	5.2887	0.748717	4.48387	16.8122	2.42025	0.0435683		70.0343	408.271	23.3304	3.64917	9.98623	29.2963	2.6803	177.672	7.77747	5.78013	13.311	36.8886		0.657648	62.6281	3.32539	38.5825	0.0733301
Set622	41.5916		39.2562	31.2074		28.9467	28.4046	48.3083	1.02615	5.38904	7.49444	16.9885	1.50086	245.804	6.49766	0.616071	8.99574	10.7767	9.50883		46.7608	7.78599	36.1001	0.208484	6.42234	0.91908	6.82496	48.3748	1.26566	0.0251246		71.9155	408.271	34.1742	4.03662	7.14109	26.7772	2.6803	80.9232	2.95501	6.3335	7.45952	8.21714		0.817671	53.5555	2.88527	108.322	0.0844382
Set623		6.43539	21.7895	14.7018		28.7905	18.7967	32.6782	0.977652	2.76867	7.51004	16.6425	1.23708	182.853	6.49766	0.50709	10.1951		8.85429			9.55932		0.294582	5.83287	1.15737	4.0084	16.8122	2.311	0.0251246		70.91	1789.52	17.757	3.81162	5.9043	31.0441	4.23061	53.7439	7.95833	5.78013	10.8707	8.21714		0.817671	40.4402	4.92448	75.305	0.0733301
Set624		20.3646	48.1469	18.2062		26.3399	20.7764	33.841	0.977652	3.43016	7.73497	7.63173	1.19983	173.678	6.02126	0.616071	10.1951		10.2107		79.0718	10.8238		0.230555	9.40025	1.15737	20.3923	68.5938	1.26566	0.0453523		250.664	1789.52	26.395	3.64917	5.9043	29.2963	2.70553	115.109	7.95833	7.16038	7.66865	6.53812		2.02031	14.4007	4.92448	38.5825	0.0733301
Set625		31.6652	48.1469	18.2062		21.9528	18.7967	29.282	0.977652	3.43016	7.42665	17.9295	5.60193	69.3526	7.92492	0.477056	5.03823	10.7767	10.2107		266.343	9.46655	37.8822	0.213599	8.91897	0.748717	4.0084	32.291	2.54361	0.0302683		338.161		23.3304	3.70794	7.14109	88.149	4.23061	179.624	7.65687	5.79144	8.43289	6.53812		0.408836	19.9756	5.69468	38.5825	0.0844382
Set626		33.2798	21.7895	33.7172		23.5144	20.7764	32.3979	0.977652	5.54631	7.46054	7.63173	3.69928	183.383	9.64394	0.477056	12.3961		2.76687		84.6622	10.7171	37.8822	0.208484	8.62603	0.605806	5.08365	15.0673	2.54361	0.0351795		212.423		24.5768	3.99359	7.14109	66.6309	2.6803	115.109	11.0926	5.78629	11.9094	22.0189		1.82755	17.732	7.95271	88.2577	0.0844382
Set627	66.5475	20.3646	24.2137	19.9357		25.2309	20.7764	33.2478	0.942191	4.7652	7.46054	7.63173	1.17614	55.853	10.4495	0.50709	14.2625		2.76687		79.0718	7.11904	36.1001	0.213599	5.9569	1.15737	2.4026	23.8984	2.28896	0.0417842	147.759	78.1269		28.2983	5.21549	5.9043	29.2963	2.72223	53.7439	12.1411	5.63981	7.0537	26.1098		0.408836	19.9756	3.32539	26.2761	0.0844382
Set628	48.2912	33.4449	21.7895	18.2062		23.9359	23.7044	33.841	1.10047	5.05436	7.42665	15.897	2.1769	69.3526	10.4495	0.46671	10.1951		2.76687		266.343	7.78599		0.505343	5.83287	0.748717	4.0084	64.4429	1.26566	0.0671363		69.1586		17.702	3.70794	5.9043	26.7772	5.17367	249.277	7.77747	5.63981	5.10641	40.5495		1.71384	19.9756	2.88527	26.2761	0.0733301
Set629	46.3685	20.3646	39.638	14.7018		25.2309	25.1042	28.024	1.01063	3.72627	7.49444	16.729	1.29945	55.853	8.28076	0.756352	16.7948		2.61943		84.6622	10.8238		0.208484	8.68369	1.15737	5.18696	34.0688	1.26566	0.0351795		171.69		24.5768	3.64917	7.14109	31.0441	2.72223	53.7439	8.08753	5.80275	7.45952	31.576		0.657648	43.1557	5.46381	46.0807	0.0733301
Set630	43.98	6.43539	21.7895	14.7018		30.123	21.9763	29.282	1.01846	3.43016	7.49444	17.9295	7.72021	119.353	6.14125	0.756352	10.1951	10.7767	4.33957	279.021		9.01195	37.8822	0.213599	6.42234	1.18812	4.17741	66.052	1.26566	0.0251246		69.1586	408.271	27.6849	3.70794	2.01107	47.7278	4.33844	282.847	9.37473	5.78013	10.0723	41.0581		0.646661	17.732	4.52221	26.2761	0.0882693
Set631	41.5916		57.0274	18.2062		31.2151	18.7967	49.045	0.977652	5.22704	7.78447	7.63173	3.69928	173.678	8.36604	0.537117	12.3961		14.1385		79.0718	10.7319		0.213599	6.42234	0.748717	2.4026	27.3477	2.5686	0.0402038	211.245	69.1586	1190.86	24.5768	4.02358	7.29413	31.0441	5.42564	231.932	7.79658	5.80275	10.0723	40.4652		0.657648	14.4007	11.1869	26.2761	0.0733301
Set632	39.9284	6.43539	51.6096	14.7018		23.2586	21.9763	59.9779	0.784323	3.43016	8.07451	7.63173	1.17614	173.678	8.28076	0.46671	14.2625	10.7767	10.7588	279.021		7.78599		0.343061	6.42234	0.748717	4.0084	15.0673	2.41969	0.0417842	147.759	71.9155	408.271	17.702	3.70794	2.01107	30.6617	2.6803		7.79658	4.72465	7.47142	22.0189		0.408836	43.8292	2.88527	46.0807	0.0844382
Set633	275.957	25.0538	30.8685	18.2062		27.7396	20.5575	31.9261	0.980235	6.76173	7.46054	12.3101	1.19983	183.913	7.21268	0.46671	19.0347	10.7767	4.17057		79.0718	7.11904	37.8822	0.208484	3.21069	1.18812	4.17741	18.3379	2.42025	0.0402038		171.69	408.271	26.395	3.28053	7.32979	31.0441	3.55941	115.109	7.65687	5.78013	10.254	31.576		0.817671	19.9756	5.00636	108.322	0.0870369
Set634	38.5003	38.6049	30.8685	18.2062		26.3399	20.7764	32.3979	0.850156	4.78571	7.39543	16.2568	1.50086	221.206	7.71052	0.398109	18.6115		4.33957		266.343	7.78599		0.230555	5.83287	1.15737	5.61221	46.2461	2.55123	0.0417842		164.731	408.271	31.0811	3.81162	2.01107	29.2963	2.68945	181.018	7.79658	5.80275	6.976	36.8886		0.657648	62.6281	5.00636	38.5825	0.0733301
Set635	38.5003	28.6497	47.6799	18.2062		26.3399	22.8327	29.282	0.927279	2.76867	7.51004	18.336		183.913	10.9182	0.398109	5.03823	10.7767	2.76687		266.343	7.78599	36.1001	0.213599	3.21069	1.58113	4.0084	16.8122	2.54951	0.045656		69.1586		21.0022	3.70794	2.01107	29.2963	2.70553	231.932	11.2189	5.78013	7.44762	31.576		0.657648	19.9756	4.52221	31.0842	0.0733301
Set636	35.174	20.3646	31.3097	31.2074		21.9528	20.7764	31.2195	0.784323	4.43494	7.59344	16.2568	4.80438	69.3526	8.54958	1.01092	10.1951		2.76687			7.11904		0.208484	10.5534	1.18812	4.17741	43.9437	1.26566	0.0467243		69.1586		17.702	4.68606	7.29413	56.8627	2.6803	53.7439	8.8037	6.3335	7.45952	27.6427		0.817671	17.732	4.92448	26.2761	0.0733301
Set637	35.174	6.43539	48.5531	30.1919		24.5801	25.1042	49.1357	0.942191	3.43016	7.49444	16.2568	5.56411	69.3526	10.9182	0.46671	10.1951		2.76687		46.7608	7.11904	36.1001	0.208484	5.83287	0.92433	4.33288	64.4429	1.26566	0.045656	211.245	220.36		17.8968	3.64917	2.01107	26.7772	2.68945	115.109	7.79658	5.63981	10.254	41.0581		0.817671	14.4007	5.46381	26.2761	0.0844382
Set638	38.5003	75.1832	39.2562	14.7018		24.5801	23.7044	22.9363	0.784323	3.43016	8.07451	23.7059	1.17614	182.853	3.99419	0.756352	8.99574		8.85429		79.0718	10.7319	37.8822	0.208484	8.91495	0.748717	2.4026	44.1707	2.54775	0.0453523		70.0343		28.2983	3.99359	10.1136	30.6617	5.56536	53.7439	7.72673	5.78013	7.44762	26.1098		0.408836	40.4402	3.32539		0.0733301
Set639	48.2912	28.6497	54.2987	18.2062		26.2264	21.9763	34.0896	0.549093	3.86287	7.59344	12.3101	1.19983	119.883	8.28076	0.616071	10.1951		2.76687	279.021	79.0718	9.46655		0.208484	5.2887	0.748717	4.48387	16.0376	2.34467	0.0402038		70.0343		21.0022	3.70794	7.29413	62.3633	2.6803	53.7439	9.44459	5.63981	9.02068	8.21714		0.408836	40.4402	2.88527	88.2577	0.0844382
Set640	48.2912	33.2798	35.5613	14.7018		23.9359	21.9763	46.0037	0.850156	3.43016	5.35881	16.6425	1.23708	182.853	7.92492	0.46671	5.03823		11.6778	279.021		11.2064	39.3233	0.208484	3.21069	0.92433	4.81939	43.9437	1.26566	0.0638849	147.759		1190.86	23.3304	3.64917	2.01107	48.1872	3.81476		7.95833	5.51173	10.0723	8.21714		1.57553	21.8759	4.92448	52.2467	0.0733301
Set641	43.98	6.43539	31.5962	14.7018		21.4978	22.8327	54.0955	0.980235	3.43016	5.21587	7.63173		55.853	7.21268	0.398109	5.03823		8.09591			9.23925		0.208484	3.21069	0.748717	4.33288	16.0376	2.41969	0.0351795		70.91	1190.86	21.0022	3.99359	6.9524	48.1872	3.55941	176.809	7.72673	5.78013	10.8707	31.7851		0.657648	19.9756	4.40396	46.0807	0.0844382
Set642	113.855	6.43539	61.3552	30.1332		26.3399	21.9763	28.024	0.977652	5.50261	7.49444	12.3101	1.17614	178.796	7.71052	0.477056	5.03823		2.76687		394.928	7.11904	39.3233	1.2163	5.83287	0.953044	5.61221	27.3477	2.42025	0.0302683		70.91		22.7586	3.75932	7.32979	80.9243	4.23061	115.109	12.1411	5.63981	11.3894	6.53812		0.408836	40.4402	3.32539	38.5825	0.0733301
Set643	275.957	6.43539	31.3097	19.9357		24.2355	18.7967	38.4968	0.784323	5.38904	5.21587	12.3101	1.19983	178.796	5.1065	0.50709	18.6347		10.7588		46.7608	9.55932	37.8822	0.208484	5.9569	0.92433	4.17741	23.8984	1.26566	0.0543341	147.759	70.91		22.7586	3.64917	6.9524	29.2963	3.91301	53.7439	7.79658	5.63981	6.976	28.3715		1.71384	43.1557	2.88527	58.0988	0.0844382
Set644	35.174	28.6497	31.5962	14.7018		26.2264	20.7764	29.282	0.980235	6.30434	7.59344	12.3101	1.19983	178.796	7.78936	0.398109	5.03823	10.7767	12.7504			9.55932	36.1001	1.42772	3.21069	0.748717	4.17741	16.0376	2.311	0.0351795	221.347	70.0343	1190.86	23.3304	3.84608	2.01107	26.7772	2.70553	53.7439	7.95833	6.53499	6.976	6.53812		0.657648	19.9756	7.19645	26.2761	0.0733301
Set645	61.1881	6.43539	31.5962	29.6301		22.9963	21.9763	34.0896	0.942191	3.43016	8.2461	12.3101	1.19983	178.796	6.72864	0.537117	17.7969		7.22234	279.021		7.78599	36.1001	0.213599	6.42234	0.92433	4.17741	34.0688	1.28637	0.0402038		70.91		31.0372	4.89824	2.01107	73.1548	4.23061	53.7439	7.66008	5.51173	6.976	6.53812		0.817671	14.4007	4.53049	93.9337	0.0858704
Set646	38.5003	37.9099	56.0511	31.2074		26.2092	21.9763	37.0138	0.850156	5.22704	7.49444	12.3101	1.17614	178.796	7.71052	0.986632	5.03823		8.85429	279.021	46.7608	9.55932	37.8822	0.230555	3.21069	1.15737	4.17741	16.0376	2.54361	0.0251246	147.759	250.664		23.3304	2.05776	7.32979	29.2963	2.72223	222.838	7.65687	5.51173	7.47142	31.576		0.408836	14.4007	4.40396	38.5825	0.0844382
Set647	35.174	6.43539	21.7895	30.1332		23.9359	23.7044	75.8505	0.980235	5.22704	8.09569	7.63173	1.29945	311.264	6.02126	0.616071	10.1951		10.7588		46.7608	7.78599		0.360774	5.83287	1.63148	4.17741	44.1707	1.26566	0.0351795	221.347	71.9155		28.2983	3.64917	7.14109	29.2963	2.6803	282.847	7.65687	5.78629	6.976	31.576		0.817671	62.6281	4.52221	58.0988	0.0639706
Set648	57.7998	6.43539	48.1469	30.2121		26.2264	20.7764	32.3979	1.158	5.22704	7.26395	16.6425	4.84602	221.206	6.2446	0.537117	16.9108		10.2107			9.23735	37.8822	0.213599	5.83287	0.92433	4.48387	16.8122	1.28637	0.064592		69.1586	408.271	22.7586	3.64917	2.01107	66.6309	2.6803	188.202	7.79658	5.78013	11.9094	31.576		1.05943	70.6365	7.19645	31.0842	0.0870369
Set649	161.163		66.0908	36.7476		26.2264	22.8327	44.9554	0.980235	3.43016	7.42609	16.729	1.49295	253.726	7.71052	0.398109	14.1954		2.69315			9.46655		0.208484	3.21069	0.748717	4.48387	45.0385	1.83219	0.0402038		220.36		17.8968	4.27732	11.2183	48.1872	2.6803	115.109	7.95833	7.79652	10.0723	26.1098		0.817671	62.6281	9.21028	58.4128	0.0733301
Set650	48.2912	6.43539	25.938	29.9947		21.9528	18.7967	28.024	0.980235	3.57822	6.92441	16.729	1.17614	182.853	7.41867	0.537117	18.7971		4.17057		46.7608	9.51294	37.8822	0.213599	5.83287	1.58113	2.4026	16.8122	2.55123	0.0302683	147.759	71.9155	1190.86	26.395	3.84608	10.3488	31.0441	3.55941	53.7439	7.79658	6.3335	9.61248	6.53812		0.408836	68.3469	2.88527	26.2761	0.0870369
Set651	38.3828	34.6806	48.5531	26.592		21.4978	21.9763	34.0896	0.942191	5.54631	7.49444	12.3101	1.19983	126.633	5.30405	0.477056	16.7948	10.7767	2.76687	300.113		9.46655		0.208484	3.21069	1.15737	2.4026	23.8984	1.26566	0.0523979		212.423	408.271	22.7586	4.06172	9.66449	56.8627	2.6803	115.109	11.7677	6.10755	7.47142	28.3715		0.408836	68.3469	4.40396	26.2761	0.0733301
Set652		20.3646	31.3097	30.1332		21.4978	23.7044	49.7816	0.980235	4.79185	6.92441	7.63173	1.23708	274.803	3.40529	0.616071	14.1954		10.2107			7.11904	37.8822	0.294582	8.68369	0.748717	4.17741	16.8122	2.48165	0.0417842	221.347	220.36		31.0811	3.64917	2.01107	29.2963	4.23061	53.7439	7.87746	5.79144	8.58981	8.21714		1.32948	62.6281	2.88527	26.2761	0.0733301
Set653	45.8086	38.6049	31.3097	36.7476		26.3399	20.7764	35.2762	0.863257	3.72627	7.39543	16.2568	1.50086	69.3526	6.02126	0.395367	10.1951	10.7767	4.33957	342.514		7.78599	39.3233	0.343061	8.68369	1.8775	4.33288	16.8122	2.36562	0.0351795	221.347	69.1586	408.271	22.7586	3.70794	10.1136	29.2963	5.08892	53.7439	7.79658	5.51173	7.0537	31.7851		0.657648	14.4007	5.69468	26.2761	0.0733301
Set654	41.5916	28.7192	31.3097	14.7018		26.2264	23.9896	28.024	0.863257	1.4214	5.21587	7.63173	3.69928	253.726	7.21268	0.395367	12.3961		9.43942		79.0718	7.11904		0.208484	8.85246	1.18812	4.81939	23.8984	1.26566	0.0302683	147.759	70.0343		23.3304	4.51622	6.9524	25.652	2.70553	115.109	7.79658	5.80275	7.47142	31.7851		0.408836	14.4007	4.52221	73.1132	0.08697
Set655	36.8207	20.3646	20.709	30.1919		26.2264	21.9763	33.1195	1.07547	3.43016	7.59344	15.897	1.23708	263.989	6.95962	0.756352	10.1951		2.76687		46.7608	7.78599		0.208484	5.83287	1.79114	4.0084	23.8984	1.26566	0.0351795	147.759	69.1586	408.271	17.757	3.64917	6.9524	29.2963	5.73862	53.7439	7.4674	5.80275	6.976	22.0189		1.93322	21.8759	4.92448	81.7814	0.0864537
Set656	113.855		21.7895	30.2121		23.5144	26.5188	38.4968	0.977652	5.22704	7.59344	16.6425	2.1769	245.804	7.21268	0.477056	12.3961		2.76687		266.343	7.78599	36.1001	0.208484	8.98037	0.953044	4.17741	15.0673	1.26566	0.064592		220.36		29.6678	3.28053	7.29413	26.7772	2.6803		10.0265	5.78013	8.43289	8.21714		1.93322	71.6355	6.80712	58.0988	0.0810281
Set657	47.3299	28.6497	32.1292	18.2062		23.5144	21.9763	49.7816	0.850156	3.43016	7.49444	16.729	1.73818	69.3526	6.72864	1.01092	5.03823		2.76687	279.021		7.78599	36.1001	0.213599	3.21069	0.953044	4.48387	16.0376	1.84295	0.0351795		70.91	1190.86	28.2054	3.84608	8.16582	31.0441	3.81476	53.7439	7.79658	5.78013	8.58981	31.7851		0.817671	14.4007	3.32539	48.4976	0.109511
Set658	44.6829		64.0427	31.2074		21.9528	25.1042	31.2195	0.784323	3.43016	7.49444	18.336	5.56411	250.035	8.36604	0.616071	14.1954		4.17057			7.78599		0.343061	9.61854	1.15737	6.82496	23.8984	2.42025	0.0351795	147.759	212.423	1190.86	17.757	3.70794	7.14109	30.6617	5.73862	115.109	7.95833	5.63981	7.45952	27.6427		0.817671	62.6281	4.52221	26.2761	0.0844382
Set659	37.8389	28.6497	30.8685	14.7018		26.2264	22.6611	50.0701	0.977652	3.86287	10.4651	7.63173	5.83615	69.3526	7.21268	0.616071	12.3961		2.76687		394.928	7.11904	36.1001	0.208484	7.20538	0.953044	5.75339	41.0638	2.311	0.0351795	147.759	250.664	1789.52	31.3008	3.81162	8.16582	25.652	2.6803	53.7439	8.91785	5.63981	6.976	31.7851		1.6712	19.9756	3.32539	46.0807	0.0733301
Set660	36.8207	6.43539	31.3097	36.7476		26.3399	24.7586	34.0896	1.02615	4.78571	7.42665	7.63173	1.17614	173.678	7.71052	0.477056	18.6347	10.7767	11.6778	279.021		9.55932		0.213599	8.91495	0.748717	4.66134	45.0385	2.5686	0.0302683		220.36		31.0372	4.27732	2.01107	29.2963	2.6803	233.102	7.87746	5.78013	10.0723	6.53812		0.817671	19.9756	5.46381	93.9337	0.0870369
Set661	36.8372	28.6497	28.1715	31.2074		22.9963	21.9763	39.1416	0.942191	5.22704	6.45339	12.3101	1.17614	178.796	6.95962	0.477056	10.1951	10.7767	2.76687	279.021		7.11904	36.1001	0.25409	3.21069	1.15737	4.0084	16.0376	1.72338	0.0251246	147.759	212.423	1190.86	21.0022	4.06172	2.01107	25.652	5.55785	53.7439	7.44635	5.80275	5.10641	8.21714		0.408836	62.6281	4.40396	38.5825	0.0858704
Set662	45.2487	6.43539	31.3097	14.7018		21.4978	22.6611	38.4968	1.02615	5.38904	7.49444	16.6425	1.50086	119.353	9.64394	0.616071	14.1954		7.76814		46.7608	7.11904	36.1001	0.213599	8.98037	0.748717	4.0084	18.3379	1.26566	0.0385853	221.347	69.1586	1789.52	23.3304	4.03662	7.14109	26.7772	2.6803	186.621	7.95833	5.79144	7.44762	26.1098		0.408836	66.3359	3.32539	48.4976	0.109511
Set663	35.174		21.7895	14.7018		26.7417	23.7044	34.0896	0.863257	3.43016	8.07451	7.63173	1.19983	173.678	8.28076	0.616071	18.6882		19.3185			9.46655		0.360774	5.83287	0.92433	4.0084	23.8984	1.28637	0.0402038		70.91	1789.52	30.5607	3.99359	2.01107	31.0441	2.6803	179.624	8.8037	5.78013	5.10641	31.576		1.97862	66.3359	4.92448	38.5825	0.0844382
Set664	41.5916	6.43539	45.529	31.2074		26.3399	28.1464	28.024	1.12236	3.72627	4.38824	16.2568	1.50086	55.853	8.28076	0.398109	14.2625		8.09591			7.11904		0.213599	3.21069	1.15737	4.48387	16.8122	1.26566	0.0251246		69.1586		29.2034	3.84608	13.0607	26.7772	2.6803	53.7439	11.7677	5.78013	6.976	26.1098		1.53865	19.9756	3.32539	52.2467	0.0870369
Set665	41.5916	20.3646	48.5531	14.7018		30.123	21.9763	39.1416	0.980235	3.72627	7.42665	16.9885	1.23708	69.3526	14.1719	0.616071	5.03823		2.76687	279.021	46.7608	10.7319		0.359521	8.62603	1.05622	5.18696	16.8122	2.42025	0.0302683	147.759	69.1586		21.0022	3.81162	9.66449	29.2963	4.2666	115.109	11.8283	5.79144	8.58981	8.21714		0.657648	19.9756	4.40396	58.4128	0.0844382
Set666	36.8372	6.43539	20.709	14.7018		26.2264	21.9763	45.4193	0.942191	3.72627	7.39543	16.2568	1.49295	183.913	7.78936	0.537117	10.1951		8.85429			10.8238	36.1001	0.208484	5.83287	0.748717	4.98034	23.8984	2.23818	0.0351795	221.347	69.1586	1190.86	29.9824	3.28053	6.9524	29.2963	2.68945	231.932	7.87746	5.79144	10.8707	22.0189		1.32948	43.1557	2.88527	26.2761	0.0733301
Set667	45.2487	28.6497	52.6713	14.7018		26.2264	21.9763	26.974	0.980235	4.2591	8.0618	16.2568	1.23708	69.3526	6.72864	0.477056	5.03823		9.81631	300.113	46.7608	7.11904	36.1001	0.230555	6.42234	1.39249	4.0084	15.0673	2.42025	0.0402038		69.1586		23.3304	3.99359	6.9524	29.2963	2.6803	53.7439	7.79658	5.78013	7.0537	6.53812		0.408836	66.3359	2.88527	38.5825	0.0733301
Set668	171.633		26.4191	14.7018		12.6016	22.8327	34.0896	0.977652	3.72627	6.92441	16.9885	1.17614	173.678	6.49766	0.537117	14.2625		2.61943		84.6622	7.78599	36.1001	0.343061	3.21069	1.58113	4.17741	16.0376	2.42025	0.0351795	221.347	70.0343		22.7586	3.64917	6.9524	30.6617	2.68945	53.7439	8.57751	4.72465	8.43289	6.53812		1.93322	44.1059	5.69468	38.5825	0.0733301
Set669	38.5003		21.7895	30.2121		23.5144	26.9531	26.974	0.942191	5.49408	7.42665	12.3101	1.19983	69.3526	8.19097	0.74285	18.4729		2.76687	300.113		10.7319		0.294582	8.81237	0.748717	5.79787	23.8984	2.65741	0.064592		171.69	408.271	22.7586	3.99359	2.01107	30.6617	5.56536	231.932	9.44459	5.78013	8.58981	26.1098		0.408836	17.732	2.88527	38.5825	0.0864537
Set670		28.6497	26.4191	18.2062		26.2264	21.9763	29.282	0.977652	6.06092	7.83397	16.9885	5.60193	183.913	6.14125	0.616071	5.03823		10.7588		46.7608	14.5097	37.8822	0.208484	5.83287	0.748717	4.48387	16.7657	1.26566	0.0251246		269.925	1789.52	23.0654	3.28053	7.14109	29.2963	5.56536	189.435	7.87746	5.78013	10.254	8.21714		0.408836	14.4007	5.00636	26.2761	0.0733301
Set671	41.5916	28.7192	31.3097	29.9426		26.3399	21.9763	49.1357	0.977652	3.43016	7.59344	16.2568		55.853	10.4495	0.756352	14.2625		7.22234	342.514	79.0718	7.11904	37.8822	0.208484	6.42234	0.748717	4.66134	15.0673	2.34467	0.0467243		212.423		31.0372	3.81162	2.01107	31.0441	5.08892	53.7439	7.66008	5.63981	8.43289	6.53812		0.408836	19.9756	4.40396	38.5825	0.0878502
Set672		28.6497	31.3097	18.2062		26.2264	21.9763	34.0896	0.863257	4.78571	9.28229	15.897	7.51998	183.913	8.60957	0.395367	10.1951		2.76687			9.46655		0.427333	3.21069	1.18812	4.48387	16.0376	2.311	0.0251246				28.506	3.77153	7.32979	73.1548	2.72223	233.102	8.57751	5.78013	10.3087	6.53812		1.75544	66.3359	13.1635	75.305	0.0639706
Set673		28.6497	25.3164	18.2062		29.6819	20.7764	33.1195	0.977652	4.70088	8.98767	12.3101	1.19983	69.3526	7.21268	0.616071	14.1954		10.2107	300.113		10.3341	36.1001	0.807022	8.91495	0.748717	4.33288		2.42025	0.0402038		69.1586	1789.52	22.7586	3.81162	6.9524	66.6309	3.77702	53.7439	11.0926	5.80275	13.0974	31.576		1.57553	62.6281	4.52221	83.0284	0.0791169
Set674	48.2912	28.6497	30.8685	34.968		32.5106	20.7764	46.0037	0.850156	4.08588	7.51004	16.2568	1.49295	245.804	6.14125	0.686211	5.03823		2.76687		46.7608	11.1001	36.1001	0.294582	3.21069	1.15737	4.48387	16.0376	2.23818	0.045656		70.91	1190.86	21.0022	3.81162	7.29413	26.7772	4.96656		7.95833	5.78013	9.02068	8.21714		0.408836	21.8759	2.88527	38.5825	0.0733301
Set675	45.8086	28.6497	21.7895	14.7018		26.2264	21.9763	33.1195	0.980235	4.78571	7.42665	17.2964	1.49295	182.853	9.64394	0.756352	19.7771		2.76687			10.8561		0.230555	3.21069	0.748717	2.4026	15.0673	2.36562	0.0351795		69.1586	408.271	21.0022	3.81162	9.66449	25.652	2.68945	226.99	8.91785	5.78013	10.4431	8.21714		1.97223	62.6281	2.88527	93.9337	0.0844382
Set676	35.174	20.3646	53.6595	14.7018		26.3399	20.7764	32.3979	0.980235	4.7652	7.49444	7.63173	4.76275	173.678	7.71052	0.398109	10.1951	10.7767	4.17057	300.113	46.7608	9.51294	36.1001	0.25409	5.83287	1.15737	4.17741	18.3379	1.28637	0.0507678	221.347	69.1586		17.8968	3.84608	9.41665	98.4406	2.6803	53.7439	8.91785	5.51173	7.47142	27.6427		1.32948	62.6281	4.40396	31.0842	0.0733301
Set677	124.325	36.4746	50.4849	18.2062		26.3399	21.9763	33.841	0.863257	2.76867	9.06921	12.3101	1.19983	119.883	8.60957	0.403903	16.9057	10.7767	2.76687	279.021	266.343	10.7319		0.208484	3.21069	1.15737	4.48387	43.9437	1.26566	0.0402038	147.759	212.423	1190.86	25.1286	3.70794	6.9524	66.6309	4.23061	231.932	8.57751	4.72465	8.43289	27.6427		0.657648	62.6281	4.40396	76.0162	0.0858704
Set678	36.8372	6.43539	21.7895	30.1919		26.2264	21.9763	49.7816	0.784323	3.43016	8.07451	16.9885	1.17614	183.913	6.14125	0.477056	10.1951		10.7588		79.0718	7.11904	36.1001	0.230555	3.21069	1.18812	2.4026	10.7516	2.613	0.0351795		212.423		17.757	3.70794	2.01107	30.6617	3.55941	53.7439	7.87746	5.78013	7.45952	8.21714		0.408836	14.4007	2.88527	88.2577	0.0844382
Set679			21.7895	18.2062		26.2264	22.8327	33.1195	0.942191	3.43016	7.49444	7.63173	1.17614	182.853	3.99419	0.477056	10.1951		4.33957			7.11904		0.230555	5.2887	1.40399	4.0084	16.0376	2.28896	0.0565236		164.731		17.757	3.70794	7.32979	29.2963	3.39892	189.435	7.87746	5.78013	7.47142	27.6427		0.408836	14.4007	5.69468	88.2577	0.0733301
Set680	38.5003	26.9198	21.7895	14.7018		23.9359	22.8749	33.841	0.927279	5.22704	8.1603	15.897	4.74873	253.726	8.28076	0.756352	8.99574		2.76687			9.55932		0.294582	5.83287	1.31343	6.19412	15.0673	1.26566	0.0251246				26.395	3.70794	2.01107	30.6617	4.96656	115.109	8.9603	5.78013	8.58981	41.1651		1.77948	14.4007	4.40396	26.2761	0.0844382
Set681	35.174	6.43539	48.5531	18.2062		21.4978	20.7764	31.9261	1.02615	4.70088	5.89184	17.2964	1.49295	69.3526	10.9182	0.46671	18.6115		8.85429	279.021	79.0718	7.78599	36.1001	0.208484	6.42234	0.953044	4.17741	46.3875	1.26566	0.045656		69.1586		24.5768	3.64917	5.9043	29.2963	3.39892	188.202	7.79658	5.63981	7.47142	6.53812		1.6712	14.4007	4.52221	26.2761	0.0767362
Set682		20.3646	47.6799	18.2062		21.9528	21.9763	38.4968	0.980235	4.70088	7.39543	12.3101	1.17614	69.3526	7.71052	0.477056	10.1951		7.22234	300.113	46.7608	7.11904		0.211041	5.83287	1.15737	5.4126	15.0673	1.00072	0.0351795	221.347	220.36		27.5875	3.75932	10.1136	26.7772	2.6803	53.7439	7.66008	6.3335	8.58981	31.7851		1.57553	14.4007	5.46381	46.0807	0.0733301
Set683		6.43539	48.9698	37.4401		26.2264	21.9763	33.841	1.02615	4.78571	6.92441	16.2568	9.87632	69.3526	11.0779	0.398109	5.03823	10.7767	2.76687	279.021		9.23735		0.213599	3.21069	1.33438	2.4026	16.0376	1.28637	0.0302683	147.759	212.423	408.271	21.0022	2.05776	8.6506	48.1872	5.17367	53.7439	7.65687	5.78629	5.10641	8.21714		0.408836	17.732	3.32539	46.0807	0.0870729
Set684	67.3085	20.3646	45.2074	18.2062		21.9528	20.7764	33.841	0.977652	5.22704	7.49444	7.63173	1.17614	69.3526	5.30405	0.46671	10.1951		2.76687	279.021	79.0718	10.7319	36.1001	0.25409	8.68369	0.748717	5.24327	43.9437	1.26566	0.0536686	221.347		1190.86	26.395	3.81162	2.01107	25.652	5.08892	231.932	7.79658	5.80275	6.976	36.8886		0.408836	14.4007	3.32539	48.4976	0.0870369
Set685	86.7265	28.6497	53.6595	30.1919		28.7905	25.4361	29.282	0.977652	4.78571	8.07451	16.2568	4.42534	173.678	3.99419	0.537117	10.1951		4.33957			9.46655	36.1001	0.208484	5.2887	0.748717	4.48387	16.0376	1.26566	0.0302683		69.1586	408.271	17.702	4.06172	13.16	25.652	2.6803	53.7439	7.79658	6.3335	8.43289	26.1098		1.93322	65.191	2.88527	26.2761	0.0816487
Set686		6.43539	48.1469	18.2062		26.3399	18.7967	29.282	1.02615	5.38904	8.98767	12.3101	1.17614	178.796	7.68584	0.398109	10.1951		7.22234	300.113		7.90013	37.8822	0.343061	8.96992	1.18812	4.0084	16.8122	2.28896	0.0417842	221.347	71.9155		17.757	3.70794	2.01107	83.7044	2.6803	188.202	11.0926	6.3335	6.39537	40.5495		1.32948	68.3469	4.92448	31.0842	0.0902923
Set687	43.98	6.43539	21.7895	30.1919		26.2264	21.9763	29.282	1.21857	3.43016	7.59344	18.336	4.74873	183.913	7.71052	0.398109	10.1951	10.7767	2.76687	279.021		9.46655		0.208484	5.83287	0.748717	2.4026	23.8984	1.83219	0.0251246	147.759	71.9155	408.271	27.615	4.97924	10.3488	26.7772	2.68945	115.109	9.44459	6.94451	6.39537	8.21714		0.657648	14.4007	4.40396	26.2761	0.0733301
Set688	251.958		30.8685	31.2074		21.4978	23.7044	29.282	0.980235	2.76867	8.07451	16.2568	4.74873	173.678	6.14125	0.477056	14.2625		13.0152			9.46655		0.208484	5.9569	0.92433	4.0084	41.0638	2.41969	0.0351795		70.91	408.271	17.757	4.06172	2.01107	58.5222	2.68945	53.7439	12.1411	5.78013	8.43289	22.0189		0.657648	19.9756	2.88527	69.3641	0.0858704
Set689	36.8207	6.43539	46.9089	14.7018		21.4978	21.9763	29.282	1.01846	3.86287	7.49444	7.63173	4.74873	245.804	8.28076	1.07729	12.3961	10.7767	10.7588			7.78599	36.1001	0.470466	5.83287	1.15737	2.4026	41.0638	1.26566	0.0351795			1789.52	26.395	3.70794	2.01107	25.652	2.6803		11.4933	5.80275	8.43289	8.21714		0.408836	44.1059	3.32539	108.322	0.0858704
Set690		26.9198	21.7895	14.7018		26.7417	21.9763	28.024	0.942191	3.43016	8.46268	12.3101	1.19983	178.796	6.14125	0.756352	14.1954		11.6778			12.1198		0.25409	5.83287	1.15737	2.4026	16.8122	1.26566	0.045656		69.1586		26.395	3.28053	7.32979	29.2963	4.23061	53.7439	8.8037	5.63981	7.47142	8.21714		1.77948	19.9756	2.88527	26.2761	0.0733301
Set691	35.174		53.1301	18.2062		23.5144	26.0828	29.282	0.863257	3.43016	8.14519	16.729	1.17614	69.3526	7.21268	0.923336	10.1951		12.7694		46.7608	7.11904		0.208484	5.83287	0.748717	5.3891	44.4001	1.28637	0.0351795		70.0343		17.757	4.4242	2.01107	31.0441	2.72223	53.7439	7.79658	5.78013	7.47142	26.1098		0.408836	21.8759	7.19645	31.0842	0.0844382
Set692	35.174		21.7895	14.7018		26.3399	22.6611	32.3979	0.980235	2.76867	7.59344	16.6425	5.56411	182.853	6.14125	0.910391	14.1954		12.7694		46.7608	9.55932	37.8822	0.213599	3.21069	0.748717	2.4026	16.8122	2.46969	0.0251246	147.759			28.0829	3.70794	7.29413	25.652	2.6803	115.109	7.79658	4.72465	6.976	28.3715		1.32948	19.9756	8.51581	26.2761	0.0733301
Set693	38.5003	6.43539	21.7895	19.9357		28.9467	26.246	34.0896	0.977652	3.72627	7.59344	7.63173	1.50086	69.3526	7.78936	0.923336	5.03823		7.76814			11.4805		0.294582	6.42234	0.538247	4.17741	18.3379	2.311	0.0417842		70.0343		23.3304	4.02358	2.01107	73.1548	3.91301	189.435	7.95833	5.51173	7.0537	41.7079		0.408836	71.472	4.52221	114.336	0.0733301
Set694	45.8086	26.4087	57.0274	31.2074		26.3399	25.1042	33.841	0.863257	5.13144	6.97391	17.9295	1.23708	183.913	6.14125	0.616071	5.03823	10.7767	10.7588			9.23735	36.1001	0.208484	3.21069	0.748717	2.4026	16.8122	1.28637	0.0302683	211.245	69.1586	1789.52	23.3304	4.02358	7.32979	25.652	2.6803	53.7439	8.8037	5.78013	7.44762	31.576		1.32948	63.2772	3.99482	38.5825	0.0882693
Set695		6.43539	28.1715	31.2074		24.9872	23.9896	33.1195	0.863257	3.43016	7.49444	16.2568		119.883	3.40529	1.21627	5.03823		2.61943	300.113	266.343	7.11904		0.208484	5.2887	0.538247	8.53416	16.0376	2.41628	0.0251246		212.423	1190.86	23.3304	2.05776	7.32979	63.2736	2.6803	115.109	7.65687	5.51173	10.7653	8.21714		0.646661	35.3216	6.80712	88.2577	0.0737874
Set696	35.174	20.3646	31.5962	14.7018		26.3399	22.6611	29.282	1.01063	3.43016	7.59344	7.63173	1.19983	173.678	5.78264	0.537117	12.3961		10.7588		46.7608	10.7319		0.213599	5.83287	1.15737	4.66134	29.764	1.26566	0.0302683		69.1586	408.271	26.395	3.81162	7.14109	48.1872	6.15215	53.7439	8.8037	5.63981	7.45952	6.53812		1.05943	40.4402	5.00636	38.5825	0.0864537
Set697	38.5003	20.3646	48.5531	18.2062		26.2264	21.9505	38.4968	0.977652	4.70088	8.98767	15.897	1.17614	173.678	10.9182	0.923336	10.1951		2.76687		46.7608	9.01195	37.8822	0.260688	5.83287	0.748717	2.4026	16.0376	2.54951	0.0251246	221.347	69.1586		24.5768	3.99359	10.1136	30.6617	2.6803	231.932	11.7677	5.79144	7.47142	26.1098		1.05943	21.8759	2.88527	31.0842	0.0733301
Set698	35.174	28.6497	31.5962	14.7018		26.2264	20.7764	33.1195	0.863257	4.78571	7.42665	16.729	1.23708	245.804	11.0779	0.616071	18.6115		7.14862			9.55932		0.470466	5.2887	0.748717	4.48387	16.0376	2.41969	0.0351795	221.347	71.9155	408.271	22.7586	3.81162	2.01107	30.6617	4.96656	53.7439	7.79658	5.78013	11.9094	6.53812		1.93322	14.4007	2.88527	38.5825	0.0733301
Set699	35.174	20.3646	31.3097	14.7018		24.3853	20.7764	32.7659	0.977652	5.22704	7.49444	16.2568	6.41538	69.3526	7.21268	0.616071	14.2625		2.76687			10.3341	36.1001	0.294582	3.21069	0.92433	5.4126	41.0638	1.28637	0.0467243		69.1586		28.2054	4.27732	9.41665	58.5222	3.75541	233.102	8.57751	4.72465	8.58981	8.21714		0.408836	62.6281	2.88527	38.5825	0.0844382
Set700		33.4449	21.7895	18.2062		21.4978	20.7764	29.282	1.01063	3.72627	8.98767	16.6425	1.50086	69.3526	7.78936	0.398109	14.1954		7.22234	279.021		7.11904		0.208484	8.81237	1.46491	4.17741	23.8984	2.311	0.0302683		69.1586	1190.86	29.6678	3.28053	2.01107	56.8627	2.70553	226.99	8.8037	5.78013	8.43289	31.576		2.41205	89.3791	5.69468	103.158	0.0733301
Set701			21.7895	14.7018		26.2264	25.1042	33.1195	0.784323	4.78571	7.39543	15.897	1.23708	182.853	8.60957	0.398109	14.2625	10.7767	13.0152		266.343	7.11904	37.8822	0.213599	8.68369	0.748717	4.0084	27.3477	1.26566	0.0351795		71.9155	408.271	17.8968	3.64917	7.29413	25.652	2.6803	231.932	8.8037	5.78013	5.10641	26.1098		0.657648	53.5555	2.88527	58.4128	0.0733301
Set702			21.7895	14.7018		22.9963	23.9896	33.1195	1.10047	5.36888	7.46054	7.63173	1.17614	173.678	12.3683	0.398109	12.3961		8.85429			10.2606	37.8822	0.230555	5.83287	1.15737	4.17741	41.0638	1.26566	0.0402038		71.9155	408.271	28.2983	3.84608	7.32979	29.2963	2.70553	115.109	12.1411	5.80275	9.47695	39.8722		0.408836	53.5555	2.88527	108.909	0.0733301
Set703		58.6523	42.1696	14.7018		26.3399	20.7764	30.5318	0.784323	6.76173	8.24105	16.2568	6.58232	178.796	6.14125	0.395367	14.1954		12.7694		266.343	7.11904	36.1001	0.208484	5.83287	1.18812	4.17741	15.0673	1.28637	0.0251246		69.1586	408.271	23.0654	3.64917	7.32979	25.652	3.55941	268.201	7.95833	5.78629	5.10641	8.21714		0.657648	14.4007	2.88527	88.2577	0.0733301
Set704	41.5916	26.4087	20.709	19.9357		22.0102	22.6611	29.282	1.10047	4.78571	8.28544	16.2568	1.23708	183.913	6.95962	0.756352	10.1951		8.85429			7.11904	36.1001	0.260688	3.21069	0.748717	2.4026	16.0376	2.46969	0.0402038		317.144	1190.86	29.2034	3.28053	9.66575	29.2963	4.96656	53.7439	7.79658	5.51173	9.61248	31.7851		0.657648	14.4007	7.95842	31.0842	0.0844382
Set705	38.5003	28.6497	21.7895	18.2062		12.6016	23.7044	34.0896	0.942191	4.08588	5.21587	7.63173	1.19983	173.678	7.21268	0.756352	17.9346	10.7767	2.76687			12.0569	37.8822	0.470466	5.2887	0.953044	6.05945	36.7796	1.28637	0.0351795		69.1586	408.271	30.5607	3.99359	11.097	26.7772	4.23061	231.932	11.8283	6.36088	11.9094	27.6427		0.408836	14.4007	4.52221	83.0284	0.0844382
Set706	48.2912	26.4087	21.7895	18.2062		26.3399	21.9763	29.282	0.863257	3.43016	8.46268	15.897	1.49295	182.853	6.49766	0.398109	5.03823		2.76687			7.90013	36.1001	0.208484	5.2887	0.92433	4.48387	43.9437	1.26566	0.0351795		212.423		26.395	4.59169	5.9043	73.1548	3.81476	186.621	12.1411	5.63981	10.7653	31.576		0.817671	40.4402	9.21028	38.5825	0.0733301
Set707	251.958	75.1832	48.5531	14.7018		25.2309	20.7764	34.0896	0.977652	3.43016	5.42082	15.897	1.49295	69.3526	4.7114	0.46671	14.1954		2.76687	279.021	266.343	8.8605		0.208484	5.83287	0.92433	2.4026	43.9437	2.41969	0.0565693		164.731	1789.52	27.6849	3.81162	5.9043	26.7772	2.72223	53.7439	7.95833	6.16914	10.0723	27.6427		1.71384	17.732	8.58012	390.472	0.0844382
Set708	38.5003	25.0538	31.3097	30.2121		24.3853	26.7873	33.1195	0.977652	4.78571	7.73497	23.7059	4.76275	173.678	7.68584	0.537117	10.1951		2.76687	300.113	84.6622	7.78599	36.1001	0.294582	5.83287	1.40399	2.4026	29.764	1.28637	0.0251246	147.759	220.36	1190.86	27.5875	3.64917	7.14109	30.6617	5.55785	53.7439	7.4674	5.79144	7.0537	40.2109		0.408836	40.4402	4.52221	31.0842	0.0733301
Set709	38.5003	28.7192	21.7895	30.2121		30.123	22.6611	28.024	0.977652	3.86287	7.39543	16.9885	1.17614	178.796	3.99419	0.537117	14.1954		8.85429			7.11904		0.294582	5.83287	0.748717	2.4026	24.0335	2.22341	0.0302683	147.759	69.1586	408.271	23.0654	3.81162	2.01107	29.2963	2.6803	53.7439	7.72673	5.78013	10.7653	36.0389		1.05943	19.9756	5.46381	38.5825	0.0733301
Set710	29.3093	20.3646	21.7895	14.7018		26.2264	34.5741	39.1416	0.942191	4.70088	7.59344	12.3101	1.17614	119.883	8.28076	0.398109	14.1954		2.76687	279.021	84.6622	7.11904		0.213599	3.21069	1.15737	4.17741	23.8984	1.26566	0.0683904		69.1586	1190.86	24.5768	4.58302	2.01107	26.7772	2.6803	83.712	8.8037	5.79144	6.39537	22.0189		0.657648	19.9756	5.00636	38.5825	0.0733301
Set711		20.3646	21.7895	14.7018		22.6496	20.7764	39.1416	0.863257	3.72627	7.41104	12.3101	1.19983	69.3526	7.71052	0.477056	14.1954		7.22234	300.113		7.11904		0.427333	5.83287	0.748717	4.48387	23.8984	2.54951	0.0351795		212.423	1789.52	24.5768	3.70794	7.29413	30.6617	5.39116	53.7439	8.57751	5.80275	7.47142	8.21714		0.657648	62.6281	3.32539	88.2577	0.0844382
Set712	44.6829	20.3646	48.5531	29.6301		26.3399	20.7764	28.024	1.53731	3.72627	8.07451	12.3101	1.19983	178.796	7.21268	0.477056	14.2625		2.76687	300.113		11.4805	36.1001	0.208484	3.21069	1.15737	6.05945	34.0688	1.26566	0.0402038		70.91		17.757	4.27732	5.9043	29.2963	2.6803	98.0799	7.95833	5.51173	6.976	27.6427		0.817671	19.9756	4.52221	26.2761	0.0733301
Set713		28.7192	48.5531	14.7018		26.5098	21.9763	34.0896	0.977652	5.22704	8.07451	7.63173	1.49295	173.678	7.21268	0.398109	12.3961		10.7588			9.46655		0.208484	9.396	1.18812	4.66134	53.0703	1.26566	0.0351795		70.91	1190.86	30.8209	4.59169	7.29413	29.2963	5.29965		7.44635	5.78629	7.0537	8.21714		0.817671	17.732	7.19645	83.0284	0.0844382
Set714	43.98	20.3646	47.6799	14.7018		26.2264	18.7967	33.1195	1.07547	5.13144	7.59344	7.63173	1.23708	173.678	7.78936	0.398109	12.3961		10.7588			7.11904	36.1001	0.25409	7.20538	0.748717	4.0084	23.8984	2.311	0.0302683	221.347	70.91		41.332	3.99359	11.097	26.7772	2.68945	53.7439	8.57751	5.78013	8.43289	8.21714		0.657648	19.9756	5.94457	46.0807	0.0733301
Set715	57.7998	20.3646	31.3097	18.2062		23.5144	22.8327	45.4193	0.980235	2.76867	8.30485	16.729	1.29945	182.853	7.33111	0.798041	8.99574		2.76687			7.78599		0.208484	3.21069	1.18812	4.81939	16.8122	2.311	0.0302683	147.759	70.0343		22.7586	3.28053	2.01107	30.6617	3.55941	53.7439	9.44459	6.10755	10.3087	8.21714		0.408836	17.732	5.46381	26.2761	0.0844279
Set716	46.3685	20.3646	21.7895	18.2062		23.5144	21.9763	33.1195	0.863257	3.72627	6.92441	12.3101	1.19983	178.796	6.49766	0.395367	8.99574		2.76687		46.7608	7.11904	36.1001	0.25409	5.83287	1.15737	4.17064	15.0673	2.54361	0.0251246		69.1586	1190.86	17.702	3.28053	2.01107	31.0441	2.70553	278.324	7.95833	5.80275	8.43289	27.6427		0.817671	14.4007	3.32539	93.9337	0.0733301
Set717	29.3093	20.3646	21.7895	30.2121		23.165	18.7967	29.282	0.980235	3.43016	7.59344	15.897	1.23708	69.3526	6.14125	0.756352	5.03823		2.76687	279.021	46.7608	9.46655		0.208484	3.21069	1.31311	4.48387	16.8122	1.26566	0.0251246		212.423	1789.52	17.757	4.41164	7.29413	29.2963	2.70553	282.847	8.57751	4.72465	9.61248	6.53812		2.35915	14.4007	5.46381	58.0988	0.0733301
Set718	46.3685	20.3646	52.3698	29.6301		26.3399	21.9763	32.3979	0.942191	4.7652	8.07451	16.729	9.87632	121.515	9.64394	0.853231	16.9057		2.76687	279.021	266.343	10.1156	37.8822	0.470466	7.34353	1.15737	4.17741	27.3477	1.26566	0.0453523		69.1586	1789.52	24.5768	3.64917	2.01107	66.6309	4.23061	53.7439	7.72673	5.78629	9.61248	22.0189		0.408836	19.9756	3.32539	26.2761	0.0870729
Set719	181.342	20.3646	21.7895	14.7018		30.123	21.9763	33.1195	0.549093	5.22704	7.49444	15.897	1.49295	69.3526	7.21268	0.477056	10.1951		4.17057	342.514		7.11904	36.1001	0.86356	8.68369	1.46491	4.48387	43.9437	2.311	0.0302683		69.1586	408.271	27.5875	3.84608	2.01107	25.652	2.6803		7.79658	5.63981	7.0537	26.1098		1.05943	62.6281	5.94457	58.0988	0.079833
Set720	38.5003	20.3646	48.5531	14.7018		23.7752	25.4361	28.024	0.977652	5.22704	7.83397	17.9295	1.23708	221.206	11.0779	0.398109	16.9108		13.01			10.2606		0.294582	8.62603	0.748717	2.4026	23.8984	2.36562	0.0402038		69.1586		28.2983	4.58302	2.01107	31.0441	2.6803	233.102	7.79658	5.78013	6.976	40.5495		1.71384	14.4007	4.92448	26.2761	0.0733301
Set721	35.174	20.3646	48.9698	14.7018		23.9359	21.9763	33.841	0.977652	5.22704	7.59344	7.63173	1.50086	173.678	8.36604	0.686211	5.03823		2.76687	279.021	394.928	9.46655	36.1001	0.294582	3.21069	1.58113	4.17741	43.9437	2.63387	0.0417842	221.347	212.423		21.0022	3.77153	7.29413	30.6617	2.70553	231.932	9.44459	6.3335	9.61248	26.1098		0.408836	14.4007	3.32539	31.0842	0.0733301
Set722		36.7565	31.3097	33.7172		26.2264	21.9763	46.0037	0.977652	3.43016	7.49444	16.729	1.29945	183.913	8.36604	0.50709	14.1954		4.17057		84.6622	7.11904		0.294582	5.2887	0.748717	4.66134	20.6382	1.26566	0.0251246	147.759	250.664	1190.86	29.6514	3.28053	2.01107	29.2963	3.55941	115.109	7.79658	6.3335	8.43289	31.7851		0.408836	53.5555	5.00636	52.2467	0.0844382
Set723	44.6829	6.43539	28.1715	18.2062		21.9528	18.7967	29.282	0.977652	3.43016	8.46268	16.2568	1.23708	245.804	10.4495	0.398109	19.3745	10.7767	2.76687			6.32316		0.505343	3.21069	0.748717	5.79787	49.0132	2.46969	0.0565236	147.759	264.565	408.271	23.3304	3.70794	5.9043	29.2963	2.70553	53.7439	7.95833	6.10755	7.47142	6.53812		0.817671	40.4402	5.69468	58.0988	0.0878502
Set724	35.174	6.43539	30.8685	30.2121		26.7417	23.7044	22.9363	0.863257	3.43016	7.49444	15.897	1.23708	183.913	7.71052	0.398109	16.9057		8.85429	279.021		7.11904		0.208484	8.96992	1.59568	4.0084	16.8122	1.28637	0.0302683		69.1586	408.271	27.6849	3.64917	11.5035	31.0441	5.824	282.847	7.95833	6.16914	7.0537	6.53812		1.57553	19.9756	4.52221	31.0842	0.108379
Set725	35.174	28.6497	59.4655	14.7018		23.5144	18.7967	29.282	0.977652	4.43494	7.41104	16.6425	1.49295	183.913	8.28076	0.477056	10.1951	10.7767	13.0152		79.0718	7.78599	37.8822	0.427333	5.83287	0.748717	4.17741	16.8122	1.85087	0.0351795	147.759	70.91		23.0654	3.84608	5.9043	31.0441	2.6803	231.143	7.79658	6.2988	6.976	31.576		1.05943	14.4007	5.69468	93.9337	0.0737956
Set726		36.4746	57.0274	31.2074		30.123	22.8327	32.2555	0.863257	5.33887	7.59344	7.63173	6.58232	173.678	8.60957	0.778384	5.03823		8.85429	279.021	46.7608	9.76534	36.1001	0.230555	3.21069	1.15737	4.0084	27.3477	1.26566	0.045656		70.0343		23.3304	3.81162	2.01107	26.7772	2.6803	231.932	7.79658	5.80275	8.43289	31.7851		0.657648	17.732	6.80712	26.2761	0.0733301
Set727	35.174	20.3646	48.1469	14.7018		21.9528	20.7764	38.4968	0.980235	5.38904	7.02341	16.9885	1.73818	119.353	9.2045	0.616071	14.1954		4.17057	279.021	79.0718	7.78599		0.208484	9.89442	0.748717	2.4026	23.8984	2.36562	0.0302683	221.347	69.1586	408.271	26.395	3.84608	6.9524	30.6617	5.12134	53.7439	11.7677	6.3335	6.976	31.576		1.05943	14.4007	5.46381	38.5825	0.0864537
Set728	29.3093	28.7192	48.9698	29.6301		21.4978	23.7044	48.3083	0.942191	3.43016	7.78447	7.63173	1.19983	173.678	6.14125	0.398109	8.99574		13.0152		46.7608	9.01195		0.230555	5.83287	1.18812	2.4026	23.8984	2.12622	0.0251246		69.1586	1190.86	27.615	4.27732	10.1136	29.2963	2.6803	53.7439	7.79658	5.78013	6.976	31.7851		0.408836	40.4402	4.92448	83.0284	0.0733301
Set729	35.174	20.3646	48.5531	18.2062		24.3853	22.6611	29.282	0.942191	3.72627	7.49444	7.63173	1.19983	119.353	6.14125	0.403903	14.1954		4.17057		46.7608	7.78599	36.1001	0.208484	5.2887	0.92433	2.4026	34.0688	1.26566	0.0351795	221.347	164.731		24.5768	3.64917	2.01107	63.2736	2.6803	231.932	11.0926	5.51173	7.47142	27.6427		1.05943	14.4007	5.46381	58.4128	0.0844382
Set730	44.6829	20.3646	21.7895	18.2062		22.6496	20.7764	46.0037	0.863257	1.4214	6.45339	16.6425	1.17614	69.3526	6.95962	0.616071	5.03823	10.7767	2.76687	374.165	46.7608	7.11904	36.1001	0.343061	6.42234	1.8775	2.4026	16.0376	1.83219	0.0251246	147.759	71.9155		24.5768	3.70794	2.01107	25.652	2.68945	115.109	7.79658	5.80275	6.976	6.53812		0.817671	14.4007	2.88527	26.2761	0.0733301
Set731	35.174	20.3646	25.3164	14.7018		24.5801	23.7044	33.1195	0.977652	4.70088	7.59344	15.897	1.49295	259.558	6.49766	0.616071	15.6379		13.6864			7.11904		0.208484	5.83287	1.58113	4.48387	23.8984	2.12622	0.0351795		71.9155	1190.86	17.757	3.28053	5.9043	31.0441	2.6803	268.201	8.91785	4.72465	8.43289	27.6427		0.657648	21.8759	3.32539	73.1132	0.0791169
Set732	35.174	20.3646	42.1113	18.2062		24.5801	21.9763	38.4968	1.05969	4.78571	7.42665	15.897	3.26056	69.3526	7.21268	0.477056	10.1951		2.76687	279.021	79.0718	10.1156		0.230555	8.68369	1.15737	4.0084	16.0376	1.28637	0.0435683	211.245	69.1586		24.5768	3.64917	5.9043	29.2963	4.96656	115.109	7.95833	5.51173	7.44762	8.21714		1.75544	21.8759	4.92448	46.0807	0.0733301
Set733	41.5916	20.3646	21.7895	30.1332		26.2264	22.6611	38.4968	0.942191	3.43016	7.59344	16.0853	1.17614	69.3526	6.14125	0.398109	5.03823	10.7767	2.76687	300.113		7.11904	37.8822	0.427333	8.68369	0.748717	4.17741	18.4641	2.311	0.0433572		70.0343	408.271	17.757	3.70794	6.9524	30.6617	3.39892	53.7439	8.57751	5.79144	5.10641	27.6427		0.657648	40.4402	4.76429	83.0284	0.0733301
Set734	45.8086	6.43539	30.8685	37.5903		11.973	20.7764	34.0896	1.07547	3.72627	7.83397	7.63173	2.1769	69.3526	5.1065	0.398109	14.2625	10.7767	2.61943	279.021	46.7608	7.11904	39.3233	0.208484	8.98037	1.40399	4.0084	27.3477	2.12622	0.0385853	211.245	69.1586		28.506	3.81162	7.32979	48.1872	4.23061	115.109	11.0926	5.78013	7.47142	28.3715		0.817671	21.8759	4.40396	26.2761	0.0864537
Set735	41.5916	36.7565	48.5531	18.2062		26.7417	20.7764	29.282	0.942191	3.43016	8.07451	22.5511	1.23708	182.853	6.49766	0.46671	5.03823		9.43942	279.021	46.7608	10.9619		0.294582	5.2887	0.748717	10.3765	23.8984	1.26566	0.0302683		70.91		24.5768	3.70794	7.14109	29.2963	2.6803	53.7439	7.65687	6.10755	7.47142	26.1098		1.93322	17.732	5.00636	38.5825	0.0733301
Set736		6.43539	47.6799	30.2121		26.3399	20.7764	38.4968	1.02615	4.7652	7.49444	16.2568	1.23708	253.726	7.21268	0.756352	21.6405		14.5144			7.78599	36.1001	0.343061	5.83287	0.748717	8.53416	27.3477	1.26566	0.0251246	211.245	212.423		26.395	3.70794	7.14109	29.2963	5.78433	53.7439	8.57751	5.80275	8.43289	26.1098		0.657648	53.5555	2.88527	26.2761	0.0844382
Set737	251.958	6.43539	20.709	14.7018		24.5217	21.9763	38.4968	0.980235	3.43016	7.91977	12.3101	1.19983	178.796	8.60957	0.616071	14.2625		2.76687	300.113		9.46655		0.213599	5.2887	1.18812	4.17741	16.0376	2.42025	0.0251246	147.759	70.0343	408.271	26.395	4.41164	6.9524	73.1548	2.70553	53.7439	9.37473	5.78013	7.47142	8.21714		0.657648	62.6281	2.88527	58.4128	0.0844382
Set738	48.2912	38.6049	21.7895	29.6301		28.7905	21.9763	39.8408	0.980235	3.86287	8.1603	16.9885	1.19983	178.796	7.71052	0.616071	8.99574		7.22234	300.113		7.11904		0.213599	7.32029	0.748717	2.4026	71.9575	2.311	0.0251246		70.0343	1789.52	24.5768	3.84608	2.01107	31.0441	2.6803	188.202	7.95833	5.78013	7.0537	31.7851		0.408836	14.4007	2.88527	108.322	0.0733301
Set739	251.958	88.5187	21.7895	36.7476		26.2264	20.7764	46.0037	1.07547	2.76867	7.49444	12.3101	1.19983	69.3526	9.64394	0.537117	21.584		2.76687	279.021		9.46655		0.470466	7.32029	1.15737	4.17741	15.0673	2.54951	0.0351795		70.91	408.271	22.7586	3.70794	2.01107	68.8573	2.6803	53.7439	8.57751	8.96632	10.3087	27.6427		0.408836	65.191	3.32539		0.0844382
Set740	41.5916	20.3646	21.7895	14.7018		24.5801	26.0828	32.3979	0.980235	6.61367	7.49444	17.2964	1.17614	245.804	8.36604	0.616071	5.03823		2.76687		46.7608	7.11904	37.8822	0.208484	3.21069	1.59568	4.33288	49.0132	1.26566	0.0417842	221.347	70.91	1789.52	21.0022	4.8614	5.9043	26.7772	3.81476	53.7439	7.95833	5.63981	7.47142	8.21714		1.80375	63.2772	2.88527	26.2761	0.0791169
Set741	48.2912	6.43539	31.3097	36.1487		24.2355	22.8327	33.1195	0.942191	3.72627	7.39543	16.2568	1.49295	183.383	7.21268	0.398109	14.1954		2.76687		79.0718	7.11904	39.3233	0.230555	8.96992	1.8775	4.48387	23.8984	1.83219	0.0402038		212.423		21.0022	3.84608	2.01107	29.2963	4.23061	231.932	7.79658	6.10755	10.3087	6.53812		0.408836	19.9756	5.46381	31.0842	0.0791169
Set742	35.174	6.43539	56.0511	14.7018		26.3399	23.7044	38.4968	0.850156	3.72627	7.39543	24.1388	4.42534	69.3526	7.71052	0.724461	18.2931	10.7767	2.76687		266.343	9.46655	39.3233	0.213599	5.83287	1.15737	4.81939	72.7446	1.28637	0.0467243		70.91		31.1111	3.81162	6.9524	73.1548	2.6803	231.932	8.8037	5.78013	9.61248	8.21714		1.57553	43.1557	2.88527	116.483	0.0791169
Set743		26.9198	21.7895	14.7018		26.2264	21.9763	33.1195	0.980235	5.22704	7.59344	15.897	1.17614	182.853	7.33111	0.398109	5.03823		4.17057			10.7319		0.208484	5.83287	1.42014	6.05945	16.0376	1.28637	0.0543341	221.347	69.1586		24.5768	3.28053	2.01107	25.652	2.70553	231.932	7.95833	8.187	9.61248	6.53812		0.657648	14.4007	5.00636	88.2577	0.0844279
Set744	29.3093	6.43539	48.1469	18.2062		32.1634	21.9763	46.0037	0.942191	3.72627	7.59344	12.3101	1.19983	178.796	7.33111	0.46671	10.1951		11.6778			10.3341		0.260688	5.9569	0.748717	5.41668	16.7657	2.54951	0.0565236		71.9155	408.271	27.6849	3.64917	9.41665	30.6617	2.72223	188.202	11.0926	5.78013	7.47142	27.6427		0.817671	62.6281	7.19645	58.0988	0.0882693
Set745	46.3685	6.43539	21.7895	18.2062		26.3399	20.7764	46.0037	0.863257	3.43016	7.39543	15.897	6.06591	182.853	4.7114	0.477056	5.03823	10.7767	2.76687	279.021	46.7608	7.78599	39.3233	0.208484	3.21069	0.748717	4.33288	15.0673	1.26566	0.0435683		268.835	1190.86	17.702	3.75932	2.01107	48.1872	3.75541	53.7439	7.66008	5.78013	10.0723	26.1098		0.657648	21.8759	2.88527	26.2761	0.0767362
Set746	41.5916	6.43539	21.7895	14.7018		21.4978	20.7764	46.0037	0.942191	2.76867	7.59344	16.729	5.58206	69.3526	7.21268	0.398109	20.7572		7.22234	279.021	79.0718	7.11904		0.213599	8.81237	0.92433	4.0084	43.9437	1.26566	0.0351795	147.759	70.0343	1789.52	29.2034	5.16967	2.01107	88.0733	3.81476		7.77747	5.78629	8.43289	31.576		0.657648	19.9756	5.69468	83.0284	0.0733301
Set747	45.5257	26.9198	45.529	18.2062		23.9359	25.4361	29.282	0.927279	5.94591	7.51004	15.897	1.23708	228.828	7.21268	0.477056	14.2625		8.85429			11.4805		0.208484	3.21069	0.748717	4.0084	34.0688	1.26566	0.0302683	147.759	70.91	1190.86	27.615	3.28053	8.6506	48.1872	3.81476	83.712	2.95501	5.78013	8.43289	31.576		1.57553	40.4402	2.88527	58.4128	0.0895017
Set748	35.174	6.43539	30.8685	28.7898		26.2264	21.9763	34.0896	1.158	3.43016	7.18555	16.9885	5.58206	126.633	6.14125	0.398109	5.03823	10.7767	10.7588	279.021	46.7608	7.11904	37.8822	1.21343	8.96992	1.18812	4.0084	23.8984	2.42025	0.0417842		278.466	408.271	26.395	3.84608	2.01107	30.6617	4.96656		11.0926	5.78013	8.43289	26.1098		1.93322	17.732	4.92448	44.7485	0.0858704
Set749	35.174	6.43539	48.5531	14.7018		26.2264	26.0828	29.282	0.977652	2.76867	8.94294	16.6425	1.17614	259.558	3.99419	0.616071	5.03823	10.7767	2.76687		46.7608	7.11904	36.1001	0.230555	6.42234	0.748717	5.41668	16.0376	1.28637	0.0402038	147.759	71.9155		34.1742	4.06172	2.01107	30.6617	2.6803	115.109	7.66008	5.78013	5.10641	31.576		0.817671	62.6281	7.95271	88.2577	0.0844382
Set750	38.5003	6.43539	31.5962	18.2062		23.5144	20.7764	28.024	0.863257	3.43016	8.46268	16.9885	4.80438	178.796	7.33111	0.477056	5.03823	10.7767	10.7588	279.021	394.928	7.11904	37.8822	0.230555	5.2887	1.15737	4.17741	16.0376	2.311	0.0402038		69.1586	1789.52	23.3304	3.84608	2.01107	30.6617	2.72223	226.99	7.79658	5.78013	9.02068	27.6427		0.408836	40.4402	3.32539	91.0957	0.0844382
Set751	38.5003	33.4449	20.709	18.2062		22.9963	20.7764	49.7816	0.982369	3.72627	6.94002	16.729	1.49295	182.853	5.30405	0.616071	19.7384	10.7767	10.7588		266.343	10.7319	36.1001	0.208484	5.83287	1.58113	4.0084	16.8122	1.83219	0.0351795		69.1586	408.271	28.2983	4.97924	7.29413	75.3275	2.6803	53.7439	7.95833	5.78013	8.58981	8.21714		0.657648	66.3359	5.69468	108.322	0.0870369
Set752	67.3085	6.43539	31.5962	19.9357		22.9963	25.4361	28.024	0.980235	2.76867	8.98767	15.897	1.17614	245.804	7.21268	0.46671	10.1951	10.7767	14.5101		46.7608	10.7319	36.1001	0.294582	5.83287	0.748717	4.48387	43.9437	2.46969	0.0453523	164.279	69.1586	408.271	17.757	3.70794	7.32979	30.6617	2.68945	53.7439	7.65687	5.80275	8.43289	27.6427		0.408836	19.9756	3.32539	88.2577	0.0733301
Set753	44.6829	25.0538	48.9698	14.7018		11.973	25.1042	29.282	0.980235	3.72627	7.42665	7.63173		384.467	11.0779	0.616071	12.3961	10.7767	2.76687		46.7608	7.11904	37.8822	0.208484	5.83287	0.748717	2.4026	15.0673	1.26566	0.0433572		69.1586	408.271	26.395	3.64917	2.01107	29.2963	2.6803	268.201	7.44635	5.78013	11.4696	8.21714		0.657648	14.4007	4.40396	108.322	0.0844382
Set754	41.5916	6.43539	31.5962	31.2074		23.9359	25.4361	46.6882	0.863257	4.2591	7.42665	16.2568	1.73818	182.853	8.60957	0.398109	18.2931		8.85429		394.928	9.46655		1.42772	8.62603	1.18812	4.0084	32.291	2.36562	0.0453523	147.759	69.1586		31.0372	4.51622	5.9043	85.8889	2.72223	53.7439	7.65687	5.79144	10.4431	31.576		0.817671	40.4402	4.92448	26.2761	0.0870729
Set755	35.174	6.43539	21.7895	18.2062		21.4978	20.7764	22.9363	1.62837	5.54631	4.38824	16.2568	1.49295	173.678	7.33111	0.398109	10.1951		11.6778		266.343	9.00815		0.208484	5.9569	1.15737	4.0084	16.8122	2.311	0.0302683		70.0343	1190.86	27.5875	3.99359	2.01107	26.7772	2.6803	115.109	7.44635	5.80275	10.0723	27.6427		0.657648	14.4007	4.40396	83.0284	0.0733301
Set756	35.174	20.3646	21.7895	18.2062		26.3399	20.7764	34.0896	1.02615	3.72627	8.07451	7.63173	1.73818	245.804	7.92492	0.537117	14.1954	10.7767	9.51314			9.46655	37.8822	0.427333	3.21069	0.748717	5.18696	16.0376	2.54361	0.0251246		220.36	1190.86	28.0829	3.81162	2.01107	48.1872	3.55941	115.109	7.79658	5.80275	11.4696	8.21714		0.657648	14.4007	2.88527	58.4128	0.0918615
Set757	35.174	33.4449	31.3097	31.0802		24.507	21.9763	34.0896	0.942191	3.72627	6.76623	16.2568	1.17614	263.989	16.4298	0.477056	19.3745		4.17057			7.78599		1.0944	8.91495	1.18812	4.17741	16.8122	1.26566	0.0251246	147.759	69.1586	1190.86	26.395	3.99359	2.01107	29.2963	5.08892	53.7439	8.8037	5.80275	7.45952	27.6427		0.408836	40.4402	7.19645	88.2577	0.0844279
Set758	35.174	20.3646	21.7895	14.7018		26.3399	21.9763	31.2195	0.863257	6.30434	8.30485	12.3101	1.19983	69.3526	7.74672	0.477056	10.1951		2.76687	300.113		7.78599	36.1001	0.208484	8.62603	0.92433	2.4026	15.0673	1.26566	0.0453523	147.759	69.1586	1789.52	17.757	3.64917	5.9043	56.8627	2.6803		7.66008	5.78013	10.0723	6.53812		0.657648	17.732	2.88527	58.4128	0.0870729
Set759	41.5916	28.6497	48.5531	14.7018		28.5161	20.7764	33.1195	0.784323	3.43016	7.49444	16.2568		69.3526	8.36604	0.395367	14.2625	10.7767	2.76687			7.78599	37.8822	0.294582	5.9569	1.59568	5.79787	16.0376	2.38351	0.0565236	147.759	69.1586	1789.52	17.702	3.07539	2.01107	29.2963	2.70553	188.202	7.79658	5.63981	10.254	8.21714		0.817671	65.191	3.32539	108.322	0.0855259
Set760	44.6829	6.43539	47.6799	34.968		26.2264	20.7764	44.9554	0.977652	4.7652	8.98767	7.63173	1.17614	173.678	6.14125	0.756352	14.2625		11.6778			7.11904		0.427333	3.21069	0.748717	4.66134	15.0673	1.28637	0.0453523		171.69		17.757	3.28053	2.01107	31.0441	2.72223	115.109	7.79658	6.54667	10.8707	31.7851		0.408836	75.5818	5.94457	102.628	0.0733301
Set761	36.8207	6.43539	46.9089	31.2074		23.5144	20.7764	58.6431	0.980235	5.53867	7.49444	16.9885	1.23708	126.633	11.0779	0.616071	12.4786		2.76687	279.021	394.928	7.78599	37.8822	0.294582	5.83287	1.18812	4.0084	15.0673	2.48488	0.0302683		269.925		28.0829	3.81162	5.9043	29.2963	4.2666	53.7439	11.0926	6.53499	10.3087	26.1098		0.657648	62.6281	2.88527	46.0807	0.0844382
Set762	41.5916	6.43539	21.7895	31.2074		24.5801	21.9763	63.919	0.863257	1.4214	5.21587	7.63173	1.23708	69.3526	6.14125	0.616071	18.6882	10.7767	2.76687	300.113		9.23925	37.8822	0.294582	3.21069	0.748717	4.17741	16.0376	2.41969	0.0417842	211.245	212.423	1789.52	29.2034	3.70794	6.9524	73.1548	2.6803	77.02	7.87746	4.72465	6.976	50.3481		1.97223	14.4007	4.92448	38.5825	0.0816487
Set763	251.958	6.43539	21.7895	14.7018		21.4978	21.9763	29.282	0.980235	2.76867	8.05974	16.6425	2.1769	119.883	6.14125	0.46671	18.6347		8.85429	279.021	79.0718	9.55932		0.208484	8.68369	1.18812	7.8061	16.0376	1.93274	0.0302683		212.423	1190.86	23.0654	3.84608	7.32979	30.6617	2.6803	179.624	7.4253	6.10755	5.10641	8.21714		0.646661	43.8292	2.88527	88.2577	0.0870369
Set764	67.3085	6.43539	21.7895	18.2062		11.973	21.9763	29.282	0.980235	5.50261	8.98767	16.9885	1.73818	119.883	6.14125	0.537117	14.2625		2.76687	279.021		7.11904	36.1001	0.343061	3.21069	0.748717	2.4026	16.0376	2.42025	0.0453523		70.91	1789.52	24.5768	4.01121	6.9524	66.6309	5.55785	115.109	7.95833	5.79144	7.66865	27.6427		1.71384	14.4007	5.46381	88.2577	0.0844382
Set765	35.174	6.43539	49.5943	14.7018		10.5441	21.9763	32.2555	0.977652	1.4214	7.73497	7.63173	1.49295	183.383	8.28076	0.398109	10.1951		12.7694			7.11904		0.470466	3.21069	1.18812	5.3891	23.8984	2.54951	0.0543341	147.759	69.1586	408.271	17.702	3.70794	6.9524	73.1548	4.23061	53.7439	9.44459	5.63981	10.254	8.21714		1.71384	43.1557	5.63794	88.2577	0.0733301
Set766	36.8207	20.3646	21.7895	14.7018		21.9528	20.7764	28.024	0.549093	3.43016	8.07451	15.897	1.49295	119.353	6.14125	0.398109	21.584		10.2107	325.79		7.78599	36.1001	0.213599	8.68369	1.15737	4.0084	24.0335	1.26566	0.0351795	147.759			17.757	3.81162	2.01107	48.1872	3.75541	53.7439	7.77747	6.16914	10.7653	27.6427		0.646661	14.4007	2.88527	52.2467	0.0870729
Set767		20.3646	21.7895	18.2062		26.3399	20.7764	38.4968	1.36374	2.76867	8.07451	16.6425	6.58232	119.353	8.0922	0.398109	17.8797	10.7767	4.17057	279.021	79.0718	10.8238		0.25409	5.83287	0.748717	4.17741	45.0385	1.26566	0.0251246		71.9155		28.2983	3.81162	9.41665	29.2963	4.23061	53.7439	7.4253	6.3335	8.43289	31.7851		0.408836	43.1557	5.00636	26.2761	0.0844279
Set768	35.174	6.43539	31.3097	30.2121		23.5144	21.9763	30.5318	0.971162	4.70088	8.07451	12.3101	1.17614	69.3526	8.60957	0.798041	14.2625		2.76687	279.021	84.6622	7.78599		0.208484	5.83287	0.605806	4.98034	34.0688	2.42025	0.0251246	221.347	71.9155	1789.52	28.2983	3.70794	5.9043	75.4238	3.39892	53.7439	7.79658	5.78013	7.44762	26.1098		1.99292	62.6281	2.88527	93.9337	0.0733301
Set769	41.5916	6.43539	31.3097	30.1919		24.3853	21.9505	22.9363	0.927279	5.13144	8.98767	16.9885	1.49295	178.796	8.36604	0.50709	10.1951		4.17057	279.021	46.7608	12.9157	37.8822	0.807022	8.68369	0.748717	4.17741	41.0638	2.42025	0.0251246	221.347	69.1586	1190.86	17.757	4.06172	2.01107	56.8627	2.6803	53.7439	7.79658	5.78013	11.4696	27.6427		0.657648	65.191	4.40396	26.2761	0.0844382
Set770	35.174		21.7895	34.968		26.2264	22.8327	28.024	0.863257	3.90491	7.39543	7.63173	1.23708	55.853	6.72864	0.398109	5.03823		2.61943			9.55932	37.8822	0.208484	3.21069	0.92433	5.75339	16.8122	2.41969	0.0251246	211.245	171.69	1789.52	21.0022	3.28053	2.01107	25.652	2.6803	53.7439	12.1411	4.72465	6.39537	31.7851		0.817671	14.4007	4.76429	26.2761	0.0844382
Set771	35.174	20.3646	48.5531	14.7018		26.2264	22.8327	33.1195	1.07018	3.72627	7.46054	16.729	1.73818	119.353	8.28076	0.46671	8.99574		8.09591			7.11904		0.294582	5.2887	0.748717	4.48387	10.7516	1.28637	0.0467243	147.759	69.1586	1789.52	17.702	3.70794	7.32979	66.6309	5.18658	98.0799	7.4674	6.10755	10.8707	27.6427		1.57553	21.8759	4.40396	93.9337	0.0895017
Set772		6.43539	21.7895	18.2062		26.2264	23.7044	38.4968	0.980235	3.22714	9.28229	16.2568	1.23708	173.678	7.71052	0.395367	21.291		11.6778			7.11904	39.3233	0.294582	5.83287	1.15737	2.4026	27.3477	2.54361	0.0302683	147.759	69.1586		29.0283	3.84608	7.32979	25.652	2.6803	115.109	8.57751	5.63981	7.47142	8.21714		0.408836	14.4007	4.52221	88.2577	0.109511
Set773		54.3141	21.7895	18.2062		23.5144	21.9763	46.0037	0.977652	3.43016	8.07451	16.6425	6.06591	245.804	6.14125	0.398109	14.1954		11.6778			7.78599		0.230555	8.68369	1.15737	4.48387	43.9437	1.28637	0.0351795		69.1586	408.271	17.757	3.64917	5.9043	75.3275	2.68945	231.932	7.79658	5.78013	10.0723	6.53812		2.02031	63.2772	2.88527	81.7814	0.0733301
Set774		26.4087	64.8466	34.5342		26.3399	21.9763	32.6782	0.980235	3.72627	5.94134	7.63173	9.87632	69.3526	6.14125	0.398109	16.3865		2.76687	279.021	46.7608	7.11904	36.1001	0.470466	8.68369	1.15737	4.0084	41.0638	2.42025	0.0251246	147.759	70.91	1190.86	23.3304	3.28053	8.6506	29.2963	3.55941	53.7439	7.72673	5.78013	10.3087	26.1098		1.71384	35.3216	4.40396		0.0858704
Set775	45.2487		28.1715	18.2062		26.3399	22.6611	34.0896	0.863257	2.76867	8.0618	16.2568	7.00608	228.828	7.33111	0.756352	12.3961		14.1385			7.11904	36.1001	0.343061	5.83287	1.18812	4.17741	45.0385	1.26566	0.0351795		70.0343	408.271	31.0372	4.97924	7.32979	29.2963	5.08892		7.44635	5.78013	10.0723	22.0189		1.97223	14.4007	4.76429	26.2761	0.0840325
Set776	36.8207	20.3646	20.709	19.9357		23.9359	18.7967	32.3979	0.784323	4.78571	7.42665	16.2568	1.17614	182.853	7.71052	0.616071	8.99574		12.7515			7.11904		0.208484	9.44137	1.42014	4.66134	16.8122	2.42025	0.0402038	147.759	69.1586		34.1742	3.70794	7.29413	30.6617	2.6803		7.95833	5.63981	13.0974	6.53812		0.657648	62.6281	2.88527	88.2577	0.0733301
Set777	251.958	20.3646	20.709	14.7018		26.2264	20.7764	44.9554	0.549093	4.7652	8.07451	16.9885	1.17614	69.3526	6.02126	0.398109	14.1954	10.7767	2.76687	300.113	46.7608	7.78599		0.208484	5.83287	0.92433	4.49711	16.8122	1.26566	0.0251246		70.0343	1789.52	17.8968	3.81162	7.14109	29.2963	2.6803	177.672	8.8037	6.54667	10.3087	6.53812		0.408836	14.4007	4.52221	73.1132	0.0864537
Set778	38.5003	26.4087	47.6799	14.7018		26.3399	18.7967	29.282	0.977652	3.43016	7.49444	12.3101	1.19983	178.796	10.9182	0.537117	14.2625	10.7767	13.01		79.0718	9.55932	36.1001	0.213599	5.9569	0.748717	4.0084	32.291	2.38692	0.0302683		78.1269	408.271	26.395	3.81162	7.14109	26.7772	3.55941	53.7439	7.72673	5.78013	6.976	8.21714		2.90453	14.4007	9.56959	31.0842	0.0733301
Set779	38.5003	36.4746	31.3097	18.2062		30.7339	21.9763	34.0896	1.05969	2.76867	7.49444	16.2568	1.49295	183.383	6.14125	0.46671	5.03823		4.17057		266.343	7.78599		0.213599	3.21069	1.18812	5.18696	16.8122	1.26566	0.0435683		287.006	408.271	17.757	3.70794	8.16582	26.7772	3.77702	189.435	10.0265	5.80275	10.254	28.3715		0.408836	17.732	3.32539	26.2761	0.0844382
Set780	35.174	6.43539	48.5531	30.2121		22.9963	22.6611	29.282	0.977652	5.38904	7.59344	15.897	6.06591	69.3526	8.60957	0.616071	10.1951		2.76687		79.0718	7.78599	39.3233	0.505343	8.62603	1.15737	4.66134	23.8984	1.26566	0.0251246		69.1586		17.702	3.70794	2.01107	30.6617	2.6803	189.435	11.4933	5.78013	8.43289	8.21714		0.408836	19.9756	3.32539	73.1132	0.0733301
Set781	67.3085	6.43539	59.6995	14.7018		24.3853	21.9505	34.0896	0.971162	3.43016	8.0618	23.7059	1.50086	182.853	6.14125	0.537117	5.03823		2.76687	279.021		9.46655	39.3233	0.25409	5.2887	0.748717	5.3891	45.0385	1.28637	0.0417842		69.1586	1789.52	23.3304	3.28053	7.14109	98.4406	3.55941		7.77747	5.78013	11.4696	26.1098		1.53865	53.5555	4.52221	93.9337	0.0870729
Set782	38.5003	20.3646	47.6499	30.1332		23.9359	21.9763	29.282	0.982369	3.72627	7.39543	12.3101	1.19983	178.796	10.4495	0.537117	18.6882	10.7767	2.76687			9.46655	36.1001	0.230555	5.9569	0.92433	5.4126	16.8122	2.6032	0.072128		70.91	408.271	17.702	3.05974	2.01107	30.6617	2.70553		16.82	5.78013	8.58981	40.687		0.408836	70.6365	5.69468	83.0284	0.0733301
Set783	35.174	38.6049	48.5531	14.7018		23.5144	21.9763	31.9261	0.980235	5.38904	7.59344	7.63173	1.49295	183.913	6.49766	0.50709	14.1954	10.7767	14.9686			7.11904		0.213599	5.83287	1.42014	4.81939	46.2461	1.28637	0.045656		69.1586	408.271	17.757	3.99359	7.14109	29.2963	3.39892	249.277	7.79658	5.79144	8.43289	8.21714		0.657648	71.472	9.21028		0.0870729
Set784	35.174	26.4087	46.8896	36.7476		26.3399	20.7764	34.0896	0.927279	2.76867	9.14423	16.9885	3.69928	182.853	10.4495	0.398109	14.1954		2.76687		266.343	7.78599	39.3233	0.213599	3.21069	0.953044	4.0084	15.0673	2.54361	0.0351795		250.664		23.3304	4.84488	2.01107	29.2963	5.18658	53.7439	7.95833	5.63981	10.0723	36.0389		1.93322	14.4007	3.32539	26.2761	0.0733301
Set785	35.174	6.43539	25.938	30.1332		22.9963	20.7764	33.1195	0.977652	2.76867	4.38824	12.3101	1.17614	178.796	7.71052	0.616071	10.1951		4.17057	300.113	46.7608	7.11904		0.213599	6.42234	0.748717	4.66134	51.4158	1.28637	0.0251246		69.1586	1789.52	24.5768	3.99359	2.01107	31.0441	2.70553	115.109	7.79658	5.78013	8.43289	31.576		0.408836	19.9756	4.40396	108.322	0.0878502
Set786	45.8086	6.43539	31.5962	14.7018		26.3399	20.7764	33.841	0.942191	4.03738	7.59344	12.3101	1.19983	182.853	7.33111	0.616071	5.03823	10.7767	12.5187		79.0718	7.11904	36.1001	0.208484	5.9569	1.15737	4.0084	18.3379	1.28637	0.0302683	221.347	220.36		23.3304	5.21549	13.1817	26.7772	4.96656	115.109	7.79658	5.63981	11.3894	31.7851		0.408836	19.9756	3.32539	93.9337	0.0858704
Set787		28.6497	31.5962	30.2121		22.9963	21.9763	29.282	0.784323	7.52104	8.07451	12.3101	1.19983	69.3526	3.40529	0.537117	14.1954		8.85429	279.021		9.01195		0.294582	5.2887	0.748717	4.0084	16.8122	1.26566	0.0402038		70.91	408.271	23.3304	3.64917	11.097	75.3275	2.70553	53.7439	7.75641	5.80275	10.8707	27.6427		0.408836	21.8759	4.40396	88.2577	0.0733301
Set788	46.3685	28.7192	31.5962	14.7018		26.2264	22.8749	32.2555	0.863257	5.22704	8.69694	16.2568	1.23708	69.3526	6.14125	0.398109	14.1954		2.76687			7.78599		0.213599	8.96992	1.15737	2.4026	31.7513	2.36562	0.0402038	221.347	69.1586	1190.86	24.5768	3.64917	6.9524	30.6617	3.91301	53.7439	8.8037	5.78013	8.43289	31.7851		1.97223	63.2772	2.88527	88.2577	0.0858704
Set789	35.174	28.6497	41.8543	30.1919		26.3399	20.7764	38.4968	0.977652	2.76867	8.07451	16.9885	1.49295	228.828	11.0779	0.477056	5.03823		2.76687		79.0718	9.46655	39.3233	0.208484	3.21069	1.40399	4.48387	18.3379	1.26566	0.0433572	221.347	70.91	1190.86	17.8968	3.64917	8.16582	31.0441	3.77702	115.109	11.7677	5.78013	6.976	6.53812		0.408836	19.9756	3.32539	26.2761	0.0810281
Set790	44.6829	37.9099	21.7895	31.2074		23.5144	20.7764	31.9261	0.850156	5.22704	5.89184	12.3101	1.19983	69.3526	3.40529	0.477056	14.1954		7.22234	279.021		7.11904		0.294582	8.68369	1.46491	4.0084	46.3875	1.26566	0.0251246		69.1586		17.757	3.84608	7.25912	26.7772	2.6803	233.102	8.8037	5.78013	8.43289	8.21714		1.93322	14.4007	2.88527	116.483	0.0844382
Set791			31.5962	14.7018		24.5801	20.7764	32.3979	1.158	3.43016	7.49444	15.897	1.23708	182.853	3.99419	0.398109	5.03823		4.17057		46.7608	10.9619	36.1001	0.470466	5.2887	0.748717	4.17741	41.0638	2.36562	0.0402038	147.759	70.0343	1190.86	17.8968	3.84608	13.2034	66.6309	3.39892	53.7439	7.79658	5.78013	10.8707	39.8722		0.408836	21.8759	4.52221	83.0284	0.0870369
Set792	275.957	25.0538	31.3097	19.9357		24.2355	21.9763	33.1195	0.977652	3.72627	7.42665	15.897	3.69928	69.3526	6.72864	0.398109	14.1954	10.7767	2.76687	466.629	266.343	9.51294	36.1001	0.208484	7.99711	1.42014	2.4026	18.3379	2.42025	0.0402038	147.759	69.1586		17.757	3.81162	7.32979	25.652	2.6803	115.109	7.66008	5.79144	10.7653	27.6427		0.817671	53.5555	2.88527	116.483	0.0844279
Set793	35.174	20.3646	28.1715	14.7018		22.9963	22.8749	44.9554	0.977652	3.72627	7.49444	7.63173	1.19983	69.3526	8.36604	0.724461	16.3865		2.76687		46.7608	7.11904	36.1001	0.208484	5.9569	1.15737	4.0084	15.0673	1.26566	0.0251246		69.1586		31.0372	3.64917	7.32979	30.6617	2.6803		7.44635	5.78629	12.6891	8.21714		1.32948	14.4007	2.88527	48.4976	0.0733301
Set794	41.5916	37.9099	31.5962	14.7018		26.3399	20.7764	32.3979	0.863257	1.4214	7.49444	16.2568	3.69928	182.853	10.9182	0.398109	14.1954		2.76687	359.238		7.11904	37.8822	0.208484	5.2887	0.92433	4.0084	16.0376	1.26566	0.0351795		69.1586	408.271	23.0654	4.27732	6.9524	29.2963	2.6803	53.7439	7.79658	4.72465	8.58981	8.21714		1.93322	14.4007	4.40396	73.1132	0.0733301
Set795		28.6497	21.7895	31.2074		22.9963	22.8327	33.1195	0.977652	3.72627	7.59344	18.336	1.17614	119.353	8.28076	0.537117	5.03823		10.7588			9.46655	36.1001	0.208484	3.21069	0.748717	4.66134	50.386	2.54951	0.0302683	221.347	69.1586	408.271	21.0022	3.64917	5.9043	73.1548	2.6803	179.624	7.95833	5.80275	6.976	6.53812		0.817671	19.9756	7.19645	135.867	0.0844382
Set796		28.7192	31.5962	18.2062		23.5144	26.0828	22.9363	0.977652	3.72627	6.97391	7.63173	1.19983	69.3526	7.21268	0.878072	14.1954		12.4877		79.0718	10.1156	36.1001	0.25409	5.83287	0.92433	4.66134	16.8122	1.26566	0.0351795		70.91		29.6678	3.70794	2.01107	66.6309	2.6803	61.2994	7.79658	6.16914	7.47142	8.21714		0.817671	40.4402	6.80712	46.0807	0.0844382
Set797	35.174	6.43539	30.8685	18.2062		21.4978	20.7764	46.0037	0.942191	4.43494	5.42082	7.63173	1.19983	173.678	8.28076	0.756352	19.3977	10.7767	12.7694		84.6622	7.78599	37.8822	0.213599	5.83287	1.15737	2.4026	45.0385	1.28637	0.0351795		69.1586		17.8968	3.64917	2.01107	26.7772	2.70553	231.932	7.65687	5.63981	7.47142	28.3715		0.657648	14.4007	5.00636	93.9337	0.0844382
Set798	38.5003	28.7192	48.5531	18.2062		28.7905	22.6611	16.2027	0.977652	3.43016	7.59344	23.7059	1.23708	183.913	6.02126	0.616071	10.1951		10.7588			9.46655	36.1001	0.230555	10.5534	1.15737	5.18696	23.8984	2.36562	0.0351795		69.1586	408.271	17.702	3.81162	6.9524	25.652	2.6803	282.847	9.44459	5.79144	6.976	26.1098		1.71384	35.3216	5.69468	88.2577	0.0844382
Set799	29.3093	28.7192	59.4655	14.7018		26.2264	26.246	34.0896	0.977652	3.72627	7.39543	7.63173	1.19983	173.678	6.14125	0.537117	18.2931		2.76687			9.46655		0.208484	5.9569	1.59568	5.4126	15.0673	1.83219	0.0543341		220.36	408.271	29.6514	3.99359	8.16582	26.7772	2.70553	115.109	7.79658	5.78013	7.45952	6.53812		0.408836	14.4007	5.69468	103.158	0.0895017
Set800	36.8207	6.43539	21.7895	18.2062		26.2264	21.9763	32.2555	0.863257	3.43016	7.73497	16.2568	1.17614	183.913	7.21268	0.477056	18.6347		12.4877		46.7608	10.8097	37.8822	0.294582	8.68369	0.748717	4.17741	32.291	1.26566	0.0402038	221.347	171.69		30.5607	3.28053	5.9043	30.6617	2.6803	231.932	7.66008	5.63981	8.43289	6.53812		3.02305	19.9756	2.88527	48.4976	0.0733301
Set801		20.3646	64.0427	37.5903		26.3399	20.7764	33.1195	0.971162	5.38904	7.59344	29.2052	1.49295	173.678	6.72864	0.616071	12.3961	10.7767	8.85429			7.11904	36.1001	0.427333	3.21069	1.18812	5.61221	34.0688	1.26566	0.045656		70.0343	408.271	22.7586	4.01121	8.16582	25.652	3.81476	282.847	7.66008	5.80275	8.43289	6.53812		2.35915	14.4007	5.5812	73.1132	0.0733301
Set802		6.43539	21.7895	14.7018		24.9872	22.8327	33.1195	0.942191	4.7652	7.49444	17.9295	5.58206	119.883	8.28076	0.398109	14.1954		2.76687	279.021	266.343	7.11904		0.230555	3.21069	1.18812	4.48387	16.0376	2.46969	0.0302683		69.1586		17.757	3.70794	2.01107	30.6617	2.70553	115.109	7.95833	5.78629	6.976	31.7851		0.408836	63.2772	4.40396	46.0807	0.0870369
Set803	47.3299	6.43539	21.7895	27.1919		23.5144	20.7764	33.1195	0.863257	5.94591	7.59344	7.63173	1.50086	69.3526	8.28076	0.616071	5.03823		2.76687	279.021	266.343	7.78599	37.8822	0.230555	5.83287	1.15737	2.4026	32.291	1.26566	0.0435683		69.1586		21.0022	2.05776	2.01107	66.6309	5.42564	115.109	11.7677	5.79144	10.0723	26.1098		0.646661	14.4007	5.69468	76.8624	0.0791169
Set804	41.5916	20.3646	30.8685	29.6301		24.2355	21.9763	32.3979	0.980235	3.72627	8.07451	15.897	6.06591	221.206	8.36604	1.01092	10.1951		10.7588		79.0718	9.01195	36.1001	0.208484	8.96992	0.748717	5.3891	16.8122	2.54361	0.0302683	147.759	69.1586		17.8968	3.64917	6.9524	31.0441	3.75541	115.109	8.91785	5.78013	9.61248	26.1098		0.408836	53.5555	2.88527	88.2577	0.0733301
Set805			21.7895	29.8144		24.5217	22.8327	34.0896	0.927279	3.72627	7.49444	7.63173	1.19983	69.3526	6.72864	0.537117	14.1954		2.69315			9.46655	36.1001	0.208484	3.21069	1.15737	4.17741	49.0132	1.26566	0.0302683		69.1586	1190.86	17.757	3.81162	8.16582	56.8627	2.72223	53.7439	8.8037	5.80275	6.976	26.1098		0.408836	19.9756	2.88527	58.4128	0.0733301
Set806	35.174	36.2953	25.938	18.2062		23.2586	20.7764	29.282	0.942191	3.57822	7.39543	15.897	1.23708	173.678	9.64394	0.50709	14.2625		10.2107			9.55932		0.294582	5.83287	0.748717	4.17741	41.0638	2.46969	0.0435683	211.245	250.664		17.757	4.06172	9.66575	29.2963	2.6803	53.7439	7.79658	4.72465	7.47142	28.3715		0.646661	14.4007	8.51581	46.0807	0.0733301
Set807	35.174		20.709	14.7018		23.2586	23.7044	50.0701	0.980235	3.43016	7.59344	7.63173	1.17614	69.3526	6.14125	0.686211	5.03823		8.09591		79.0718	7.11904	36.1001	0.294582	5.9569	1.40399	5.4126	41.0638	1.28637	0.045656		220.36		21.0022	3.99359	2.01107	30.6617	2.6803	89.2895	2.95501	5.79144	8.58981	26.1098		1.93322	19.9756	2.88527	58.4128	0.0870729
Set808	45.8086	38.6049	21.7895	31.2074		26.3399	22.6611	33.841	0.927279	1.4214	7.49444	12.3101	1.19983	69.3526	8.36604	0.403903	18.2931		7.22234	279.021	266.343	7.11904	36.1001	0.208484	9.61854	0.748717	5.79787	15.0673	2.38351	0.0302683		71.9155	408.271	17.702	3.70794	7.32979	26.7772	2.6803	53.7439	9.44459	5.78013	6.976	8.21714		0.408836	17.732	3.32539	31.0842	0.0733301
Set809	251.958	6.43539	31.5962	18.2062		23.9359	25.1042	32.6782	0.977652	3.43016	7.39543	7.63173	1.73818	259.558	5.1065	0.395367	20.7572		2.76687		46.7608	7.78599	36.1001	0.208484	8.62603	1.15737	4.48387	35.7672	1.26566	0.0385853	221.347	69.1586	408.271	23.0654	4.09176	5.9043	46.5125	4.2666	100.547	8.91785	4.72465	7.47142	31.576		0.657648	62.6281	6.95479	26.2761	0.0858704
Set810		6.43539	48.1469	18.2062		24.5801	26.0828	32.9922	0.863257	3.72627	5.89184	15.897	5.58206	69.3526	8.60957	0.616071	14.1954		4.17057	279.021	46.7608	7.11904		0.230555	5.83287	1.18812	4.0084	46.2461	2.6032	0.0251246	221.347	69.1586		24.5768	4.33921	6.9524	26.7772	2.70553	115.109	11.0926	5.63981	6.976	6.53812		0.408836	21.8759	2.88527	38.5825	0.0844382
Set811	38.5003	38.6049	21.7895	18.2062		21.4978	22.6611	32.9922	1.01063	2.76867	8.28544	15.897	1.49295	119.353	6.14125	0.537117	10.1951		2.76687	300.113		9.46655	39.3233	0.294582	8.68369	1.15737	5.61221	16.8122	1.28637	0.0351795	221.347	69.1586		27.615	4.51622	7.32979	29.2963	2.6803	53.7439	7.87746	5.78013	10.254	28.3715		2.06332	19.9756	7.19645	31.0842	0.0733301
Set812	251.958	6.43539	30.8685	34.968		22.9963	21.9763	33.1195	0.850156	5.43159	7.46054	15.897	4.74873	183.913	8.60957	0.477056	14.1954		8.85429		46.7608	7.11904		0.208484	6.42234	0.92433	4.48387	15.0673	1.28637	0.0433572	211.245	164.731		29.6678	4.27732	13.16	25.652	3.75541	233.102	7.79658	6.3335	10.0723	36.0389		0.408836	19.9756	3.32539	75.305	0.0807134
Set813	67.3085	20.3646	21.7895	40.7624		29.248	22.8749	34.0896	1.158	3.43016	8.28544	15.897	3.69928	182.853	6.14125	0.398109	20.7572		2.76687	279.021		7.11904		0.294582	3.21069	0.92433	5.79787	16.0376	1.28637	0.0417842	221.347	70.0343		24.5768	3.64917	10.7939	29.2963	2.6803	53.7439	11.0926	5.79144	10.254	26.1098		1.53865	84.2224	8.51581	86.3744	0.0733301
Set814	38.5003	20.3646	28.1715	14.7018		23.165	22.6611	29.282	0.977652	3.86287	7.59344	12.3101	1.19983	178.796	8.36604	0.46671	17.9346	10.7767	2.76687		46.7608	7.11904	39.3233	0.208484	5.2887	0.92433	4.0084	10.7516	2.36562	0.0417842		70.91		25.1286	3.64917	5.9043	66.6309	3.77702	176.809	8.8037	6.10755	8.43289	36.0389		0.408836	17.732	2.88527	26.2761	0.0844382
Set815	35.174	26.9198	31.3097	18.2062		26.2264	20.7764	28.024	0.549093	7.11592	7.51004	23.7059		173.678	7.33111	0.395367	18.7971		2.76687	279.021	79.0718	7.78599	36.1001	0.208484	5.2887	0.748717	4.98034	16.0376	2.46969	0.0402038		71.9155	1190.86	17.8968	4.58302	2.01107	85.8889	2.6803	179.624	12.1411	5.79144	11.4696	8.21714		0.408836	14.4007	2.88527	58.4128	0.0895017
Set816		6.43539	21.7895	18.2062		22.9963	22.8327	32.2555	0.971162	3.43016	7.49444	16.2568	1.23708	69.3526	6.95962	0.398109	14.1954		12.1307	279.021		7.78599	36.1001	0.208484	10.001	0.748717	2.4026	16.0376	1.28637	0.0351795		69.1586	1190.86	26.395	3.75932	9.66449	29.2963	4.2666		8.91785	5.80275	10.254	27.6427		0.408836	62.6281	4.52221	46.0807	0.0858704
Set817	45.2487	25.8976	48.1469	18.2062		26.3399	25.1042	49.045	0.982369	4.70088	7.49444	16.729	1.23708	173.678	7.21268	1.12845	12.3961		13.8869			7.78599	36.1001	0.294582	3.21069	1.15737	4.17741	78.0119	2.36562	0.0402038	221.347	69.1586		29.2034	3.64917	2.01107	76.5999	5.42564	179.624	7.79658	5.78629	10.0723	31.7851		0.657648	21.8759	7.19645	58.4128	0.0733301
Set818	67.3085	6.43539	30.8685	14.7018		24.3853	21.9763	38.4968	0.980235	3.43016	7.49444	16.2568	1.73818	183.913	8.28076	0.616071	14.1954		4.17057		46.7608	11.8166	37.8822	0.208484	8.68369	1.15737	4.17741	15.0673	1.28637	0.0402038		69.1586	1190.86	24.5768	3.28053	2.01107	25.652	2.68945	268.201	7.79658	5.79144	10.8707	6.53812		0.408836	40.4402	3.32539	38.5825	0.0733301
Set819	36.8207	37.9099	28.1715	18.2062		24.5801	21.9763	33.841	0.942191	4.55765	7.46054	12.3101	1.17614	183.913	6.02126	0.398109	14.1954		12.7515		266.343	9.46655	39.3233	0.213599	5.83287	1.29581	4.66134	27.3477	2.32823	0.0251246	147.759	69.1586		28.2983	4.27732	6.9524	29.2963	2.68945	231.932	7.79658	5.78629	10.4431	8.21714		2.11645	62.6281	2.88527	58.4128	0.0733301
Set820	46.3685	88.5187	21.7895	14.7018		26.2264	21.9763	39.8408	0.863257	4.70088	7.59344	16.6425		69.3526	6.14125	0.398109	10.1951		8.09591	279.021		7.11904		0.208484	8.72541	1.18812	4.17741	16.0376	2.6032	0.0402038		69.1586		23.3304	3.64917	5.9043	30.6617	2.6803	53.7439	7.72673	4.72465	10.0723	8.21714		1.97223	43.1557	8.82201	130.436	0.0733301
Set821	45.2487	26.4087	39.9299	30.2121		26.2264	21.9763	32.3979	1.158	4.70088	8.05974	15.897	1.17614	253.726	6.02126	0.46671	5.03823		9.50883			7.78599	39.3233	0.208484	8.96992	0.748717	4.0084	47.7364	2.41969	0.0402038				22.7586	3.99359	2.01107	29.2963	3.81476	179.624	7.79658	5.51173	7.47142	26.1098		0.657648	14.4007	7.95271	46.0807	0.0733301
Set822	251.958		41.8543	18.2062		26.3399	20.7764	16.2027	0.549093	3.43016	7.39543	25.2613	3.69928	69.3526	6.14125	0.686211	15.6379		10.2107		266.343	7.11904	37.8822	0.230555	8.91495	0.748717	4.17741	16.8122	1.83219	0.0251246	147.759	69.1586		17.757	2.05776	10.566	48.1872	4.96656	188.202	12.3873	6.3335	10.254	6.53812		1.71384	63.2772	2.88527	88.2577	0.0864537
Set823		6.43539	25.938	36.1487		23.7752	24.7586	28.024	0.977652	4.70088	7.49444	16.729	1.17614	183.383	6.14125	0.398109	21.291		9.43942	279.021	79.0718	9.46655	36.1001	0.260688	5.83287	0.748717	4.0084	23.8984	1.83219	0.0565236	221.347	69.1586	1190.86	21.0022	4.33921	2.01107	30.6617	2.68945	231.932	7.4674	6.2988	7.45952	6.53812		1.53865	40.4402	3.32539	86.3744	0.0844382
Set824	43.98	6.43539	31.5962	18.2062		26.3399	20.7764	25.4157	0.977652	3.43016	8.94294	7.63173	5.56411	228.828	9.64394	0.477056	5.03823	10.7767	2.76687		84.6622	9.23735		0.208484	8.68369	0.748717	2.4026	31.7513	2.54951	0.0351795	147.759	78.1269	408.271	25.1286	3.64917	7.29413	25.652	2.6803	53.7439	12.1411	5.78013	10.3087	8.21714		2.11645	19.9756	5.00636	26.2761	0.0733301
Set825	48.2912	28.6497	54.2987	30.2121		23.9359	25.1042	39.1416	0.784323	4.70088	7.59344	16.2568	5.22166	267.18	6.95962	0.616071	5.03823		2.76687		79.0718	7.11904		0.208484	9.44137	1.18812	2.4026	16.0376	2.42025	0.0417842		212.423		17.702	3.70794	5.9043	25.652	2.72223	53.7439	7.95833	5.51173	8.43289	8.21714		1.57553	14.4007	5.5812	93.9337	0.0804162
Set826	41.5916	20.3646	48.1469	30.2121		25.5668	22.6611	33.1195	0.850156	3.43016	7.59344	16.2568	1.50086	69.3526	6.14125	0.398109	5.03823		2.76687		46.7608	7.78599		0.427333	5.9569	0.92433	4.0084	23.8984	1.26566	0.0351795	211.245	70.91		30.5607	3.64917	5.9043	56.8627	2.6803	186.621	9.44459	5.79144	10.7653	27.6427		0.817671	19.9756	3.32539	26.2761	0.0733301
Set827	35.174	28.6497	21.7895	14.7018		22.9963	27.0558	33.1195	0.850156	3.43016	6.97391	16.2568	1.29945	69.3526	5.1065	0.756352	10.1951		2.61943		266.343	9.46655		0.208484	6.42234	1.15737	2.4026	16.0376	2.28896	0.064592		70.91	1190.86	17.702	3.28053	2.01107	48.1872	2.68945	245.125	7.95833	5.63981	10.7653	24.7138		0.408836	44.1059	2.88527	38.5825	0.0733301
Set828	47.3299	20.3646	21.7895	14.7018		26.3399	20.7764	34.0896	0.977652	5.89921	7.49444	7.63173	1.19983	69.3526	3.99419	0.398109	8.99574	10.7767	4.17057		84.6622	9.55932	39.3233	0.294582	3.21069	0.92433	4.48387	16.8122	2.12622	0.0351795		69.1586		17.8968	3.28053	6.9524	30.6617	2.6803	53.7439	7.79658	5.79144	10.8707	26.1098		0.408836	66.3359	4.52221	38.5825	0.0733301
Set829	41.5916	20.3646	48.1469	19.9357		25.2309	25.1042	34.0896	1.158	3.72627	7.42665	16.2568	1.50086	69.3526	8.36604	0.50709	8.99574		2.76687	279.021	266.343	9.46655	37.8822	0.230555	8.68369	0.748717	4.17741	23.8984	2.60502	0.0351795		70.0343	1190.86	17.702	3.99359	5.9043	63.2736	2.70553	181.018	7.79658	5.78013	10.4431	8.21714		1.97862	73.7341	4.40396	38.5825	0.08697
Set830	124.325	38.6049	25.3164	18.2062		23.5144	20.7764	46.0037	0.863257	3.72627	7.46054	12.3101	1.19983	69.3526	14.1719	0.477056	18.6115		9.43511	279.021		10.9619		0.208484	5.83287	1.05622	4.33288	68.5938	1.72338	0.0351795		69.1586		23.3304	4.41164	6.9524	29.2963	2.6803	53.7439	7.65687	5.79144	9.61248	26.1098		1.57553	40.4402	4.52221	58.4128	0.0870369
Set831	124.325	28.7192	56.0511	18.2062		26.2264	20.7764	33.841	0.784323	3.43016	8.98767	12.3101	1.19983	69.3526	6.14125	0.616071	19.3977		8.85429	279.021		11.1001	37.8822	0.213599	7.32029	1.58113	4.48387	41.0638	1.28637	0.0565236		171.69	1190.86	17.757	3.99359	5.9043	26.7772	5.56536	53.7439	10.0265	5.79144	10.254	22.0189		2.02031	40.4402	6.80712	83.0284	0.0844382
Set832	29.3093	6.43539	48.1469	14.7018		23.9359	22.6611	38.4968	0.980235	3.43016	8.2461	7.63173	2.1769	173.678	7.21268	0.756352	5.03823		4.17057			7.78599	36.1001	0.208484	3.21069	0.748717	4.49711	41.0638	1.00072	0.0402038	147.759	69.1586		17.702	3.64917	2.01107	30.6617	4.2666	115.109	7.72673	5.51173	10.254	31.576		1.82755	64.9114	4.52221	58.0988	0.0878502
Set833	45.5257	20.3646	67.1535	14.7018		26.2264	21.9763	33.841	0.850156	3.77719	7.41104	16.2568	1.49295	182.853	6.02126	0.398109	5.03823		2.76687		79.0718	7.11904		0.821634	5.83287	0.748717	4.0084	18.3379	2.12622	0.0351795	147.759	70.0343	408.271	17.702	3.05974	8.16582	73.1548	4.23061	115.109	7.79658	5.78013	8.43289	8.21714		1.71384	21.8759	4.52221	38.5825	0.0858704
Set834	251.958	6.43539	21.7895	18.2062		32.5106	22.6611	28.024	0.977652	3.72627	5.94134	16.2568	1.17614	119.883	6.14125	0.395367	10.1951		2.76687	279.021	46.7608	10.7319		0.343061	6.42234	0.748717	2.4026	16.0376	2.42025	0.0351795		69.1586		17.757	3.70794	10.1136	56.8627	5.18658	231.932	7.79658	5.80275	10.0723	26.1098		0.817671	19.9756	2.88527	38.5825	0.0733301
Set835	35.174		42.1113	19.9357		26.2264	20.7764	34.0896	1.02615	3.43016	7.49444	15.897	1.17614	245.804	6.14125	0.616071	10.1951	10.7767	8.85429			14.6803	36.1001	0.427333	5.83287	0.92433	5.4126	15.0673	1.26566	0.0417842		70.91	1789.52	17.702	3.84608	6.9524	48.1872	3.91301	53.7439	8.8037	5.78013	10.3087	39.8722		0.408836	66.3359	4.92448	83.0284	0.0733301
Set836	251.958	20.3646	59.2747	30.2121		25.2309	30.2903	34.0896	1.01846	5.22704	7.46054	15.897	1.23708	182.853	6.95962	0.46671	14.1954		10.7588		79.0718	10.7319	36.1001	0.294582	5.2887	0.748717	4.17741	16.0376	2.41969	0.0402038	147.759	69.1586		17.8968	3.84608	7.32979	29.2963	2.70553	231.932	8.91785	5.78013	7.44762	8.21714		0.408836	14.4007	5.94457	88.2577	0.0844382
Set837		28.6497	30.8685	18.2062		28.9467	20.7764	32.6782	0.784323	2.76867	8.07451	7.63173	1.19983	69.3526	12.426	0.398109	5.03823		2.61943		79.0718	10.7319	37.8822	0.208484	5.9569	0.92433	4.48387	10.7516	1.26566	0.0417842	221.347	212.423	1190.86	21.0022	4.27732	6.9524	31.0441	4.2666	268.201	7.79658	5.80275	8.43289	6.53812		1.05943	40.4402	4.40396	83.0284	0.0733301
Set838	35.174	28.7192	64.8466	18.2062		29.248	20.7764	32.2555	0.784323	3.43016	9.28229	16.2568	3.69928	173.678	6.49766	0.395367	12.3961		4.17057		266.343	7.11904		0.208484	7.32029	0.748717	2.4026	48.3215	1.26566	0.0482119	147.759	69.1586	1190.86	22.7586	3.28053	2.01107	29.2963	4.23061	115.109	7.87746	5.63981	10.4431	26.1098		0.408836	14.4007	5.69468	26.2761	0.0733301
Set839	29.3093	6.43539	32.1292	14.7018		25.2309	20.7764	31.9261	0.784323	2.76867	8.80194	16.9885	1.50086	69.3526	7.21268	0.398109	14.1954		2.76687	325.79		10.7319	37.8822	0.230555	3.21069	0.953044	5.41668	23.8984	2.23818	0.045656		69.1586		23.3304	3.64917	7.32979	25.652	2.68945	268.201	7.95833	5.78013	7.45952	26.1098		0.657648	14.4007	4.52221	93.9337	0.0733301
Set840	38.5003	28.7192	31.5962	14.7018		26.2264	22.6611	32.9922	0.977652	3.43016	7.42665	22.5511	1.49295	69.3526	6.14125	0.398109	10.1951	10.7767	7.14862		266.343	9.46655	39.3233	0.208484	3.21069	1.15737	6.05945	15.0673	2.55123	0.0302683		69.1586	408.271	17.757	4.4242	6.9524	29.2963	4.2666	231.932	7.65687	5.63981	5.10641	27.6427		0.408836	19.9756	2.88527	46.0807	0.0733301
Set841		20.3646	28.1715	14.7018		22.9963	23.7044	29.282	0.980235	3.43016	7.39543	7.63173	1.23708	253.726	7.33111	0.537117	14.1954	10.7767	12.7515			7.78599	36.1001	0.294582	9.44137	1.39249	4.66134	27.3477	2.55123	0.0351795	211.245	69.1586	408.271	37.4729	3.28053	2.01107	30.6617	3.81476	231.932	7.65687	5.78013	14.2729	8.21714		0.408836	63.2772	2.88527	58.4128	0.0844382
Set842	44.6829	33.4449	57.0274	14.7018		22.9963	21.9763	33.1195	0.977652	2.76867	7.59344	43.7841	1.50086	69.3526	8.0922	0.398109	21.5971		8.09591	325.79		7.11904		0.25409	8.91495	0.748717	5.3891	23.8984	2.54702	0.0402038		70.91		17.8968	3.99359	9.66449	58.5222	2.70553	231.932	15.2608	5.78013	10.254	36.0389		0.408836	14.4007	4.40396		0.0844382
Set843	35.174	6.43539	31.3097	30.2121		26.7417	25.4361	29.282	1.2055	3.43016	8.29055	7.63173	1.19983	69.3526	8.36604	0.616071	16.6789		2.76687		46.7608	9.46655	36.1001	0.208484	5.9569	1.15737	2.4026	15.0673	2.12622	0.0251246		220.36	1190.86	28.2983	3.70794	6.9524	29.2963	4.23061	77.02	8.57751	5.78013	8.43289	39.8722		0.408836	43.1557	2.88527	75.305	0.0733301
Set844	171.633	20.3646	59.4871	14.7018		21.4978	18.7967	25.4157	0.942191	3.77719	6.92441	7.63173	1.19983	173.678	8.60957	0.398109	12.3961		4.33957		79.0718	10.1156	36.1001	0.374761	3.21069	0.748717	4.17741	16.0376	1.26566	0.0251246		69.1586	1190.86	28.2054	4.27732	6.9524	30.6617	5.72254	179.624	7.65687	4.72465	10.254	27.6427		0.408836	66.3359	3.32539	76.8624	0.0878502
Set845	36.8207	28.7192	21.7895	18.2062		26.3399	25.4361	32.2555	0.982369	5.38904	7.59344	7.63173	1.73818	173.678	5.30405	0.398109	18.6347		11.6778	279.021		7.11904	37.8822	0.208484	5.83287	0.748717	4.17741	16.8122	2.42025	0.0251246		69.1586		17.8968	5.01382	5.9043	48.1872	5.42564	98.0799	7.87746	5.63981	10.8707	26.1098		3.02305	14.4007	4.40396	81.7814	0.0733301
Set846			31.5962	31.0361		21.9528	26.0828	26.974	0.784323	6.07134	7.49444	7.63173	1.50086	69.3526	10.4495	0.616071	14.1954		7.22234	279.021	46.7608	7.11904		0.374761	6.42234	0.92433	5.75339	43.9437	1.26566	0.0402038	221.347	212.423	1190.86	26.395	3.99359	2.01107	26.7772	2.6803	231.932	8.8037	5.80275	10.0723	26.1098		0.657648	19.9756	3.32539	26.2761	0.0733301
Set847	46.3685	20.3646	21.7895	34.968		28.2743	26.246	34.0896	1.02615	2.76867	6.45339	16.2568	1.17614	69.3526	7.71052	0.395367	14.2625		2.69315			9.23735	36.1001	0.470466	8.85246	0.748717	4.0084	15.0673	2.42025	0.045656		71.9155	1789.52	26.395	3.99359	7.32979	29.2963	3.55941		11.0926	6.10755	6.976	6.53812		0.657648	14.4007	5.46381	130.436	0.0844382
Set848	39.9284	20.3646	21.7895	14.7018		29.248	23.7044	33.2478	1.02615	3.43016	7.49444	16.6425	1.49295	173.678	5.1065	0.537117	10.1951		10.7588			10.8238	36.1001	0.374761	5.83287	1.15737	4.66134	23.8984	2.54361	0.0351795		69.1586		28.506	3.99359	2.01107	29.2963	2.68945	231.932	8.91785	4.72465	10.0723	22.0189		0.817671	14.4007	4.92448	93.9337	0.0870369
Set849	37.8389	20.3646	42.1696	31.9698		22.9963	21.9763	49.1357	0.977652	5.94591	5.94134	12.3101	1.19983	178.796	8.28076	0.537117	10.1951	10.7767	10.7588		266.343	10.688	37.8822	0.208484	3.21069	0.748717	5.4126	15.0673	1.26566	0.0302683	147.759	70.91	408.271	17.757	3.99359	2.01107	31.0441	2.6803	53.7439	7.79658	5.80275	10.7653	31.7851		0.408836	14.4007	5.94457	48.4976	0.0844382
Set850	35.174	26.9198	31.5962	31.2074		24.2355	21.9763	34.0896	0.942191	4.7652	7.49444	15.897	4.84602	183.913	8.60957	0.398109	10.1951		13.0007			10.7319		0.230555	8.96992	0.953044	4.17741	15.0673	1.26566	0.0417842		69.1586		27.6849	4.06172	7.14109	29.2963	2.70553	231.932	8.57751	5.79144	8.43289	8.21714		0.657648	14.4007	4.53049	69.3641	0.0844382
Set851	275.957	6.43539	21.7895	14.7018		26.3399	22.6611	29.282	0.977652	3.72627	7.49444	29.2052	1.49295	173.678	7.78936	0.616071	5.03823	10.7767	10.7588		79.0718	7.11904	36.1001	0.208484	5.83287	1.05622	4.66134	16.8122	1.26566	0.0302683		70.91		21.0022	3.70794	2.01107	75.3275	2.70553	115.109	7.95833	5.51173	8.58981	8.21714		2.49195	14.4007	2.88527	58.0988	0.0840325
Set852		6.43539	31.3097	30.1332		27.7372	27.0558	28.024	0.980235	5.50261	8.07451	16.2568	4.84602	69.3526	8.28076	0.537117	18.6882	10.7767	2.76687		79.0718	7.90013	39.3233	0.208484	3.21069	1.18812	4.48387	34.0688	1.26566	0.0523979		69.1586		17.757	3.81162	7.32979	29.2963	5.42564	231.932	7.79658	8.14808	7.47142	6.53812		0.408836	40.4402	2.88527	58.0988	0.0733301
Set853	47.3299	38.6049	21.7895	19.9357		24.5217	21.9763	29.282	0.927279	2.76867	4.38824	16.6425	1.17614	173.678	9.2045	0.537117	14.2625		7.22234	279.021		8.38151		0.208484	7.99711	1.15737	2.4026	47.7364	2.55123	0.0302683	221.347	278.466		29.6678	3.70794	10.1136	26.7772	4.96656	231.932	10.0265	5.80275	6.39537	26.1098		0.408836	19.9756	3.32539	38.5825	0.0858704
Set854	45.5257	6.43539	25.938	14.7018		11.973	21.9763	38.4968	0.977652	3.43016	8.07451	15.897	1.23708	173.678	6.72864	0.686211	5.03823		7.83388	279.021		9.46655	36.1001	0.25409	5.2887	0.748717	4.0084	23.8984	1.26566	0.0251246	147.759	69.1586	408.271	21.0022	3.77153	2.01107	73.1548	3.39892		7.87746	5.78013	10.254	22.0189		0.817671	14.4007	3.32539	102.628	0.171775
Set855		20.3646	31.5962	14.7018		26.3399	22.6611	28.024	0.977652	3.72627	6.92441	12.3101	1.19983	69.3526	9.64394	0.398109	10.1951	10.7767	2.76687	300.113		7.78599	37.8822	0.294582	8.91495	1.56506	2.4026	16.8122	1.83219	0.0351795	147.759	69.1586	1190.86	27.615	3.28053	2.01107	29.2963	4.23061	177.672	7.95833	5.78013	10.8707	36.0389		0.657648	14.4007	3.32539	88.2577	0.0844279
Set856	29.3093	6.43539	31.5962	14.7018		26.2264	20.7764	34.0896	0.980235	6.30434	7.59344	26.8945	3.69928	182.853	7.71052	0.477056	5.03823	10.7767	2.76687	325.79		7.11904	37.8822	0.208484	5.2887	0.748717	2.4026	16.0376	2.54135	0.0302683	221.347	70.91	1789.52	31.6616	4.68606	2.01107	30.6617	3.39892	98.0799	7.95833	6.10755	7.45952	6.53812		0.657648	14.4007	5.69468	31.0842	0.0733301
Set857	35.174	26.9198	48.5531	31.2074		27.4722	22.6611	34.0896	0.977652	3.43016	7.59344	12.3101	1.19983	69.3526	6.02126	0.398109	10.1951		7.22234	279.021	266.343	7.11904	36.1001	0.213599	5.83287	0.92433	4.0084	72.7446	1.28637	0.0351795		212.423		28.2983	3.70794	2.01107	58.5222	5.18658	115.109	8.9603	5.80275	10.0723	31.576		0.408836	14.4007	3.32539	38.5825	0.0844382
Set858	275.957	36.4746	31.3097	19.9357		32.1634	20.7764	32.2555	1.07547	5.38904	7.49444	16.2568	1.17614	182.853	6.14125	0.959483	5.03823		13.2417		46.7608	10.8238		0.208484	3.21069	1.56506	4.0084	16.0376	2.55043	0.0453523		71.9155		21.0022	3.64917	2.01107	29.2963	4.96656		7.79658	4.72465	6.976	8.21714		1.57553	19.9756	5.69468	38.5825	0.0733301
Set859	45.8086	6.43539	48.1469	18.2062		19.2797	26.0828	33.1195	0.977652	3.43016	8.07451	7.63173	1.23708	183.913	6.49766	0.398109	12.3961	10.7767	12.4877			9.46655	39.3233	0.359521	8.62603	1.05622	2.4026	23.8984	1.26566	0.0351795	147.759	269.925		30.5607	3.28053	8.16582	29.2963	2.72223	115.109	7.87746	6.54667	7.44762	36.1513		0.408836	14.4007	3.32539	26.2761	0.0844382
Set860	251.958	6.43539	21.7895	19.9357		28.9467	22.6611	29.282	0.927279	3.43016	7.49444	16.729	4.80438	69.3526	6.14125	0.756352	12.3961		2.76687		79.0718	7.11904		0.208484	3.21069	0.748717	4.0084	16.7657	2.42025	0.0402038		69.1586	408.271	23.0654	3.64917	2.01107	62.3633	3.81476	115.109	7.65687	5.80275	6.976	45.5735		0.408836	35.3216	3.32539	83.0284	0.0870729
Set861		38.6049	42.1113	25.1027		23.9359	20.7764	32.6782	1.02615	3.43016	7.46054	16.9885	1.17614	69.3526	3.40529	1.25537	5.03823		2.76687	359.238	266.343	7.11904		0.213599	3.21069	1.15737	2.4026	23.8984	2.36562	0.0402038		70.91	408.271	23.3304	3.99359	2.01107	29.2963	2.70553	115.109	8.8037	5.79144	9.61248	31.7851		1.71384	62.6281	3.32539	26.2761	0.0844382
Set862	48.2912	36.2953	21.7895	18.2062		26.2264	20.5575	29.282	0.942191	5.13144	7.59344	16.2568	1.50086	182.853	7.21268	0.616071	19.3745		10.2107			10.8238	36.1001	0.230555	5.2887	1.90765	4.0084	16.0376	1.26566	0.0402038	147.759	70.91		21.0022	4.59169	6.9524	25.652	4.33844	115.109	7.4253	5.78629	5.10641	27.6427		0.657648	14.4007	5.69468	88.2577	0.0733301
Set863	67.3085	6.43539	24.2137	14.7018		23.5144	22.6611	33.1195	1.158	3.72627	7.42665	15.897	1.50086	182.853	12.3683	0.398109	14.1954		4.17057			7.78599		0.213599	8.68369	1.59546	4.17741	23.8984	2.41969	0.0543341	147.759	317.144	408.271	22.7586	3.70794	5.9043	26.7772	3.39892	115.109	7.77747	5.78013	8.58981	6.53812		2.28493	72.5115	4.92448	93.9337	0.0844382
Set864	48.2912	28.7192	31.5962	18.2062		11.973	23.9896	38.4968	1.07547	3.72627	5.89184	15.897	1.17614	69.3526	6.14125	0.46671	10.1951	10.7767	11.6778	300.113		7.11904	37.8822	0.208484	5.83287	0.748717	4.17741	45.0385	2.36562	0.0402038		69.1586	1789.52	17.702	4.4242	7.32979	66.6309	2.6803	115.109	7.72673	5.79144	7.44762	31.576		0.408836	14.4007	2.88527	93.9337	0.0791169
Set865	48.2912	6.43539	31.5962	31.2074		26.7417	21.9763	34.0896	0.977652	3.43016	7.59344	16.6425	1.17614	183.913	7.78936	0.46671	14.1954	10.7767	10.7588		79.0718	7.11904	39.3233	0.260688	8.81237	0.953044	4.66134	44.1707	2.25618	0.0302683	147.759	69.1586		26.395	3.99359	2.01107	30.6617	2.72223	53.7439	9.44459	6.3335	11.3894	8.21714		1.57553	71.472	4.52221	93.9337	0.0733301
Set866	35.174	20.3646	42.1113	27.1919		28.7905	22.8327	29.282	0.863257	3.86287	8.07451	15.897	1.17614	182.853	3.40529	0.878072	5.03823		9.50883		266.343	9.46655	36.1001	0.208484	5.2887	1.15737	4.17741	15.0673	1.83219	0.0351795		69.1586		30.5607	3.99359	6.9524	29.2963	2.68945	245.125	7.79658	4.72465	7.44762	6.53812		0.408836	62.6281	5.69468	58.0988	0.0895017
Set867	29.3093	28.6497	21.7895	38.8998		24.5801	22.8327	38.4968	0.977652	3.43016	8.07451	16.6425	4.84602	69.3526	7.78936	0.686211	19.3977	10.7767	4.33957			9.55932	36.1001	0.208484	5.61405	0.92433	4.0084	23.8984	2.36562	0.0467243		70.0343	1789.52	27.5875	3.77153	10.1136	31.0441	2.70553	53.7439	7.79658	6.54667	10.8707	8.21714		1.80375	19.9756	4.40396	58.0988	0.0844382
Set868		28.6497	31.3097	14.7018		23.9359	21.9763	22.9363	0.980235	2.76867	4.38824	12.3101	1.17614	178.796	8.28076	0.756352	14.1954		2.76687	279.021		7.11904		0.294582	5.83287	0.92433	5.08365	16.8122	2.46969	0.0251246		69.1586		23.3304	3.70794	7.14109	29.2963	2.70553	268.201	7.95833	5.78013	6.976	36.8886		1.57553	70.6365	2.88527	31.0842	0.0844382
Set869	41.5916	6.43539	21.7895	19.9357		26.7417	21.9763	32.2555	0.942191	3.43016	8.98767	7.63173	1.17614	173.678	7.33111	0.616071	12.3961		13.2417			10.7319		0.230555	5.83287	0.748717	4.17741	18.4641	2.32183	0.0351795		69.1586		24.5768	3.84608	2.01107	29.2963	2.6803	53.7439	7.79658	6.3335	11.3894	8.21714		0.408836	14.4007	8.51581	48.4976	0.0858704
Set870	77.0175	26.9198	48.5531	14.7018		22.9963	20.7764	22.9363	0.549093	3.72627	6.77767	24.1388	1.49295	69.3526	7.33111	0.477056	14.2625		4.33957		79.0718	7.90013		0.208484	5.83287	0.748717	4.48387	23.8984	2.54361	0.0251246		69.1586		27.2101	3.81162	2.01107	31.0441	3.81476	115.109	7.79658	5.78013	7.47142	6.53812		0.817671	14.4007	4.40396	88.2577	0.0844382
Set871	44.6829	28.6497	21.7895	26.4843		26.3399	18.7967	29.282	0.942191	3.43016	7.87026	16.2568	1.50086	183.383	3.99419	0.616071	14.1954	10.7767	4.17057			9.46655	37.8822	0.343061	5.2887	0.92433	4.17741	16.0376	1.26566	0.0417842		269.925	1789.52	22.7586	3.70794	7.29413	29.2963	3.55941	115.109	7.44635	5.78013	10.8707	36.0389		0.657648	19.9756	4.53049	48.4976	0.0844382
Set872	35.174	20.3646	41.8543	30.2121		22.1341	22.8327	16.2027	0.977652	3.43016	7.59344	18.336	1.50086	69.3526	8.28076	0.537117	14.1954		2.69315			7.78599	36.1001	0.208484	6.42234	0.92433	4.0084	23.8984	2.54951	0.0302683	211.245	70.0343	1190.86	26.395	3.05974	6.9524	48.1872	2.6803	53.7439	11.0926	5.63981	10.8707	26.1098		1.97223	14.4007	4.92448	75.305	0.0840325
Set873	251.958	6.43539	21.7895	30.1332		24.3853	21.9763	74.0289	0.942191	3.43016	5.42082	16.2568	1.17614	178.796	6.49766	1.01092	10.1951		13.0152			7.78599		0.294582	3.21069	0.92433	4.17741	16.0376	2.41969	0.0402038	147.759	264.784		29.2034	4.06172	2.01107	29.2963	3.55941	115.109	7.72673	5.78629	7.0537	27.6427		1.53865	14.4007	5.69468	88.2577	0.0895017
Set874	251.958	28.7192	21.7895	18.2062		21.4978	20.7764	34.0896	0.977652	3.43016	7.39543	16.2568	1.23708	253.726	6.72864	0.398109	18.2931		2.76687		84.6622	7.11904	37.8822	0.294582	5.83287	0.748717	4.0084	16.8122	1.26566	0.0302683	147.759	70.0343		28.2983	3.28053	9.66449	29.2963	4.23061	115.109	12.1411	5.63981	9.61248	6.53812		1.82755	14.4007	4.76429	26.2761	0.0844382
Set875	48.2912	28.6497	46.8896	14.7018		34.8421	25.1042	32.3979	0.977652	2.76867	7.46054	17.9295	1.23708	221.206	6.14125	0.477056	10.1951		4.17057			7.11904		0.294582	3.21069	0.748717	5.61221	16.0376	2.12622	0.045656	221.347	212.423		23.3304	4.27732	7.29413	68.8573	3.81476	53.7439	7.87746	6.3335	7.47142	22.0189		0.817671	51.6703	3.32539	88.2577	0.0895017
Set876	35.174	26.9198	21.7895	31.0802		22.9963	21.9763	32.3979	0.863257	3.86287	7.59344	7.63173	1.50086	245.804	7.71052	0.616071	10.1951		10.2107		46.7608	9.46655		0.343061	3.21069	0.92433	4.66134	16.0376	2.12622	0.0251246	211.245	212.423	1789.52	17.757	3.64917	7.14109	73.1548	2.70553	115.109	7.87746	5.78013	6.976	6.53812		0.408836	62.6281	3.32539	88.2577	0.0735628
Set877	61.1881	33.2798	62.5719	19.9357		21.4978	20.7764	28.024	0.942191	5.49408	7.49444	7.63173	5.58206	69.3526	7.68584	0.616071	14.1954		11.6778	279.021	46.7608	7.78599		0.230555	3.21069	0.748717	5.18696	16.8122	1.26566	0.0351795		69.1586		23.3304	2.05776	6.9524	30.6617	3.75541	233.102	10.2857	6.10755	9.02068	26.1098		0.817671	66.3359	5.69468	146.365	0.0844382
Set878	38.5003		21.7895	18.2062		21.9528	21.9505	33.841	0.863257	3.77719	7.42665	16.9885	1.49295	253.726	8.36604	0.398109	17.1811		2.76687		79.0718	7.11904	39.3233	0.208484	6.42234	0.92433	2.4026	23.8984	2.1158	0.0251246	211.245	71.9155		27.615	3.64917	2.01107	48.1872	3.75541	115.109	11.0926	6.54667	7.45952	26.1098		0.408836	14.4007	5.00636	31.0842	0.0844382
Set879	44.6829	28.7192	54.2987	14.7018		23.5144	21.9763	32.6782	0.977652	3.43016	8.28544	22.5511	2.1769	183.913	7.21268	0.398109	14.1954		12.7515		84.6622	7.78599	36.1001	0.208484	8.91495	0.92433	2.4026	44.1707	2.54951	0.0351795		69.1586	408.271	28.0829	4.4242	5.9043	29.2963	2.6803	188.202	7.79658	5.80275	9.61248	26.1098		0.408836	19.9756	4.52221	108.322	0.0844382
Set880	41.5916	36.7565	30.8685	30.1332		26.2264	26.0286	34.0896	1.18961	3.43016	7.49444	24.1388	5.56411	182.853	8.60957	0.923336	12.3961	10.7767	12.7504		266.343	7.11904		0.213599	5.2887	1.18812	5.61221	16.8122	1.26566	0.0351795	147.759	69.1586		25.1286	3.81162	2.01107	31.0441	2.6803	233.102	7.66008	4.72465	8.43289	8.21714		0.408836	19.9756	4.53049	26.2761	0.0870369
Set881	251.958	6.43539	66.0798	31.2074		26.2264	21.9763	46.0037	0.977652	3.43016	7.78447	16.9885	1.23708	69.3526	3.99419	0.398109	14.1954		4.17057	374.165	46.7608	9.46655		0.208484	7.99711	0.748717	4.0084	44.1707	2.54775	0.0453523	147.759	70.91	1190.86	17.702	3.70794	7.29413	29.2963	5.56536	53.7439	8.57751	6.3335	9.61248	6.53812		0.408836	71.472	2.88527	38.5825	0.0733301
Set882	35.174	36.2953	21.7895	14.7018		21.4978	21.9763	32.3979	1.2055	3.72627	7.49444	24.1388	1.73818	69.3526	7.21268	0.756352	21.584		11.6778	300.113		7.11904		0.294582	5.83287	0.92433	5.79787	18.4641	1.83219	0.0543341		69.1586		29.6678	3.75932	6.9524	66.6309	4.2666	53.7439	8.57751	4.72465	8.43289	6.53812		0.408836	14.4007	4.76429	102.37	0.0844382
Set883		6.43539	21.7895	14.7018		23.2586	21.9763	49.7816	0.977652	3.43016	8.97977	16.9885	6.06591	178.796	6.02126	0.477056	5.03823		10.2107		394.928	7.78599		0.294582	3.21069	0.748717	4.33288	16.0376	2.54951	0.0402038		71.9155		23.3304	3.99359	7.32979	31.0441	4.2666	231.932	7.87746	5.63981	9.47695	8.21714		0.817671	40.4402	2.88527	88.2577	0.0733301
Set884	181.342	75.1832	21.7895	14.7018		26.2264	25.4361	29.282	0.927279	3.86287	8.05974	37.4563	4.80438	182.853	7.21268	0.477056	14.2625		13.0152		46.7608	7.11904	36.1001	0.230555	5.83287	1.18812	6.82496	15.0673	1.28637	0.0302683		250.664		22.7586	3.28053	9.66449	30.6617	2.68945	53.7439	7.44635	5.63981	7.44762	8.21714		0.408836	19.9756	2.88527	116.483	0.0844382
Set885		6.43539	21.7895	36.1487		23.9359	20.7764	32.9922	0.549093	4.7652	7.49444	16.0853	1.49295	69.3526	7.78936	0.910391	14.1954		2.76687	279.021	46.7608	7.11904	36.1001	0.208484	8.68369	0.953044	4.0084	15.0673	1.26566	0.0467243		69.1586		26.395	4.4242	6.9524	26.7772	2.6803		7.95833	6.3335	7.44762	26.1098		0.408836	14.4007	3.32539	81.7814	0.0902923
Set886	36.8207	6.43539	21.7895	18.2062		26.2264	24.7586	49.7816	1.03907	5.50261	8.07451	16.9885	1.50086	182.853	7.78936	0.50709	18.6882		10.2107			7.11904	37.8822	0.208484	3.21069	0.748717	4.98034	10.7516	1.26566	0.045656	221.347			23.3304	3.84608	2.01107	66.6309	2.6803	80.9232	11.0926	5.51173	8.43289	27.6427		0.657648	19.9756	5.5812	26.2761	0.0733301
Set887	275.957		25.3164	31.2074		23.165	25.1042	38.4968	0.977652	6.06092	7.49444	15.897	1.17614	245.804	6.95962	0.398109	14.1954		8.85429		46.7608	7.11904	36.1001	0.208484	8.68369	1.15737	2.4026	16.8122	2.36562	0.0251246		69.1586		29.2034	3.64917	2.01107	30.6617	4.23061	80.9232	7.79658	5.78013	9.61248	26.1098		0.657648	14.4007	3.32539	88.2577	0.0733301
Set888	35.174	20.3646	21.7895	18.2062		27.7372	21.9763	29.282	0.927279	3.72627	7.49444	12.3101	1.19983	178.796	5.1065	0.477056	14.2625		12.1307	279.021		9.46655		0.294582	8.96992	1.15737	2.4026	23.8984	1.26566	0.0251246		220.36	1190.86	27.6849	3.99359	7.32979	58.5222	3.75541	181.018	7.65687	5.78013	7.47142	8.21714		0.408836	14.4007	5.69468	26.2761	0.0870729
Set889	35.174	6.43539	21.7895	18.2062		32.5106	26.0828	39.8408	0.784323	6.06092	7.49444	12.3101	1.19983	69.3526	7.78936	0.398109	5.03823		2.76687	279.021	394.928	11.8166	36.1001	0.294582	8.96992	0.748717	4.48387	27.3477	1.26566	0.0251246		212.423		23.0654	3.64917	9.74277	29.2963	2.72223	282.847	11.0926	5.78013	7.45952	8.21714		1.32948	40.4402	5.63794	58.0988	0.0895017
Set890	46.3685	28.6497	21.7895	33.7172		23.9359	25.1042	29.282	1.47241	4.74329	5.89184	12.3101	1.19983	178.796	9.64394	0.398109	14.1954		2.76687			9.23925		0.294582	5.9569	1.15737	4.66134	23.8984	2.54361	0.0417842	221.347	220.36	1789.52	31.9339	3.28053	9.41665	113.185	2.6803	115.109	8.57751	5.80275	8.78001	6.53812		1.57553	62.6281	19.8733	46.0807	0.0733301
Set891	67.3085	20.3646	35.5613	14.7018		24.2355	21.9763	33.841	0.977652	4.03738	7.59344	15.897	1.17614	178.796	3.99419	0.537117	10.1951	10.7767	7.22234	300.113		7.11904	36.1001	0.359521	5.83287	1.18812	5.79787	15.0673	2.36562	0.045656		69.1586		17.757	3.70794	5.9043	83.7044	2.6803	115.109	8.8037	5.63981	7.0537	6.53812		1.32948	66.3359	4.40396	38.5825	0.0844382
Set892	181.342	6.43539	21.7895	36.7476		23.9359	21.9763	33.1195	0.977652	3.72627	7.42665	16.9885	1.49295	182.853	3.99419	0.398109	10.1951		8.85429	279.021		7.11904	37.8822	0.208484	3.21069	1.18812	4.0084	18.3379	2.64937	0.0507678		71.9155	1190.86	22.7586	3.64917	2.01107	56.8627	2.6803	53.7439	7.95833	5.80275	10.8707	8.21714		2.35915	14.4007	4.52221	31.0842	0.0733301
Set893	67.5088	20.3646	48.1469	14.7018		26.2264	35.0033	29.282	0.980235	3.43016	7.49444	7.63173	1.19983	173.678	6.14125	0.616071	17.7969		4.17057		79.0718	10.8238	36.1001	0.343061	7.32029	1.56506	2.4026	48.3215	1.26566	0.0251246	147.759	69.1586	408.271	24.5768	4.33921	5.9043	29.2963	2.70553	115.109	7.4253	5.78013	10.0723	31.576		1.53865	19.9756	4.52221	38.5825	0.0733301
Set894	67.3085	6.43539	21.7895	19.9357		29.248	18.7967	25.4157	0.784323	2.76867	8.60937	12.3101	1.19983	178.796	6.14125	0.616071	5.03823		8.85429			7.11904	37.8822	0.208484	3.21069	1.18812	2.4026	16.0376	2.54951	0.0351795	147.759	69.1586		17.702	3.70794	2.01107	30.6617	3.55941	115.109	7.95833	5.78013	10.8707	26.1098		0.408836	14.4007	5.94457	58.4128	0.0844382
Set895	35.174		28.1715	30.2121		21.4978	23.7044	28.024	0.942191	3.43016	4.38824	15.897	1.29945	221.206	6.14125	0.910391	12.4786	10.7767	11.6778			7.11904	37.8822	0.294582	8.98037	1.46491	4.0084	34.0688	1.00072	0.0302683	147.759	69.1586		27.5875	3.99359	9.66449	29.2963	4.23061	268.201	7.95833	5.80275	10.0723	41.0581		0.408836	14.4007	4.52221	26.2761	0.0733301
Set896	29.3093	6.43539	48.5531	14.7018		22.9963	21.9763	33.841	0.980235	3.43016	7.59344	15.897	1.50086	182.853	6.14125	0.537117	10.1951		2.76687			7.78599		0.294582	3.21069	0.748717	5.61221	16.0376	1.28637	0.0351795		212.423		17.8968	3.81162	7.29413	31.0441	2.70553	53.7439	12.1411	6.3335	7.44762	31.576		0.408836	14.4007	7.5422	38.5825	0.0844382
Set897	35.174	6.43539	24.2137	34.3843		22.9963	20.7764	32.2555	1.158	3.72627	8.07451	7.63173	1.49295	173.678	7.21268	0.50709	10.1951		2.76687		266.343	7.11904	36.1001	0.294582	9.89442	0.748717	4.17741	16.0376	1.83219	0.0351795		69.1586		17.702	3.70794	7.14109	80.9243	3.55941	53.7439	8.8037	5.78013	12.8665	36.8886		1.97223	63.2772	4.52221	58.0988	0.0733301
Set898	45.8086	20.3646	48.5531	18.2062		28.7905	21.9763	31.2195	0.980235	3.43016	7.39543	16.9885	1.23708	182.853	7.21268	0.395367	20.7572		2.76687		79.0718	9.55932		0.208484	5.83287	0.748717	4.17741	16.8122	2.28896	0.045656		69.1586	408.271	22.7586	3.84608	8.6506	29.2963	2.6803	115.109	9.44459	5.78013	6.976	26.1098		1.71384	14.4007	2.88527	108.909	0.0733301
Set899		33.2798	59.6995	18.2062		23.5144	21.9505	33.1195	0.784323	3.72627	7.42665	12.3101	1.19983	178.796	7.21268	0.910391	18.6347	10.7767	2.76687		46.7608	9.46655	36.1001	0.208484	5.9569	1.59568	4.17741	32.291	2.36562	0.0543341	221.347	250.664		25.1286	3.70794	5.9043	31.0441	5.08892	53.7439	8.8037	5.63981	7.47142	6.53812		1.71384	14.4007	3.32539	26.2761	0.0733301
Set900	44.6829	6.43539	39.2562	18.2062		26.3399	21.9763	41.2565	0.784323	3.86287	5.21587	16.2568	4.76275	183.383	6.14125	0.616071	17.8797		4.33957			9.46655		0.294582	8.68369	0.92433	4.17741	16.0376	2.55123	0.0351795				34.1742	3.64917	2.01107	29.2963	2.6803	53.7439	7.65687	5.78013	10.0723	27.6427		0.657648	62.6281	5.69468	83.0284	0.0895017
Set901	38.3828	6.43539	48.1469	19.9357		26.7417	20.7764	33.1195	0.863257	3.43016	8.07451	12.3101	1.19983	178.796	4.7114	0.616071	10.1951		2.76687	279.021	46.7608	10.7319		0.230555	8.68369	1.15737	4.17741	23.8984	2.42025	0.0251246		164.731		24.5768	4.4242	2.01107	63.2736	4.29948	53.7439	7.4674	5.80275	6.976	8.21714		0.408836	62.6281	5.00636	88.2577	0.0844382
Set902	275.957	6.43539	31.3097	30.1919		28.7905	20.5575	32.3979	1.89028	4.70088	7.49444	12.3101	1.19983	182.853	6.72864	0.398109	14.2625		2.76687			7.11904		0.294582	5.83287	1.59568	5.3891	16.0376	1.26566	0.0435683		69.1586	1190.86	25.1286	3.70794	2.01107	75.3275	2.6803	53.7439	8.57751	5.80275	10.8707	26.1098		0.408836	19.9756	4.52221	31.0842	0.0844382
Set903	48.2912	20.3646	64.0427	18.2062		26.3399	21.9763	16.2027	0.850156	3.43016	7.39543	16.6425	1.49295	384.467	5.1065	0.398109	5.03823		13.01			9.46655	36.1001	0.343061	3.21069	0.92433	4.17741	16.8122	2.22341	0.0402038		69.1586	1190.86	17.757	2.05776	5.9043	75.4238	2.6803	115.109	7.79658	6.53499	8.58981	6.53812		2.45342	14.4007	4.52221	83.0284	0.0844382
Set904	38.3828	20.3646	30.8685	14.7018		24.5217	21.9763	28.024	0.977652	5.22704	7.49444	16.2568	1.17614	69.3526	6.49766	0.616071	5.03823	3.06696	2.76687	279.021	46.7608	10.7319	36.1001	0.25409	8.68369	1.15737	2.4026	23.8984	2.41969	0.0251246	147.759	69.1586		26.395	3.28053	10.1136	30.6617	4.23061	179.624	7.79658	6.10755	7.0537	6.53812		0.408836	17.732	4.76429	58.4128	0.0858704
Set905	46.3685	28.6497	24.2137	30.2121		22.9963	22.8749	49.1357	0.977652	6.35382	6.97391	16.9885	1.17614	221.206	8.36604	0.398109	16.9057		4.17057			7.11904		0.213599	7.20538	1.15737	4.48387	16.8122	2.41969	0.0351795	211.245	69.1586	1789.52	24.5768	3.70794	7.29413	30.6617	2.70553	181.018	7.95833	5.80275	10.254	6.53812		0.408836	17.732	2.88527	46.0807	0.0733301
Set906		6.43539	57.0274	14.7018		23.9359	20.7764	33.841	1.07547	3.72627	7.39543	23.7059	5.96708	183.913	6.49766	0.74285	10.1951		11.6778		266.343	12.1528	36.1001	0.230555	5.83287	1.8775	4.0084	16.8122	1.26566	0.0351795		69.1586		35.3053	3.99359	6.9524	30.6617	2.72223	53.7439	8.8037	5.78013	10.4431	31.576		0.817671	14.4007	3.32539	48.4976	0.0733301
Set907	48.2912	6.43539	21.7895	14.7018		26.2264	23.7044	29.282	0.850156	3.43016	5.99084	15.897	1.17614	69.3526	8.28076	0.616071	8.99574		2.76687		79.0718	11.1001	39.3233	0.230555	5.83287	1.18812	4.66134	45.0385	2.63276	0.0417842		70.91	408.271	23.3304	3.70794	7.32979	31.0441	2.6803	188.202	7.79658	5.80275	10.254	6.53812		0.408836	68.1917	5.94457	93.9337	0.0733301
Set908		28.6497	31.3097	30.2121		28.9467	25.4361	29.282	0.927279	3.43016	7.42665	16.6425	1.50086	173.678	6.49766	0.398109	12.3961		4.17057		79.0718	7.11904		0.208484	8.68369	0.748717	4.48387	16.8122	2.46969	0.0543341	221.347	269.925		27.6849	4.06172	7.32979	29.2963	4.2666	189.435	7.66008	6.53499	10.8707	27.6427		2.06332	19.9756	6.66849	31.0842	0.0733301
Set909	46.3685		31.3097	14.7018		26.2264	22.8327	29.282	0.942191	3.43016	8.07451	7.63173	1.19983	250.035	8.28076	0.74285	10.1951		2.76687		79.0718	10.1156	36.1001	0.208484	5.9569	0.92433	4.48387	34.0688	1.26566	0.0302683		69.1586		24.5768	3.64917	2.01107	29.2963	4.96656	268.201	8.08753	6.10755	10.0723	31.576		0.408836	68.3469	4.52221	26.2761	0.0844279
Set910	275.957	6.43539	30.8685	19.9357		29.248	20.7764	29.282	0.977652	3.43016	7.49444	22.5511	5.58206	173.678	11.0779	0.398109	12.3961		4.17057		46.7608	9.55932		0.294582	5.83287	1.15737	4.66134	16.7657	2.28896	0.0543341		71.9155	1789.52	17.702	3.81162	10.7939	56.8627	2.6803	115.109	7.65687	5.78013	10.3087	26.1098		0.408836	62.6281	3.32539	83.0284	0.0733301
Set911	46.3685	20.3646	21.7895	14.7018		26.3399	20.7764	34.0896	0.863257	4.7652	7.49444	7.63173	6.41538	250.035	7.21268	0.923336	16.7948	10.7767	2.76687		84.6622	7.11904	37.8822	1.0944	6.42234	1.18812	4.0084	15.0673	1.26566	0.0251246		70.91		22.7586	3.28053	7.14109	30.6617	5.39116	186.621	7.95833	5.63981	10.0723	27.6427		0.408836	40.4402	2.88527	48.4976	0.0870369
Set912	67.3085		26.4191	14.7018		24.5217	20.7764	34.0896	0.977652	5.22704	7.41104	7.63173	1.19983	173.678	8.28076	1.05585	8.99574		12.7515		394.928	9.46655	37.8822	0.343061	7.99711	0.953044	2.4026	32.291	2.22341	0.0302683		70.91	1789.52	17.8968	3.84608	9.66449	29.2963	4.23061		7.79658	5.79144	6.976	54.4729		2.41205	19.9756	4.92448	38.5825	0.0895017
Set913		28.7192	31.3097	18.2062		26.3399	25.4361	29.282	0.980235	2.76867	7.49444	15.897	3.26056	119.353	5.30405	0.580249	14.1954	10.7767	7.22234	279.021	79.0718	7.11904	39.3233	0.208484	8.68369	1.40399	5.24327	72.7446	2.36562	0.0302683				35.1854	3.81162	5.9043	30.6617	3.77702	188.202	11.0926	5.79144	7.45952	39.8722		1.05943	40.4402	2.88527	69.3641	0.0870369
Set914	35.174	33.4449	61.7492	35.4188		31.2151	26.9531	32.3979	1.01846	4.08588	7.42665	7.63173	1.73818	119.353	6.95962	0.398109	5.03823		11.6778		79.0718	10.8238	36.1001	0.343061	5.2887	1.78055	4.17741	27.3477	1.28637	0.0435683		260.295		17.757	3.70794	2.01107	88.0733	4.2666	115.109	7.79658	6.10755	10.8707	40.5495		0.408836	14.4007	5.94457	83.0284	0.0864537
Set915	114.816	6.43539	48.1469	31.2074		26.2092	22.8749	28.024	1.02615	3.77719	8.30485	16.2568	3.26056	173.678	6.14125	0.537117	5.03823	10.7767	8.85429			7.11904		0.25409	3.21069	0.92433	4.0084	16.8122	2.311	0.0417842		69.1586		21.0022	4.06172	9.75247	29.2963	2.6803	115.109	7.87746	5.78629	8.43289	31.576		0.657648	66.3359	5.69468	26.2761	0.0816487
Set916		28.7192	21.7895	14.7018		26.2264	23.7044	33.1195	0.982369	4.70088	7.46054	16.2568	1.50086	69.3526	6.14125	0.923336	14.2625	10.7767	2.76687			7.11904	39.3233	0.208484	8.62603	1.40399	4.0084	43.9437	2.23818	0.0402038	147.759	70.91	408.271	26.395	3.05974	2.01107	25.652	3.39892	231.932	8.8037	5.78013	10.4431	36.1513		0.657648	19.9756	2.88527	58.4128	0.0733301
Set917	124.325	28.6497	31.5962	31.2074		26.2264	21.9763	29.282	0.977652	5.50261	7.51004	12.3101	1.17614	183.913	6.72864	0.398109	5.03823		2.76687			7.11904	36.1001	0.294582	5.9569	1.15737	2.4026	16.8122	1.27601	0.045656		268.835	1190.86	21.0022	3.64917	5.9043	29.2963	2.6803	115.109	7.95833	5.78013	6.976	37.4485		3.02305	14.4007	6.66849	58.0988	0.0844279
Set918	29.3093	20.3646	30.8685	14.7018		26.2264	26.0828	29.282	0.942191	3.43016	6.23137	16.6425	1.49295	253.726	6.14125	0.878072	14.1954	10.7767	2.76687		394.928	7.11904		0.208484	9.89442	1.15737	2.4026	16.8122	1.26566	0.0351795	211.245	71.9155	408.271	30.5607	3.70794	7.32979	30.6617	2.6803	53.7439	8.8037	5.78013	7.47142	8.21714		0.408836	19.9756	3.32539	26.2761	0.0733301
Set919	41.5916	26.9198	21.7895	31.2074		26.2264	26.9531	28.024	0.977652	5.38904	7.59344	7.63173	1.23708	253.726	7.68584	0.756352	18.7971		2.76687			9.46655		0.213599	6.42234	0.748717	5.75339	23.8984	1.28637	0.0509471		69.1586		17.8968	4.58302	6.9524	25.652	2.72223	115.109	12.1411	5.63981	8.43289	6.53812		0.408836	19.9756	3.32539	108.322	0.0844382
Set920	48.2912	26.4087	47.6499	18.2062		26.2264	26.1852	28.024	0.784323	3.43016	8.73273	15.897	6.41538	178.796	8.60957	0.398109	18.6065	10.7767	12.4877			10.7319	37.8822	0.213599	5.9569	1.15737	4.17741	47.7364	2.42025	0.0543341		69.1586	408.271	24.5768	3.81162	2.01107	30.6617	4.2666	231.932	7.79658	5.78013	8.58981	26.1098		1.93322	19.9756	2.88527	108.909	0.0870729
Set921	171.633	26.9198	35.5613	18.2062		22.9963	20.7764	33.1195	1.07547	3.72627	7.59344	15.897	1.23708	259.558	8.60957	0.50709	10.1951		13.0007			7.78599		0.208484	9.89442	1.15737	10.664	43.9437	1.26566	0.0897819	147.759	164.731		17.8968	3.81162	2.01107	29.2963	2.72223		11.0926	6.3335	8.43289	27.6427		0.408836	71.472	3.32539	52.2467	0.0895017
Set922	44.6829	28.6497	39.2562	19.9357		28.7905	22.8327	28.024	1.18961	5.22704	7.49444	7.63173	1.17614	173.678	6.72864	0.398109	12.3961		2.76687		46.7608	10.2606		0.208484	3.21069	1.15737	5.61221	16.0376	1.26566	0.0251246		69.1586		26.395	3.28053	7.29413	73.1548	3.81476	181.018	11.0926	5.63981	10.3087	8.21714		0.408836	40.4402	3.32539	26.2761	0.0733301
Set923	35.174	6.43539	21.7895	18.2062		26.3399	21.9763	33.1195	0.784323	2.76867	7.46054	7.63173	3.26056	173.678	5.30405	0.398109	10.1951		4.17057		394.928	9.46655	37.8822	0.230555	5.83287	0.92433	5.08365	27.3477	1.26566	0.067855		69.1586		17.757	3.84608	2.01107	30.6617	2.70553		7.79658	5.63981	10.7653	31.7851		1.77948	17.732	5.46381	46.0807	0.109511
Set924	36.8207	6.43539	31.3097	29.6301		24.5217	21.9763	72.8569	0.863257	3.43016	7.59344	15.897	1.50086	69.3526	6.14125	0.756352	18.6347		2.76687	325.79	79.0718	7.11904	37.8822	0.208484	5.2887	0.92433	4.17741	72.7446	1.26566	0.0251246	147.759	70.0343		31.0372	3.70794	2.01107	76.5999	3.55941	53.7439	7.79658	5.78013	9.61248	28.3715		0.408836	19.9756	4.40396	26.2761	0.0733301
Set925	251.958	20.3646	30.8685	18.2062		26.2264	22.6611	31.9261	0.942191	6.07134	7.46054	7.63173	1.23708	69.3526	6.02126	0.756352	12.3961		2.76687			10.8238		0.208484	5.83287	1.18812	4.66134	16.0376	2.42025	0.0351795	147.759	70.0343		30.5607	3.99359	11.1188	105.813	4.2666	53.7439	7.95833	5.51173	7.47142	31.576		0.817671	43.1557	4.76429	58.4128	0.0844382
Set926	29.3093	60.267	31.3097	18.2062		23.5144	22.6611	28.024	0.977652	3.43016	7.59344	12.3101	1.19983	69.3526	4.7114	0.756352	10.1951	10.7767	4.17057	300.113		9.46655		0.90146	5.83287	0.748717	2.4026	47.7364	2.54702	0.0467243		69.1586	408.271	17.8968	3.99359	5.9043	48.1872	5.72254	53.7439	7.65687	5.51173	8.58981	26.1098		0.408836	19.9756	3.32539	44.7485	0.0844279
Set927	35.174	28.6497	48.1469	18.2062		26.3399	22.6611	34.0896	0.863257	3.02412	8.46268	16.729	1.17614	69.3526	8.36604	0.756352	14.1954		7.14862			7.11904	36.1001	0.208484	3.21069	0.748717	2.4026	10.7516	2.54951	0.0402038	147.759	164.731		23.3304	2.05776	7.29413	75.3275	4.23061	188.202	7.79658	5.78013	10.8707	27.6427		1.71384	19.9756	4.40396	75.305	0.0844382
Set928	35.174	6.43539	21.7895	18.2062		26.3399	20.7764	32.7659	0.980235	5.49408	7.59344	15.897	5.60193	69.3526	8.36604	0.50709	10.1951	10.7767	14.1385	279.021		7.11904	36.1001	0.213599	5.83287	1.40399	4.0084	29.764	2.12622	0.0351795	221.347	171.69		22.7586	3.64917	5.9043	30.6617	3.39892	53.7439	11.8283	6.54667	9.61248	8.21714		0.657648	62.6281	3.32539	31.0842	0.0844382
Set929	35.174	6.43539	25.3164	14.7018		21.4978	22.8327	32.9922	0.863257	3.72627	7.51004	16.9885	4.74873	183.913	3.99419	0.398109	8.99574	10.7767	2.76687		394.928	7.11904	36.1001	0.208484	5.83287	1.58113	4.17741	16.0376	2.42025	0.0351795	221.347	69.1586		23.0654	3.64917	7.29413	30.6617	3.77702	186.621	7.79658	5.78013	7.47142	31.7851		0.408836	21.8759	7.19645	26.2761	0.0733301
Set930	35.174	28.7192	21.7895	14.7018		23.5144	18.7967	33.1195	0.977652	3.02412	8.28544	16.2568	5.58206	69.3526	6.14125	0.398109	14.1954		4.17057	342.514	394.928	7.11904		0.294582	8.96992	1.59568	4.48387	15.0673	2.36562	0.0402038		70.91	1789.52	28.2983	4.27732	7.32979	75.3275	2.72223	231.932	10.7549	5.78013	7.47142	24.7138		2.02031	40.4402	5.46381	88.2577	0.0844279
Set931	35.174	28.7192	59.4655	31.2074		23.9359	26.0828	49.7816	0.980235	5.53867	7.49444	16.729	1.49295	384.467	7.21268	0.756352	10.1951		8.85429		266.343	7.11904	36.1001	0.230555	8.68369	1.15737	4.0084	24.0335	1.83219	0.0402038		212.423	408.271	17.757	4.58302	2.01107	75.3275	2.6803	115.109	7.79658	5.79144	10.3087	22.0189		0.408836	40.4402	5.94457	93.9337	0.0844382
Set932	275.957	36.7565	21.7895	14.7018		28.9467	18.7967	29.282	0.977652	2.76867	8.07451	16.2568	1.29945	69.3526	7.78936	0.616071	14.1954		10.2107	279.021		9.46655		0.208484	5.83287	0.748717	4.17741	41.0638	1.26566	0.0351795	221.347	71.9155	408.271	22.7586	3.64917	5.9043	26.7772	6.21623	53.7439	8.8037	5.78013	10.254	27.6427		0.657648	19.9756	2.88527	46.0807	0.133966
Set933	35.174	28.7192	48.9698	18.2062		24.507	20.7764	34.0896	0.784323	4.78571	7.42665	15.897	1.17614	69.3526	8.36604	0.398109	14.1954		2.76687	279.021		12.1528	37.8822	0.208484	8.98037	0.92433	4.17741	23.8984	2.54951	0.0453523		69.1586	1190.86	22.7586	4.03662	2.01107	48.1872	2.6803	53.7439	11.0926	5.63981	8.43289	26.1098		0.817671	14.4007	2.88527	46.0807	0.0733301
Set934	41.5916	20.3646	47.6499	33.9025		26.2264	21.9763	34.0896	0.863257	5.38904	8.69694	7.63173	1.23708	259.558	7.71052	0.537117	10.1951		13.6864			7.11904		0.208484	5.83287	1.18812	4.66134	43.9437	2.42025	0.0402038		164.731	1190.86	29.6678	4.06172	2.01107	29.2963	2.6803	53.7439	7.87746	5.80275	7.0537	22.0189		0.408836	19.9756	5.5812	83.0284	0.0733301
Set935	77.0175	6.43539	21.7895	18.2062		24.5801	21.9763	32.6782	0.863257	4.78571	6.92441	7.63173	4.74873	173.678	6.14125	0.398109	12.4786		2.76687	279.021		9.46655	36.1001	0.294582	8.98037	1.18812	4.48387	32.291	1.28637	0.0565236	147.759	220.36		27.6849	3.84608	7.32979	76.5999	2.6803	98.0799	8.8037	6.3335	10.7653	36.0389		0.817671	64.9114	2.88527	31.0842	0.0733301
Set936		6.43539	52.6713	14.7018		22.9963	21.9763	33.1195	0.942191	5.36888	8.98767	15.897	1.49295	178.796	9.64394	0.50709	14.2625		8.85429			7.11904	36.1001	0.208484	5.9569	0.748717	4.66134	23.8984	1.83219	0.0402038	221.347	268.835		17.757	3.84608	7.14109	29.2963	2.6803	245.125	8.57751	5.78013	7.44762	24.7138		0.657648	19.9756	9.21028	26.2761	0.0733301
Set937	45.8086	6.43539	21.7895	14.7018		30.123	21.9505	30.5318	0.863257	4.79185	7.46054	7.63173	1.23708	245.804	6.14125	0.616071	12.3961		2.76687		266.343	11.1001		0.213599	5.83287	0.92433	4.17741	15.0673	1.27601	0.0251246	147.759	264.784	1190.86	24.5768	4.97924	7.29413	31.0441	5.39116	115.109	7.95833	5.80275	6.976	26.1098		0.408836	19.9756	3.32539	38.5825	0.0858704
Set938	38.5003	36.2953	40.5321	19.9357		25.2309	21.9505	34.0896	0.549093	3.43016	5.89184	12.3101	1.17614	69.3526	8.60957	0.398109	14.2625		7.22234	279.021		9.46655	37.8822	0.343061	8.91897	1.40399	4.17741	48.3215	2.28896	0.0351795				17.8968	3.70794	5.9043	75.3275	3.55941	231.932	8.57751	5.79144	7.47142	31.576		1.71384	66.3359	10.5539	93.9337	0.0870369
Set939	275.957	88.5187	21.7895	39.801		29.3514	21.9763	36.4628	0.942191	3.72627	8.07451	12.3101	1.17614	178.796	7.21268	0.616071	10.1951		2.76687	300.113		9.46655	36.1001	0.208484	8.68369	1.18812	4.17741	33.7386	1.26566	0.0251246	211.245	171.69	1789.52	17.702	3.70794	9.75247	113.829	4.23061		8.8037	5.78013	9.61248	8.21714		0.657648	63.2772	4.52221	130.436	0.0733301
Set940	48.2912	60.267	20.709	18.2062		26.2264	26.0828	38.4968	0.549093	2.76867	9.28229	22.5511	1.50086	183.913	7.71052	0.756352	14.1954		4.17057		79.0718	7.11904	36.1001	0.427333	6.42234	0.92433	4.0084	32.291	2.55043	0.0251246		70.91		26.395	4.33921	7.29413	30.6617	2.70553	53.7439	7.72673	5.80275	8.43289	31.576		0.408836	19.9756	5.69468	81.7814	0.0844382
Set941	41.5916	6.43539	21.7895	14.7018		26.2264	20.7764	34.0896	0.863257	3.43016	7.59344	15.897	1.17614	183.913	5.1065	0.50709	14.1954	10.7767	2.76687			7.78599	36.1001	0.208484	3.21069	0.92433	4.17741	18.3379	1.26566	0.045656		70.91	1190.86	17.702	3.28053	2.01107	29.2963	4.23061	53.7439	7.95833	8.187	8.43289	26.1098		0.408836	14.4007	7.19645	52.2467	0.0870729
Set942	35.174	6.43539	49.5943	36.7476		27.7396	25.1042	36.4628	0.942191	3.43016	8.46268	12.3101	1.17614	69.3526	7.71052	0.616071	14.1954		4.33957	279.021		9.55932		0.294582	3.21069	0.748717	4.0084	18.4641	1.00072	0.0251246	211.245	69.1586	408.271	29.2034	3.99359	2.01107	25.652	2.68945	53.7439	8.57751	5.78013	10.3087	38.2527		1.57553	14.4007	4.40396	46.0807	0.0870729
Set943	67.5088	6.43539	21.7895	36.1487		22.9963	23.7044	28.024	0.784323	3.43016	6.97391	17.2964	2.1769	69.3526	6.49766	0.46671	16.9108		2.76687	279.021	266.343	7.11904		0.208484	7.20538	2.39417	2.4026	49.0132	1.26566	0.0402038		69.1586	1190.86	23.3304	3.28053	2.01107	26.7772	5.15502	115.109	7.87746	5.51173	8.43289	31.7851		0.408836	19.9756	5.94457	26.2761	0.0895017
Set944	57.7998	75.1832	21.7895	14.7018		23.2586	23.9896	43.4218	0.977652	3.43016	4.32623	7.63173	1.23708	69.3526	7.22734	0.50709	12.3961		2.76687			7.11904		0.208484	8.68369	0.92433	4.48387	43.9437	1.28637	0.0565236	147.759	70.0343		26.395	3.77153	8.6506	29.2963	2.68945	53.7439	7.95833	5.78013	7.47142	6.53812		0.408836	66.3359	2.88527	46.0807	0.0870369
Set945	38.5003	28.6497	53.6595	34.5342		29.248	21.9763	34.0896	0.980235	3.43016	8.46268	16.0853	5.58206	182.853	8.36604	0.537117	14.2625		4.17057	359.238		7.90013		0.343061	5.2887	1.18812	4.17741	15.0673	2.42025	0.0351795	147.759	212.423		17.702	4.06172	2.01107	31.0441	2.70553	226.99	7.87746	5.79144	10.254	8.21714		0.657648	19.9756	4.40396	83.0284	0.0870369
Set946		20.3646	42.1696	19.9357		24.5217	20.7764	44.9554	1.18961	5.94591	7.49444	15.897	1.17614	182.853	7.71052	0.537117	14.2625	10.7767	10.7588		46.7608	9.55932	36.1001	0.230555	5.83287	0.748717	6.82496	44.1707	1.83219	0.0402038	221.347			22.7586	3.81162	2.01107	30.6617	5.53851	53.7439	8.8037	5.79144	10.0723	6.53812		0.657648	70.6365	5.00636	26.2761	0.0870729
Set947	45.8086		31.3097	30.1919		21.4978	20.7764	33.1195	0.977652	3.43016	7.59344	16.9885	4.42534	69.3526	8.28076	0.398109	14.1954		2.76687		266.343	9.46655		0.208484	8.91495	0.748717	5.61221	45.0385	1.26566	0.0402038		317.144	1190.86	24.5768	3.70794	7.14109	26.7772	2.70553	115.109	10.0265	6.53499	7.47142	36.1513		0.408836	62.6281	3.32539	46.0807	0.0733301
Set948	35.174	6.43539	31.5962	30.2121		26.2264	20.7764	25.4157	0.977652	4.96164	8.0618	16.2568	1.49295	69.3526	6.14125	0.853231	24.1856		2.76687			10.2606	36.1001	0.208484	3.21069	0.92433	4.0084	18.3379	2.25618	0.0402038		71.9155	1190.86	26.395	4.06172	7.14109	26.7772	4.96656	53.7439	7.79658	5.78013	7.44762	6.53812		0.408836	62.6281	3.32539	31.0842	0.0733301
Set949	48.2912	6.43539	63.4357	19.9357		23.9359	22.8749	71.0978	0.980235	3.43016	8.69694	12.3101	1.19983	69.3526	8.36604	0.398109	14.1954		2.76687	300.113		9.46655		1.21343	6.42234	1.79114	6.05945	23.8984	2.311	0.0565236	221.347	69.1586		24.5768	2.05776	7.29413	29.2963	4.23061	179.624	7.72673	5.78013	10.7653	8.21714		0.657648	40.4402	4.40396	26.2761	0.0733301
Set950	35.174	25.0538	39.9299	18.2062		23.5144	21.9763	33.1195	0.784323	2.76867	8.07451	16.0853	5.58206	178.796	8.28076	0.46671	14.1954		4.17057			7.11904	36.1001	0.294582	5.9569	1.15737	4.66134	20.6382	1.26566	0.0351795		220.36	1190.86	24.5768	3.81162	7.29413	73.1548	4.2666		8.8037	5.78013	10.254	31.576		1.99292	19.9756	4.92448	26.2761	0.0733301
Set951		38.6049	31.5962	31.2074		26.2264	20.7764	28.024	0.549093	2.76867	8.0618	7.63173	3.69928	183.383	6.72864	0.616071	10.1951	10.7767	13.0152			10.2606	36.1001	0.343061	5.83287	1.15737	4.66134	16.8122	1.26566	0.0402038	147.759	78.1269		31.6616	3.28053	7.32979	56.8627	4.23061	231.932	7.95833	5.80275	7.47142	8.21714		0.408836	62.6281	3.32539	58.0988	0.0733301
Set952	35.174	38.6049	58.7114	14.7018		26.2092	20.7764	25.4157	0.980235	5.22704	7.59344	16.729	1.23708	173.678	7.21268	0.616071	5.03823		4.33957	279.021		7.11904	37.8822	0.343061	5.2887	1.15737	4.48387	16.0376	1.26566	0.0402038	211.245	69.1586		17.757	3.64917	5.9043	31.0441	5.56536	53.7439	7.79658	6.53499	10.4431	8.21714		1.93322	66.3359	2.88527	75.305	0.0733301
Set953	41.5916	6.43539	48.5531	14.7018		30.7339	21.9763	29.282	0.549093	4.79185	7.39543	12.3101	1.19983	183.913	10.9182	0.395367	5.03823		2.76687			9.46655		0.343061	5.9569	1.40399	5.61221	16.8122	2.34467	0.0402038		278.466		23.0654	3.99359	8.16582	29.2963	2.70553	115.109	16.82	5.63981	8.58981	8.21714		0.408836	14.4007	3.32539	130.436	0.0870729
Set954	41.5916	28.7192	31.5962	14.7018		26.7417	20.7764	32.2555	0.977652	3.43016	5.21587	7.63173	1.23708	173.678	3.99419	0.853231	16.3865		2.76687	300.113		10.7171		1.19612	8.91495	0.748717	5.3891	45.0385	1.28637	0.0402038		69.1586	408.271	24.5768	4.27732	7.29413	48.1872	4.2666	115.109	7.87746	5.80275	7.47142	26.1098		1.05943	19.9756	2.88527	31.0842	0.0767362
Set955	251.958	75.1832	48.5531	18.2062		23.9359	20.7764	33.1195	0.942191	3.43016	7.59344	18.336	1.73818	69.3526	11.0779	0.756352	16.3865		12.1307	279.021		10.7319		0.208484	5.83287	0.953044	2.4026	16.8122	1.26566	0.0351795		264.565		26.395	3.84608	2.01107	76.5999	3.39892	115.109	7.72673	5.51173	7.47142	8.21714		0.408836	17.732	3.32539	26.2761	0.08697
Set956	35.174	6.43539	21.7895	18.2062		29.248	25.1042	38.4968	0.977652	5.38904	7.49444	7.63173	1.19983	311.264	6.72864	0.398109	8.99574		2.76687			7.11904		1.0944	3.21069	0.748717	4.48387	27.3477	2.42025	0.045656	221.347	69.1586	408.271	26.395	3.99359	2.01107	29.2963	2.6803	53.7439	11.8283	4.72465	5.10641	6.53812		0.657648	53.5555	2.88527	31.0842	0.0733301
Set957	35.174	20.3646	21.7895	36.1487		28.7409	20.7764	29.282	0.980235	4.7652	6.97391	12.3101	1.19983	69.3526	5.30405	0.398109	20.456		2.76687	279.021	79.0718	7.11904		0.213599	3.21069	1.15737	4.17741	16.0376	2.42025	0.0402038		212.423		29.0283	3.70794	2.01107	31.0441	2.70553	115.109	8.8037	5.63981	7.0537	6.53812		0.657648	14.4007	4.40396	86.3744	0.0733301
Set958	41.5916	36.1926	48.1469	18.2062		26.3399	22.8327	39.1416	0.784323	5.22704	8.98767	7.63173	1.19983	69.3526	5.30405	0.398109	10.1951	10.7767	2.76687			10.7319	39.3233	0.208484	3.21069	1.18812	4.0084	16.0376	2.12622	0.0251246		212.423	1190.86	17.8968	3.81162	9.66449	48.1872	3.81476	268.201	7.4253	5.51173	6.976	31.7851		0.408836	43.8292	2.88527	88.2577	0.0733301
Set959	37.8389	28.6497	21.7895	30.2121		26.2264	18.7967	30.5318	0.977652	3.43016	8.46268	16.9885	1.17614	69.3526	8.28076	0.756352	5.03823		2.76687			10.9619	39.3233	0.208484	5.2887	0.748717	4.0084	15.0673	1.26566	0.0251246	147.759	220.36		23.3304	3.64917	9.98623	30.6617	2.68945	83.712	11.7677	5.63981	8.43289	26.1098		0.817671	62.6281	2.88527	38.5825	0.0844279
Set960	35.174	28.7192	21.7895	18.2062		26.3399	28.4046	29.282	0.549093	3.72627	7.59344	22.5511	1.17614	69.3526	6.2446	0.46671	10.1951	10.7767	12.7515		46.7608	9.46655	36.1001	0.208484	8.85246	0.748717	4.0084	20.6382	1.26566	0.0302683		69.1586	1789.52	30.5607	3.84608	2.01107	31.0441	4.23061	188.202	7.72673	5.78013	10.0723	36.8886		1.71384	64.9114	4.52221	69.3641	0.0733301
Set961	35.174	20.3646	31.5962	30.1919		26.3399	22.8327	29.282	0.850156	3.43016	8.07451	16.2568	1.49295	173.678	11.0779	0.616071	10.1951		11.6778		46.7608	9.47711	39.3233	0.208484	5.2887	1.15737	7.07956	16.8122	1.28637	0.0351795		69.1586	408.271	27.5875	3.70794	7.32979	31.0441	2.6803	282.847	7.72673	5.78013	6.976	6.53812		0.657648	62.6281	4.40396		0.0844382
Set962	67.3085	6.43539	21.7895	18.2062		28.2743	21.9763	28.024	0.977652	3.43016	7.59344	18.336	1.17614	182.853	6.14125	0.50709	14.1954		4.33957		79.0718	9.55932		0.213599	9.63297	0.92433	4.33288	18.3379	1.00072	0.0302683	147.759	69.1586	1190.86	23.3304	3.84608	2.01107	29.2963	4.2666	53.7439	7.95833	5.78013	5.10641	8.21714		0.817671	21.8759	2.88527	46.0807	0.0733301
Set963		20.3646	21.7895	14.7018		27.6642	21.9763	33.841	0.977652	6.06092	7.46054	18.336		446.999	7.33111	0.477056	5.03823		12.7504		46.7608	9.55932		0.427333	3.21069	0.748717	4.49711	41.0638	2.54775	0.0467243	147.759	220.36	1190.86	22.7586	4.58302	7.29413	30.6617	2.6803	115.109	7.65687	5.80275	10.0723	6.53812		0.408836	21.8759	7.19645	93.9337	0.109511
Set964	38.5003	20.3646	25.938	14.7018		26.2264	20.7764	29.282	0.927279	4.78571	7.39543	16.9885	4.24648	182.853	7.21268	1.19632	14.1954		2.76687			12.1528	36.1001	0.427333	8.96992	1.18812	5.3891	45.0385	2.311	0.0351795	147.759	69.1586		21.0022	3.64917	6.9524	48.1872	2.68945	179.624	2.95501	5.79144	10.4898	41.7806		0.646661	19.9756	3.32539	58.4128	0.0791169
Set965	36.8207	28.7192	21.7895	14.7018		21.4978	20.7764	29.282	1.158	3.72627	7.49444	12.3101	1.19983	182.853	6.14125	0.398109	14.1954	10.7767	10.7588			10.688	37.8822	0.208484	5.83287	0.748717	4.17741	41.0638	2.12622	0.0402038	147.759	71.9155	408.271	27.2101	5.16967	2.01107	48.1872	2.68945	98.0799	7.72673	7.89081	10.254	8.21714		0.657648	19.9756	7.19645	124.257	0.0844382
Set966	35.174	6.43539	22.4613	14.7018		21.4978	26.1852	32.3979	0.549093	2.76867	7.59344	23.7059	1.49295		8.36604	0.46671	8.99574		8.09591		266.343	7.78599	36.1001	0.213599	5.2887	1.15737	2.4026	16.0376	1.26566	0.045656		78.1269		21.0022	3.81162	2.01107	31.0441	5.6422	115.109	7.79658	5.63981	10.254	8.21714		0.408836	62.6281	6.80712	38.5825	0.0733301
Set967	41.5916	33.4449	21.7895	14.7018		22.0102	26.246	33.1195	0.977652	3.86287	7.59344	16.2568	6.58232	173.678	8.36604	0.923336	12.3961		11.6778		46.7608	7.11904		0.230555	9.44137	0.748717	2.4026	36.7796	1.26566	0.0402038		70.91		27.5875	4.06172	7.29413	29.2963	5.39116	268.201	7.95833	5.80275	10.3087	36.0389		0.408836	19.9756	7.95842	58.4128	0.0733301
Set968	43.98	28.7192	30.8685	18.2062		26.2264	21.9763	26.974	0.980235	5.49408	7.51004	12.3101	1.19983	183.913	9.64394	0.537117	10.1951		10.2107		46.7608	7.11904		0.294582	5.9569	1.8775	2.4026	27.3477	2.42025	0.0302683	147.759	69.1586		17.757	3.70794	9.41665	26.7772	2.6803	115.109	7.65687	5.78013	6.976	36.0389		0.657648	53.5555	9.56959	88.2577	0.0895017
Set969	45.8086	6.43539	35.5613	30.2121		30.123	20.7764	32.6782	1.00426	2.76867	7.59344	12.3101	1.19983	178.796	6.14125	0.477056	10.1951	10.7767	2.76687			9.46655	36.1001	0.213599	5.9569	0.748717	4.48387	23.8984	2.311	0.045656		220.36	408.271	17.702	3.81162	2.01107	26.7772	2.6803	53.7439	11.2189	7.89081	7.47142	27.6427		0.817671	21.8759	6.66849	38.5825	0.0733301
Set970	43.98	38.6049	47.6499	35.4834		23.5144	21.9763	29.282	0.942191	2.76867	7.59344	15.897	1.17614	121.515	6.49766	0.477056	14.1954		7.83388	279.021	46.7608	7.78599	36.1001	0.208484	8.96992	1.3919	4.48387	15.0673	1.26566	0.0351795		69.1586	408.271	23.3304	3.70794	11.097	48.1872	2.6803	186.621	8.8037	5.63981	6.976	6.53812		0.408836	62.6281	4.76429	52.2467	0.0870369
Set971	37.8389	20.3646	48.5531	30.2121		26.2264	21.9763	33.841	0.863257	5.94591	8.07451	12.3101	1.19983	178.796	9.64394	0.398109	14.1954	10.7767	10.7588		79.0718	7.11904	39.3233	0.208484	5.83287	0.748717	5.41668	23.8984	2.42025	0.0435683		171.69	408.271	17.702	2.05776	2.01107	30.6617	3.55941	176.809	7.79658	4.72465	10.254	31.576		0.817671	14.4007	3.32539	81.7814	0.0844382
Set972	35.174	25.0538	21.7895	14.7018		21.4978	21.9763	46.0037	0.942191	3.72627	9.35015	15.897	1.49295	178.796	8.36604	0.475992	14.1954		11.6778	279.021		10.7319	36.1001	0.208484	5.2887	1.15737	4.48387	49.0132	2.42025	0.0351795		296.127		23.3304	3.28053	2.01107	47.7278	3.39892	181.018	7.72673	5.78013	7.47142	40.5495		1.32948	62.6281	2.88527	46.0807	0.0870369
Set973	44.6829	20.3646	30.8685	18.2062		21.4978	22.8327	34.0896	0.942191	3.43016	8.07451	16.2568	4.74873	173.678	7.33111	0.616071	12.3961	10.7767	2.76687			7.78599	37.8822	0.208484	8.68369	1.18812	4.17741	49.0132	2.69408	0.0402038		69.1586	408.271	17.757	3.70794	5.9043	66.6309	2.70553	231.932	12.1411	6.53499	7.47142	26.1098		0.408836	68.3469	3.32539	124.257	0.0844382
Set974	41.5916	20.3646	21.7895	14.7018		26.2264	20.7764	22.9363	1.158	3.43016	7.49444	16.2568	1.73818	69.3526	11.0779	0.756352	14.1954		9.43942			11.1001		0.208484	3.21069	1.15737	5.61221	15.0673	2.54951	0.0302683		70.0343	1190.86	23.3304	3.70794	7.32979	25.652	2.70553	115.109	7.87746	5.80275	7.47142	27.6427		0.657648	70.6365	2.88527	93.9337	0.0733301
Set975	171.633	28.7192	48.1469	18.2062		25.2309	23.7044	28.024	0.980235	3.72627	7.42665	16.2568	1.49295	69.3526	6.95962	0.398109	18.6882	10.7767	2.76687		266.343	7.78599		0.208484	5.83287	0.605806	2.4026	44.1707	2.54361	0.0302683		69.1586		40.9286	3.77153	14.5663	26.7772	5.55785	53.7439	8.8037	5.78013	10.7653	6.53812		0.408836	40.4402	3.32539	88.2577	0.135198
Set976			26.4191	18.2062		26.3399	26.3824	49.045	0.977652	3.43016	7.39543	7.63173	1.19983	173.678	7.71052	0.756352	12.3961		10.7588		266.343	7.11904	37.8822	0.230555	5.83287	1.18812	4.17741	44.1707	2.12622	0.0402038		70.91		29.6514	3.81162	2.01107	25.652	2.6803	53.7439	8.57751	5.78013	10.7653	26.1098		0.657648	75.5818	4.92448	52.2467	0.0895017
Set977	35.174	6.43539	21.7895	18.2062		21.4978	20.7764	38.4968	0.977652	3.43016	8.46268	12.3101	1.19983	178.796	9.64394	0.398109	18.6115		11.6778		46.7608	7.78599		0.807022	5.83287	0.748717	2.4026	46.2461	1.00072	0.0402038	221.347	220.36	1190.86	17.8968	3.28053	12.3791	29.2963	2.6803	231.932	8.8037	5.78629	7.47142	36.1513		1.53865	19.9756	2.88527	26.2761	0.0858704
Set978		25.0538	35.5613	18.2062		26.3399	20.7764	49.1357	1.03907	4.70088	7.49444	29.2052	5.83615	274.803	8.28076	0.477056	10.1951		4.17057			10.8238	39.3233	0.294582	3.21069	1.15737	2.4026	34.0688	1.83219	0.0402038		69.1586	1789.52	23.3304	3.28053	10.3488	75.3275	3.91301	53.7439	8.8037	5.78013	6.976	27.6427		0.657648	19.9756	2.88527	48.4976	0.0733301
Set979		6.43539	21.7895	36.7476		22.9963	21.9763	33.1195	0.977652	3.72627	5.87933	7.63173	2.1769	69.3526	6.02126	0.398109	10.1951	10.7767	2.76687	300.113	46.7608	7.11904	36.1001	0.208484	5.83287	1.56506	4.17741	34.0688	2.311	0.045656		70.0343		17.702	4.33921	7.29413	29.2963	4.23061	53.7439	8.9603	5.78629	7.44762	26.1098		0.408836	53.5555	2.88527	93.9337	0.0733301
Set980	46.3685	33.4449	31.5962	31.2074		23.9359	23.7044	37.0138	0.977652	3.43016	7.59344	15.897	1.49295	263.989	7.21268	0.724461	8.99574	10.7767	4.17057		79.0718	7.11904	36.1001	0.807022	8.68369	1.15737	4.0084	32.291	1.26566	0.0251246	147.759	69.1586	408.271	26.395	4.27732	2.01107	31.0441	2.68945	188.202	7.66008	5.80275	7.44762	26.1098		0.646661	21.8759	2.88527	44.7485	0.0844382
Set981		6.43539	45.529	31.0361		26.3399	20.7764	38.4968	0.863257	3.43016	8.38573	16.2568	1.23708	182.853	7.21268	0.46671	14.1954		4.17057			7.11904	36.1001	0.807022	9.89442	0.92433	4.17741	15.0673	1.26566	0.0351795	147.759	69.1586		24.5768	3.81162	5.9043	56.8627	2.6803	282.847	8.8037	5.80275	6.976	8.21714		0.408836	40.4402	7.19645	44.7485	0.0929287
Set982	44.6829	6.43539	48.5531	14.7018		24.2355	18.7967	44.9554	0.784323	5.38904	5.94134	15.897	1.49295	178.796	6.95962	0.616071	10.1951		7.22234	300.113		9.55932		0.427333	7.32029	0.92433	4.48387	27.3477	2.54951	0.0302683		69.1586		17.8968	3.70794	6.9524	73.1548	2.6803	177.672	7.95833	6.53499	6.976	28.3715		0.817671	40.4402	4.52221	88.2577	0.109511
Set983	35.174	26.4087	21.7895	18.2062		23.9359	22.8327	58.6431	0.980235	5.49408	7.49444	15.897		263.989	7.22734	0.537117	14.2625		2.76687			9.46655	39.3233	0.213599	5.9569	0.748717	5.4126	16.0376	2.311	0.0435683		70.91		21.0022	3.84608	2.01107	25.652	3.75541	53.7439	7.77747	5.78013	7.47142	8.21714		2.28493	14.4007	2.88527	83.0284	0.0737956
Set984	114.816	6.43539	20.709	18.2062		27.7372	22.8327	34.0896	0.942191	3.43016	8.46268	17.9295	1.49295	69.3526	8.36604	0.477056	14.1954		2.76687	279.021		7.11904	36.1001	0.208484	8.68369	1.15737	4.0084	16.0376	2.6032	0.0453523	147.759	212.423		22.7586	4.41164	8.16582	31.0441	3.81476	53.7439	7.87746	5.51173	7.47142	6.53812		1.57553	14.4007	2.88527	173.208	0.0844382
Set985	38.5003	20.3646	31.5962	14.7018		23.9359	26.1852	71.9744	0.982369	3.72627	7.59344	12.3101	1.19983	183.913	8.28076	0.537117	18.1802		11.6778			7.11904	37.8822	0.208484	5.83287	0.748717	4.0084	15.0673	2.32183	0.0402038		69.1586		34.1742	3.70794	2.01107	29.2963	3.75541	53.7439	12.1916	5.78013	10.8707	6.53812		0.408836	19.9756	5.00636	38.5825	0.0733301
Set986	44.6829	26.4087	53.6595	18.2062		26.2264	18.7967	33.1195	0.863257	2.76867	8.98767	12.3101	1.19983	178.796	8.60957	0.686211	14.1954		11.6778		79.0718	7.78599	39.3233	0.208484	5.83287	1.58113	4.48387	16.0376	1.26566	0.0417842		212.423		17.8968	3.99359	2.01107	31.0441	2.6803	53.7439	7.95833	5.80275	7.45952	27.6427		0.657648	17.732	7.19645	58.4128	0.0878502
Set987	45.5257	20.3646	21.7895	14.7018		23.5144	26.0286	34.0896	0.863257	4.91616	4.26423	7.63173	1.19983	69.3526	8.36604	0.398109	16.9108		2.76687			7.11904	37.8822	0.208484	3.21069	0.748717	4.48387	16.0376	2.41969	0.0351795	147.759	70.91		26.395	3.75932	7.14109	31.0441	2.70553	268.201	7.79658	5.63981	9.61248	36.0389		1.32948	14.4007	3.32539	88.2577	0.0844382
Set988		6.43539	35.5613	14.7018		21.9528	20.7764	49.045	0.980235	3.43016	7.49444	12.3101	1.17614	69.3526	3.99419	0.46671	14.1954		2.76687	279.021	46.7608	10.7319		0.294582	8.96992	0.92433	2.4026	10.7516	2.311	0.0351795		220.36		24.5768	3.64917	7.14109	25.652	2.70553	231.932	7.87746	5.79144	10.8707	8.21714		2.35915	71.472	5.46381	93.9337	0.0733301
Set989		20.3646	31.3097	18.2062		23.5144	22.6611	34.0896	0.980235	3.43016	7.59344	16.2568	1.49295	69.3526	6.02126	0.398109	18.6115		11.6778	359.238	266.343	11.8296		0.230555	5.83287	1.15737	4.17741	16.0376	2.54951	0.0351795	211.245	212.423		27.6849	3.64917	11.097	31.0441	4.23061	231.932	10.7549	5.63981	5.10641	8.21714		0.657648	14.4007	3.32539	83.0284	0.0895017
Set990	275.957	20.3646	21.7895	14.7018		23.2586	21.9763	38.4968	0.784323	3.43016	5.21587	16.2568	1.19983	69.3526	6.95962	0.398109	8.99574		10.2107	300.113	79.0718	7.78599		0.230555	5.83287	1.15737	4.48387	16.8122	2.54361	0.0251246	221.347	69.1586	1190.86	22.7586	3.99359	2.01107	26.7772	4.29948	189.435	7.65687	5.78013	8.43289	28.3715		0.817671	17.732	2.88527	58.4128	0.0844382
Set991	181.342	28.6497	46.8896	18.2062		22.9963	21.9763	34.0896	0.942191	5.54631	7.51004	22.5511		183.913	6.72864	0.537117	14.1954		2.76687	279.021	84.6622	7.11904	36.1001	0.427333	3.21069	0.92433	6.82496	16.0376	1.28637	0.0251246		70.91		21.0022	3.64917	6.9524	25.652	2.70553	115.109	8.57751	5.63981	7.47142	40.5495		0.817671	40.4402	3.32539	31.0842	0.0733301
Set992	35.174	6.43539	31.5962	30.7662		22.9963	27.5409	29.282	0.549093	3.43016	7.49444	16.0853	1.17614	126.633	5.1065	0.50709	10.1951		2.76687	279.021	46.7608	10.7319		0.208484	8.62603	0.748717	2.4026	46.2461	2.41969	0.0251246		70.91	408.271	26.395	3.28053	2.01107	25.652	3.81476	115.109	9.37473	5.51173	7.45952	31.576		0.817671	14.4007	4.76429	88.2577	0.0733301
Set993	41.5916	6.43539	47.6799	14.7018		23.5144	20.7764	38.4968	1.59974	6.30434	7.49444	16.6425	6.06591	182.853	7.21268	0.398109	12.3961		4.17057		46.7608	9.23925	36.1001	0.208484	9.396	0.748717	12.8094	15.0673	2.36562	0.0302683	147.759	69.1586		24.5768	3.70794	7.29413	25.652	3.39892		8.8037	6.10755	8.58981	26.1098		0.408836	14.4007	7.5422	26.2761	0.0733301
Set994	36.8207	6.43539	57.0274	29.6301		24.5801	22.6611	49.7816	0.784323	4.78571	7.39543	15.897	3.69928	69.3526	6.14125	0.756352	24.362		4.17057	300.113	46.7608	10.9923	37.8822	0.230555	9.64282	0.92433	4.17741	23.8984	2.46969	0.0302683	147.759	71.9155	1190.86	22.7586	3.70794	2.01107	30.6617	2.68945	231.932	7.95833	5.78013	8.43289	26.1098		0.408836	19.9756	7.19645	38.5825	0.0870369
Set995	275.957	6.43539	21.7895	14.7018		28.7905	21.9763	29.282	0.850156	6.06092	7.59344	15.897	1.73818	69.3526	10.9182	1.05585	20.7572		8.85429	279.021	79.0718	12.1198		0.470466	3.21069	0.748717	4.33288	16.8122	1.26566	0.0351795		212.423		24.5768	3.70794	2.01107	30.6617	3.75541	115.109	2.95501	5.78013	6.976	6.53812		1.32948	14.4007	5.46381	26.2761	0.0895017
Set996	41.5916	36.7565	39.8356	14.7018		23.9359	25.1042	29.282	0.980235	3.43016	7.49444	16.729	1.73818	69.3526	6.72864	0.398109	5.03823		9.43942	279.021	46.7608	10.3341	36.1001	0.213599	7.32029	0.748717	4.66134	31.7513	1.26566	0.0402038		69.1586		25.1286	3.70794	2.01107	31.0441	2.6803	53.7439	7.79658	5.51173	10.7653	6.53812		1.6712	14.4007	5.46381	26.2761	0.0844382
Set997	35.174	20.3646	21.7895	18.2062		23.2597	21.9763	29.282	1.02615	4.96164	4.38824	7.63173	2.1769	173.678	6.14125	0.910391	14.1954		10.7588			7.11904		0.208484	8.62603	1.15737	4.0084	23.8984	1.26566	0.064592	221.347	171.69	1190.86	29.6678	4.27732	8.16582	76.5999	2.6803	186.621	7.87746	5.63981	6.976	6.53812		0.657648	21.8759	7.19645	26.2761	0.0844382
Set998		6.43539	21.7895	29.6301		23.9359	26.0828	29.282	0.863257	5.50261	7.49444	17.9295	1.17614	173.678	8.36604	0.398109	12.3961		4.17057		79.0718	9.46655		0.230555	5.83287	0.748717	6.82496	43.9437	1.26566	0.0351795		69.1586		29.6514	4.58302	9.66449	75.3275	2.70553	177.672	8.91785	5.78013	8.58981	26.1098		0.408836	66.3359	2.88527	88.2577	0.0733301
Set999	39.9284	20.3646	48.1469	19.9357		29.248	20.7764	33.841	0.863257	3.43016	4.38824	16.2568	1.50086	182.853	6.14125	0.537117	14.1954		10.2107		394.928	10.9619		0.208484	5.83287	1.15737	4.66134	32.291	1.00072	0.0435683	211.245	171.69	408.271	26.395	3.77153	9.41665	48.1872	3.75541	231.932	7.79658	5.79144	7.0537	28.3715		1.93322	40.4402	2.88527	58.4128	0.0870369
Set1000		6.43539	21.7895	14.7018		24.5801	20.7764	33.2478	0.863257	5.13144	7.49444	16.2568	1.23708	69.3526	6.95962	0.46671	5.03823	10.7767	9.43942		79.0718	7.11904	36.1001	0.505343	5.2887	1.15737	2.4026	16.0376	1.26566	0.0402038	147.759	78.1269	1190.86	26.395	3.70794	9.41665	29.2963	2.6803	231.143	7.95833	5.80275	7.45952	40.5495		0.657648	21.8759	4.92448	26.2761	0.0733301
[truncated: 30 more columns]

## Sheet: GOBP-11Perc
	acetazolamide	adapin	ajmaline	allopurinol	allylalcohol	amiodarone	amitriptyline	aspirin	azathioprine	benzbromarone	benziodarone	bromobenzene	bromoethylamine	bucetin	caffeine	carboplatin	chlormezanone	chlorpheniramine	chlorpromazine	cimetidine	ciprofloxacin	clofibrate	clomipramine	colchicine	coumarin	cyclophosphamide	cyclosporinea	diazepam	diclofenac	doxorubicin	enalapril	erythromycinethylsuccinate	ethanol	ethionamide	ethionine	etoposide	furosemide	gentamicin	griseofulvin	haloperidol	hydroxyzine	ibuprofen	imipramine	indomethacin	iproniazid	isoniazid	ketoconazole	labetalol	lornoxicam
Set1			40.3565	35.4856		26.5098	32.437	79.5518	2.37987	5.13144	7.39543	65.8585			13.2922	1.37473	12.3961		15.132			12.1528		2.21802	11.587	1.59568	24.7826		2.6032	0.0644112				6.74459	5.64215	9.84525		8.35347			16.0155	10.4431			5.96503		18.9908	145.75	0.0902923
Set2	46.3685		25.9796	29.3019		26.203	24.7655	126.004	0.982369	4.33493	6.77767	26.8945		259.293	5.74617	0.46671	5.03823		2.61943		266.343	12.4461		1.56362	4.3428	3.06795	19.6544		2.42025	0.0869914				23.3304	5.67591		89.4387	6.21326	321.152	12.8703	11.9253	13.1504	30.9448		2.45342	43.8292	5.69468	97.3146	0.0844382
Set3			48.1469	63.59		23.165	36.9493	29.204	1.59974	5.64919	5.21587	16.729		69.3526	16.7279	0.923336	19.8377		18.6462			9.00815			5.44083	3.12438	18.5308	12.873	2.56968	0.0302683					3.28053	14.0832	88.2247	6.96655			15.662	7.47142	43.0664		4.37816		7.19557		0.0558137
Set4			105.449	53.7064		30.7459	32.437	75.1989	1.51869	5.22704	10.4651	68.686	5.30084		27.3093	0.74285	21.4242		4.17057			9.55932	62.5651	2.08506	8.72987	2.99464	26.8803		2.74417	0.183114				16.8869	4.58302	14.5725		6.29172		11.8283	19.6293	14.1035			4.28175	48.8961	5.00636	114.336	0.127288
Set5			20.5662	31.6183		24.5217	18.6487	84.1668	1.10593	6.02838	7.83397	38.7375			12.426	0.740592	14.2625					11.4805	40.0384	1.24001	11.9082	2.39417	6.11449		0.815374	0.0487082	182.126		1643.98	23.3304	5.06758	10.7085	80.9243	6.8441	227.759		5.80275	14.1035	40.3495		4.92362	66.3359	6.66849		0.238784
Set6		30.1735	59.6312	51.2041		21.4125	49.9569	71.5131	1.59974	4.4096	12.8882	15.9139			21.5283	0.756352	23.6024					8.05017		1.68792	10.0095	1.18812	21.1239		2.56968	0.0671363				26.395	2.90445	10.0262		4.23061		15.3952	7.48934	15.8478			3.62419	62.6281	13.1218	58.4128	0.151277
Set7			65.943	38.8998		30.7339	35.0324	79.811	0.977652	4.78571	7.39543	33.5754			14.7805	0.616071	21.1429		4.17057			11.4423		1.52825	8.91307	0.748717	4.0084	70.7762	2.55043	0.0671363					3.70794	2.01107	16.396	4.02394	282.847		10.6063	8.58981			4.37816		25.1321	131.244	0.211352
Set8	275.957		58.9864	29.932		27.6025	22.6611	102.716	1.18961	3.72627	10.4556	61.7237		173.661	7.33111	0.616071	10.1951		12.5187			15.4992		0.303648	15.8912	2.39417	9.98607	51.7588	2.23535	0.0897819			1789.52		2.94688	11.097		4.02394			6.01196	10.4431			2.14756	19.9756	23.3337	46.0807	0.127313
Set9	160.71	20.3646	37.7245	37.5195		23.165	26.5188	61.547	2.51771	3.43016	6.77767	25.5777			10.3382	0.403903	20.456					15.1035	40.1587	1.45986	16.2439	2.79202	21.1301	64.4429	2.9974	0.165007		300.348		3.51032	3.81162	21.2067	80.9243	5.18658		11.7677	8.1653	18.0755			0.408836	110.133	8.58012		0.0878502
Set10		38.6049	38.8586	36.2081		26.3399	35.9275	120.32	0.784323	5.52881	19.7272	15.9139			18.8981	1.3067	22.3325					17.3252	37.8822	0.303648	9.44137	2.46861	6.19412	43.9437	2.82035	0.107183	211.245			17.0763	4.59169	7.5185	88.2247	7.45561		12.1916	6.2988	33.2773	41.7806		3.62419		5.00636	125.149	0.17721
Set11	42.6007		98.4522	43.5058		30.7339	36.0839	34.0896	1.2055	7.31386	10.0388	68.686	4.24648	69.3526	11.8402	0.652217	11.2153				54.9563	11.1001		1.0944	8.91897	2.63024	26.789		2.6032	0.131144				17.702	4.84488	7.32979	88.2247	7.77762			5.70884	9.47695			0.910345	71.3794	25.1883	66.9391	0.233764
Set12			66.0908	33.9025		21.4978	37.0863	31.2159	4.37926	5.90051	7.39543	85.3418			24.3563	0.923336	24.0971					5.74129		0.359521	13.7296	1.59568	4.66134	74.8813	2.23535	0.131144	182.126	70.91		23.3304	3.77153	9.26542		5.91871			14.401	10.254			1.49105		13.1635		0.220041
Set13			67.9682	31.0802		23.9359	37.0572		1.5575	11.7246	9.75789	95.3895	2.1769		26.2453	0.398109	12.4786					9.00815		0.99017	7.15152	1.18812	25.1808		2.72413	0.079266			408.271	17.702	4.1339	12.8767		16.5451			12.9796	20.6794			8.35847	60.1377			0.0810281
Set14		24.9477	47.6799	47.1		35.8686	26.5188	34.0896	0.980235	4.33493	6.77767	66.8576		253.726	22.2532	1.37428	11.2153		13.6864			14.8517		0.343061	21.3954	1.66728	19.6544	41.0638	2.72822	0.0921417					3.58646	15.1794	48.1872	6.21326		11.8283	10.9399	15.8478	7.44207		4.03395				0.263804
Set15		26.9198	74.4965	29.932		29.9373	26.5188	128.942	0.942191	6.61367	18.8958	26.8945	2.67077		17.3793	0.74285	11.3046		10.5626			11.5511		1.40351	3.21069	2.91214	22.8605	39.7002	2.54361	0.113879				32.5324	4.2947		73.7337	6.21326			5.63981	10.0723	33.9041		3.62419	73.7341	30.4799	23.8588	0.209213
Set16	46.2715		36.0911	30.1332		32.5106	28.2051		1.10593	6.61367	7.42665	87.255	4.84602		7.25063	0.616071	19.8022		9.06174			12.1591		1.29252	8.00944	1.32209	17.7051	56.2346	2.78159	0.0385853					4.51622		81.5862	4.02394			30.1958	8.58981			3.05212		5.5812		0.0878502
Set17			75.8184	30.2121		32.564	34.6251	96.5285	1.83727	6.30434	6.13189	14.3552			8.28076	0.616071	28.4701					10.8795	38.7707	0.33162	19.3467	2.20129	8.00254		2.54951	0.0543341					0.465205	13.4167		16.6902			6.2988	10.0723			5.1466	75.9722	5.00636	97.9942	0.109511
Set18			73.0436	32.7101		30.7339	24.4268	31.625	1.14949	5.22704	7.59344	16.2568	4.81929	265.735	22.6558	0.923336	18.2931					10.7319		1.685	8.62376	2.39417	9.79911		2.83094	0.117229		69.1586	395.736	33.5455	5.67591	7.32979	22.0245	5.18658			4.47998	8.58981			4.03395	21.8759	13.1635	80.2083	0.0895017
Set19		29.8753	65.1262	33.3975		47.2874	29.5655	87.8968	0.980235	2.76867	10.9405	18.336			21.5283	0.878072	16.9057		13.2874			10.4678		1.45986	19.1022	1.18812	7.97533	83.9192	2.6032	0.0543341			1114.07		3.75932	25.6454	16.396	6.64744	296.467		6.53499	15.8478	44.9187		0.817671	62.6281	3.32539	339.003	0.0733301
Set20	38.5003		137.859	30.1332		36.4314	8.67791	109.962	1.64893	4.33493	7.59344	24.1388			7.71052	0.548082	14.2625		7.83388		266.343	12.7742		0.965931	8.00944	3.24778	34.213		2.96595	0.0671363		56.6161			4.50313	9.84525		5.59076		8.57751	6.10755	10.8707	28.3715		5.1466	85.6085	2.88527		0.20829
Set21		34.5122	65.5625	23.6667		28.7905	41.0303	46.6882	2.31739	7.52431	11.4325	30.7032			23.4245	0.46671	18.6347		15.132			9.01195		1.40351	8.00944	1.18812	4.66134	69.2703	2.99088	0.0543341		269.925	1348.03	29.9824	2.74807			4.4448			4.47562	6.99172			4.92362		5.00636		0.0810281
Set22			67.7788	41.9023		39.1732	27.5409	49.1357	2.09439	5.98249	9.21763	65.8585			18.2423	1.02591	24.1951					8.68752		0.303648	9.89442	1.2354	15.6485		2.72413	0.0433572	544.626			13.7513	5.41311	8.16582	75.3275	6.12938			10.6475	7.30369	47.7794		3.02855		8.64443	108.322	0.22378
Set23			71.8937	32.5496		26.9635	27.5409	91.876	0.606771	4.33493	9.28229	15.897	1.49295		23.9797	1.37979	139.097				344.718	7.78599		0.320019	12.9999	1.42113	9.79911		1.5934	0.0417842				17.702	3.77153	15.9861		9.24808	295.164		6.01196	21.4731			7.75313		43.2327	116.483	0.0844279
Set24			56.6103	37.8114		24.5801	29.5655	49.1357	0.982369	8.73775	7.59344	16.2568	7.72021		16.4298	1.19632	31.8279					11.4805		1.94931	14.6381	0.748717	16.0708	49.0132	2.5686	0.117229				29.2034	4.69611	15.9997		3.55941	458.757	7.65687	15.1234	7.16838			5.97506			58.0988	0.20341
Set25		24.5724	33.9837	41.8816		19.2797	29.5655	87.518	0.980235	6.30434	8.07451	33.5671			7.68584	0.788434	19.0347		4.17057			11.4805	40.1587	1.19612	26.4925	1.56506	5.75339		2.63276	0.0564433			393.853	28.2983	4.5084	12.424	30.6617	4.06553	293.931	19.5715	8.20835	31.9039			2.76811	65.191	31.7451	23.8588	0.0870369
Set26		33.4449	30.8685	29.4449		28.6856	33.7559	32.6782	6.21031	4.30919	16.6841	32.1352	1.4969		4.77195	0.548082	17.8797		7.83388			10.3341		0.359521	12.3125	4.07025	21.1301	15.0673	2.52501	0.0777225				36.1484	4.51622		98.4406	4.2666			16.6045	41.8642	50.0889		1.53865	71.3794	5.5812	58.4128	0.119732
Set27		6.43539	42.4846	47.7625		21.4978	42.8859	93.4229	1.21857	4.08588	15.5642	23.7059			7.33111	0.475992	8.99574		13.6226			9.47711		0.33162	8.12753	1.85817	24.8632	24.0335	2.25073	0.100894				34.1742	4.01121	11.2183	73.1548	3.21559	78.3672	7.79658	17.1347	15.8468	33.4887		6.6292	54.6043	8.12254	31.0842	0.0878502
Set28			68.1168	30.1332		36.1143	42.8859	90.5378	1.2055	5.49408	7.10216	65.0292			10.0529	0.436037	29.5595		18.8383			23.0546		0.381556	26.4925	3.5256	6.82496		2.64419	0.193998				46.2563	3.99359			5.15502	78.2536		21.6038	9.4133			1.05943	21.8759	3.81891	46.0807	0.202627
Set29	36.8207	6.43539	40.6275	34.345		24.5801	26.5188	45.4193	1.65145	4.43009	5.09761	23.7059	4.84602	394.57	11.6526	0.616071	21.5796		14.1957			9.46655	38.7707	0.294582	8.68369	2.78293	4.48387		1.00072	0.0579375		336.466		25.1286	6.23727	27.8635	108.865	6.29172		7.79658	5.63981	12.7364	36.0389		7.1944		22.7556	149.345	0.187376
Set30	38.5003		58.7114	46.3646		36.4953	10.2373	63.2174	0.982369	11.2668	10.4651	61.096			10.4495	0.616071	18.2931		4.17057			10.8238		0.303648	8.62603	2.12804	25.3428	72.7446	2.71067	0.106621				32.5324	4.84488	11.7921		6.54732		11.099	26.0795	15.7144			2.06332		38.2003	66.9391	0.047023
Set31			67.1852	50.8688		9.1152	32.437	45.4193	1.80021	3.7917	2.22498	43.7863	4.07658		5.67222	1.37473	28.2172		18.6462			6.40482		1.42772	19.2591	3.60669	5.71	41.0638	3.1827	0.0946449					4.41072	12.3791	80.9243	2.6803			6.57884	34.7637	41.0581		2.44157	21.8759	24.7837		0.131034
Set32	44.6829	29.8753	90.56	44.1859		24.3853	25.4361	81.1861	1.77432	6.30434	9.28229	39.2602			14.7805	1.05826	18.1802		16.2508			12.4461	63.6594	1.51728	13.7296	1.31343	8.53416		2.96595	0.0565236				21.3711	4.4242	12.8767		6.96841			15.8411	15.7144	41.7806		2.35915			76.0162	0.0878502
Set33			67.1535	52.5544		32.9917	43.2116	58.8595	1.21857	5.80292	10.8134	64.5642	1.29945	47.25	7.68584	1.42809	34.014		11.8269			12.8009		0.393975	11.587	1.15737	19.2701		2.66235	0.0869914					4.41072		55.8539	6.16416	231.932	19.5715	10.4987	33.2773	50.3481		4.28335	77.5043	9.56959		0.281486
Set34			20.5662	18.2062		28.9494	25.4361	72.2209	3.32534	9.32767	6.77767	64.5642			12.3956	0.398109	18.1802					12.4461		1.30483	40.022	5.92411	4.48387	15.0673	2.17934	0.0688953	260.79			56.3064	3.70794	9.86941	111.195	5.55785			4.72465	28.7794			3.65719	71.3794	13.1635	88.2577	0.0737956
Set35		33.5995	36.4975	36.7476		26.3399	30.0315	41.4243	1.29524	2.76867	7.39543	65.0292	6.38728	110.015	9.1921	1.01092	5.03823	7.83154	2.76687			8.80922	68.1206	0.37727	5.2887	1.31343	4.98034		3.22283	0.0225787	56.2712		1348.03	5.947	5.58459	8.25194	23.4651	3.39892			7.83493	10.254	44.8796		3.92469		5.5812		0.20829
Set36	38.5003	28.6075	69.8145	46.3646		19.2797	26.5188	34.0896	1.63631	4.70088	7.42665	18.336		54.602	10.4495	1.21507	5.03823	11.8864	2.61943	279.021		11.1001		1.59478	3.21069	2.78293	4.66134		2.55043	0.040131		300.348		21.0022	0.465205	6.64893		8.35731		10.9576	4.72465	32.4154	26.1098		2.35915	115.636	42.9815	102.628	0.0844382
Set37			36.0911	38.282		26.3399	23.7899	120.32	0.699234	8.68748	19.1241	69.8671		259.558	17.4103	1.60282	59.1133		20.8692			23.454	34.9434	0.208484	12.7184	2.79202	29.9895	85.4702	3.01687	0.0946449					5.41216	11.8571	158.85	4.96656	100.547	12.1411	7.74982	33.1503	45.2107		3.70693		28.9585	83.0284	0.171775
Set38			53.6595	33.9025		32.0872	28.1464	79.811	0.982369	4.78571	7.39543	46.2332			16.2889	0.77568	18.6347		18.1658			5.97215		0.427333	6.85189	0.959601	3.05555	23.8984	2.22341	0.0367989	147.759	296.127		29.9824	4.9102		96.1363	5.1448		10.8023	10.2021	8.58981	28.3715		0.657648	85.8592	4.57593	88.2577	0.0972562
Set39		33.4449	53.6595	37.1459		26.5098	25.1042	50.0701	1.158	6.77419	10.8262	29.2052		164.323	38.5435	0.74285	12.5314		13.6864			11.4205	40.0384	1.14686	8.68369	3.96083	4.99858		2.54361	0.117229				26.9875	3.70794			3.45746			15.1234	17.0662	41.0581		4.48378	71.3794	6.66849		0.233764
Set40			67.1535	23.458		37.8062	36.8554		6.07677	15.2569	7.02736	30.3608	1.62985		12.7486	0.398109	6.32876					15.3726		1.40351	13.4505	0.826821	8.53416		2.95423	0.161275				21.3711	3.99359	1.31484		4.2666			16.9117	6.63443			4.28335		48.9175		0.0927662
Set41		35.0316	89.4823	29.3019		23.2597	44.5767	39.1416	1.77432	5.13144	4.38824		5.13977	69.3526	16.4298	0.77568	5.03823		2.76687			8.71285			9.67836	0.835155	4.66134	53.3381	2.83094	0.0340511				23.3304	4.1339			10.3637			23.9278	10.0723	38.0151		3.12842		19.8733		0.0870369
Set42		37.4648	47.8219	37.8114		26.3399	10.2373	84.5024	1.48454	5.92532	13.5	27.9692			8.28076	1.19106	17.8797					8.05017		1.74222	8.96992	2.39417	6.03557	68.5938	1.83219	0.0417842				28.2983	5.32656			6.12938	53.7439	10.316	7.79652	46.488			7.3258	74.4419	13.1635	58.4128	0.1616
Set43	36.323	28.6497	68.1305	37.2435		26.383	20.7764	84.1668	1.18961	5.94591	7.39543	45.0935	4.74873		12.3956	0.724461	33.1727	22.1153	11.6778			5.97215		2.46375	11.3413	2.46861	15.6485	16.0376	2.5686	0.0749466			408.271	31.0372	0.465205	12.2572	113.829	18.6167			6.00478	10.4431			3.62419		23.3337		0.0807134
Set44	48.2912	28.0307	74.4965	32.7413		34.7834	35.2198	54.0955	1.02615	6.77419	9.28229	50.9272	6.41538		7.68584	1.12073	41.8116		15.6523			12.4461		1.63008	7.34353	1.15737	9.29422		2.46969	0.045656				8.0315	4.38053	7.55615		5.86507	230.353	7.79658	23.315	15.7144	45.2107		2.35915	30.71	5.69468
Set45	52.9355		39.7108	38.4865		26.2264	34.4832	39.8408	3.23425	5.22704	0.908601	40.0662			8.28076	0.853231	21.1429					19.2608		0.427333	12.8436	2.39417	19.9876		1.26566	0.142757		69.8481		21.3711	3.75932	12.8767	111.195	6.16416			12.9796	21.2825			6.40409	64.9114	6.66849	159.72	0.0878502
Set46		31.6974	16.8583	14.7018		10.5441	26.5188	46.6882	0.980235	2.76867	7.59344	62.2047			5.20496	0.955206	20.456		4.17057			11.4805		1.0405	10.5534	1.15737	4.17741		2.64937	0.0507678		77.6019			4.09286	11.5191		11.3082			6.01196	14.3449	24.7138		5.7988	71.5027	22.6333		0.0867118
Set47			53.6595	44.0675		29.9373	27.5409	45.4193	1.58002	4.36913	10.4651	16.6425			7.68584	1.41512	18.1802		22.4718			13.3959			8.12753	2.79202	28.2569		2.55043	0.123157	164.279			45.0489	5.58459	7.32979		3.75541			11.0929	10.8707			9.74695	89.3791	44.2973		0.0810281
Set48	36.8207		89.4823	28.0038		26.9057	31.2116	91.876	0.982369	3.43016	7.02736	31.4811			9.28646	1.45848	9.14408		11.9773			9.46655		0.294582	8.68369	2.46861	16.3982		1.28637	0.0433572		68.7861		25.0592	5.62216	13.5047	83.7044	7.59459		9.83698	6.3335	10.254	39.8722		4.51543	70.6365	24.0789		0.151277
Set49	36.8207		64.0427	37.5903		28.0092	25.1042	59.0333	1.8557	5.22704	10.4556	45.062			14.6365	2.00316	24.7997		14.1957			10.7319		1.21524	17.7603	1.15737	15.6485	62.5247	2.69408	0.0302683				36.1484	5.39793	11.4037		9.31577			10.9581	8.58981	54.4729		3.62419	19.9756	40.4984		0.0601766
Set50			57.0274	45.9177		26.2264	10.2373	49.1357	1.02615	4.08588	10.8134	19.2444	2.1769		7.68584	0.62528	28.4701		7.83388			14.5844		0.86024	28.731	3.71053	19.6692		3.81148	0.100104			1430.69	34.1742	4.01121	10.7936	48.676	5.68123			13.8841	23.696	37.4918		3.02305			106.115	0.109511
Set51			81.2521	44.7614		32.9917	30.2903	80.1505	0.850156	9.21354	10.8262	107.739		62.395	19.1823	0.674031	18.6115		12.7694	300.113		22.5658		1.42324	9.78713	3.15881	5.61221		2.46969	0.171046			1932.51	3.23806	5.23928			3.75541		3.7219	6.3335	8.58981			3.70693	77.5043	20.3652		0.0844382
Set52	46.2715	57.4071	48.872	45.0421		29.248	44.2086	66.3356	1.80021	3.43016	8.46268	35.1073	3.10522		15.1354	0.74285	30.397					11.4805		1.56899	5.61405	0.748717	5.18696		2.71748	0.153363					5.49126	12.7551		6.15215		8.57751	10.2021	23.696			2.76811		5.69468	390.472	0.17161
Set53		32.2351	53.6595	37.5195		31.9859	22.6611	49.1357	1.07801	8.73775	7.51004	68.686		284.927	21.2223	1.12845	22.6832					10.5199		0.470466	14.9306	3.06795	4.33288		2.92453	0.040131		68.7861			3.77153	9.15082	73.1548	5.18658		9.83698	6.3335	32.998			4.79669				0.0844382
Set54			56.1335	23.6667		31.8084	4.83917	96.0518	0.606771	2.76867	5.21587	16.2568	1.49295	355.894	13.031	0.633548	38.873					15.5267	36.1001	1.37156	10.001	0.748717	6.82496		2.5141	0.077282		171.69		17.702	3.39286	8.53167	83.7044	6.7102		11.0926	15.662	10.8987	50.6917		4.70531		25.9749		0.0844279
Set55		42.1889	85.2172	38.8998		34.5904	29.5655	39.8408	0.754526	5.53867	9.05665	26.8945	3.15853	253.726	19.1823	0.955206	14.2625		4.17057			10.8238		1.62595	9.396	3.12438	8.00254	16.0376	2.98392	0.0487082				16.8869	4.59169			7.45561	230.353		6.2988	14.3449			3.55272	53.1422	4.57593	88.2577	0.0737956
Set56	61.1881	75.1832	31.3097	19.0849		27.7396	23.7044	39.1416	1.01846	1.47578	5.21587	33.5754	2.1769	122.819	6.80139	0.548082	18.1802		12.5147			9.47711		1.72575	8.68369	1.59568	6.19412	49.0132	2.71067	0.0302683				29.2034	3.70794	9.84525	124.344	4.02394		19.5715	10.4987	6.976	40.5495		2.35915	132.32	13.5344	182.999	0.0617043
Set57		28.7192	48.3372	30.2121		25.5668	38.68	126.444	1.96041	4.43494	8.46268	29.2052	5.21724	110.015	25.3353	0.724461	35.5683		8.08006			11.4205		0.807022	8.96992	1.78055	10.1466	111.999	2.7898	0.123135				28.3951	5.31798	14.0832	96.1363	5.15502		11.7677	7.79652	23.8834			2.80834				0.180895
Set58		40.9457	56.1335	45.3131		18.4737	26.9531	110.824	2.08015	9.26518	9.35015	67.7181	7.34982	173.678	14.1719	1.19106	23.5474		11.6778			16.1584		1.31888	8.91307	2.54227	22.1035	16.8122	2.61295	0.0570977				29.2034	3.70794		66.6309	2.6803	95.7625		5.71628	9.4133	42.3708		1.05943	62.6281	4.33998	26.2761	0.0807134
Set59			64.0427	38.9308		33.0617	10.2373	21.1314	1.80021	4.03738	7.42665	30.7032			16.4668	0.633548	11.771		12.5187			13.9105		1.2017	18.494	3.2397	27.6838	64.4429	3.19486	0.106621	221.347			17.8968	5.41216	10.7936	68.8573	4.33844	177.394	11.0172	6.2988	15.061			0.408836		24.6548	114.336
Set60	36.323	35.0316	20.5662	41.9711		33.9452	11.3575	31.4423	0.980235	5.38904	8.98767	16.9885		263.989	5.13624	1.83528	12.3961				41.3618	11.0369		1.65509	3.74984	2.79202	5.79787	16.0376	2.54951	0.139769				27.7829	5.24914	15.6505	31.0441	6.21623	52.7518	7.65687	6.57884	13.0974	36.0389		1.30528	72.0918	8.12254	120.038	0.0878502
Set61			41.3132	37.4401		27.6025	41.4258	46.6882	0.980235	5.54631	7.59344	19.2444	1.23708	218.833	6.70656	1.01092	8.99574					11.4805		0.320019	7.34353	1.18812	24.2304	24.0335	2.36064	0.045656				25.4215	3.70794	12.8483		7.53716		7.95833	8.96632	13.311			4.48378		22.7556	58.0988	0.221027
Set62	38.5003	28.6497	13.1503	34.345		40.6	28.1464	91.3645	2.75709	9.73414	12.05	30.3608	1.50086		5.78264	0.686211	18.2931		11.6778		63.771	17.9378		1.65226	8.62603	1.42113	6.77141	18.4641	2.29086	0.045656		165.356		28.3817	4.8614	11.5147	88.0733	4.33844	95.7625	11.8283	13.6928	10.254	62.0169		5.96503	121.834	30.0232		0.0733301
Set63			112.868	30.2121		31.8084	34.303	85.0837	0.549093	4.78571	12.8882	75.14			5.74361	1.71046	20.7572		12.4136		65.8899	12.5145		1.78364	9.89442	2.63031	5.75339	58.4383	2.78374	0.0638849				35.1854	4.33921	13.16	31.0441	11.1265	53.7439	7.65687	6.2988	29.5812	36.0389		0.969342	69.4284	4.33998	31.0842	0.17721
Set64			66.5575	31.0361		31.8084	31.9043	35.1106	1.38082	3.02412	10.9405	72.819			12.1029	0.960531	18.7971		16.1596			5.97215		1.68639	12.7184	2.88479	10.1466		2.5686	0.0923052				21.3711	5.57638	7.68635		6.16416		8.8037	5.70884	15.061	39.5934		5.42046	18.9268	7.19645	152.94	0.0733301
Set65			48.5531	34.5342		29.5263	4.83917	54.7116	0.980235	3.02412	10.4556	69.6722	3.54546		8.84201	1.05826	18.1802		4.68477		47.7429	10.9619		1.19612	12.1375	1.28095	6.90764	77.0088	2.69156	0.0507678					3.69494	15.569	78.719	5.88556	86.5872		16.6045	32.3356			2.97182	66.3359	19.0189		0.251173
Set66			31.3097	47.0384		28.7905	34.4285	91.876	1.2055	4.96338	8.85614	87.2867			13.2922	1.12073	101.861		14.3901			11.7866		1.77892	7.90032	1.56506	34.6542		2.44431	0.0402038	240.666			46.4485	4.50313	11.3146		4.96656			16.6045	32.3356			3.1999		35.7394	46.0807	0.0891422
Set67			108.284	40.7624		21.4083	27.881	91.876	0.977652	4.78571	8.69694	53.3433			12.3956	0.398109	19.0347		10.7588			10.9619	68.1206	0.359521	9.04467	2.20129	6.19412		1.78767	0.131144				31.0811	3.99359	12.424		5.42564			4.72465	10.254			11.8362	48.8961	8.51581		0.10335
Set68		36.1926	59.2747	40.7716		32.5106	26.246	17.8486	0.754526	6.07999	11.9825	61.096	5.22166		7.21268	1.83973	14.1954		13.9092			13.8579		1.40576	7.34353	1.65163	4.48387	64.4429	2.54361	0.067855					3.58646	9.75247		5.15502		8.9603	15.8942	10.3087	41.0581		6.91133	49.4236	22.7556	98.4786	0.109511
Set69	38.5003	36.1926	26.357	30.1919		23.9359	26.5188	46.0037	1.62837	6.77419	7.42665	26.8945			11.0779	0.548082	11.3046		16.2508			9.46655		1.56899	3.21069	1.42113	9.79911	83.0066	2.78159	0.045656		300.348		6.74459	0.465205	6.28215	89.4387	3.55941		8.9603	15.0502	41.0387	35.6806		0.817671	76.4331	3.32539		0.0878502
Set70			107.526	52.6151		24.5217	26.8784	90.3565	0.927279	9.26518	16.5034	46.2332			8.28076	0.477056	21.291					16.1091		0.294582	15.9768	0.92433	24.6223		2.63979	0.0704943				25.8596	3.81162	13.5635		5.55785	346.901	11.8283	8.59705	18.0755	28.3715		3.58499				0.0895017
Set71			66.3811	31.2074		30.2642	38.68	31.4423	1.18961	9.21354	8.07451	75.3378			26.2453	1.45272	35.8768					15.5145		1.56362	9.27114	4.12267	5.41668		2.46969	0.163075				37.4729	4.86585	12.391	103.666	5.15502		9.83698	10.9581	29.7302	36.0389		2.02031	87.9828			0.190075
Set72			42.264	36.2081		25.5668	25.4361	16.7419	0.927279	7.20133	16.2238	110.37	5.15324		13.2922	0.724461	22.6832	7.83154				22.1229	44.5473	0.359521	8.12753	3.06795	27.0243		2.69408	0.0417842			408.271		3.70794	6.9524		6.23512	282.847		5.78629	12.7474	77.9963		2.35915		8.12254	93.9337	0.0733301
Set73	275.957	28.7192	64.0427	47.498		28.9467	38.3566	53.4832	1.21857	4.28871	7.39543	29.2052	3.32321		29.1407	2.2735	31.8279					9.53002		1.65509	26.2549	1.18812	5.29998		2.42025	0.0995089				41.1816	4.41072	12.7551		5.42564	164.426		6.53499	7.47142			3.58499	62.6281	19.8733	26.2761	0.251173
Set74	67.3085		31.3097	33.3975		25.2605	22.6611	59.0333	1.0206	9.32767	10.529	46.2332		259.293	36.0269	1.48914	17.3093		13.5724			14.1717		1.21807	3.41748	2.39417	21.5288	16.0376	2.53836	0.0923052				23.6986	4.5084	15.1794	91.8406	5.30201			6.36629	7.44762	31.7851		2.35915	75.5818	4.57593		0.180895
Set75		30.3263	68.1305	41.5361		26.3399	49.8765	38.4968	3.80459	9.97339	13.6851	72.4479			7.33111	0.923336	17.9702		13.2874			12.1528		0.208484	8.77285	1.42014	6.61676		1.26566	0.0757791		64.5627		29.9824	5.16967			6.96841			9.78399	45.971			10.295		5.5812	116.483	0.0767362
Set76			53.6595	50.9979		12.6016	33.5168	17.8486	1.21857	5.94591	16.2818	63.3131	4.07765		10.4557	1.43897	10.1951	22.6738	36.4539		277.364	17.3252		1.0944	5.90622	2.05803	4.33288		2.54951	0.0940849				38.5232	5.57638	15.1794	98.7667	3.45746	293.931		8.1653	13.0974	39.5072		1.93322	21.8759	2.88527		0.17721
Set77			65.5625	38.4865		25.2605	12.1395	83.3215	1.18961	5.88222	8.30485	27.2333	1.50086	385.26	17.026	0.923336	25.4128		13.9885			12.9157		1.48752	8.12753	3.16404	6.61676		2.55611	0.141203	56.2712			34.5673	4.68606	13.2704		6.12938		12.8703	17.1347	15.061	26.448		2.45342	75.9299	13.1635		0.109511
Set78			71.2883	30.2121		24.2355	27.0558	21.1314	1.77432	4.70088	4.3016	69.8201			16.8163	1.05585	14.1954					9.46655		0.294582	19.1852	1.18812	28.8568		3.04668	0.0351795			395.736	16.8869	2.66491	13.2704	83.7044	9.24808			10.9581	10.7653	32.9231		2.14756			135.867	0.172267
Set79	145.801		48.1469	41.6992		31.9612	33.5112	73.9448	1.20409	5.94591	12.8882	16.2568		263.989	9.1921	1.36751	24.8259		14.389			14.1717		0.559944	12.2243	1.42113	19.8422	63.3627	2.5686	0.0671363	46.9166	250.664		25.1286	6.08992	10.7936	101.881	5.42564		11.8283	23.315	10.0723	6.53812		3.62419	30.71	31.1531	58.4128	0.0870369
Set80		35.0316	47.6799	23.7834		29.9373	16.4492	33.7455	1.18961	13.3136	9.18761	63.2925			17.026	0.740592	11.2153		10.2896			15.8239		0.641982	10.5534	0.709008	30.5533	63.8064	2.5686	0.0351795				56.3064	3.75932	10.0811		25.993			6.53499	10.254	35.6806		1.49105	70.6365	25.9749		0.220041
Set81			31.3097	40.8017		26.2264	25.1276	100.59	0.982369	11.2191	14.5346	19.2444	4.07658		54.9036	2.18852	23.5474		19.3185		47.7429	15.6982		1.40351	9.09993	3.79149	4.0084		2.78374	0.0956347				25.6348	4.27732			5.78433	231.932	12.1916	8.80479	7.66865	33.5242		2.41205			75.305	0.0547607
Set82			53.6595	48.7253		34.5904	27.881	89.489	1.17536	6.61367	13.5	41.8489			5.78264	1.37473	24.362					10.8238		1.85792	10.001	2.39417	5.71	49.0132	2.6032	0.0351795			1789.52	37.4729	1.64547	14.0832					5.80275	29.0647	40.3495		1.93322	81.3083	8.51581		0.0664951
Set83	46.3685		65.1262	36.2081		28.9467	27.0558	91.876	1.05969	5.98249	20.0316	47.7811			5.20496	1.37473	19.6147		41.8528			17.4548		0.821634	6.42234	0.745979	19.1267		2.02773	0.0402038				76.0225	4.89824	10.7085		2.72223			8.79596	15.061			0.613253	19.9756	5.69468	145.75	0.0988205
Set84			53.6595	38.8998		28.9467	34.6251	28.3494	0.980235	7.51785	10.8262	64.337			17.026	1.18616	28.2172		36.0344			10.4899		1.45986	10.5534	3.41325	5.18696		2.8044	0.112896					2.9826		26.7772	5.32304		7.65687	5.65597	17.1802	36.5957		4.48378				0.0844382
Set85	46.3685	40.763	45.529	44.7614		23.2566	12.1395	100.864	0.980235	5.49408	10.4651	64.9306			6.89622	0.868401	13.8667					10.7319		1.42311	9.44137	1.46491	19.2101		2.71748	0.0570977				5.45086	5.00727	13.7619	26.7772	14.8396			5.78013	12.9899			6.19886	74.3866	7.19645	396.543	0.0972562
Set86	61.1881	33.4449	30.8685	34.99		22.0102	35.2198	46.0037	2.56379	6.30434	14.7934	87.8048			10.051	0.657054	17.8797		16.1596			18.6493		0.970445	36.3858	1.50539	17.0471		2.79641	0.0565236				74.7181	3.15283	13.2704	91.7371	4.96656			5.80275	27.8051	50.3481		3.84709	71.3794	5.5812	80.4464	0.0737956
Set87		25.6163	112.868	31.0802	8.93325	28.9467	39.4928	49.1357	0.980235	9.3773	14.4554	23.7059			10.9182	1.01092	12.4786					17.5931	37.6554	1.63728	11.6667	2.46861	16.0103	16.8122	2.03809	0.142522		272.898		31.6616	5.57638	8.59524	22.0245	4.23061	231.932		16.9233	10.0723			3.02855		3.32539	136.027	0.187376
Set88	46.3685		87.8797	31.0802		30.7339	30.2903	100.066	1.69186	6.64585	11.812	37.3378		173.678	8.36604	1.05826	16.4062		10.5626			12.1528		1.56899	3.74984	1.59568	24.3837		2.72413	0.0507678					4.76119	23.7056	77.7759	3.84969	53.7439		5.75311	6.976	44.9806		1.97535	83.38	5.69468	158.256	0.0866786
Set89		25.6163	59.2747	40.7624		19.2797	35.9275	87.5987	1.77432	3.7917	10.4896	47.7811		64.8957	27.2024	0.537117	13.9979		12.7694			9.46655	37.8822	1.62595	8.96992	1.83294	37.6073	53.0703	3.33901	0.139769		171.69	1643.98	16.8869	4.5084	7.5185		7.53714	275.151	10.9576	5.20806	9.47695	41.7806		1.62624	62.6281	8.64443		0.194803
Set90			20.5662	4.53486		40.1342	20.7764	67.0735	1.0206	7.54627	9.28229	34.3295	2.1769		24.5419	1.51412	14.7578					11.1001	63.0317	1.69382	8.12753	0.92433	18.1851		1.26566	0.0683904					3.75932	21.2157	88.0733	6.29172	301.319		5.20806	9.61248			11.1278			326.439	0.0844279
Set91		24.5724	48.1469	43.2767		32.5106	21.9763	44.8112	0.784323	3.43016	10.8262	65.8585	2.3066	182.853	7.68584	0.616071	18.2931			279.021		11.8166		1.74222	8.91495	0.882951	6.98347		2.8044	0.064592		281.456	1412.62	36.0099	4.69611	20.3356		16.1857		11.8283	14.9137	6.90163	40.3495		4.21235	63.7488	30.0232	42.6624	0.0945564
Set92		28.6075	70.6949	30.1332		26.2264	26.12	42.1757	0.942191	5.54631	8.98767	56.9836		263.989	11.0779	1.60282	69.3223				445.121	12.5145		0.25409	11.6667	2.79202	4.33288		2.66235	0.0519606				34.1742	6.52008	26.6897	88.2247	6.50656	282.847	22.5777	9.02881	10.4431	50.3481		2.92059	65.191	23.3337		0.149291
Set93	36.8207	34.5122	118.202	27.1919		19.2797	34.4285	37.8022	1.61701	9.98557		89.1156			5.11399	0.853231	26.683		17.4318			14.5097		1.59425	9.78713	2.76828	4.66134	49.0132	2.57069	0.0565693				54.3378	4.89824		98.4406	5.68123			6.3335	14.1035			8.01361		11.1869		0.052938
Set94				30.2121		24.3853	38.676	70.679	0.549093	4.78571	3.05422	81.2116	1.49295		12.426	0.944429	16.9057					10.1015		1.1659	18.4212	1.31343	5.29998		2.72822	0.166289					3.70794			5.20143		11.0926	5.70884	9.47695	45.5304		0.657648	30.71	31.0464		0.0810281
Set95	275.957	28.6075	75.8184	42.3513		36.4185	36.6581	45.4193	1.07547	5.22704	9.51849	20.5364	4.81929		5.73118	0.398109	23.5474		10.7588		91.1069	6.90724		0.320019	19.3467	2.69492	6.61676	53.0703	2.64937	0.0671363		64.5627			4.97924	6.76906	88.0733	5.15502	268.201		15.1272	7.66865	40.3495		1.53204	82.4404	3.32539		0.0842818
Set96			49.4995	47.0384		32.5106	36.6525	68.6937	0.980235	10.1057	9.28229	30.3608			5.19693	1.19632	18.2931		13.1959			14.8517		0.320019	8.91307	1.8775	10.1917	15.0673	2.42025	0.0777225				48.4085	3.75777	9.86941		5.68562			6.3335	32.9078			3.62419	94.4691	2.52931	97.9942	0.0844279
Set97			95.2958	30.1332		28.9467	27.881	83.7273	2.09439	6.76173	20.0316	59.6277	5.27183		5.19693	1.84715	38.873		14.3041			11.8166		1.42772	11.3413	1.78055	4.75389		2.70302	0.0402038	259.984			32.5324	4.71215	7.29413		6.978		13.3205	6.36629	13.1841	46.116		1.30528	71.6355	25.5921	75.305	0.171692
Set98		24.5724	59.6995	14.3864		31.6643	32.437	31.2159	2.37987	5.81853	12.2593	48.2809	5.83615		7.33111	0.677091	10.7525		13.0551			17.5931		1.87834	11.6667	2.99464	5.18696		2.95051	0.151166				25.8596	2.54351	13.2704		3.10801			8.96632	10.8217			1.30528	71.5027	14.7214	119.848	0.119732
Set99			48.872	35.5005		27.7396	19.5365	38.4968	1.02615	8.73775	7.59344	30.7032			18.7123	0.955206	8.96106					10.4678		1.09459	18.494	2.64009	5.61221		2.9974	0.0704943		171.69		20.136	4.37505		68.8573	5.59076	95.7625	9.79145	12.9796	7.66865			2.06332	70.6365	25.9749		0.0972562
Set100	47.8805	75.1832	43.2243	37.4401		36.4953	11.3575	32.3979	1.59974	4.78571	5.21587	18.336		265.735	36.0269	1.19106	8.99574		2.76687			9.00815		0.360774	6.36024	0.92433	5.18696	16.0376	3.1827	0.131144				13.7513	4.84488	12.7551	91.3124	2.72223		7.79658	11.9253	11.9397			1.99292	83.38	27.5086	85.6662	0.0639706
Set101	47.8805		51.8768	41.9508		38.5981	44.5455	29.8958	1.89028	6.07134	5.83463	107.739			16.2889	0.548082	18.7971		13.5724			9.00815		0.358098	5.44083	0.92433	4.66134	24.0335	1.26566	0.0385853		54.3514		26.395	4.1339	13.16	111.747	6.12938		7.79658	17.5885	16.2679	40.5495		2.35915		30.0232		0.109511
Set102		29.8753	65.1262	37.5903		32.9917	33.5112	84.1668	1.02615	5.49408	11.9825	61.096	6.22332		6.03143	0.616071	23.7038		16.2052			14.8517		1.33962	19.8655	0.745979	21.9953	15.0673	2.69408	0.15718					3.13743	10.7939		2.62991			18.8316	14.3449			7.15342		27.5086	159.72	0.0895017
Set103	48.2912	17.5425	47.8219	33.3975		28.9467	42.8859	63.2174	0.927279	4.56032	6.77767	23.7059		323.19	7.56743	1.55553	25.7847		11.6778		277.364	10.8561		0.303648	9.40026	2.54227	15.7411		2.75773	0.0507678				17.0763	2.90445	7.29413		6.64744	306.038	7.65687	15.662	14.1035	59.4465		3.12842	71.6355	16.4664		0.17161
Set104	61.1881		48.1469	30.1332		23.9359	26.12	31.625	1.38082	4.43494	8.67845	43.7841	5.56411		3.40529	1.06656	16.9057		16.2594			9.46655		1.62876	11.3273	1.69735	6.98347		2.64937	0.0402038				25.1286	5.64582			6.978			10.9581	6.99172	41.0581		2.90453	30.71	21.8262		0.0737956
Set105	29.3093		64.6277	42.2951		32.5106	37.318	31.4423	1.02615	5.52278	10.0388	87.3958	1.23708		5.20496	1.93824	66.8336					12.1528		1.685	5.61405	3.41325	19.1267		2.22341	0.0402038				31.0811	3.99359	5.9043	73.1548	6.16416			24.4702	33.2501			2.90453			142.732	0.0601906
Set106		26.9198	71.8937	14.3864		22.0102	41.0303	39.1416	2.51771	4.33493	18.9859	29.2052	6.58232	274.803	6.89622	0.687561	13.9979	10.7767	12.5147			20.8984	68.1206	0.294582	9.72119	2.54227	6.61676		2.3278	0.0638849				25.8596	3.70794		66.6309	5.30201	293.931		6.6004	27.8051	40.5495		2.76811	21.8759	18.0451		0.303109
Set107	48.2912		37.8107	41.6992		11.973	46.8959	96.0518	1.10593	4.08588	5.21587	20.5364		384.467	20.7406	1.71046	22.6832		13.5724			5.90239		1.30483	13.4505	0.761832	9.79911		2.82035	0.0402038		296.127			4.89824	14.4534		13.3697			15.662	6.99172	24.5722		8.67441	62.6281	9.21028		0.0870369
Set108			25.9796	40.8017		34.6944	26.0828	71.5142	1.96637	4.78571	7.39543	46.2332			7.25063	0.724461	47.9444		14.3901			10.5805		1.49103	6.35595	4.16165	11.1364	16.8122	1.28637	0.0385853					3.70794	1.31484	30.5342	3.19266	177.672		5.63981	10.8707	36.5957		1.30528	62.6281	7.19557		0.254242
Set109		29.8753	56.6367	23.984		19.2797	27.5409	83.912	3.34781	7.06424	5.37749	19.2444	3.01433		16.5452	1.78537	23.7773		10.7588			12.4461		1.62876	11.9082	2.88479	13.7744	61.5021	2.39095	0.0385853	221.347	212.423		46.2563	2.66491			5.18658			21.9516	26.257			3.60197	65.191	9.21028	73.3353	0.0737956
Set110	44.6829		90.423	28.74		32.1634	22.6611	84.5024	1.18961	7.68252	6.77767	16.729			12.3956	0.724461	16.9057		12.1307			9.28374		1.61204	18.494	0.903847	4.98034		2.5686	0.0221227				37.4729	5.21549		68.8573	5.55785		9.83698	5.11963	23.767	44.8796		3.02305	71.5027	13.2011	103.964	0.0755286
Set111		23.1878	68.1168	45.9177		26.3399	28.8629	38.4968	1.07547	5.98249	14.9687	30.9686		146.434	26.933	0.548082	7.56709		35.9307			14.5097		0.356588	4.58634	2.74667	7.97533		2.49345	0.0340511				6.74459	4.38599	27.7764		2.72223		8.52319	6.54667	16.2479	8.93797		8.01361			107.644	0.0972562
Set112	48.2912	36.1926	59.4655	36.7476		28.0092	32.437	28.3494	1.158	4.70088	9.51849	52.8965		183.913	15.543	1.25537	21.0842		12.5147		54.9563	9.46655		0.779551	5.44083	3.68922	5.18696	32.5487	1.26566	0.111966				11.9104	3.28053	11.7921	62.3633	5.17367		7.65687	6.54667	33.8199			5.48267	81.5554	2.52931	26.2761	0.109511
[truncated: 888 more rows]
[truncated: 30 more columns]

## Sheet: GOBP-S1500
	acetazolamide	adapin	ajmaline	allopurinol	allylalcohol	amiodarone	amitriptyline	aspirin	azathioprine	benzbromarone	benziodarone	bromobenzene	bromoethylamine	bucetin	caffeine	carboplatin	chlormezanone	chlorpheniramine	chlorpromazine	cimetidine	ciprofloxacin	clofibrate	clomipramine	colchicine	coumarin	cyclophosphamide	cyclosporinea	diazepam	diclofenac	doxorubicin	enalapril	erythromycinethylsuccinate	ethanol	ethionamide	ethionine	etoposide	furosemide	gentamicin	griseofulvin	haloperidol	hydroxyzine	ibuprofen	imipramine	indomethacin	iproniazid	isoniazid	ketoconazole	labetalol	lornoxicam
[truncated: 1 more rows]
[truncated: 30 more columns]

[truncated: 9 more sheets: BioPlanet-60Perc, BioPlanet-11Perc, BioPlanet-S1500, REACTOME-60Perc, REACTOME-11Perc, REACTOME-S1500, WGCNA-60Perc, WGCNA-11Perc, WGCNA-S1500]
