# Supplementary material for: Transcriptomic point of departure determination: a comparison of distribution-based and gene set-based approaches
Source: Front Genet. 2024 May 9;15:1374791. doi: 10.3389/fgene.2024.1374791 (PMC11112360; doi:10.3389/fgene.2024.1374791)
Supplement: Supplementary file 9 [file Table1.xlsx]

## Sheet: Supplementary Table S1
Filter Name	Minimum Number of Genes with a BMD	Minimum Percentage of Genes with a BMD
Filter 1	2	2
Filter 2	3	3
Filter 3 (NTP Filter)	3	5
Filter 4	5	5
Filter 5	5	7
Filter 6	7	7
Filter 7	7	10
Filter 8	10	10
Filter 9	10	13
Filter 10	13	13
Filter 11	15	15
